# Supplementary material for: Multiomic analysis of human kidney disease identifies a tractable inflammatory, pro-fibrotic tubular cell phenotype
Source: Research Square preprint supplement (doi:10.21203/rs.3.rs-3964901/v1), 2024-02-20
Supplement: Supplementary file 1 [file 727e47069568c4e0c9e07caf.xlsx]

## Sheet: Supplementary Table 1
	Supplementary Table 1. Clinical characteristics of multiome samples.
	Summary of clinical characteristics of patients in which snRNA/ATAC sequencing was performed on the non-tumorous portion of their tumour nephrectomy specimens. Comparisons of clinical and histological characteristics between the unobstructed and obstructed groups were performed by students t-test or Chi-test for continuous or categorical data respectively.
		Control (n=7)	Obstructed (n=5)	p-value
	Age (Years)	68.1 (±7.5)	74.6 (±10.0)	0.23
	Sex (M/F)	4/3	4/1	0.41
	Baseline eGFR (ml/min/1.73m2)	87.9 (±8.9)	58.6 (±23.3)	0.01
	Post-op eGFR (ml/min/1.73m2)	52.9 (±5.1)	53.6 (±10.8)	0.87
	Glomerulosclerosis (%)	6.1 (±3.5)	10.4 (±16.7)	0.52
	Tubulointerstitial fibrosis (%)	8.9 (±4.6)	59.0 (±16.0)	<0.0001
	Tubular atrophy (%)	8.4 (±4.0)	65.0 (±24.4)	0.0001

## Sheet: Supplementary Table 2
	Supplementary Table 2. Summary of the multiome experiment.
	Summary of snRNA/ATAC-seq experiment and samples. The left panel shows detailed clinical characteristics of samples used. The middle panel shows the pooling layout with samples pooled in different libraries, with the number (percentage) of post-QC nuclei recovery shown. The right panel shows key assay performance metrics. eGFR, estimated glomerular filtration rate; UMI, unique molecular identifie…
										n Nuclei (post-QC)							GEX (post-QC)		ATAC (post-QC)
		Age (Years)	Sex	Baseline eGFR (ml/min/1.73m2)	Post-op eGFR (ml/min/1.73m2)	% Sclerosed Glomeruli	% Tubulointerstitial Fibrosis	% Tubular Atrophy	Hypertension	Library 1	Library 2	Library 3	Library 4	Library 5	Library 6	n Nuclei	Mean UMIs	Mean Genes	Mean Fragments	Mean Peaks
	Control1	68	M	94	55	5	5	5	N	1169 (23.40%)						1169	3583	1753	5786	4771
	Control2	84	M	84	55	5	5	5	Y		1730 (18.76%)			2243 (16.31%)		3973	3106	1620	13569	10397
	Control3	64	F	99	62	5	10	15	Y				443 (13.71%)			443	2722	1492	16411	11559
	Control4	66	M	86	48	10	15	12	Y	1128 (22.58%)					1132 (8.64%)	2260	2865	1565	9178	7396
	Control5	70	F	78	48	12	15	10	Y		1831 (19.85%)					1831	2518	1427	10802	8405
	Control6	63	F	97	53	3	5	5	N				881 (27.26%)		1070 (8.16%)	1951	2704	1510	12789	9686
	Control7	62	M	77	49	3	7	7	Y		1983 (21.50%)				1530 (11.67%)	3513	2869	1522	10606	8376
	UUO1	60	M	98	71	0	70	70	N		2259 (24.50%)	1712 (64.80%)				3971	2014	1207	15326	11177
	UUO2	69	M	44	44	2	70	70	Y	2699 (54.02%)	1419 (15.39%)		657 (20.33%)			4775	2824	1488	9589	7362
	UUO3	82	F	46	49	5	35	35	N			930 (35.20%)	1251 (38.71%)	3235 (23.52%)		5416	2392	1358	12544	9393
	UUO4	79	M	62	57	40	50	50	N					4399 (31.98%)	4790 (36.54%)	9189	1337	874	9610	7306
	UUO5	83	M	43	47	5	70	100	N					3879 (28.20%)	4587 (34.99%)	8466	2784	1464	9021	7178
									n Nuclei	4996	9222	2642	3232	13756	13109
								GEX (post-QC)	Mean UMIs	3324	2596	1800	2605	2374	2143
									Mean Genes	1659	1432	1085	1445	1316	1231
								ATAC (post-QC)	Mean Fragments	5905	12307	13382	13642	12328	8995
									Mean Peaks	4857	9454	9457	9783	9350	7176

## Sheet: Supplementary Table 3
	Supplementary Table 3. Summary of multiome cluster annotations.
	Cell annotations at different resolutions for all identified clusters and respective assay performance metrics and the number of recovered nuclei. The left panel shows the relationship between different annotation levels. The middle panel shows assay performance for each cell type. The right panel shows the number (percentage of total) of recovered nuclei in each sample.
							GEX (post-QC)		ATAC (post-QC)		n Nuclei
		Level 1 Annotation	Level 2 Annotation	Alias	Full name	Notes	mean UMIs	mean Genes	mean Fragments	mean Peaks	Control1	Control2	Control3	Control4	Control5	Control6	Control7	UUO1	UUO2	UUO3	UUO4	UUO5	n Nuclei	% Nuclei
	1	PT	PT S1	PT Healthy	Proximal Tubule Segment 1	Higher PRODH2, SLC7A8, SLC36A2, SLC7A8, SLC4A4 (vs S2/S3)	5433.17	2470.86	16492.6	12810.2	40 (3.42%)	432 (10.87%)	19 (4.29%)	178 (7.88%)	60 (3.28%)	154 (7.89%)	339 (9.65%)	21 (0.53%)	61 (1.28%)	12 (0.22%)	4 (0.04%)	495 (5.85%)	1815	3.86524
	2	PT	PT S2	PT Healthy	Proximal Tubule Segment 2	Intermediate between S1 and S; MIR924HG	3846.44	1923.31	14719.6	11442.6	23 (1.97%)	162 (4.08%)	10 (2.26%)	136 (6.02%)	26 (1.42%)	96 (4.92%)	317 (9.02%)	24 (0.6%)	61 (1.28%)	5 (0.09%)	1 (0.01%)	299 (3.53%)	1160	2.47035
	3	PT	PT S3	PT Healthy	Proximal Tubule Segment 3	Higher SLC5A11, SLC30A8, SLC7A13, SLC22A7 NEBL, KCNIP4, ABCC3 (vs S1/S2)	3444.32	1800.83	15076	11532.8	35 (2.99%)	100 (2.52%)	115 (25.96%)	162 (7.17%)	89 (4.86%)	50 (2.56%)	96 (2.73%)	26 (0.65%)	20 (0.42%)	22 (0.41%)	6 (0.07%)	281 (3.32%)	1002	2.13387
	4	TAL	cTAL1	TAL Healthy	Cortical Thick Ascending Limb Cluster 1	Higher DACH1, LRMDA, TMEM52B, JAG1 (vs cTAL2/mTAL)	3401.33	1812.72	11526.9	9038.62	96 (8.21%)	354 (8.91%)	53 (11.96%)	235 (10.4%)	215 (11.74%)	136 (6.97%)	157 (4.47%)	15 (0.38%)	12 (0.25%)	223 (4.12%)	1 (0.01%)	415 (4.9%)	1912	4.07181
	5	TAL	cTAL2	TAL Healthy	Cortical Thick Ascending Limb Cluster 2	Higher THSD4, CALCR, TEX41 (vs cTAL1, mTAL)	3150.74	1702.55	10725.5	8414.54	153 (13.09%)	571 (14.37%)	25 (5.64%)	276 (12.21%)	252 (13.76%)	261 (13.38%)	412 (11.73%)	20 (0.5%)	4 (0.08%)	126 (2.33%)	2 (0.02%)	651 (7.69%)	2753	5.86281
	6	TAL	mTAL	TAL Healthy	Medullary Thick Ascending Limb	Higher RGS6, FOXP2, PROX1 (vs cTAL1, cTAL2)	3205.61	1787.59	10770.7	8437.98	140 (11.98%)	258 (6.49%)	12 (2.71%)	350 (15.49%)	308 (16.82%)	227 (11.64%)	14 (0.4%)	5 (0.13%)	10 (0.21%)	503 (9.29%)	1 (0.01%)	371 (4.38%)	2199	4.68301
	7	TAL	Macula Densa	/	Macula Densa	ROBO2, NOS1; no clear cluster boundaries	3444.17	1782.15	12422	9584.05	8 (0.68%)	35 (0.88%)	0 (0%)	9 (0.4%)	0 (0%)	3 (0.15%)	22 (0.63%)	2 (0.05%)	2 (0.04%)	3 (0.06%)	4 (0.04%)	23 (0.27%)	111	0.236386
	8	DTL	DTL	/	Descending Thin Limb	More PT-like; higher SLC6A6, PTH2R, NRP1 (vs ATL)	2519.49	1464.24	14546.3	10811.1	8 (0.68%)	9 (0.23%)	17 (3.84%)	18 (0.8%)	21 (1.15%)	12 (0.62%)	6 (0.17%)	0 (0%)	6 (0.13%)	112 (2.07%)	4 (0.04%)	56 (0.66%)	269	0.572865
	9	ATL	ATL	/	Ascending Thin Limb	More TAL-like; higher SIM2, SLC12A1, MECOM (vs DTL)	1737.97	1095.03	10847.3	8318.72	17 (1.45%)	12 (0.3%)	34 (7.67%)	45 (1.99%)	44 (2.4%)	37 (1.9%)	1 (0.03%)	1 (0.03%)	15 (0.31%)	272 (5.02%)	4 (0.04%)	135 (1.59%)	617	1.31397
	10	DCT	DCT1	DCT Healthy	Distal Convoluted Tubule Cluster 1	more TAL-like; higher CALCR, PID1 (vs DCT2)	3663.04	1836.04	12254.5	9538.9	85 (7.27%)	302 (7.6%)	4 (0.9%)	80 (3.54%)	136 (7.43%)	150 (7.69%)	300 (8.54%)	5 (0.13%)	0 (0%)	3 (0.06%)	2 (0.02%)	263 (3.11%)	1330	2.83238
	11	DCT	DCT2	DCT Healthy	Distal Convoluted Tubule Cluster 2	more CNT-like; higher SLC8A1, ARL15, LINC01099 (vs DCT1)	3564.68	1803.47	12266.9	9556.98	35 (2.99%)	240 (6.04%)	9 (2.03%)	33 (1.46%)	69 (3.77%)	69 (3.54%)	265 (7.54%)	1 (0.03%)	4 (0.08%)	4 (0.07%)	1 (0.01%)	202 (2.39%)	932	1.98479
	12	CNT	CNT	CNT Healthy	Connecting Tubule	SLC8A1, SNTG1	2647.02	1415.54	10434.3	8088.35	76 (6.5%)	293 (7.37%)	3 (0.68%)	96 (4.25%)	96 (5.24%)	202 (10.35%)	323 (9.19%)	4 (0.1%)	4 (0.08%)	15 (0.28%)	4 (0.04%)	446 (5.27%)	1562	3.32645
	13	PC	cPC	PC Healthy	Cortical Principal Cell	Higher HMGCS1, INSIG1, ST3GAL4 (vs mPC)	2465.46	1328.01	10164.4	7826.22	60 (5.13%)	113 (2.84%)	13 (2.93%)	49 (2.17%)	99 (5.41%)	51 (2.61%)	83 (2.36%)	0 (0%)	0 (0%)	7 (0.13%)	2 (0.02%)	328 (3.87%)	805	1.71433
	14	PC	mPC	PC Healthy	Medullary Principal Cell	Higher SLC14A2, HIF1A (vs cPC); no definitive cluster boundaries with PC Injured	3124.44	1615.56	12280.1	9381.74	38 (3.25%)	40 (1.01%)	15 (3.39%)	51 (2.26%)	46 (2.51%)	17 (0.87%)	3 (0.09%)	0 (0%)	1 (0.02%)	30 (0.55%)	4 (0.04%)	102 (1.2%)	347	0.738974
	15	IC	cIC-A	IC Healthy	Cortical Intercalated Cell Type A	Higher CACNB2, PTPRG, NXPH2 (compared to mIC-A)	3500.07	1776.13	11454.8	9020.88	25 (2.14%)	101 (2.54%)	2 (0.45%)	47 (2.08%)	61 (3.33%)	66 (3.38%)	116 (3.3%)	12 (0.3%)	9 (0.19%)	4 (0.07%)	39 (0.42%)	147 (1.74%)	629	1.33952
	16	IC	mIC-A	IC Healthy	Medullary Intercalated Cell Type A	Higher CALCA, HYAL4 (vs cIC-A); not conclusive identity	3637.03	1910.02	11855	9310.59	16 (1.37%)	25 (0.63%)	2 (0.45%)	23 (1.02%)	21 (1.15%)	11 (0.56%)	0 (0%)	0 (0%)	0 (0%)	4 (0.07%)	0 (0%)	12 (0.14%)	114	0.242775
	17	IC	IC-B	IC Healthy	Medullary Intercalated Cell Type B	Higher SLC26A4, SLC35F3, SLC4A9 (vs cIC-A, mIC-A)	2640.27	1413.34	12241.1	9278.7	11 (0.94%)	108 (2.72%)	2 (0.45%)	27 (1.19%)	70 (3.82%)	45 (2.31%)	179 (5.1%)	59 (1.49%)	113 (2.37%)	9 (0.17%)	8 (0.09%)	60 (0.71%)	691	1.47156
	18	PT	PT Injured	/	Injured Proximal Tubule	Injury signature; Enriched in UUO	3503.56	1840.56	16181.2	12286.7	23 (1.97%)	94 (2.37%)	12 (2.71%)	43 (1.9%)	50 (2.73%)	64 (3.28%)	225 (6.4%)	500 (12.59%)	358 (7.5%)	172 (3.18%)	150 (1.63%)	328 (3.87%)	2019	4.29968
	19	TAL	TAL Injured	/	Injured Thick Ascending Limb	Injury signature; Enriched in UUO	3458.94	1813.36	12515.4	9668.96	25 (2.14%)	11 (0.28%)	3 (0.68%)	47 (2.08%)	6 (0.33%)	5 (0.26%)	40 (1.14%)	57 (1.44%)	652 (13.65%)	499 (9.21%)	344 (3.74%)	180 (2.13%)	1869	3.98024
	20	DCT	DCT Injured	/	Injured Distal Convoluted Tubule	Injury signature; Enriched in UUO	3587.43	1861.91	16840.8	12839.3	1 (0.09%)	4 (0.1%)	0 (0%)	4 (0.18%)	0 (0%)	1 (0.05%)	30 (0.85%)	207 (5.21%)	222 (4.65%)	53 (0.98%)	177 (1.93%)	25 (0.3%)	724	1.54184
	21	CNT	CNT Injured	/	Injured Connecting Tubule	No definitive cluster boundaries with PC Injured	3412.18	1808.77	17199.5	12859.3	0 (0%)	4 (0.1%)	0 (0%)	6 (0.27%)	0 (0%)	0 (0%)	6 (0.17%)	89 (2.24%)	77 (1.61%)	22 (0.41%)	23 (0.25%)	13 (0.15%)	240	0.511106
	22	PC	PC Injured	/	Injured Principal Cell	Injury signature; Enriched in UUO; No definitive cluster boundaries with mPC , CNT Injured	3519.2	1837.19	16615.4	12442.9	0 (0%)	1 (0.03%)	0 (0%)	0 (0%)	0 (0%)	0 (0%)	3 (0.09%)	39 (0.98%)	40 (0.84%)	197 (3.64%)	8 (0.09%)	49 (0.58%)	337	0.717678
	23	IC	IC-A Injured	/	Injured Intercalated Cell	Injury signature; Enriched in UUO	3754.1	1922.14	14808.2	11255	0 (0%)	1 (0.03%)	0 (0%)	6 (0.27%)	0 (0%)	0 (0%)	4 (0.11%)	174 (4.38%)	126 (2.64%)	35 (0.65%)	10 (0.11%)	4 (0.05%)	360	0.766659
	24	PT	PT Inflammatory	/	Inflammatory Proximal Tubule	Injury and inflammatory signature; Enriched in UUO	3974.05	1997.43	18353.9	13686.3	6 (0.51%)	14 (0.35%)	1 (0.23%)	13 (0.58%)	2 (0.11%)	2 (0.1%)	25 (0.71%)	231 (5.82%)	137 (2.87%)	36 (0.66%)	56 (0.61%)	90 (1.06%)	613	1.30545
	25	TAL	TAL Inflammatory	/	Inflammatory Thick Ascending Limb	Injury and inflammatory signature; Enriched in UUO	3465.12	1801.9	14143.3	10835	17 (1.45%)	6 (0.15%)	9 (2.03%)	37 (1.64%)	5 (0.27%)	1 (0.05%)	12 (0.34%)	224 (5.64%)	446 (9.34%)	266 (4.91%)	39 (0.42%)	117 (1.38%)	1179	2.51081
	26	PEC	PEC	/	Parietal Epithelial Cell	CFH, VCAM1, WT1, RBFOX1, ALDH1A2	2069.89	1220.84	9108.25	7058.4	26 (2.22%)	83 (2.09%)	0 (0%)	19 (0.84%)	6 (0.33%)	30 (1.54%)	47 (1.34%)	18 (0.45%)	31 (0.65%)	12 (0.22%)	10 (0.11%)	51 (0.6%)	333	0.709159
	27	Podocyte	Podocyte	/	Podocyte	NPHS1, NPHS2, WT1	2739.81	1376.69	9841.84	7343.7	6 (0.51%)	9 (0.23%)	0 (0%)	6 (0.27%)	2 (0.11%)	4 (0.21%)	8 (0.23%)	4 (0.1%)	6 (0.13%)	13 (0.24%)	9 (0.1%)	41 (0.48%)	108	0.229998
	28	Endothelia	Endothelia Glomerular	/	Glomerular Endothelium	Higher ITGA8, EMCN, EHD3 (vs other Endothelia)	1835.99	1076.02	7022.13	5461.79	20 (1.71%)	7 (0.18%)	2 (0.45%)	18 (0.8%)	13 (0.71%)	6 (0.31%)	10 (0.28%)	37 (0.93%)	144 (3.02%)	8 (0.15%)	55 (0.6%)	43 (0.51%)	363	0.773048
	29	Endothelia	Descending Vasa Recta	/	Descending Vasa Recta	Higher ABI3BP, CCDC3, ADAMTS6 (vs other Endothelia)	1767.15	1037.4	6456.24	5061.24	5 (0.43%)	4 (0.1%)	0 (0%)	8 (0.35%)	0 (0%)	0 (0%)	7 (0.2%)	1 (0.03%)	2 (0.04%)	4 (0.07%)	4 (0.04%)	20 (0.24%)	55	0.117128
	30	Endothelia	Ascending Vasa Recta	/	Ascending Vasa Recta	Higher TMTC2, TLL1 (vs other Endothelia)	1501.95	964.87	9428.6	7248.67	16 (1.37%)	22 (0.55%)	4 (0.9%)	19 (0.84%)	21 (1.15%)	6 (0.31%)	2 (0.06%)	49 (1.23%)	44 (0.92%)	67 (1.24%)	8 (0.09%)	96 (1.13%)	354	0.753881
	31	Endothelia	Peritubular Capillary Endothelia	/	Peritubular Capillary Endothelium	Higher LNX1, GRB10, SLCO2A1 (vs other Endothelia)	1289.78	836.571	5337.85	4324.99	77 (6.59%)	139 (3.5%)	5 (1.13%)	51 (2.26%)	45 (2.46%)	39 (2%)	145 (4.13%)	7 (0.18%)	41 (0.86%)	4 (0.07%)	5 (0.05%)	267 (3.15%)	825	1.75693
	32	Interstitium	Pericyte	/	Pericyte	PDGFRB+, RGS5; Pericyte/vSMC/Mesangial Cell not well resolved	1062.41	709.989	7673.23	6024.16	1 (0.09%)	12 (0.3%)	4 (0.9%)	0 (0%)	0 (0%)	4 (0.21%)	13 (0.37%)	1 (0.03%)	9 (0.19%)	9 (0.17%)	17 (0.19%)	17 (0.2%)	87	0.185276
	33	Interstitium	vSMC	/	Vascular Smooth Muscle Cell	PDGFRB+, MYH11; Pericyte/vSMC/Mesangial Cell not well resolved	1408.88	875.117	9449.73	7060.78	1 (0.09%)	1 (0.03%)	0 (0%)	1 (0.04%)	0 (0%)	1 (0.05%)	1 (0.03%)	0 (0%)	2 (0.04%)	19 (0.35%)	7 (0.08%)	27 (0.32%)	60	0.127776
	34	Interstitium	JG Cell	/	Juxtaglomerular Cell	REN	1932.75	1094.84	8733	6849.16	0 (0%)	5 (0.13%)	0 (0%)	2 (0.09%)	1 (0.05%)	2 (0.1%)	12 (0.34%)	1 (0.03%)	2 (0.04%)	0 (0%)	4 (0.04%)	3 (0.04%)	32	0.0681475
	35	Interstitium	Fibroblast	/	Fibroblast	PDGFRA+, PDFRB+, DCN	1803.36	1017.92	10691.3	8228.29	1 (0.09%)	47 (1.18%)	12 (2.71%)	15 (0.66%)	1 (0.05%)	27 (1.38%)	36 (1.02%)	0 (0%)	0 (0%)	1 (0.02%)	0 (0%)	1 (0.01%)	141	0.300275
	36	Interstitium	Myofibroblast	/	Myofibroblast	PDGFRA+, PDGFRB+, DCN; Higher collagen expression; Enriched in UUO	1792.96	1070.55	10719.8	8279.93	2 (0.17%)	15 (0.38%)	3 (0.68%)	3 (0.13%)	4 (0.22%)	0 (0%)	1 (0.03%)	18 (0.45%)	38 (0.8%)	173 (3.19%)	190 (2.07%)	138 (1.63%)	585	1.24582
	37	Myeloid Cell	CD16 Monocyte	/	CD16+ Monocyte	FCGR3A+, CD14-	2064.08	1249.36	8434.55	6714.93	5 (0.43%)	22 (0.55%)	1 (0.23%)	4 (0.18%)	1 (0.05%)	8 (0.41%)	9 (0.26%)	27 (0.68%)	19 (0.4%)	22 (0.41%)	32 (0.35%)	60 (0.71%)	210	0.447218
	38	Myeloid Cell	CD14 Monocyte	/	CD14+ Monocyte	CD14+, CD16-, VCAN	1530.6	978.833	10175.9	7861.43	1 (0.09%)	10 (0.25%)	5 (1.13%)	3 (0.13%)	1 (0.05%)	3 (0.15%)	10 (0.28%)	71 (1.79%)	77 (1.61%)	100 (1.85%)	68 (0.74%)	75 (0.89%)	424	0.902954
	39	Myeloid Cell	Monocyte Transitioning	/	Transitioning/Intermediate Monocyte	Intermediate between Monocyte, cDC2, Macrophage	1670.49	1059.55	10331.1	8007.89	1 (0.09%)	4 (0.1%)	0 (0%)	6 (0.27%)	2 (0.11%)	0 (0%)	5 (0.14%)	37 (0.93%)	54 (1.13%)	48 (0.89%)	87 (0.95%)	43 (0.51%)	287	0.611197
	40	Myeloid Cell	Macrophage Activated	/	Activated Macrophage	Higher inflammatory markers, e.g. CCL2, CCL8 (vs. Resident Macrophage); enriched in UUO	2281.09	1297.15	9333.41	7298.45	10 (0.86%)	11 (0.28%)	0 (0%)	1 (0.04%)	9 (0.49%)	1 (0.05%)	0 (0%)	60 (1.51%)	142 (2.97%)	315 (5.82%)	217 (2.36%)	216 (2.55%)	982	2.09127
	41	Myeloid Cell	Macrophage Resident	/	Resident Macrophage	Higher scavenger receptors, e.g. MRC1, CD163; Enriched in Control	1301.68	851.695	8125.01	6436.48	2 (0.17%)	87 (2.19%)	9 (2.03%)	46 (2.04%)	18 (0.98%)	64 (3.28%)	53 (1.51%)	0 (0%)	9 (0.19%)	1 (0.02%)	2 (0.02%)	1 (0.01%)	292	0.621846
	42	Myeloid Cell	Macrophage HIF1A+	/	HIF1A+ Macrophage (likely medullary)	Higher HIF1A+ expressed (vs other Macrophages); PLAUR, VEGFA	1822.81	1059.26	11085.7	8439.37	0 (0%)	1 (0.03%)	2 (0.45%)	1 (0.04%)	2 (0.11%)	0 (0%)	0 (0%)	20 (0.5%)	22 (0.46%)	2 (0.04%)	40 (0.44%)	3 (0.04%)	93	0.198054
	43	Myeloid Cell	cDC1	/	Type 1 Conventional Dendritic Cell	Higher IRF8, IDO1 (vs cDC2)	2512.18	1414.51	12633.6	9687.71	0 (0%)	1 (0.03%)	0 (0%)	1 (0.04%)	0 (0%)	0 (0%)	1 (0.03%)	4 (0.1%)	5 (0.1%)	6 (0.11%)	26 (0.28%)	7 (0.08%)	51	0.10861
	44	Myeloid Cell	cDC2	/	Type 2 Conventional Dendritic Cell	Higher FCER1A, CD1C (vs cDC2); Higher FLT3, BACH2, HLA (vs Monocytes)	1833.85	1163.57	11420.7	8751.15	1 (0.09%)	6 (0.15%)	0 (0%)	3 (0.13%)	1 (0.05%)	2 (0.1%)	2 (0.06%)	28 (0.71%)	57 (1.19%)	31 (0.57%)	135 (1.47%)	28 (0.33%)	294	0.626105
	45	Myeloid Cell	cDC CCR7+	/	CCR7+ Conventional Dendritic Cell	Higher CCR7, LAMP3 (vs cDC1, cDC2); IRF8+ IDO+ FCER1A-	2236.21	1126.03	9947.74	7787.74	1 (0.09%)	0 (0%)	0 (0%)	0 (0%)	0 (0%)	0 (0%)	0 (0%)	6 (0.15%)	8 (0.17%)	3 (0.06%)	18 (0.2%)	2 (0.02%)	38	0.0809251
	46	Myeloid Cell	pDC	/	Plasmacytoid Dendritic Cell	IL3RA, CLEC4C	1662.39	1044.55	12734.7	9353.94	1 (0.09%)	1 (0.03%)	0 (0%)	1 (0.04%)	0 (0%)	0 (0%)	2 (0.06%)	49 (1.23%)	45 (0.94%)	15 (0.28%)	82 (0.89%)	32 (0.38%)	228	0.485551
	47	Myeloid Cell	Mast Cell	/	Mast Cell	MS4A2, CPA3	916.317	657.796	13510.3	9940.64	1 (0.09%)	5 (0.13%)	0 (0%)	4 (0.18%)	0 (0%)	1 (0.05%)	2 (0.06%)	2 (0.05%)	13 (0.27%)	16 (0.3%)	90 (0.98%)	8 (0.09%)	142	0.302404
	48	T Cell	Treg	/	Regulatory T Cell	FOXP3	1030.07	727.072	6600.79	5079.96	0 (0%)	9 (0.23%)	1 (0.23%)	1 (0.04%)	0 (0%)	2 (0.1%)	2 (0.06%)	48 (1.21%)	106 (2.22%)	59 (1.09%)	827 (9%)	105 (1.24%)	1160	2.47035
	49	T Cell	Naïve Th Cell	/	Naïve T Cell (CD4+)	CD4+; Higher NELL2, TCF7, SELL, CCR7 (vs Effector Th Cell); other subtypes unresolved	1187.9	820.094	7660.57	5710.08	10 (0.86%)	31 (0.78%)	8 (1.81%)	7 (0.31%)	0 (0%)	7 (0.36%)	28 (0.8%)	768 (19.34%)	303 (6.35%)	432 (7.98%)	1431 (15.57%)	633 (7.48%)	3658	7.79011
	50	T Cell	Effector Th Cell	/	Effector T Cell (CD4+)	CD4+; Higher TNFAIP3, AOAH, CD69 (vs Naïve Th Cell); other subtypes unresolved	974.652	692.388	7037.36	5338.71	2 (0.17%)	37 (0.93%)	8 (1.81%)	8 (0.35%)	5 (0.27%)	10 (0.51%)	19 (0.54%)	150 (3.78%)	95 (1.99%)	185 (3.42%)	135 (1.47%)	140 (1.65%)	794	1.69091
	51	T Cell	Naïve Tc Cell	/	Naïve T Cell (CD8+)	CD8+; Higher NELL2, TCF7, SELL, CCR7, BACH2 (vs Effector Th Cell); other subtypes unresolved	1023.95	726.391	7796.22	5803.74	0 (0%)	3 (0.08%)	2 (0.45%)	5 (0.22%)	6 (0.33%)	10 (0.51%)	16 (0.46%)	188 (4.73%)	235 (4.92%)	291 (5.37%)	913 (9.94%)	133 (1.57%)	1802	3.83755
	52	T Cell	Effector Tc Cell	/	Effector T Cell (CD8+)	CD8+; Higher CD69, RGS1, CCL4 (vs Naïve Tc Cell); other subtypes unresolved	879.422	632.442	5918.76	4520.24	8 (0.68%)	18 (0.45%)	0 (0%)	16 (0.71%)	5 (0.27%)	9 (0.46%)	27 (0.77%)	179 (4.51%)	239 (5.01%)	510 (9.42%)	432 (4.7%)	378 (4.46%)	1821	3.87802
	53	T Cell	MAIT	/	Mucosal Associated Invariant T Cell	SLC4A10, IKZF2	1050.45	740.592	6670.57	5094.03	0 (0%)	7 (0.18%)	5 (1.13%)	0 (0%)	1 (0.05%)	0 (0%)	3 (0.09%)	15 (0.38%)	228 (4.77%)	10 (0.18%)	108 (1.18%)	18 (0.21%)	395	0.841195
	54	T Cell	NKT Cell	/	NKT Cell	CD3D+ CD8A+, NKG7+ GZMB+ GNLY+	1162.31	806.429	6195.2	4830.96	4 (0.34%)	12 (0.3%)	1 (0.23%)	9 (0.4%)	10 (0.55%)	24 (1.23%)	7 (0.2%)	42 (1.06%)	67 (1.4%)	146 (2.7%)	27 (0.29%)	131 (1.55%)	480	1.02221
	55	T Cell	NK CD56bright	/	CD56bright Natural Killer Cell	FCGR3A+, KIT-	1070.6	740.118	8812.22	6563.18	0 (0%)	2 (0.05%)	1 (0.23%)	1 (0.04%)	1 (0.05%)	2 (0.1%)	5 (0.14%)	16 (0.4%)	60 (1.26%)	50 (0.92%)	156 (1.7%)	87 (1.03%)	381	0.811381
	56	T Cell	NK CD56dim	/	CD56dim Natural Killer Cell	KIT+, FCGR3A-	1161.83	806.704	6165.79	4820.63	19 (1.63%)	53 (1.33%)	4 (0.9%)	25 (1.11%)	0 (0%)	25 (1.28%)	47 (1.34%)	55 (1.39%)	90 (1.88%)	30 (0.55%)	34 (0.37%)	179 (2.11%)	561	1.19471
	57	B Cell	Naïve B Cell	/	Naïve B Cell	Higher IL4R, TCL1A, FCER2 (vs Memory B Cell)	863.032	626.545	9005.94	6650.44	1 (0.09%)	2 (0.05%)	0 (0%)	3 (0.13%)	0 (0%)	0 (0%)	2 (0.06%)	45 (1.13%)	75 (1.57%)	35 (0.65%)	425 (4.63%)	32 (0.38%)	620	1.32036
	58	B Cell	Memory B Cell	/	Memory B Cell	Higher GPM6A, CD1C, CD27, COL4A3, SOX5 (vs Naïve B Cell)	907.177	657.063	9664.91	7133.37	8 (0.68%)	16 (0.4%)	6 (1.35%)	0 (0%)	0 (0%)	4 (0.21%)	7 (0.2%)	270 (6.8%)	117 (2.45%)	129 (2.38%)	2560 (27.86%)	239 (2.82%)	3356	7.14696
	59	B Cell	Plasma Cell	/	Plasma Cell	TXNDC5, TNFRSF17; high Immunoglobulin	1711.28	1024.3	12556.7	8871.94	1 (0.09%)	1 (0.03%)	0 (0%)	2 (0.09%)	0 (0%)	0 (0%)	6 (0.17%)	39 (0.98%)	10 (0.21%)	36 (0.66%)	141 (1.53%)	120 (1.42%)	356	0.75814
										n Nuclei	1169	3973	443	2260	1831	1951	3513	3971	4775	5416	9189	8466

## Sheet: Supplementary Table 4
	Supplementary Table 4. Multiome marker genes.
	List of the top 200 markers of each cluster sorted by log2-fold change. P-values were calculated for genes expressed by at least 3% of cells in the cluster against all other cells using a Wilcoxon rank sum test and p-values were corrected using the Benjamini–Hochberg method. L2FC, log2-fold change; adj. p-value, adjusted p-value.
	Gene	p-value	adj. p-value	Average L2FC	%Expressed - Celltype	%Expressed - Other	Cluster
	CUBN	0	0	2.93465	0.991	0.148	PT S1
	SLC5A12	0	0	2.49659	0.97	0.071	PT S1
	SLC4A4	0	0	2.37439	0.972	0.134	PT S1
	SLC13A3	0	0	2.17806	0.972	0.074	PT S1
	ACSM2B	0	0	2.38416	0.984	0.099	PT S1
	ACSM2A	0	0	2.31974	0.993	0.115	PT S1
	SLC16A9	0	0	2.12402	0.945	0.076	PT S1
	SLC17A1	0	0	2.12194	0.959	0.092	PT S1
	MME	0	0	2.10932	0.933	0.062	PT S1
	NOX4	0	0	2.36861	0.935	0.12	PT S1
	PAH	0	0	1.66795	0.898	0.046	PT S1
	LRP2	0	0	2.08146	0.96	0.121	PT S1
	LINC00871	0	0	2.03688	0.901	0.067	PT S1
	SLC36A2	0	0	1.74593	0.875	0.032	PT S1
	PDZD2	0	0	1.81204	0.939	0.133	PT S1
	SUGCT	0	0	1.66401	0.926	0.173	PT S1
	RAB11FIP3	0	0	1.63302	0.944	0.216	PT S1
	AC098588.3	0	0	1.66121	0.863	0.051	PT S1
	TRPM3	0	0	1.62541	0.967	0.188	PT S1
	BNC2	0	0	1.68869	0.936	0.184	PT S1
	EPB41L3	0	0	1.60939	0.923	0.193	PT S1
	ALDOB	0	0	1.73469	0.858	0.061	PT S1
	WDR72	0	0	1.69112	0.953	0.329	PT S1
	PTPRD	0	0	1.66579	0.904	0.122	PT S1
	LINC01060	0	0	1.82604	0.849	0.057	PT S1
	NLGN1	0	0	1.75326	0.926	0.185	PT S1
	MSRA	0	0	1.50806	0.913	0.188	PT S1
	AL391117.1	0	0	1.61606	0.85	0.076	PT S1
	AGXT2	0	0	1.26664	0.844	0.058	PT S1
	SLC22A6	0	0	1.38024	0.825	0.043	PT S1
	ENPEP	0	0	1.50328	0.842	0.081	PT S1
	GLYAT	0	0	1.28125	0.84	0.074	PT S1
	DPYS	0	0	1.33253	0.819	0.063	PT S1
	KCNJ15	0	0	1.80911	0.861	0.127	PT S1
	DLG2	0	0	1.49373	0.945	0.286	PT S1
	SLC2A9	0	0	1.51763	0.862	0.124	PT S1
	MIR100HG	0	0	1.40161	0.814	0.078	PT S1
	BHMT2	0	0	1.25796	0.853	0.154	PT S1
	PCSK5	0	0	1.32069	0.82	0.095	PT S1
	MAST4	0	0	1.35618	0.963	0.375	PT S1
	CNTNAP3B	0	0	1.40471	0.833	0.107	PT S1
	PTH2R	0	0	1.32865	0.994	0.489	PT S1
	RHOBTB1	0	0	1.58295	0.819	0.096	PT S1
	SLC13A1	0	0	1.501	0.813	0.071	PT S1
	MFSD4B	0	0	1.33373	0.891	0.278	PT S1
	TINAG	0	0	1.42903	0.817	0.093	PT S1
	L3MBTL4	0	0	1.25601	0.902	0.233	PT S1
	FGGY	0	0	1.17966	0.892	0.233	PT S1
	PLEKHA5	0	0	1.43679	0.95	0.429	PT S1
	SMIM2-AS1	0	0	1.30546	0.781	0.067	PT S1
	RMST	0	0	1.55613	0.785	0.08	PT S1
	GPC6	0	0	1.27916	0.865	0.183	PT S1
	AC003044.1	0	0	1.51249	0.772	0.067	PT S1
	NFIB	0	0	1.18997	0.906	0.279	PT S1
	NCKAP5	0	0	1.19781	0.836	0.161	PT S1
	RNF152	0	0	1.51418	0.817	0.161	PT S1
	AC087762.1	0	0	1.18308	0.734	0.052	PT S1
	SLC17A3	0	0	1.24051	0.713	0.039	PT S1
	AL110292.1	0	0	1.32026	0.707	0.037	PT S1
	RALYL	0	0	1.80267	0.773	0.174	PT S1
	AK4	0	0	1.11408	0.723	0.066	PT S1
	DAB2	0	0	0.933011	0.806	0.156	PT S1
	SLIT2	0	0	1.14685	0.783	0.135	PT S1
	AL589669.1	0	0	1.11983	0.734	0.081	PT S1
	GRAMD1B	0	0	1.38851	0.75	0.119	PT S1
	SLC28A1	0	0	0.965505	0.729	0.071	PT S1
	HECW1	0	0	1.0135	0.689	0.044	PT S1
	EHHADH	0	0	0.977294	0.728	0.091	PT S1
	PDZK1	0	0	0.978131	0.739	0.103	PT S1
	IGF1R	0	0	1.0372	0.926	0.408	PT S1
	ACMSD	0	0	1.00264	0.711	0.073	PT S1
	FHIT	0	0	0.991151	0.988	0.716	PT S1
	CRYL1	0	0	0.989687	0.78	0.175	PT S1
	BHMT	0	0	1.217	0.702	0.069	PT S1
	SLC47A1	0	0	0.972236	0.713	0.082	PT S1
	NPL	0	0	1.0276	0.68	0.049	PT S1
	ACSF2	0	0	1.0107	0.707	0.076	PT S1
	PRODH2	0	0	1.02272	0.649	0.019	PT S1
	AC016822.1	0	0	1.11653	0.645	0.014	PT S1
	ASS1	0	0	1.2124	0.672	0.05	PT S1
	LINC02027	0	0	1.06437	0.681	0.059	PT S1
	RNF212B	0	0	1.89196	0.642	0.022	PT S1
	ADAMTS9-AS1	0	0	0.93564	0.798	0.185	PT S1
	GPHN	0	0	1.03894	0.964	0.596	PT S1
	PLG	0	0	1.09462	0.658	0.034	PT S1
	GDA	0	0	1.31858	0.663	0.05	PT S1
	PTH1R	0	0	0.972703	0.763	0.165	PT S1
	CDK14	0	0	0.946453	0.872	0.327	PT S1
	AC027288.3	0	0	1.10324	0.671	0.072	PT S1
	SLC7A8	0	0	1.31037	0.646	0.049	PT S1
	LINC00671	0	0	0.953257	0.683	0.074	PT S1
	NEAT1	0	0	1.08176	0.995	0.908	PT S1
	AC007364.1	0	0	1.03422	0.71	0.106	PT S1
	MAP3K13	0	0	0.985538	0.757	0.186	PT S1
	SLC22A5	0	0	0.985467	0.664	0.075	PT S1
	NHS	0	0	1.00675	0.864	0.312	PT S1
	DIP2C	0	0	0.870109	0.844	0.294	PT S1
	PCDH15	0	0	1.1118	0.61	0.013	PT S1
	UPB1	0	0	0.91975	0.625	0.032	PT S1
	TTC28	0	0	0.926313	0.841	0.292	PT S1
	AC096577.1	0	0	1.50552	0.649	0.055	PT S1
	PPARA	0	0	0.953598	0.758	0.204	PT S1
	TPCN1	0	0	0.913407	0.75	0.189	PT S1
	SORCS1	0	0	1.60354	0.615	0.033	PT S1
	CNTN4	0	0	0.923333	0.748	0.17	PT S1
	GPX3	0	0	0.902891	0.657	0.078	PT S1
	WDFY3	0	0	0.862042	0.876	0.377	PT S1
	LRMDA	0	0	0.886182	0.955	0.42	PT S1
	AIG1	0	0	0.853639	0.766	0.222	PT S1
	EBNA1BP2	0	0	0.927281	0.642	0.066	PT S1
	PDGFC	0	0	0.928843	0.726	0.177	PT S1
	Z93403.1	0	0	1.05442	0.638	0.069	PT S1
	ERRFI1	0	0	1.45855	0.637	0.091	PT S1
	CDHR3	0	0	0.830544	0.68	0.112	PT S1
	GRB10	0	0	0.814979	0.705	0.141	PT S1
	SLC22A8	0	0	0.899307	0.586	0.019	PT S1
	CLDN10	0	0	0.907939	0.724	0.175	PT S1
	2002-03-01	0	0	0.867181	0.648	0.107	PT S1
	PRLR	0	0	0.876606	0.646	0.095	PT S1
	PATJ	0	0	0.766095	0.958	0.557	PT S1
	SLC16A12	0	0	1.23074	0.713	0.201	PT S1
	LIN52	0	0	0.906446	0.649	0.116	PT S1
	CDH2	0	0	0.854832	0.613	0.066	PT S1
	XYLB	0	0	0.803388	0.619	0.075	PT S1
	LINC01622	0	0	0.971438	0.591	0.045	PT S1
	SLC34A1	0	0	1.01242	0.575	0.031	PT S1
	AFM	0	0	0.921593	0.565	0.022	PT S1
	TRABD2B	0	0	0.904112	0.753	0.232	PT S1
	ZNF804B	0	0	1.34814	0.602	0.068	PT S1
	SLC6A13	0	0	0.760676	0.586	0.047	PT S1
	PCLO	0	0	0.81838	0.739	0.23	PT S1
	ARHGAP10	0	0	0.75638	0.667	0.134	PT S1
	CYP4F3	0	0	0.770038	0.553	0.022	PT S1
	LINC01020	0	0	0.895618	0.567	0.035	PT S1
	PTPRM	0	0	0.655469	0.904	0.409	PT S1
	FTL	0	0	1.23035	0.678	0.193	PT S1
	GIPC2	0	0	0.755978	0.585	0.06	PT S1
	TLN2	0	0	0.784426	0.698	0.197	PT S1
	ACO1	0	0	0.806029	0.589	0.075	PT S1
	DMGDH	0	0	0.77211	0.679	0.178	PT S1
	LINC02147	0	0	1.02009	0.569	0.046	PT S1
	HPN	0	0	0.722921	0.673	0.164	PT S1
	HNF4A	0	0	0.728357	0.556	0.041	PT S1
	MAPT	0	0	0.778753	0.548	0.035	PT S1
	PDE4D	0	0	0.480305	0.991	0.759	PT S1
	GLIS1	0	0	0.752786	0.565	0.055	PT S1
	CDH9	0	0	1.02954	0.568	0.062	PT S1
	AGMO	0	0	0.819136	0.558	0.054	PT S1
	PBX1	0	0	0.65415	0.79	0.303	PT S1
	LINC00278	0	0	1.23383	0.691	0.271	PT S1
	SLC1A1	0	0	0.803449	0.601	0.109	PT S1
	PLEKHA7	0	0	0.75416	0.775	0.318	PT S1
	SORBS2	0	0	0.737468	0.77	0.302	PT S1
	UBE2E2	0	0	0.696922	0.843	0.382	PT S1
	ULK4	0	0	0.974727	0.7	0.256	PT S1
	SLC27A2	0	0	0.822818	0.542	0.05	PT S1
	SLC12A6	0	0	0.690389	0.639	0.151	PT S1
	AL033504.1	0	0	0.800193	0.614	0.126	PT S1
	MIA2	0	0	0.650877	0.713	0.241	PT S1
	SLC7A7	0	0	0.846957	0.521	0.035	PT S1
	RTTN	0	0	0.825229	0.625	0.153	PT S1
	PARD3	0	0	0.658306	0.905	0.461	PT S1
	DENND5B	0	0	0.685419	0.693	0.216	PT S1
	AC009060.1	0	0	0.746868	0.562	0.083	PT S1
	TM7SF3	0	0	0.702025	0.603	0.133	PT S1
	TTTY14	0	0	1.06473	0.656	0.231	PT S1
	ANPEP	0	0	0.693103	0.539	0.056	PT S1
	KCNK5	0	0	0.811751	0.521	0.043	PT S1
	KCNQ1OT1	0	0	0.842077	0.72	0.278	PT S1
	TNS1	0	0	0.701651	0.64	0.182	PT S1
	ABCC2	0	0	0.674237	0.513	0.038	PT S1
	FRAS1	0	0	0.811587	0.766	0.315	PT S1
	TEAD1	0	0	0.662997	0.726	0.273	PT S1
	CUX1	0	0	0.643876	0.834	0.4	PT S1
	C11orf54	0	0	0.677622	0.618	0.161	PT S1
	AC108519.1	0	0	0.718595	0.608	0.144	PT S1
	IGSF11	0	0	0.763937	0.504	0.036	PT S1
	ARHGAP42	0	0	0.64486	0.574	0.098	PT S1
	AC087482.1	0	0	0.710145	0.507	0.038	PT S1
	UGT2B7	0	0	0.656491	0.625	0.146	PT S1
	ASTN2	0	0	0.743906	0.67	0.215	PT S1
	SH3YL1	0	0	0.719525	0.599	0.148	PT S1
	BBOX1	0	0	0.735384	0.569	0.099	PT S1
	ANK2	0	0	0.798846	0.646	0.192	PT S1
	ARSB	0	0	0.857922	0.572	0.11	PT S1
	PLPPR1	0	0	1.12209	0.576	0.132	PT S1
	AC004485.1	0	0	0.78163	0.503	0.039	PT S1
	TENM1	0	0	0.679196	0.551	0.092	PT S1
	AL162725.2	0	0	0.913356	0.481	0.019	PT S1
	AC026803.3	0	0	0.650688	0.487	0.025	PT S1
	ST7	0	0	0.719247	0.636	0.196	PT S1
	AC004053.1	0	0	1.06753	0.494	0.036	PT S1
	PPP1R21	0	0	0.639315	0.645	0.198	PT S1
	FTCD	0	0	0.655168	0.507	0.045	PT S1
	GHR	0	0	0.720833	0.572	0.118	PT S1
	G6PC	0	0	0.826366	0.482	0.024	PT S1
	INSR	0	0	0.648295	0.69	0.243	PT S1
	MAGI2	0	0	0.618458	0.732	0.297	PT S1
	NFIA	0	0	0.642373	0.765	0.323	PT S1
	FRMD4B	0	0	0.633988	0.658	0.206	PT S1
	CUBN	0	0	2.6002	0.983	0.161	PT S2
	ACSM2A	0	0	2.30298	0.976	0.128	PT S2
	ACSM2B	0	0	2.23057	0.959	0.112	PT S2
	SLC13A3	0	0	2.10123	0.933	0.088	PT S2
	LRP2	0	0	2.08989	0.953	0.133	PT S2
	PDZD2	0	0	2.01625	0.925	0.145	PT S2
	SLC5A12	0	0	2.09655	0.896	0.086	PT S2
	RAB11FIP3	0	0	1.70778	0.925	0.227	PT S2
	SLC17A1	0	0	1.68064	0.886	0.107	PT S2
	ANKS1B	0	0	1.87296	0.838	0.095	PT S2
	SLC4A4	0	0	1.62765	0.88	0.148	PT S2
	SLC2A9	0	0	1.81747	0.855	0.135	PT S2
	FGGY	0	0	1.42207	0.891	0.242	PT S2
	TRPM3	0	0	1.60663	0.899	0.201	PT S2
	SLC22A6	0	0	1.38538	0.799	0.055	PT S2
	SUGCT	0	0	1.42732	0.865	0.185	PT S2
	SLC16A9	0	0	1.56059	0.818	0.091	PT S2
	MME	0	0	1.53042	0.808	0.078	PT S2
	MSRA	0	0	1.4616	0.855	0.2	PT S2
	LINC01060	0	0	1.66667	0.778	0.07	PT S2
	PTH2R	0	0	1.3992	0.981	0.496	PT S2
	AC087762.1	0	0	1.4084	0.769	0.061	PT S2
	GRAMD1B	0	0	1.69508	0.803	0.127	PT S2
	ALDOB	0	0	1.41354	0.773	0.075	PT S2
	AL391117.1	0	0	1.47304	0.778	0.089	PT S2
	LINC01622	0	0	1.42487	0.739	0.049	PT S2
	L3MBTL4	0	0	1.2741	0.858	0.244	PT S2
	TINAG	0	0	1.33969	0.777	0.104	PT S2
	AGXT2	0	0	1.12363	0.756	0.072	PT S2
	NLGN1	0	0	1.50954	0.84	0.198	PT S2
	ACSF2	0	0	1.25241	0.746	0.084	PT S2
	AC098588.3	0	0	1.25101	0.743	0.066	PT S2
	SLC28A1	0	0	1.17359	0.747	0.08	PT S2
	GLYAT	0	0	1.12918	0.756	0.087	PT S2
	LINC00671	0	0	1.2234	0.74	0.081	PT S2
	AC108519.1	0	0	1.26643	0.769	0.146	PT S2
	AC096577.1	0	0	2.04014	0.716	0.062	PT S2
	ZNF804B	0	0	1.63927	0.728	0.072	PT S2
	SMIM2-AS1	0	0	1.2899	0.734	0.079	PT S2
	RMST	0	0	1.43268	0.744	0.091	PT S2
	BHMT	0	0	1.43613	0.722	0.078	PT S2
	DLG2	0	0	1.30353	0.878	0.297	PT S2
	RNF152	0	0	1.49123	0.779	0.171	PT S2
	NCKAP5	0	0	1.12857	0.799	0.172	PT S2
	AC003044.1	0	0	1.43903	0.724	0.078	PT S2
	INSR	0	0	1.17823	0.813	0.246	PT S2
	PTPRD	0	0	1.17966	0.776	0.137	PT S2
	KCNJ15	0	0	1.59356	0.753	0.141	PT S2
	CRYL1	0	0	1.07931	0.772	0.183	PT S2
	WDR72	0	0	1.23508	0.848	0.34	PT S2
	SYNE2	0	0	1.21606	0.963	0.623	PT S2
	ENPEP	0	0	1.14656	0.719	0.095	PT S2
	DPYS	0	0	1.08393	0.701	0.077	PT S2
	MAST4	0	0	1.19376	0.878	0.386	PT S2
	BHMT2	0	0	1.01884	0.759	0.166	PT S2
	LINC00871	0	0	1.35355	0.707	0.084	PT S2
	CLDN10	0	0	1.15268	0.767	0.182	PT S2
	EBNA1BP2	0	0	1.09566	0.689	0.073	PT S2
	SLC13A1	0	0	1.28891	0.706	0.084	PT S2
	AC007364.1	0	0	1.17082	0.72	0.114	PT S2
	EHHADH	0	0	1.05639	0.703	0.101	PT S2
	EPB41L3	0	0	1.08138	0.781	0.207	PT S2
	AK4	0	0	1.04228	0.671	0.077	PT S2
	ACMSD	0	0	0.984334	0.671	0.083	PT S2
	TRABD2B	0	0	1.2035	0.77	0.239	PT S2
	AL589669.1	0	0	1.08616	0.682	0.091	PT S2
	BNC2	0	0	1.04254	0.778	0.198	PT S2
	PLG	0	0	1.15863	0.63	0.044	PT S2
	PAH	0	0	1.04108	0.655	0.064	PT S2
	PDZK1	0	0	0.918079	0.688	0.113	PT S2
	RHOBTB1	0	0	1.26064	0.684	0.11	PT S2
	SLC16A12	0	0	1.3372	0.743	0.207	PT S2
	MFSD4B	0	0	1.02263	0.783	0.289	PT S2
	ADAMTS9-AS1	0	0	0.955974	0.75	0.195	PT S2
	MAP3K13	0	0	0.962694	0.725	0.195	PT S2
	XYLB	0	0	0.932782	0.643	0.082	PT S2
	SLC5A10	0	0	0.903861	0.604	0.039	PT S2
	HECW1	0	0	0.905676	0.618	0.055	PT S2
	ARSB	0	0	1.33724	0.649	0.115	PT S2
	SLC47A1	0	0	0.875767	0.646	0.092	PT S2
	DAB2	0	0	0.800649	0.719	0.168	PT S2
	CNTN4	0	0	0.924993	0.72	0.179	PT S2
	SLC6A13	0	0	0.907077	0.606	0.054	PT S2
	PTH1R	0	0	0.915188	0.711	0.175	PT S2
	DIP2C	0	0	0.876833	0.79	0.303	PT S2
	ASS1	0	0	1.14418	0.602	0.061	PT S2
	LINC02147	0	0	1.2176	0.598	0.053	PT S2
	KCNQ1OT1	0	0	1.18065	0.755	0.283	PT S2
	SLC27A2	0	0	1.05547	0.598	0.055	PT S2
	CDH9	0	0	1.17673	0.61	0.068	PT S2
	NOX4	0	0	1.1041	0.675	0.138	PT S2
	CNTNAP3B	0	0	0.955458	0.659	0.122	PT S2
	PPARA	0	0	0.948735	0.703	0.213	PT S2
	CDHR3	0	0	0.863008	0.644	0.121	PT S2
	NFIB	0	0	0.909112	0.776	0.291	PT S2
	TPCN1	0	0	0.859626	0.69	0.198	PT S2
	BBOX1	0	0	0.953073	0.619	0.104	PT S2
	AC098829.1	0	0	1.40495	0.574	0.065	PT S2
	SLC34A1	0	0	0.904981	0.559	0.039	PT S2
	AC009060.1	0	0	0.869628	0.596	0.089	PT S2
	CYP4A11	0	0	0.775451	0.549	0.033	PT S2
	ERRFI1	0	0	1.23777	0.597	0.1	PT S2
	KIAA1549	0	0	0.821704	0.591	0.089	PT S2
	HNF1A-AS1	0	0	0.855437	0.719	0.247	PT S2
	ANPEP	0	0	0.825968	0.569	0.063	PT S2
	MIR100HG	0	0	0.866416	0.594	0.094	PT S2
	HPN	0	0	0.768708	0.648	0.172	PT S2
	AC027288.3	0	0	1.01988	0.572	0.083	PT S2
	GPC6	0	0	0.826085	0.696	0.197	PT S2
	AIG1	0	0	0.767149	0.683	0.232	PT S2
	MGAM	0	0	0.872526	0.526	0.044	PT S2
	LIN52	0	0	0.800476	0.594	0.125	PT S2
	HNF4A	0	0	0.735321	0.527	0.049	PT S2
	LINC00907	0	0	1.0434	0.529	0.061	PT S2
	MIOX	0	0	0.842942	0.512	0.04	PT S2
	AC018467.1	0	0	0.927894	0.521	0.05	PT S2
	KCNK5	0	0	0.895634	0.52	0.05	PT S2
	Z93403.1	0	0	0.911344	0.543	0.079	PT S2
	LINC01020	0	0	0.851542	0.512	0.044	PT S2
	SLC17A3	0	0	0.84677	0.517	0.054	PT S2
	ASPA	0	0	0.692896	0.516	0.055	PT S2
	UPB1	0	0	0.742768	0.504	0.043	PT S2
	SLC36A2	0	0	0.762832	0.521	0.053	PT S2
	PCK1	0	0	0.825711	0.516	0.061	PT S2
	SLIT2	0	0	0.73488	0.609	0.148	PT S2
	PLEKHA6	0	0	0.760438	0.571	0.132	PT S2
	SLC12A6	0	0	0.676257	0.608	0.159	PT S2
	LINC02027	0	0	0.76794	0.527	0.072	PT S2
	GPX3	0	0	0.731381	0.536	0.09	PT S2
	FUT6	0	0	0.667921	0.49	0.041	PT S2
	P4HA2	0	0	0.656001	0.492	0.044	PT S2
	AL110292.1	0	0	0.815684	0.498	0.052	PT S2
	GLIS1	0	0	0.720462	0.506	0.064	PT S2
	SLC1A1	0	0	0.731473	0.553	0.117	PT S2
	AC087482.1	0	0	0.684763	0.486	0.045	PT S2
	G6PC	0	0	0.792436	0.472	0.031	PT S2
	SEMA5A	0	0	0.81768	0.55	0.114	PT S2
	GIPC2	0	0	0.672941	0.499	0.069	PT S2
	PRUNE2	0	0	0.715806	0.541	0.106	PT S2
	PRLR	0	0	0.735791	0.533	0.106	PT S2
	FTCD	0	0	0.675169	0.484	0.053	PT S2
	NQO2	0	0	0.679786	0.51	0.086	PT S2
	ARHGAP42	0	0	0.677961	0.533	0.106	PT S2
	MCF2L	0	0	0.718336	0.545	0.131	PT S2
	SLC22A7	0	0	0.801662	0.449	0.03	PT S2
	PEPD	0	0	0.58932	0.486	0.069	PT S2
	AFMID	0	0	0.661539	0.504	0.092	PT S2
	SHMT1	0	0	0.60479	0.495	0.082	PT S2
	AFM	0	0	0.718393	0.448	0.033	PT S2
	TMEM246-AS1	0	0	0.68373	0.457	0.042	PT S2
	RGL1	0	0	0.554664	0.528	0.113	PT S2
	AC004485.1	0	0	0.734174	0.456	0.047	PT S2
	SLC22A5	0	0	0.668409	0.491	0.088	PT S2
	AL033504.1	0	0	0.73327	0.538	0.135	PT S2
	AL162725.2	0	0	0.820334	0.434	0.027	PT S2
	PCSK5	0	0	0.639484	0.52	0.113	PT S2
	ATP8B4	0	0	0.695036	0.501	0.094	PT S2
	ACO1	0	0	0.602475	0.485	0.085	PT S2
	GDA	0	0	0.714469	0.469	0.064	PT S2
	TTC38	0	0	0.559135	0.481	0.083	PT S2
	ABCC6	0	0	0.573274	0.466	0.069	PT S2
	SLC25A42	0	0	0.593706	0.469	0.073	PT S2
	2002-03-01	0	0	0.628358	0.503	0.118	PT S2
	AOX1	0	0	0.62977	0.427	0.032	PT S2
	RASSF4	0	0	0.628346	0.479	0.089	PT S2
	BNIP3L	0	0	0.639038	0.501	0.115	PT S2
	CDH2	0	0	0.623548	0.472	0.078	PT S2
	AC004053.1	0	0	0.993573	0.432	0.044	PT S2
	AC113414.1	0	0	0.636647	0.486	0.104	PT S2
	HAO2	0	0	0.56739	0.408	0.026	PT S2
	MLXIPL	0	0	0.567616	0.434	0.055	PT S2
	LINC01788	0	0	0.696016	0.429	0.052	PT S2
	CYP4F3	0	0	0.533362	0.414	0.034	PT S2
	ABCC2	0	0	0.533212	0.42	0.047	PT S2
	GLYATL1	0	0	0.633361	0.417	0.049	PT S2
	SLC66A2	0	0	0.607315	0.442	0.079	PT S2
	TRPV4	0	0	0.556282	0.451	0.086	PT S2
	MAPT	0	0	0.576691	0.412	0.046	PT S2
	POR	0	0	0.699749	0.432	0.072	PT S2
	ACSS2	0	0	0.528185	0.459	0.095	PT S2
	ABLIM3	0	0	0.599827	0.398	0.038	PT S2
	SORCS1	0	0	0.983324	0.403	0.046	PT S2
	CYP4A22-AS1	0	0	0.716798	0.375	0.028	PT S2
	KHDRBS2	0	0	0.507767	0.455	0.099	PT S2
	IL6R	0	0	0.604462	0.422	0.081	PT S2
	GGT1.1	0	0	0.51311	0.384	0.039	PT S2
	AC026803.3	0	0	0.501673	0.378	0.035	PT S2
	DHTKD1	0	0	0.53825	0.429	0.091	PT S2
	LINC02220	0	0	0.650868	0.369	0.028	PT S2
	HGD	0	0	0.480738	0.416	0.079	PT S2
	SLC22A8	0	0	0.549852	0.371	0.032	PT S2
	SLC47A2	0	0	0.545507	0.38	0.046	PT S2
	ABHD6	0	0	0.50991	0.394	0.062	PT S2
	AL358232.2	0	0	0.561963	0.386	0.054	PT S2
	DGKB	0	0	0.593617	0.362	0.034	PT S2
	LINC01277	0	0	0.545096	0.371	0.045	PT S2
	CDH6	0	0	0.419166	0.422	0.085	PT S2
	EYA2	0	0	0.565017	0.403	0.078	PT S2
	AGMO	0	0	0.530486	0.386	0.065	PT S2
	ALDH6A1	0	0	0.484838	0.365	0.05	PT S2
	CUBN	0	0	2.65661	0.982	0.164	PT S3
	ANKS1B	0	0	2.1229	0.896	0.096	PT S3
	LRP2	0	0	2.15813	0.938	0.136	PT S3
	FGGY	0	0	1.77432	0.926	0.244	PT S3
	SYNE2	0	0	1.95907	0.983	0.623	PT S3
	ACSM2A	0	0	1.97044	0.926	0.132	PT S3
	SLC28A1	0	0	1.50621	0.847	0.08	PT S3
	LINC00671	0	0	1.39999	0.829	0.081	PT S3
	ACSM2B	0	0	1.76801	0.878	0.117	PT S3
	CLDN10	0	0	1.61397	0.856	0.182	PT S3
	PDZD2	0	0	1.6827	0.87	0.149	PT S3
	TRPM3	0	0	1.54715	0.887	0.203	PT S3
	GRAMD1B	0	0	1.54092	0.818	0.129	PT S3
	SLC2A9	0	0	1.8073	0.807	0.139	PT S3
	INSR	0	0	1.33874	0.853	0.247	PT S3
	MSRA	0	0	1.39489	0.834	0.202	PT S3
	NLGN1	0	0	1.55884	0.851	0.2	PT S3
	AGXT2	0	0	1.20326	0.761	0.074	PT S3
	TINAG	0	0	1.3521	0.78	0.106	PT S3
	FRMD4B	0	0	1.3387	0.833	0.21	PT S3
	SUGCT	0	0	1.31728	0.815	0.189	PT S3
	RAB11FIP3	0	0	1.34748	0.835	0.231	PT S3
	SLC13A3	0	0	1.54222	0.771	0.094	PT S3
	ZNF804B	0	0	1.61768	0.741	0.074	PT S3
	SLC16A9	0	0	1.36913	0.766	0.095	PT S3
	EBNA1BP2	0	0	1.26796	0.729	0.074	PT S3
	FARP1	0	0	1.25984	0.888	0.423	PT S3
	AC003044.1	0	0	1.64598	0.735	0.08	PT S3
	CUX1	0	0	1.15427	0.891	0.407	PT S3
	RMST	0	0	1.30638	0.741	0.093	PT S3
	ADAMTS9-AS1	0	0	1.24781	0.796	0.196	PT S3
	SLC17A1	0	0	1.27291	0.762	0.112	PT S3
	GLYAT	0	0	1.11573	0.725	0.09	PT S3
	AC007364.1	0	0	1.25744	0.735	0.116	PT S3
	CDH9	0	0	1.3879	0.693	0.068	PT S3
	SMIM2-AS1	0	0	1.2226	0.702	0.082	PT S3
	CNTN4	0	0	1.18137	0.768	0.18	PT S3
	NCKAP5	0	0	1.06618	0.763	0.175	PT S3
	SLC13A1	0	0	1.47339	0.699	0.086	PT S3
	XYLB	0	0	1.04442	0.683	0.083	PT S3
	PDZK1	0	0	0.97936	0.699	0.115	PT S3
	L3MBTL4	0	0	1.08537	0.793	0.247	PT S3
	CRYL1	0	0	1.04519	0.732	0.186	PT S3
	AK4	0	0	1.05831	0.663	0.079	PT S3
	SLC5A10	0	0	1.03405	0.624	0.04	PT S3
	SLC27A2	0	0	1.14218	0.632	0.057	PT S3
	SLC6A13	0	0	0.96673	0.631	0.055	PT S3
	HNF1A-AS1	0	0	1.06039	0.758	0.248	PT S3
	AC098829.1	0	0	1.70527	0.625	0.066	PT S3
	MAP3K13	0	0	1.06365	0.723	0.197	PT S3
	RNF152	0	0	1.31904	0.712	0.175	PT S3
	ACSF2	0	0	1.07112	0.646	0.088	PT S3
	LINC02532	0	0	0.944777	0.79	0.292	PT S3
	TRABD2B	0	0	1.18662	0.744	0.242	PT S3
	ACMSD	0	0	0.96321	0.634	0.086	PT S3
	PTER	0	0	1.10862	0.626	0.096	PT S3
	SLC22A7	0	0	1.11988	0.58	0.028	PT S3
	BHMT2	0	0	0.898899	0.698	0.17	PT S3
	PPARA	0	0	0.937655	0.717	0.215	PT S3
	BHMT	0	0	1.09613	0.625	0.082	PT S3
	DPYS	0	0	0.853523	0.63	0.081	PT S3
	SLC5A12	0	0	1.11538	0.645	0.094	PT S3
	AL589669.1	0	0	0.991128	0.635	0.094	PT S3
	SLC30A8	0	0	1.32628	0.561	0.023	PT S3
	LINC02336	0	0	1.85585	0.558	0.028	PT S3
	EHHADH	0	0	0.899518	0.622	0.105	PT S3
	EYA2	0	0	0.935949	0.591	0.075	PT S3
	SLC16A12	0	0	1.06076	0.714	0.21	PT S3
	CDHR3	0	0	0.931231	0.623	0.123	PT S3
	CLIC4	0	0	0.93672	0.641	0.135	PT S3
	AC087482.1	0	0	0.871979	0.558	0.045	PT S3
	ANPEP	0	0	0.852092	0.576	0.064	PT S3
	DAB2	0	0	0.775707	0.677	0.17	PT S3
	KCNJ15	0	0	1.22567	0.65	0.145	PT S3
	SLC5A11	0	0	0.9198	0.528	0.018	PT S3
	ABCC3	0	0	0.900184	0.562	0.061	PT S3
	PLG	0	0	1.11288	0.549	0.048	PT S3
	PTPRD	0	0	0.772499	0.665	0.141	PT S3
	KIAA1549	0	0	0.807525	0.578	0.091	PT S3
	PRUNE2	0	0	0.893825	0.599	0.106	PT S3
	AC034195.1	0	0	0.994944	0.601	0.129	PT S3
	BBOX1	0	0	0.906024	0.584	0.107	PT S3
	TMEM246-AS1	0	0	0.986405	0.52	0.042	PT S3
	MLXIPL	0	0	0.77318	0.528	0.054	PT S3
	LINC01020	0	0	0.928917	0.524	0.046	PT S3
	ENPP6	0	0	0.857668	0.504	0.028	PT S3
	AFMID	0	0	0.783464	0.558	0.092	PT S3
	ENPEP	0	0	0.863396	0.577	0.1	PT S3
	HPN	0	0	0.768207	0.622	0.174	PT S3
	RHOBTB1	0	0	0.921249	0.585	0.114	PT S3
	AC108519.1	0	0	0.83864	0.601	0.152	PT S3
	FMO5	0	0	0.825187	0.517	0.055	PT S3
	ARSB	0	0	1.09434	0.567	0.118	PT S3
	PCK1	0	0	0.826299	0.524	0.062	PT S3
	AL078590.2	0	0	0.991102	0.48	0.022	PT S3
	AC098588.3	0	0	0.81088	0.535	0.072	PT S3
	CYP4A11	0	0	0.75326	0.491	0.036	PT S3
	NQO2	0	0	0.722842	0.533	0.087	PT S3
	FUT6	0	0	0.704588	0.492	0.042	PT S3
	HNF4A	0	0	0.703306	0.5	0.051	PT S3
	MIOX	0	0	0.844302	0.486	0.042	PT S3
	LINC01515	0	0	0.874325	0.559	0.133	PT S3
	SLC22A24	0	0	0.762937	0.463	0.019	PT S3
	SLC47A1	0	0	0.713172	0.538	0.097	PT S3
	ARHGAP42	0	0	0.724063	0.541	0.108	PT S3
	EPHX2	0	0	0.676978	0.556	0.136	PT S3
	SLC1A1	0	0	0.733115	0.544	0.119	PT S3
	PLEKHA6	0	0	0.708517	0.547	0.134	PT S3
	SEMA5A	0	0	0.883565	0.539	0.116	PT S3
	LINC02027	0	0	0.703994	0.503	0.074	PT S3
	MME	0	0	0.645602	0.528	0.087	PT S3
	DIO1	0	0	0.650593	0.443	0.022	PT S3
	Z93403.1	0	0	0.835841	0.499	0.082	PT S3
	SLC22A6	0	0	0.926015	0.479	0.065	PT S3
	PRLR	0	0	0.767861	0.514	0.108	PT S3
	AC128707.1	0	0	0.760863	0.434	0.021	PT S3
	SLC7A13	0	0	1.14378	0.417	0.004	PT S3
	RGL1	0	0	0.59182	0.527	0.114	PT S3
	AC087762.1	0	0	0.748351	0.482	0.069	PT S3
	GGT1.1	0	0	0.670526	0.441	0.039	PT S3
	P4HA2	0	0	0.608246	0.447	0.046	PT S3
	GLYATL1	0	0	0.664781	0.45	0.05	PT S3
	ERRFI1	0	0	0.956582	0.496	0.104	PT S3
	ALPK2	0	0	0.651613	0.444	0.044	PT S3
	ACY1	0	0	0.635629	0.434	0.037	PT S3
	HGD	0	0	0.626195	0.47	0.079	PT S3
	AC004485.1	0	0	0.750471	0.443	0.048	PT S3
	ARSF	0	0	0.661039	0.405	0.013	PT S3
	ABCC6	0	0	0.55762	0.461	0.071	PT S3
	ACSS2	0	0	0.647997	0.48	0.096	PT S3
	DPF3	0	0	0.593333	0.44	0.05	PT S3
	ATP8B4	0	0	0.680759	0.487	0.096	PT S3
	TRPV4	0	0	0.553306	0.471	0.087	PT S3
	DHTKD1	0	0	0.590891	0.472	0.091	PT S3
	AOX1	0	0	0.691966	0.414	0.034	PT S3
	SHMT1	0	0	0.562167	0.464	0.085	PT S3
	KCNK5	0	0	0.735717	0.432	0.053	PT S3
	CDH6	0	0	0.558859	0.474	0.085	PT S3
	IL6R	0	0	0.635408	0.453	0.081	PT S3
	MOGAT1	0	0	0.638894	0.389	0.014	PT S3
	FTCD	0	0	0.619998	0.426	0.055	PT S3
	ASPA	0	0	0.568518	0.427	0.059	PT S3
	RASSF4	0	0	0.587227	0.456	0.091	PT S3
	GLIS1	0	0	0.537529	0.437	0.067	PT S3
	TTC38	0	0	0.537887	0.446	0.085	PT S3
	HAO2	0	0	0.584323	0.387	0.028	PT S3
	HECW1	0	0	0.578863	0.422	0.061	PT S3
	COL19A1	0	0	0.585987	0.42	0.059	PT S3
	UPB1	0	0	0.575131	0.405	0.047	PT S3
	SLC6A12	0	0	0.572859	0.391	0.036	PT S3
	ALDH6A1	0	0	0.550658	0.398	0.05	PT S3
	LINC01517	0	0	0.579653	0.353	0.009	PT S3
	DGKB	0	0	0.670555	0.371	0.035	PT S3
	LINC02147	0	0	0.80003	0.393	0.059	PT S3
	CPNE4	0	0	0.652974	0.361	0.029	PT S3
	POR	0	0	0.632171	0.4	0.074	PT S3
	PEPD	0	0	0.453856	0.398	0.072	PT S3
	AC104170.1	0	0	0.558395	0.349	0.025	PT S3
	MYO7B	0	0	0.477891	0.347	0.034	PT S3
	TNNI3K	0	0	0.616957	0.339	0.028	PT S3
	OPCML	0	0	0.611685	0.34	0.028	PT S3
	ABHD6	0	0	0.494923	0.372	0.064	PT S3
	AC018467.1	0	0	0.644045	0.36	0.055	PT S3
	SLC22A11	0	0	0.453923	0.331	0.028	PT S3
	G6PC	0	0	0.585608	0.337	0.035	PT S3
	AL049629.1	0	0	0.510889	0.315	0.017	PT S3
	CAPN12	0	0	0.450459	0.333	0.035	PT S3
	SLC23A3	0	0	0.471886	0.317	0.019	PT S3
	CSMD1	0	0	0.498638	0.327	0.031	PT S3
	NHEJ1	0	0	0.530456	0.337	0.044	PT S3
	AL117382.1	0	0	0.456187	0.308	0.014	PT S3
	SLC5A8	0	0	0.74299	0.3	0.01	PT S3
	NUGGC	0	0	0.462963	0.314	0.024	PT S3
	LINC02275	0	0	0.455865	0.326	0.042	PT S3
	ADORA2A-AS1	0	0	0.444252	0.315	0.032	PT S3
	MGAM	0	0	0.443717	0.333	0.05	PT S3
	SLC22A12	0	0	0.413024	0.301	0.021	PT S3
	PC	0	0	0.432443	0.306	0.028	PT S3
	MAPT	0	0	0.47399	0.327	0.049	PT S3
	ABCC2	0	0	0.42778	0.328	0.05	PT S3
	SERPINF2	0	0	0.424021	0.297	0.025	PT S3
	NOL4	0	0	0.449296	0.289	0.016	PT S3
	BAIAP2	0	0	0.433379	0.317	0.047	PT S3
	RUNDC3B	0	0	0.423127	0.306	0.036	PT S3
	DRAIC	0	0	0.493153	0.303	0.035	PT S3
	AL591519.1	0	0	0.477693	0.312	0.044	PT S3
	LINC01510	0	0	0.39999	0.289	0.022	PT S3
	SORD	0	0	0.405967	0.301	0.039	PT S3
	A1CF	0	0	0.398541	0.296	0.034	PT S3
	AC026803.3	0	0	0.378478	0.299	0.038	PT S3
	USH1C	0	0	0.38368	0.302	0.042	PT S3
	GPM6A	0	0	0.533257	0.301	0.038	PT S3
	AFM	0	0	0.498688	0.297	0.038	PT S3
	AC111000.4	0	0	0.406043	0.295	0.041	PT S3
	SPAG5	0	0	0.382213	0.272	0.019	PT S3
	F11-AS1	0	0	0.534504	0.285	0.034	PT S3
	ALDH8A1	0	0	0.376159	0.286	0.037	PT S3
	AL353576.1	0	0	0.44133	0.262	0.013	PT S3
	KCNH6	0	0	0.409786	0.261	0.014	PT S3
	PNPLA3	0	0	0.371408	0.265	0.02	PT S3
	SLC12A1	0	0	2.02279	0.99	0.195	cTAL1
	CASR	0	0	1.57541	0.919	0.191	cTAL1
	CACNA2D3	0	0	1.50797	0.93	0.258	cTAL1
	PDE1A	0	0	1.65347	0.928	0.247	cTAL1
	CCSER1	0	0	1.50309	0.99	0.601	cTAL1
	UMOD	0	0	1.52412	0.842	0.134	cTAL1
	ERBB4	0	0	1.45964	0.983	0.481	cTAL1
	PLCB1	0	0	1.28812	0.963	0.326	cTAL1
	ARHGAP6	0	0	1.47146	0.923	0.388	cTAL1
	ESRRG	0	0	1.22457	0.995	0.632	cTAL1
	CGNL1	0	0	1.38271	0.874	0.301	cTAL1
	GPC5	0	0	1.72915	0.839	0.214	cTAL1
	MECOM	0	0	1.24088	0.986	0.475	cTAL1
	HIP1	0	0	1.25425	0.826	0.255	cTAL1
	PCDH9	0	0	1.37391	0.796	0.196	cTAL1
	PRKD1	0	0	1.34789	0.851	0.32	cTAL1
	NR2F2-AS1	0	0	0.96362	0.86	0.307	cTAL1
	ATP1B1	0	0	1.01633	0.875	0.342	cTAL1
	CLDN16	0	0	1.08964	0.622	0.045	cTAL1
	CLCN5	0	0	1.0046	0.792	0.258	cTAL1
	PTH2R	0	0	0.894549	0.964	0.489	cTAL1
	ESRRB	0	0	0.972475	0.713	0.144	cTAL1
	KNG1	0	0	0.921482	0.679	0.117	cTAL1
	PTGER3	0	0	1.00208	0.762	0.207	cTAL1
	PLCL1	0	0	1.14199	0.901	0.45	cTAL1
	HS6ST2	0	0	1.10323	0.661	0.112	cTAL1
	STK32B	0	0	0.932513	0.708	0.186	cTAL1
	EGF	0	0	1.28893	0.731	0.193	cTAL1
	LINC01762	0	0	0.96313	0.688	0.18	cTAL1
	RBFOX1	0	0	1.14873	0.639	0.131	cTAL1
	RP1	0	0	1.00018	0.605	0.104	cTAL1
	ENOX1	0	0	1.38498	0.587	0.103	cTAL1
	MAGI1	0	0	0.557954	0.917	0.506	cTAL1
	NAALADL2	0	0	0.755162	0.881	0.427	cTAL1
	CPEB3	0	0	0.820503	0.73	0.281	cTAL1
	NELL1	0	0	0.921814	0.6	0.125	cTAL1
	SLC16A12	0	0	0.899595	0.677	0.201	cTAL1
	EFNA5	0	0	0.765003	0.777	0.283	cTAL1
	PKP4	0	0	0.786203	0.848	0.43	cTAL1
	SIM2	0	0	0.687504	0.609	0.13	cTAL1
	FGF14	0	0	1.21062	0.521	0.06	cTAL1
	KAZN	0	0	0.697469	0.835	0.36	cTAL1
	TMEM52B	0	0	0.873914	0.542	0.073	cTAL1
	NAV2	0	0	0.866179	0.646	0.199	cTAL1
	ATP1A1	0	0	0.762772	0.744	0.3	cTAL1
	PPM1L	0	0	0.921639	0.617	0.178	cTAL1
	UGT8	0	0	0.71982	0.607	0.158	cTAL1
	LRP1B	0	0	0.849008	0.653	0.208	cTAL1
	LINC01606	0	0	0.75625	0.608	0.163	cTAL1
	RANBP3L	0	0	0.732514	0.563	0.121	cTAL1
	SGIP1	0	0	0.645617	0.617	0.166	cTAL1
	CCDC148	0	0	0.744256	0.644	0.218	cTAL1
	FREM1	0	0	0.61756	0.635	0.205	cTAL1
	AC138305.1	0	0	0.853539	0.619	0.198	cTAL1
	LINC00970	0	0	0.787216	0.558	0.138	cTAL1
	LMO7	0	0	0.747674	0.678	0.277	cTAL1
	DACH1	0	0	0.696241	0.632	0.2	cTAL1
	KCTD1	0	0	0.685825	0.608	0.195	cTAL1
	KLHL13	0	0	0.665489	0.649	0.229	cTAL1
	TENM4	0	0	0.714166	0.525	0.118	cTAL1
	NRK	0	0	0.667266	0.516	0.107	cTAL1
	RNF150	0	0	0.690382	0.606	0.204	cTAL1
	CA12	0	0	0.546619	0.687	0.263	cTAL1
	SLC5A3	0	0	0.672894	0.585	0.188	cTAL1
	GP2	0	0	0.682298	0.468	0.059	cTAL1
	TMEM207	0	0	0.779196	0.412	0.003	cTAL1
	AL159156.1	0	0	0.785284	0.489	0.086	cTAL1
	FAM184A	0	0	0.587738	0.519	0.119	cTAL1
	AC068631.1	0	0	0.620392	0.473	0.073	cTAL1
	MYO3B	0	0	0.674525	0.567	0.177	cTAL1
	SGK2	0	0	0.560791	0.556	0.167	cTAL1
	MRPS6	0	0	0.663162	0.574	0.194	cTAL1
	EFHD1	0	0	0.628923	0.535	0.152	cTAL1
	PDE10A	0	0	1.06793	0.576	0.223	cTAL1
	PRICKLE2	0	0	0.683619	0.597	0.234	cTAL1
	CADM1	0	0	0.617235	0.567	0.181	cTAL1
	ANK2	0	0	0.563218	0.579	0.194	cTAL1
	TMEM72	0	0	0.524414	0.499	0.121	cTAL1
	ACACB	0	0	0.554615	0.593	0.224	cTAL1
	CPM	0	0	0.545779	0.564	0.188	cTAL1
	NUDT4	0	0	0.602526	0.495	0.131	cTAL1
	SCN7A	0	0	0.772905	0.46	0.098	cTAL1
	NOS1AP	0	0	0.582876	0.547	0.185	cTAL1
	AC124017.1	0	0	0.721963	0.403	0.044	cTAL1
	AC138123.1	0	0	0.631845	0.481	0.13	cTAL1
	ZNF385B	0	0	0.524346	0.474	0.126	cTAL1
	SUSD4	0	0	0.521663	0.453	0.105	cTAL1
	LNX1	0	0	0.505572	0.494	0.148	cTAL1
	ZNF385D	0	0	0.577226	0.444	0.097	cTAL1
	GNAI1	0	0	0.549595	0.484	0.144	cTAL1
	STK32A	0	0	0.524559	0.398	0.064	cTAL1
	PHF21B	0	0	0.48729	0.389	0.056	cTAL1
	KCNJ1	0	0	0.503479	0.432	0.103	cTAL1
	DENND2A	0	0	0.516695	0.423	0.093	cTAL1
	PANTR1	0	0	0.50714	0.46	0.141	cTAL1
	AL139383.1	0	0	0.483243	0.422	0.101	cTAL1
	MALRD1	0	0	0.507387	0.399	0.09	cTAL1
	PXDNL	0	0	0.566324	0.366	0.063	cTAL1
	LINC02343	0	0	0.562555	0.427	0.121	cTAL1
	AC087564.1	0	0	0.536435	0.424	0.124	cTAL1
	MFSD4A	0	0	0.46601	0.373	0.074	cTAL1
	CLCNKB	0	0	0.413817	0.387	0.088	cTAL1
	SEMA6D	0	0	0.428624	0.387	0.104	cTAL1
	FGF9	0	0	0.408023	0.375	0.096	cTAL1
	SCHLAP1	0	0	0.546839	0.367	0.088	cTAL1
	SLC9A3	0	0	0.398834	0.348	0.072	cTAL1
	AL031073.2	0	0	0.7407	0.315	0.043	cTAL1
	NPSR1-AS1	0	0	0.628647	0.349	0.078	cTAL1
	NTRK2	0	0	0.415615	0.341	0.068	cTAL1
	KCNN3	0	0	0.387739	0.296	0.041	cTAL1
	TFAP2B	0	0	0.351341	0.315	0.07	cTAL1
	JAG1	0	0	0.37222	0.298	0.053	cTAL1
	WNK4	0	0	0.346074	0.32	0.074	cTAL1
	CLDN14	0	0	0.311583	0.267	0.049	cTAL1
	DUSP9	0	0	0.30408	0.247	0.032	cTAL1
	AP000282.1	0	0	0.358241	0.245	0.033	cTAL1
	GAD1	0	0	0.325613	0.248	0.04	cTAL1
	COL8A1	0	0	0.644797	0.238	0.034	cTAL1
	AL050403.2	0	0	0.335675	0.222	0.026	cTAL1
	NPY1R	0	0	0.317247	0.218	0.026	cTAL1
	AC093523.1	0	0	0.334437	0.199	0.015	cTAL1
	AC090709.1	0	0	0.298166	0.203	0.028	cTAL1
	ZNF503	0	0	0.239205	0.192	0.027	cTAL1
	NKAIN2	0	0	0.377302	0.152	0.01	cTAL1
	KCNJ10	0	0	0.202846	0.144	0.01	cTAL1
	F11	4.52137e-308	1.19382e-303	0.281963	0.245	0.046	cTAL1
	FXYD2	1.82232e-303	4.81164e-299	0.539889	0.547	0.198	cTAL1
	CA10	4.47828e-303	1.18245e-298	0.457981	0.411	0.116	cTAL1
	CLCNKA	1.54419e-301	4.07727e-297	0.351475	0.309	0.072	cTAL1
	ST6GALNAC5	3.80559e-301	1.00483e-296	0.202419	0.133	0.014	cTAL1
	AC105384.1	5.47242e-301	1.44494e-296	0.175653	0.124	0.012	cTAL1
	SLC25A33	5.37686e-299	1.41971e-294	0.440611	0.343	0.089	cTAL1
	LINC00645	1.67889e-298	4.43294e-294	0.350112	0.326	0.079	cTAL1
	GUCY1A1	3.52822e-296	9.3159e-292	0.416489	0.38	0.105	cTAL1
	ADAMTS17	4.15551e-295	1.09722e-290	0.45214	0.38	0.104	cTAL1
	AK3	2.82963e-292	7.47136e-288	0.514494	0.588	0.228	cTAL1
	HIBADH	3.59003e-292	9.47911e-288	0.626522	0.617	0.259	cTAL1
	GRIK2	2.48947e-291	6.5732e-287	0.357403	0.233	0.044	cTAL1
	WDFY2	3.45344e-290	9.11847e-286	0.6895	0.627	0.266	cTAL1
	BICDL1	6.17045e-288	1.62925e-283	0.641455	0.614	0.25	cTAL1
	ADGRV1	2.8063e-284	7.40977e-280	0.398971	0.373	0.105	cTAL1
	LINC01182	5.18889e-284	1.37007e-279	0.435862	0.372	0.103	cTAL1
	ARFGEF3	4.32499e-279	1.14197e-274	0.305488	0.241	0.049	cTAL1
	PLEKHH2	7.45047e-277	1.96722e-272	0.415378	0.458	0.15	cTAL1
	AC012409.2	9.83442e-277	2.59668e-272	0.395851	0.392	0.116	cTAL1
	RALYL	2.57741e-276	6.80539e-272	0.419584	0.537	0.183	cTAL1
	GNG7	1.03503e-274	2.73291e-270	0.445723	0.384	0.112	cTAL1
	LAMA1	1.21711e-273	3.21365e-269	0.374567	0.359	0.1	cTAL1
	AC040174.1	5.57489e-272	1.47199e-267	0.412479	0.368	0.105	cTAL1
	SIM1	2.54018e-270	6.70709e-266	0.453411	0.477	0.164	cTAL1
	MROH7	5.34414e-265	1.41107e-260	0.390014	0.363	0.105	cTAL1
	USP2	2.02893e-262	5.35718e-258	0.296047	0.262	0.059	cTAL1
	TMEM45B	1.67085e-260	4.41172e-256	0.276765	0.23	0.047	cTAL1
	CACNB4	2.14949e-257	5.6755e-253	0.438731	0.382	0.113	cTAL1
	CMTM4	5.81683e-257	1.53588e-252	0.43839	0.435	0.147	cTAL1
	RHOBTB3	1.89202e-255	4.99569e-251	0.64269	0.576	0.239	cTAL1
	TSPAN8	6.29072e-254	1.661e-249	0.219121	0.174	0.029	cTAL1
	PRDM16	7.94722e-254	2.09838e-249	0.396794	0.437	0.146	cTAL1
	CYFIP2	4.78165e-253	1.26255e-248	0.617349	0.671	0.313	cTAL1
	PPARGC1A	1.18733e-251	3.13504e-247	0.559211	0.656	0.291	cTAL1
	AC104596.1	4.14766e-251	1.09515e-246	0.398423	0.32	0.087	cTAL1
	PLPPR1	1.82978e-250	4.83136e-246	0.391519	0.422	0.137	cTAL1
	AGBL4	2.3673e-248	6.25061e-244	0.524673	0.643	0.273	cTAL1
	AL356737.2	2.47409e-248	6.53259e-244	0.241341	0.197	0.037	cTAL1
	RAP2C	2.14913e-247	5.67457e-243	0.29332	0.259	0.061	cTAL1
	USP53	2.86622e-246	7.56796e-242	0.640204	0.632	0.297	cTAL1
	SLC4A7	2.20072e-245	5.81077e-241	0.665311	0.6	0.262	cTAL1
	PPP2R3A	5.64293e-245	1.48996e-240	0.545245	0.756	0.368	cTAL1
	ZHX3	3.5464e-243	9.3639e-239	0.536551	0.581	0.247	cTAL1
	DNAH14	2.59555e-242	6.85328e-238	0.547552	0.633	0.284	cTAL1
	PROX1	1.68644e-240	4.45289e-236	0.245529	0.187	0.034	cTAL1
	ADAMTS9-AS2	4.88368e-239	1.28949e-234	0.535229	0.803	0.381	cTAL1
	MPC1	1.13984e-238	3.00964e-234	0.408813	0.44	0.155	cTAL1
	MTMR7	2.85086e-238	7.5274e-234	0.18548	0.143	0.021	cTAL1
	DNM3	1.35658e-236	3.58191e-232	0.384442	0.468	0.166	cTAL1
	MAST4	1.39598e-235	3.68594e-231	0.547753	0.78	0.382	cTAL1
	LINC01725	2.66899e-235	7.04721e-231	0.515811	0.511	0.201	cTAL1
	DANT2	6.95059e-235	1.83523e-230	0.58	0.776	0.398	cTAL1
	GCGR	2.61055e-234	6.89289e-230	0.22791	0.198	0.039	cTAL1
	RADX	2.16248e-233	5.7098e-229	0.188895	0.146	0.022	cTAL1
	STXBP4	6.00217e-233	1.58481e-228	0.46558	0.489	0.188	cTAL1
	ZNF98	1.40722e-231	3.71562e-227	0.370645	0.326	0.095	cTAL1
	PCCA	3.0502e-231	8.05376e-227	0.57817	0.815	0.482	cTAL1
	ITGA2	3.21633e-230	8.49239e-226	0.41611	0.467	0.173	cTAL1
	GALNT18	2.41688e-228	6.38154e-224	0.492249	0.541	0.222	cTAL1
	CECR2	2.63599e-227	6.96007e-223	0.360841	0.332	0.099	cTAL1
	FARP1	3.80082e-226	1.00357e-221	0.532777	0.795	0.418	cTAL1
	HMCN1	5.49591e-225	1.45114e-220	0.542845	0.302	0.086	cTAL1
	WNK1	6.42298e-225	1.69592e-220	0.674245	0.712	0.369	cTAL1
	MARK1	7.64778e-225	2.01932e-220	0.318867	0.272	0.071	cTAL1
	TFCP2L1	7.81631e-225	2.06382e-220	0.480667	0.661	0.3	cTAL1
	TAPT1-AS1	4.97623e-223	1.31392e-218	0.477446	0.541	0.23	cTAL1
	MAPK4	7.67672e-222	2.02696e-217	0.327958	0.252	0.063	cTAL1
	CFAP70	1.18826e-221	3.13749e-217	0.342973	0.351	0.111	cTAL1
	GABARAPL1	4.36495e-221	1.15252e-216	0.305185	0.282	0.077	cTAL1
	DEPTOR	1.16643e-220	3.07984e-216	0.512719	0.517	0.209	cTAL1
	MSI2	7.39264e-220	1.95195e-215	0.57311	0.868	0.53	cTAL1
	ARHGEF38	8.81385e-219	2.32721e-214	0.388313	0.442	0.159	cTAL1
	LINC02437	1.10785e-217	2.92517e-213	0.167365	0.14	0.022	cTAL1
	FGD4	1.84878e-216	4.88152e-212	0.545415	0.786	0.425	cTAL1
	SLC12A1	0	0	2.57455	0.992	0.179	cTAL2
	GPC5	0	0	2.8037	0.968	0.194	cTAL2
	CCSER1	0	0	1.75198	0.996	0.593	cTAL2
	CACNA2D3	0	0	1.6255	0.947	0.244	cTAL2
	ERBB4	0	0	1.86012	0.993	0.471	cTAL2
	EGF	0	0	2.09304	0.896	0.173	cTAL2
	UMOD	0	0	1.67387	0.851	0.12	cTAL2
	ESRRG	0	0	1.47764	0.993	0.625	cTAL2
	THSD4	0	0	1.48548	0.781	0.129	cTAL2
	RBFOX1	0	0	1.6303	0.76	0.114	cTAL2
	ATP1B1	0	0	1.20333	0.892	0.331	cTAL2
	PDE1A	0	0	1.23872	0.88	0.237	cTAL2
	PLCB1	0	0	1.10981	0.944	0.315	cTAL2
	SGIP1	0	0	1.13757	0.762	0.149	cTAL2
	CLCN5	0	0	1.07274	0.809	0.247	cTAL2
	CGNL1	0	0	1.22882	0.839	0.292	cTAL2
	EFNA5	0	0	1.17471	0.846	0.269	cTAL2
	CASR	0	0	0.960568	0.802	0.185	cTAL2
	MECOM	0	0	1.05235	0.976	0.466	cTAL2
	LINC01606	0	0	1.10425	0.72	0.147	cTAL2
	AC092078.2	0	0	1.35114	0.62	0.027	cTAL2
	ENOX1	0	0	1.34246	0.669	0.089	cTAL2
	ESRRB	0	0	0.956841	0.711	0.133	cTAL2
	ARHGAP6	0	0	1.11359	0.874	0.381	cTAL2
	HIP1	0	0	1.06919	0.786	0.247	cTAL2
	PCDH9	0	0	1.22224	0.75	0.188	cTAL2
	KLHL13	0	0	1.02219	0.75	0.215	cTAL2
	LRP1B	0	0	1.09672	0.734	0.194	cTAL2
	PHACTR1	0	0	1.12762	0.677	0.141	cTAL2
	HS6ST2	0	0	1.09705	0.652	0.103	cTAL2
	CCDC148	0	0	1.01739	0.724	0.205	cTAL2
	AL159156.1	0	0	0.999446	0.613	0.07	cTAL2
	RHOBTB3	0	0	1.02982	0.727	0.223	cTAL2
	PKP4	0	0	0.932644	0.869	0.421	cTAL2
	PRKG1	0	0	0.847343	0.786	0.247	cTAL2
	CACNB2	0	0	1.03213	0.628	0.105	cTAL2
	RP1	0	0	1.17796	0.606	0.094	cTAL2
	LINC01762	0	0	1.00018	0.681	0.171	cTAL2
	PRKD1	0	0	0.955976	0.785	0.314	cTAL2
	PLCL1	0	0	0.995824	0.877	0.443	cTAL2
	CA10	0	0	0.895528	0.61	0.098	cTAL2
	CPEB3	0	0	0.852335	0.745	0.272	cTAL2
	DANT2	0	0	0.806501	0.842	0.386	cTAL2
	CLDN10-AS1	0	0	0.850821	0.598	0.097	cTAL2
	TBC1D4	0	0	0.814784	0.781	0.32	cTAL2
	NR2F2-AS1	0	0	0.775502	0.777	0.302	cTAL2
	CA12	0	0	0.721286	0.749	0.251	cTAL2
	NELL1	0	0	1.06774	0.602	0.116	cTAL2
	ADAMTS9-AS2	0	0	0.785839	0.845	0.371	cTAL2
	NAALADL2	0	0	0.788433	0.866	0.42	cTAL2
	PPARGC1A	0	0	0.797339	0.741	0.279	cTAL2
	SIM2	0	0	0.707532	0.616	0.121	cTAL2
	STK32B	0	0	0.798214	0.654	0.18	cTAL2
	AC138305.1	0	0	0.993277	0.657	0.188	cTAL2
	RANBP3L	0	0	0.849728	0.589	0.111	cTAL2
	LMO7	0	0	0.890609	0.701	0.268	cTAL2
	EFHD1	0	0	0.77515	0.606	0.141	cTAL2
	MAGI1	0	0	0.50355	0.902	0.5	cTAL2
	SLC16A12	0	0	0.849134	0.656	0.193	cTAL2
	ATP1A1	0	0	0.822078	0.719	0.293	cTAL2
	CCDC178	0	0	0.904747	0.571	0.126	cTAL2
	CALCR	0	0	0.909877	0.507	0.05	cTAL2
	GP2	0	0	0.710529	0.498	0.049	cTAL2
	NPSR1-AS1	0	0	0.987445	0.502	0.064	cTAL2
	TFCP2L1	0	0	0.648144	0.725	0.289	cTAL2
	LINC02343	0	0	0.900715	0.543	0.108	cTAL2
	MYO9A	0	0	0.623365	0.827	0.444	cTAL2
	IMMP2L	0	0	0.683238	0.954	0.747	cTAL2
	LINC00970	0	0	0.802722	0.557	0.13	cTAL2
	KNG1	0	0	0.633488	0.553	0.114	cTAL2
	KAZN	0	0	0.698153	0.782	0.355	cTAL2
	AK3	0	0	0.653169	0.63	0.219	cTAL2
	NRK	0	0	0.675265	0.522	0.099	cTAL2
	SCHLAP1	0	0	0.869857	0.493	0.075	cTAL2
	COBLL1	0	0	0.508273	0.895	0.481	cTAL2
	SEMA6D	0	0	0.6685	0.505	0.091	cTAL2
	UGT8	0	0	0.63906	0.564	0.152	cTAL2
	FAM184A	0	0	0.624428	0.522	0.111	cTAL2
	KCNIP4	0	0	0.581884	0.75	0.308	cTAL2
	SCD5	0	0	0.654246	0.508	0.112	cTAL2
	PRICKLE2	0	0	0.636865	0.611	0.226	cTAL2
	USP53	0	0	0.715681	0.649	0.29	cTAL2
	SUSD4	0	0	0.617683	0.489	0.096	cTAL2
	NHS	0	0	0.624218	0.704	0.311	cTAL2
	SHANK2	0	0	0.587697	0.651	0.274	cTAL2
	PPFIA2	0	0	0.714659	0.454	0.07	cTAL2
	OSBPL3	0	0	0.547203	0.688	0.306	cTAL2
	RALYL	0	0	0.531268	0.58	0.174	cTAL2
	ALDH1A2	0	0	0.647764	0.497	0.113	cTAL2
	THRB	0	0	0.592912	0.64	0.275	cTAL2
	MYO3B	0	0	0.597533	0.549	0.17	cTAL2
	GALNT18	0	0	0.606216	0.588	0.213	cTAL2
	PTGER3	0	0	0.547507	0.595	0.207	cTAL2
	SULT1C2	0	0	0.517954	0.543	0.184	cTAL2
	PPM1L	0	0	0.647647	0.53	0.175	cTAL2
	KCTD1	0	0	0.568855	0.547	0.191	cTAL2
	PBX1	0	0	0.494229	0.659	0.301	cTAL2
	DNAH14	0	0	0.565235	0.623	0.278	cTAL2
	FXYD2	0	0	0.500254	0.545	0.191	cTAL2
	PPM1E	0	0	0.670105	0.398	0.046	cTAL2
	TMEM72	0	0	0.499256	0.46	0.116	cTAL2
	CFAP221	0	0	0.493843	0.492	0.15	cTAL2
	DEPTOR	0	0	0.579532	0.539	0.202	cTAL2
	LINC01182	0	0	0.61284	0.433	0.094	cTAL2
	TRIM2	0	0	0.485275	0.55	0.212	cTAL2
	COL4A3	0	0	0.476469	0.616	0.268	cTAL2
	GNGT1	0	0	0.694074	0.428	0.091	cTAL2
	NTRK2	0	0	0.529755	0.4	0.06	cTAL2
	FAM171A1	0	0	0.500714	0.523	0.186	cTAL2
	NOS1	0	0	0.549243	0.385	0.047	cTAL2
	P3H2	0	0	0.581752	0.571	0.24	cTAL2
	HNF1A-AS1	0	0	0.511764	0.568	0.239	cTAL2
	ACACB	0	0	0.476993	0.547	0.22	cTAL2
	CREB3L2	0	0	0.516771	0.462	0.135	cTAL2
	LINC01725	0	0	0.541735	0.521	0.195	cTAL2
	KCNJ1	0	0	0.477247	0.425	0.098	cTAL2
	ACPP	0	0	0.568236	0.376	0.051	cTAL2
	PRDM16	0	0	0.482356	0.462	0.139	cTAL2
	DZIP1	0	0	0.470072	0.43	0.111	cTAL2
	CNTN1	0	0	0.565036	0.363	0.041	cTAL2
	AC040174.1	0	0	0.524616	0.416	0.097	cTAL2
	CXCL12	0	0	0.483022	0.353	0.037	cTAL2
	RALGPS1	0	0	0.452614	0.517	0.205	cTAL2
	PANTR1	0	0	0.488178	0.449	0.136	cTAL2
	FGF9	0	0	0.468918	0.401	0.089	cTAL2
	AZIN1-AS1	0	0	0.486233	0.425	0.123	cTAL2
	CECR2	0	0	0.472902	0.393	0.091	cTAL2
	CABP1	0	0	0.531859	0.311	0.012	cTAL2
	WNK4	0	0	0.439793	0.363	0.067	cTAL2
	MPC1	0	0	0.425334	0.441	0.15	cTAL2
	LNX1	0	0	0.408382	0.44	0.145	cTAL2
	TMEM72-AS1	0	0	0.523504	0.348	0.058	cTAL2
	FGF13	0	0	0.524112	0.465	0.169	cTAL2
	MALRD1	0	0	0.489309	0.373	0.086	cTAL2
	GUCY1A1	0	0	0.424103	0.386	0.099	cTAL2
	TFAP2B	0	0	0.420624	0.348	0.063	cTAL2
	PDE8B	0	0	0.446808	0.347	0.066	cTAL2
	LYPD6	0	0	0.479267	0.296	0.018	cTAL2
	ADAMTS17	0	0	0.45623	0.379	0.099	cTAL2
	ALDH1L1	0	0	0.426925	0.392	0.117	cTAL2
	DNASE1	0	0	0.407889	0.416	0.141	cTAL2
	TEX41	0	0	0.400079	0.404	0.115	cTAL2
	ATP6V0A4	0	0	0.388622	0.434	0.15	cTAL2
	MROH7	0	0	0.412829	0.373	0.1	cTAL2
	ACOT11	0	0	0.388839	0.402	0.131	cTAL2
	MAPK4	0	0	0.441098	0.323	0.055	cTAL2
	CHL1	0	0	0.384895	0.382	0.111	cTAL2
	GPI	0	0	0.383851	0.398	0.135	cTAL2
	AC024022.1	0	0	0.447652	0.322	0.061	cTAL2
	AC068631.1	0	0	0.38979	0.332	0.075	cTAL2
	KATNAL2	0	0	0.394361	0.366	0.114	cTAL2
	CLDN16	0	0	0.339066	0.306	0.053	cTAL2
	AL139383.1	0	0	0.383207	0.344	0.1	cTAL2
	ADGRV1	0	0	0.357887	0.346	0.101	cTAL2
	AC124017.1	0	0	0.474357	0.288	0.044	cTAL2
	AC009879.4	0	0	0.391097	0.304	0.061	cTAL2
	GPC5-AS2	0	0	0.355619	0.263	0.028	cTAL2
	RBM20	0	0	0.403868	0.278	0.043	cTAL2
	MTURN	0	0	0.32463	0.326	0.094	cTAL2
	PAPSS2	0	0	0.395748	0.29	0.061	cTAL2
	AC011246.1	0	0	0.894872	0.266	0.041	cTAL2
	ZNF98	0	0	0.418281	0.314	0.091	cTAL2
	SLC9A3	0	0	0.324691	0.295	0.07	cTAL2
	CLCNKB	0	0	0.335671	0.311	0.087	cTAL2
	NR2F1-AS1	0	0	0.330123	0.304	0.079	cTAL2
	LINC00645	0	0	0.310712	0.298	0.076	cTAL2
	AC009478.1	0	0	0.392762	0.256	0.04	cTAL2
	SLC15A2	0	0	0.307895	0.284	0.068	cTAL2
	IRX2	0	0	0.307296	0.239	0.024	cTAL2
	ABHD17C	0	0	0.315073	0.276	0.062	cTAL2
	AL356737.2	0	0	0.327331	0.245	0.031	cTAL2
	LINC02432	0	0	0.325325	0.247	0.034	cTAL2
	BRINP3	0	0	0.391492	0.252	0.044	cTAL2
	MFSD4A	0	0	0.298827	0.282	0.074	cTAL2
	ATP6V1B1	0	0	0.2906	0.272	0.068	cTAL2
	PHF21B	0	0	0.294546	0.261	0.058	cTAL2
	GRM1	0	0	0.31359	0.222	0.02	cTAL2
	AL022068.1	0	0	0.375245	0.25	0.049	cTAL2
	U91319.1	0	0	0.342055	0.256	0.059	cTAL2
	GABRB1	0	0	0.341776	0.219	0.023	cTAL2
	SLC22A3	0	0	0.317676	0.234	0.041	cTAL2
	LYPD6B	0	0	0.294177	0.238	0.047	cTAL2
	PKNOX2	0	0	0.289825	0.211	0.022	cTAL2
	SYTL4	0	0	0.275383	0.246	0.059	cTAL2
	FECH	0	0	0.280859	0.234	0.048	cTAL2
	MIR503HG	0	0	0.273487	0.23	0.044	cTAL2
	F11	0	0	0.259239	0.223	0.044	cTAL2
	SFRP1	0	0	0.293015	0.224	0.046	cTAL2
	BDKRB2	0	0	0.261583	0.202	0.036	cTAL2
	TMEM132C	0	0	0.412139	0.162	0.005	cTAL2
	ANKRD62P1-PARP4P3	0	0	0.221928	0.158	0.009	cTAL2
	MRAP2	0	0	0.225497	0.154	0.007	cTAL2
	SUCNR1	0	0	0.194928	0.142	0.018	cTAL2
	MTMR7	0	0	0.181189	0.141	0.019	cTAL2
	AC124852.1	0	0	0.189402	0.133	0.017	cTAL2
	AL358335.2	0	0	0.172716	0.12	0.014	cTAL2
	C16orf89	0	0	0.139293	0.106	0.011	cTAL2
	HCRTR2	0	0	0.163073	0.093	0.004	cTAL2
	AC092078.3	0	0	0.127372	0.096	0.008	cTAL2
	C14orf132	0	0	0.138609	0.094	0.007	cTAL2
	SLC12A1	0	0	2.44813	0.996	0.189	mTAL
	UMOD	0	0	1.93226	0.907	0.126	mTAL
	ESRRG	0	0	1.58174	0.996	0.63	mTAL
	PDE1A	0	0	1.68416	0.936	0.242	mTAL
	PLCB1	0	0	1.41778	0.967	0.321	mTAL
	EGF	0	0	2.01952	0.879	0.182	mTAL
	CACNA2D3	0	0	1.24675	0.921	0.254	mTAL
	ESRRB	0	0	1.28983	0.801	0.136	mTAL
	KAZN	0	0	1.18854	0.945	0.352	mTAL
	FOXP2	0	0	1.19978	0.81	0.165	mTAL
	PLCL1	0	0	1.4141	0.936	0.446	mTAL
	PTGER3	0	0	1.19672	0.817	0.2	mTAL
	SIM2	0	0	0.984652	0.744	0.12	mTAL
	CASR	0	0	1.0354	0.817	0.192	mTAL
	ANK2	0	0	1.07081	0.764	0.183	mTAL
	CADM1	0	0	1.01903	0.749	0.17	mTAL
	OXR1	0	0	1.06953	0.923	0.482	mTAL
	ATP1B1	0	0	0.990099	0.888	0.338	mTAL
	HIP1	0	0	1.12521	0.806	0.253	mTAL
	PTPN4	0	0	1.04191	0.835	0.334	mTAL
	LINC01762	0	0	1.06761	0.744	0.174	mTAL
	MAST4	0	0	0.968461	0.892	0.374	mTAL
	AL159156.1	0	0	0.984728	0.654	0.075	mTAL
	CLCN5	0	0	0.958278	0.792	0.255	mTAL
	ARHGAP6	0	0	1.04323	0.884	0.387	mTAL
	PKP4	0	0	1.03107	0.883	0.426	mTAL
	GPC5	0	0	1.4043	0.78	0.213	mTAL
	THSD7A	0	0	0.915461	0.827	0.307	mTAL
	BICDL1	0	0	0.993809	0.761	0.24	mTAL
	SLC5A3	0	0	0.879382	0.701	0.18	mTAL
	NR2F2-AS1	0	0	0.881878	0.814	0.306	mTAL
	SGIP1	0	0	0.872069	0.703	0.159	mTAL
	RNF150	0	0	0.974526	0.711	0.196	mTAL
	RANBP3L	0	0	0.929261	0.648	0.114	mTAL
	LINC02343	0	0	1.09478	0.637	0.108	mTAL
	NELL1	0	0	1.06572	0.651	0.119	mTAL
	RP1	0	0	0.973045	0.636	0.099	mTAL
	MRPS6	0	0	0.895566	0.691	0.185	mTAL
	MECOM	0	0	0.807637	0.977	0.472	mTAL
	NAALADL2	0	0	0.824571	0.895	0.424	mTAL
	CCSER1	0	0	0.851647	0.963	0.6	mTAL
	KIAA1217	0	0	0.821674	0.82	0.353	mTAL
	PPARGC1A	0	0	0.823725	0.767	0.284	mTAL
	ATP1A1	0	0	0.878073	0.774	0.296	mTAL
	RBFOX1	0	0	1.16791	0.631	0.128	mTAL
	EFNA5	0	0	0.832992	0.795	0.279	mTAL
	COBLL1	0	0	0.673964	0.93	0.484	mTAL
	ACACB	0	0	0.775906	0.685	0.217	mTAL
	LINC00970	0	0	0.889587	0.614	0.132	mTAL
	MYO3B	0	0	0.789584	0.649	0.17	mTAL
	UGT8	0	0	0.742953	0.634	0.154	mTAL
	STPG2	0	0	0.79062	0.658	0.203	mTAL
	PRDM16-DT	0	0	0.740247	0.543	0.076	mTAL
	LMO7	0	0	0.80501	0.713	0.273	mTAL
	NEBL	0	0	0.679248	0.702	0.238	mTAL
	OSBPL3	0	0	0.704015	0.749	0.308	mTAL
	CPEB3	0	0	0.739642	0.714	0.279	mTAL
	KIFC3	0	0	0.708035	0.669	0.23	mTAL
	RHOBTB3	0	0	0.773817	0.681	0.232	mTAL
	RAP1GAP	0	0	0.665427	0.527	0.074	mTAL
	TBC1D4	0	0	0.653505	0.763	0.326	mTAL
	PCDH9	0	0	1.13893	0.631	0.201	mTAL
	LAMA1	0	0	0.664728	0.533	0.089	mTAL
	CCDC148	0	0	0.760857	0.644	0.215	mTAL
	TRIM2	0	0	0.658221	0.641	0.211	mTAL
	SLC4A7	0	0	0.81683	0.672	0.256	mTAL
	GNAI1	0	0	0.696131	0.574	0.137	mTAL
	CYFIP2	0	0	0.75135	0.714	0.309	mTAL
	MFSD4A	0	0	0.731561	0.5	0.066	mTAL
	PANTR1	0	0	0.680035	0.566	0.134	mTAL
	KCNIP4	0	0	1.19823	0.727	0.314	mTAL
	MYO9A	0	0	0.630257	0.831	0.449	mTAL
	LINC01320	0	0	0.56289	0.774	0.314	mTAL
	STK32B	0	0	0.694035	0.619	0.187	mTAL
	CGNL1	0	0	0.659613	0.746	0.303	mTAL
	SLC16A12	0	0	0.651391	0.646	0.2	mTAL
	SOX6	0	0	0.625497	0.801	0.388	mTAL
	FARP1	0	0	0.618248	0.816	0.414	mTAL
	KCTD16	0	0	0.771951	0.5	0.077	mTAL
	AK3	0	0	0.60916	0.633	0.224	mTAL
	DOCK1	0	0	0.578788	0.754	0.359	mTAL
	PPM1L	0	0	0.771167	0.582	0.177	mTAL
	PRDM16	0	0	0.595395	0.55	0.138	mTAL
	NOS1AP	0	0	0.650905	0.591	0.18	mTAL
	CLCNKA	0	0	0.618818	0.472	0.062	mTAL
	CLDN10-AS1	0	0	0.661678	0.516	0.107	mTAL
	BMP6	0	0	0.751714	0.442	0.033	mTAL
	KNG1	0	0	0.604579	0.533	0.121	mTAL
	PLEKHH2	0	0	0.559119	0.537	0.144	mTAL
	SLC9A3	0	0	0.561979	0.452	0.065	mTAL
	ZHX3	0	0	0.606675	0.614	0.243	mTAL
	TAPT1-AS1	0	0	0.5648	0.6	0.225	mTAL
	NRCAM	0	0	0.591638	0.498	0.114	mTAL
	AC138123.1	0	0	0.666382	0.505	0.127	mTAL
	LIFR	0	0	0.542756	0.58	0.202	mTAL
	HS6ST2	0	0	0.696545	0.502	0.117	mTAL
	AC124017.1	0	0	0.680346	0.423	0.04	mTAL
	LNX1	0	0	0.53671	0.517	0.145	mTAL
	MPC1	0	0	0.527991	0.519	0.15	mTAL
	GALNT18	0	0	0.540797	0.594	0.217	mTAL
	TMEM72	0	0	0.505419	0.49	0.119	mTAL
	SGK2	0	0	0.534765	0.531	0.166	mTAL
	PRKX	0	0	0.590829	0.502	0.138	mTAL
	GP2	0	0	0.570029	0.427	0.058	mTAL
	RGS6	0	0	0.910885	0.408	0.046	mTAL
	KCTD1	0	0	0.555407	0.553	0.195	mTAL
	STXBP4	0	0	0.559073	0.537	0.184	mTAL
	MAL	0	0	0.552334	0.519	0.161	mTAL
	DENND2A	0	0	0.551151	0.449	0.09	mTAL
	FAM171A1	0	0	0.509374	0.543	0.189	mTAL
	PRKAA2	0	0	0.513047	0.523	0.175	mTAL
	NUDT4	0	0	0.541478	0.481	0.129	mTAL
	SEMA6D	0	0	0.593945	0.447	0.099	mTAL
	PLPPR1	0	0	0.497517	0.484	0.132	mTAL
	SCHLAP1	0	0	0.682499	0.431	0.084	mTAL
	RASSF8	0	0	0.574933	0.503	0.166	mTAL
	COL4A2	0	0	0.500786	0.548	0.204	mTAL
	PDE9A	0	0	0.481585	0.468	0.13	mTAL
	AC087564.1	0	0	0.623998	0.455	0.121	mTAL
	CFAP221	0	0	0.490592	0.487	0.154	mTAL
	AC079142.1	0	0	0.577958	0.503	0.18	mTAL
	ALDH1A2	0	0	0.588087	0.449	0.12	mTAL
	DMGDH	0	0	0.469274	0.512	0.182	mTAL
	CEP70	0	0	0.479239	0.485	0.161	mTAL
	AC092535.4	0	0	0.534643	0.417	0.097	mTAL
	SLC2A13	0	0	0.468462	0.501	0.176	mTAL
	DZIP1	0	0	0.472926	0.437	0.114	mTAL
	IDH2	0	0	0.484237	0.446	0.131	mTAL
	NRK	0	0	0.482425	0.429	0.109	mTAL
	KCNJ3	0	0	0.518804	0.482	0.165	mTAL
	AL139383.1	0	0	0.498495	0.416	0.099	mTAL
	DNASE1	0	0	0.436579	0.457	0.142	mTAL
	GRHL2	0	0	0.433386	0.45	0.14	mTAL
	KCNJ1	0	0	0.466411	0.412	0.102	mTAL
	DPH6-DT	0	0	0.520852	0.452	0.149	mTAL
	SCTR	0	0	0.534489	0.369	0.063	mTAL
	FGF9	0	0	0.446264	0.401	0.093	mTAL
	SUSD4	0	0	0.444222	0.412	0.104	mTAL
	ADGRV1	0	0	0.462419	0.404	0.101	mTAL
	CA10	0	0	0.491326	0.42	0.114	mTAL
	RPS6KA6	0	0	0.456707	0.415	0.119	mTAL
	GUCY1A1	0	0	0.438635	0.401	0.102	mTAL
	ARNT2	0	0	0.420613	0.438	0.141	mTAL
	TMEM72-AS1	0	0	0.502907	0.356	0.061	mTAL
	PROX1	0	0	0.476916	0.322	0.027	mTAL
	AC012409.2	0	0	0.431054	0.408	0.113	mTAL
	DNAJC11	0	0	0.432911	0.424	0.132	mTAL
	ZNF385D	0	0	0.449111	0.395	0.097	mTAL
	NTRK2	0	0	0.502834	0.358	0.066	mTAL
	MALRD1	0	0	0.468097	0.377	0.089	mTAL
	FAM184A	0	0	0.410969	0.405	0.122	mTAL
	GPC3	0	0	0.491518	0.323	0.046	mTAL
	PXDNL	0	0	0.514247	0.336	0.062	mTAL
	ADCY5	0	0	0.396663	0.319	0.05	mTAL
	AC090579.1	0	0	0.422631	0.364	0.1	mTAL
	ZNF98	0	0	0.459158	0.356	0.092	mTAL
	SYTL4	0	0	0.362529	0.321	0.057	mTAL
	FGF14	0	0	0.5896	0.327	0.067	mTAL
	VAT1L	0	0	0.523623	0.273	0.016	mTAL
	LINC00645	0	0	0.353745	0.329	0.077	mTAL
	AC104035.1	0	0	0.424669	0.286	0.038	mTAL
	WNK4	0	0	0.35183	0.318	0.073	mTAL
	LSAMP	0	0	0.318881	0.307	0.061	mTAL
	F11	0	0	0.342172	0.284	0.043	mTAL
	CLDN14	0	0	0.377183	0.286	0.046	mTAL
	AC016705.2	0	0	0.351827	0.303	0.066	mTAL
	ITGB1BP1	0	0	0.342504	0.318	0.08	mTAL
	AC068631.1	0	0	0.374688	0.316	0.079	mTAL
	VLDLR-AS1	0	0	0.378536	0.28	0.043	mTAL
	SHISA9	0	0	0.461575	0.295	0.059	mTAL
	FAM83B	0	0	0.341395	0.311	0.075	mTAL
	SYNDIG1	0	0	0.375697	0.297	0.062	mTAL
	LINC02432	0	0	0.385006	0.27	0.036	mTAL
	GOLM1	0	0	0.340506	0.304	0.071	mTAL
	ABHD17C	0	0	0.32907	0.296	0.063	mTAL
	AC078980.1	0	0	0.39122	0.279	0.047	mTAL
	IRS1	0	0	0.347347	0.276	0.054	mTAL
	AL357873.1	0	0	0.319576	0.255	0.034	mTAL
	SORCS2	0	0	0.310801	0.26	0.046	mTAL
	ARFGEF3	0	0	0.330527	0.257	0.047	mTAL
	LINC01197	0	0	0.332567	0.233	0.024	mTAL
	LINC01965	0	0	0.368868	0.236	0.027	mTAL
	LINC01594	0	0	0.317397	0.251	0.045	mTAL
	GMPR	0	0	0.342732	0.25	0.046	mTAL
	AC090709.1	0	0	0.31214	0.22	0.026	mTAL
	GRM1	0	0	0.283862	0.207	0.024	mTAL
	KAZN-AS1	0	0	0.265682	0.211	0.029	mTAL
	SLC4A8	0	0	0.259825	0.216	0.037	mTAL
	LINC02484	0	0	0.333493	0.189	0.014	mTAL
	SPATC1	0	0	0.243241	0.191	0.024	mTAL
	DUSP9	0	0	0.240335	0.2	0.033	mTAL
	RNF212	0	0	0.239806	0.199	0.033	mTAL
	IDH2-DT	0	0	0.235718	0.183	0.024	mTAL
	LRRC2	0	0	0.216625	0.169	0.024	mTAL
	AC108749.1	0	0	0.246007	0.153	0.008	mTAL
	PLAU	0	0	0.225237	0.159	0.019	mTAL
	PRMT8	0	0	0.229748	0.143	0.009	mTAL
	PLEKHG4B	0	0	0.196673	0.137	0.009	mTAL
	SIRLNT	0	0	0.250779	0.135	0.009	mTAL
	LINC00379	0	0	0.184176	0.137	0.014	mTAL
	ROBO2	0	0	2.57819	0.874	0.054	Macula Densa
	MEST	4.02615e-279	1.06306e-274	0.922751	0.532	0.022	Macula Densa
	GRM7	7.52987e-233	1.98819e-228	0.829998	0.36	0.012	Macula Densa
	AC016576.1	6.79053e-204	1.79297e-199	0.42449	0.234	0.006	Macula Densa
	PCAT18	6.55589e-197	1.73102e-192	0.287023	0.18	0.003	Macula Densa
	NOS1	9.41e-178	2.48462e-173	1.21207	0.73	0.066	Macula Densa
	ENOX1	9.54149e-174	2.51934e-169	2.35152	0.928	0.121	Macula Densa
	LAMB4	1.18209e-173	3.1212e-169	0.653471	0.36	0.016	Macula Densa
	AC024022.1	8.51022e-152	2.24704e-147	1.15609	0.721	0.075	Macula Densa
	CALCR	1.21921e-150	3.21919e-146	1.66481	0.721	0.075	Macula Densa
	COMP	4.9516e-150	1.30742e-145	0.170291	0.072	0.001	Macula Densa
	FAM155A	8.89588e-150	2.34887e-145	1.97016	0.712	0.075	Macula Densa
	CA10	8.48977e-133	2.24164e-128	1.48393	0.874	0.126	Macula Densa
	RIMS1	7.19198e-129	1.89897e-124	0.618602	0.252	0.011	Macula Densa
	TMPRSS4	1.69141e-126	4.46601e-122	0.675864	0.468	0.037	Macula Densa
	PPFIA2	2.48091e-126	6.55059e-122	1.56773	0.721	0.091	Macula Densa
	BRINP3	5.63821e-124	1.48871e-119	0.972262	0.568	0.055	Macula Densa
	ACPP	3.6525e-121	9.64407e-117	1.05739	0.622	0.068	Macula Densa
	NLGN4X	6.5723e-109	1.73535e-104	0.410625	0.297	0.017	Macula Densa
	BBOX1	1.39477e-108	3.68276e-104	1.88176	0.757	0.116	Macula Densa
	PDK4	2.25097e-106	5.94347e-102	1.99496	0.739	0.115	Macula Densa
	PAPSS2	1.30261e-100	3.4394e-96	0.913531	0.595	0.073	Macula Densa
	AUXG01000058.1	5.05558e-98	1.33487e-93	0.377198	0.288	0.018	Macula Densa
	CNTN1	9.81751e-98	2.59221e-93	0.771163	0.532	0.059	Macula Densa
	SLC12A1	2.92634e-97	7.72671e-93	2.11756	1	0.225	Macula Densa
	RBFOX1	9.97552e-94	2.63394e-89	1.72349	0.82	0.15	Macula Densa
	NPSR1-AS1	9.2339e-89	2.43812e-84	0.906159	0.631	0.088	Macula Densa
	KCNMB2-AS1	1.28437e-88	3.39126e-84	1.03595	0.495	0.058	Macula Densa
	LINC02398	8.84294e-85	2.33489e-80	0.548188	0.351	0.03	Macula Densa
	ITPRID2	2.06103e-84	5.44195e-80	0.91846	0.658	0.106	Macula Densa
	VWC2	3.96573e-83	1.04711e-78	0.251045	0.144	0.005	Macula Densa
	COL4A3	2.21808e-77	5.85661e-73	1.70898	0.937	0.287	Macula Densa
	PHACTR3	3.35582e-75	8.86071e-71	0.432453	0.306	0.026	Macula Densa
	SPHKAP	1.32274e-74	3.49257e-70	0.389723	0.108	0.003	Macula Densa
	SUCNR1	2.0455e-74	5.40093e-70	0.393954	0.297	0.025	Macula Densa
	RANBP3L	4.3755e-71	1.15531e-66	1.05963	0.712	0.137	Macula Densa
	PPM1E	8.30545e-70	2.19297e-65	0.729592	0.486	0.066	Macula Densa
	IFITM10	1.25918e-69	3.32475e-65	0.272165	0.207	0.013	Macula Densa
	LINC01182	8.20773e-69	2.16717e-64	1.05445	0.622	0.113	Macula Densa
	PCDH9	6.01402e-68	1.58794e-63	1.53416	0.865	0.219	Macula Densa
	ERBB4	1.63787e-66	4.32463e-62	2.39876	1	0.5	Macula Densa
	EFHD1	4.05917e-66	1.07178e-61	0.927948	0.757	0.167	Macula Densa
	CPS1	2.15111e-64	5.67979e-60	0.666482	0.234	0.018	Macula Densa
	RYR3	5.41613e-64	1.43007e-59	0.562895	0.279	0.025	Macula Densa
	LRP1B	6.03303e-64	1.59296e-59	1.1873	0.874	0.224	Macula Densa
	CCSER1	1.72561e-63	4.55631e-59	2.01639	1	0.616	Macula Densa
	COLEC10	1.97917e-63	5.22581e-59	0.453183	0.288	0.027	Macula Densa
	MGLL	2.34186e-63	6.18344e-59	0.815946	0.676	0.138	Macula Densa
	PLA2G4A	4.31225e-63	1.13861e-58	0.630326	0.297	0.029	Macula Densa
	DEPTOR	3.84229e-62	1.01452e-57	1.392	0.811	0.22	Macula Densa
	ACSL4	4.53513e-62	1.19746e-57	1.51138	0.766	0.193	Macula Densa
	EPHA6	6.12249e-62	1.61658e-57	0.532759	0.288	0.028	Macula Densa
	CA4	6.66507e-62	1.75985e-57	0.377463	0.288	0.028	Macula Densa
	NPNT	5.91093e-61	1.56072e-56	0.82523	0.577	0.104	Macula Densa
	CRIP3	4.05564e-60	1.07085e-55	0.130758	0.099	0.004	Macula Densa
	PAPPA2	6.50282e-60	1.717e-55	1.51507	0.45	0.069	Macula Densa
	PDE3A	7.1704e-59	1.89327e-54	0.834554	0.495	0.08	Macula Densa
	LINC01606	1.10278e-58	2.91178e-54	1.11086	0.739	0.18	Macula Densa
	IRX2	1.12136e-58	2.96085e-54	0.357828	0.324	0.036	Macula Densa
	CASR	2.33839e-57	6.17428e-53	1.1808	0.838	0.219	Macula Densa
	KLHL13	3.04535e-57	8.04095e-53	1.29879	0.847	0.244	Macula Densa
	MYH10	4.43861e-57	1.17197e-52	0.888561	0.694	0.159	Macula Densa
	CLCN5	3.63138e-55	9.58829e-51	1.26439	0.865	0.278	Macula Densa
	CLDN10-AS1	7.96704e-55	2.10362e-50	1.0082	0.595	0.125	Macula Densa
	LINC01055	1.74118e-54	4.59742e-50	0.552939	0.297	0.033	Macula Densa
	AC009478.1	2.12391e-54	5.60797e-50	0.657999	0.378	0.052	Macula Densa
	AC024901.1	9.54682e-54	2.52074e-49	0.486419	0.369	0.049	Macula Densa
	SCN7A	6.40375e-52	1.69084e-47	0.687774	0.577	0.112	Macula Densa
	GNGT1	2.22932e-51	5.88629e-47	0.982047	0.55	0.11	Macula Densa
	ACSL6	1.95018e-50	5.14925e-46	0.257486	0.189	0.015	Macula Densa
	THSD4	4.63796e-50	1.22461e-45	1.08362	0.676	0.166	Macula Densa
	AC083837.1	2.24921e-49	5.93881e-45	0.895081	0.559	0.119	Macula Densa
	AC007938.3	1.18734e-48	3.13505e-44	0.10903	0.072	0.002	Macula Densa
	AC011586.2	1.32723e-48	3.50441e-44	0.895638	0.523	0.103	Macula Densa
	NRG3	4.06504e-48	1.07333e-43	0.880422	0.577	0.124	Macula Densa
	CA12	9.53497e-48	2.51761e-43	1.11372	0.856	0.279	Macula Densa
	TNFRSF11B	1.20341e-47	3.17747e-43	0.419257	0.306	0.039	Macula Densa
	VDR	1.71122e-47	4.5183e-43	0.493549	0.378	0.058	Macula Densa
	TFCP2L1	2.73274e-47	7.21553e-43	0.987713	0.91	0.313	Macula Densa
	AC069228.1	3.08084e-47	8.13464e-43	0.231891	0.162	0.012	Macula Densa
	UGT8	5.42955e-47	1.43362e-42	0.777526	0.694	0.175	Macula Densa
	ADAMTS9-AS2	1.09591e-46	2.89363e-42	1.28509	0.964	0.397	Macula Densa
	BBOX1-AS1	1.36273e-46	3.59814e-42	0.838776	0.405	0.067	Macula Densa
	LINC01091	1.43223e-46	3.78166e-42	0.771539	0.45	0.082	Macula Densa
	DZIP1	1.99961e-46	5.27976e-42	0.693554	0.577	0.128	Macula Densa
	PRKD1	3.44293e-46	9.09072e-42	1.2185	0.901	0.34	Macula Densa
	MSR1	2.67639e-45	7.06675e-41	0.873117	0.568	0.127	Macula Densa
	PKP4	3.16741e-45	8.36324e-41	1.4224	0.946	0.446	Macula Densa
	TLR2	2.13738e-44	5.64354e-40	0.440763	0.351	0.052	Macula Densa
	IRX1	2.16298e-44	5.71113e-40	0.206645	0.171	0.014	Macula Densa
	CACNB2	2.79095e-44	7.36923e-40	0.793252	0.586	0.135	Macula Densa
	KCTD1	6.12376e-44	1.61692e-39	0.857813	0.739	0.21	Macula Densa
	KIF16B	6.8102e-44	1.79817e-39	0.762257	0.748	0.224	Macula Densa
	ANKRD62P1-PARP4P3	9.63254e-44	2.54338e-39	0.23441	0.189	0.017	Macula Densa
	CCDC148	1.72386e-42	4.55168e-38	0.931309	0.748	0.234	Macula Densa
	COL4A4	3.33854e-42	8.81507e-38	0.870423	0.766	0.241	Macula Densa
	ETV1	1.71992e-40	4.54128e-36	0.299575	0.234	0.027	Macula Densa
	PIP5K1B	4.08056e-40	1.07743e-35	0.670124	0.523	0.119	Macula Densa
	RALYL	5.76772e-40	1.52291e-35	0.822948	0.703	0.196	Macula Densa
	GRB14	6.80406e-40	1.79654e-35	0.675926	0.676	0.186	Macula Densa
	AL354771.1	8.24762e-40	2.1777e-35	0.161394	0.108	0.006	Macula Densa
	TBC1D4	1.25592e-39	3.31613e-35	0.966154	0.874	0.345	Macula Densa
	GNAS	1.88981e-39	4.98987e-35	1.07289	0.658	0.199	Macula Densa
	STK32B	2.14256e-39	5.65721e-35	0.939569	0.685	0.207	Macula Densa
	HIP1	5.64856e-39	1.49145e-34	0.982142	0.811	0.277	Macula Densa
	SCHLAP1	7.15105e-39	1.88816e-34	0.754485	0.468	0.099	Macula Densa
	AC019197.1	1.15506e-38	3.04983e-34	0.823507	0.874	0.294	Macula Densa
	RIMBP2	3.25834e-38	8.60332e-34	0.423332	0.36	0.062	Macula Densa
	AC097662.1	1.02481e-37	2.7059e-33	0.64586	0.459	0.102	Macula Densa
	CCDC80	1.08685e-37	2.86972e-33	0.173593	0.099	0.006	Macula Densa
	CPNE4	1.13383e-37	2.99376e-33	0.66524	0.261	0.036	Macula Densa
	SEC14L1	1.14826e-37	3.03185e-33	0.766128	0.568	0.147	Macula Densa
	CCDC178	1.54225e-37	4.07215e-33	0.814044	0.577	0.151	Macula Densa
	ETV5	4.22382e-37	1.11526e-32	0.320491	0.252	0.033	Macula Densa
	ABLIM1	1.57382e-36	4.15551e-32	0.983713	0.91	0.421	Macula Densa
	ADGRV1	1.63059e-36	4.30542e-32	0.525556	0.495	0.115	Macula Densa
	PLCB1	1.89864e-36	5.01317e-32	0.938119	0.946	0.35	Macula Densa
	CNTN5	4.61814e-36	1.21937e-31	0.712086	0.234	0.031	Macula Densa
	LGR4	6.95336e-36	1.83596e-31	1.07267	0.838	0.337	Macula Densa
	HPCAL4	1.0322e-35	2.72541e-31	0.106298	0.081	0.004	Macula Densa
	AC002460.2	1.27723e-35	3.37239e-31	0.886729	0.613	0.175	Macula Densa
	EFEMP1	1.45991e-35	3.85475e-31	0.401299	0.261	0.037	Macula Densa
	MFHAS1	1.57989e-35	4.17155e-31	0.777936	0.739	0.25	Macula Densa
	LINC00271	1.9257e-35	5.08463e-31	0.756093	0.622	0.182	Macula Densa
	AC092546.1	3.40407e-35	8.9881e-31	0.32322	0.279	0.042	Macula Densa
	DAPK1	1.20985e-34	3.19448e-30	0.993624	0.721	0.258	Macula Densa
	CLDN10	4.50142e-34	1.18855e-29	0.564233	0.676	0.195	Macula Densa
	LINC01725	1.30783e-33	3.45319e-29	0.756961	0.667	0.213	Macula Densa
	EFNA5	2.76159e-33	7.29172e-29	0.83133	0.838	0.302	Macula Densa
	FAM110C	1.87755e-32	4.95747e-28	0.298889	0.225	0.031	Macula Densa
	SLCO4A1	3.23206e-32	8.53394e-28	0.225791	0.153	0.015	Macula Densa
	LRRK2	5.57222e-32	1.47129e-27	0.729125	0.658	0.211	Macula Densa
	KSR2	7.54111e-32	1.99115e-27	0.547434	0.387	0.082	Macula Densa
	PLEKHA5	1.36051e-31	3.59228e-27	0.995835	0.901	0.448	Macula Densa
	SLC22A3	2.35747e-31	6.22467e-27	0.408917	0.297	0.052	Macula Densa
	NAALADL2	3.0688e-31	8.10287e-27	0.943937	0.91	0.445	Macula Densa
	TFAP2B	7.94926e-30	2.09892e-25	0.431372	0.369	0.079	Macula Densa
	PDZRN4	9.05624e-30	2.39121e-25	0.192958	0.126	0.011	Macula Densa
	LINC01933	1.26638e-28	3.34374e-24	0.231524	0.18	0.022	Macula Densa
	TINAG	2.32723e-28	6.14483e-24	0.457658	0.477	0.12	Macula Densa
	LINC00472	4.20008e-28	1.10899e-23	0.950264	0.928	0.509	Macula Densa
	CGNL1	4.74926e-28	1.254e-23	0.782122	0.82	0.323	Macula Densa
	FIBIN	4.88987e-28	1.29112e-23	0.104674	0.081	0.005	Macula Densa
	CACNA2D3	5.22224e-28	1.37888e-23	0.844045	0.775	0.284	Macula Densa
	FGF2	7.30637e-28	1.92917e-23	0.275925	0.207	0.03	Macula Densa
	IVNS1ABP	1.04585e-27	2.76146e-23	0.685771	0.622	0.213	Macula Densa
	SEMA6D	1.38748e-27	3.6635e-23	0.495745	0.441	0.114	Macula Densa
	RHOBTB3	1.69465e-27	4.47454e-23	0.74517	0.694	0.252	Macula Densa
	MECOM	2.1493e-27	5.67502e-23	0.81637	1	0.495	Macula Densa
	MEIKIN	2.51514e-27	6.64099e-23	0.226003	0.126	0.012	Macula Densa
	NCAM2	5.30948e-27	1.40192e-22	0.241804	0.135	0.014	Macula Densa
	NRK	5.96064e-27	1.57385e-22	0.504555	0.459	0.123	Macula Densa
	CHP1	8.10552e-27	2.14018e-22	0.448996	0.333	0.072	Macula Densa
	AC104123.1	8.49747e-27	2.24367e-22	0.547944	0.405	0.102	Macula Densa
	LHFPL3-AS2	2.00946e-26	5.30578e-22	0.352436	0.36	0.081	Macula Densa
	TMEM233	2.29172e-26	6.05105e-22	0.159101	0.126	0.013	Macula Densa
	MAGI2	3.01167e-26	7.95203e-22	0.768349	0.757	0.313	Macula Densa
	AC091563.1	4.67774e-26	1.23511e-21	0.216253	0.171	0.022	Macula Densa
	ATP6V1B1	1.13227e-25	2.98965e-21	0.35294	0.351	0.079	Macula Densa
	ZNF483	1.45923e-25	3.85294e-21	0.288234	0.306	0.063	Macula Densa
	LINGO2	2.24482e-25	5.92721e-21	0.726135	0.315	0.068	Macula Densa
	AL513166.1	2.45622e-25	6.48539e-21	0.384887	0.279	0.055	Macula Densa
	PCDH9-AS2	2.92795e-25	7.73095e-21	0.213818	0.171	0.023	Macula Densa
	NPSR1	4.41876e-25	1.16673e-20	0.168447	0.144	0.017	Macula Densa
	AL163541.1	4.9758e-25	1.31381e-20	0.267759	0.162	0.021	Macula Densa
	ESRRG	6.28393e-25	1.65921e-20	0.836765	0.982	0.646	Macula Densa
	FMN1	6.73564e-25	1.77848e-20	0.442201	0.595	0.189	Macula Densa
	FAM171B	1.58732e-24	4.19116e-20	0.188806	0.108	0.01	Macula Densa
	SPIRE1	1.71394e-24	4.52548e-20	0.495669	0.586	0.195	Macula Densa
	KCTD8	6.96119e-24	1.83803e-19	0.531528	0.405	0.109	Macula Densa
	ATP6V0E1	7.23857e-24	1.91127e-19	0.470242	0.432	0.123	Macula Densa
	CSGALNACT1	8.75688e-24	2.31217e-19	0.662918	0.586	0.204	Macula Densa
	SORBS2	2.17341e-23	5.73868e-19	0.63138	0.739	0.319	Macula Densa
	AL365295.1	3.18228e-23	8.40249e-19	0.636484	0.306	0.07	Macula Densa
	CECR2	3.27391e-23	8.64443e-19	0.458722	0.396	0.108	Macula Densa
	CPEB2	4.88155e-23	1.28892e-18	0.58616	0.604	0.22	Macula Densa
	SESTD1	1.13745e-22	3.00332e-18	0.580648	0.568	0.205	Macula Densa
	CTNNA2	1.34572e-22	3.55325e-18	0.276969	0.099	0.009	Macula Densa
	LINC00645	1.56233e-22	4.12518e-18	0.395067	0.351	0.089	Macula Densa
	SMCO4	1.67891e-22	4.43299e-18	0.344347	0.252	0.05	Macula Densa
	GRAMD1C	1.83056e-22	4.8334e-18	0.490933	0.459	0.142	Macula Densa
	SSBP2	1.91174e-22	5.04776e-18	0.628406	0.721	0.305	Macula Densa
	CA8	2.1202e-22	5.59818e-18	0.224426	0.207	0.035	Macula Densa
	GABRB3	2.8621e-22	7.55708e-18	0.376955	0.297	0.066	Macula Densa
	LINC01117	3.43802e-22	9.07776e-18	0.522011	0.369	0.1	Macula Densa
	MERTK	4.25534e-22	1.12358e-17	0.312123	0.396	0.106	Macula Densa
	PRICKLE2	4.45205e-22	1.17552e-17	0.635009	0.64	0.247	Macula Densa
	WWC2	5.91004e-22	1.56049e-17	0.679563	0.676	0.289	Macula Densa
	AC090630.1	6.56359e-22	1.73305e-17	0.211254	0.18	0.028	Macula Densa
	HOTAIRM1	8.32359e-22	2.19776e-17	0.290421	0.261	0.054	Macula Densa
	SVIL	1.10025e-21	2.90509e-17	0.636828	0.685	0.288	Macula Densa
	RNF24	1.38284e-21	3.65125e-17	0.403836	0.432	0.127	Macula Densa
	MUC1	1.58707e-21	4.19049e-17	0.343005	0.315	0.076	Macula Densa
	TOM1L1	2.45396e-21	6.47943e-17	0.455031	0.55	0.194	Macula Densa
	SUSD4	2.97664e-21	7.85953e-17	0.489723	0.405	0.118	Macula Densa
	NR1H4	3.16987e-21	8.36972e-17	0.381128	0.387	0.107	Macula Densa
	WNK4	3.36799e-21	8.89284e-17	0.366959	0.333	0.084	Macula Densa
	PANTR1	6.24062e-21	1.64777e-16	0.512754	0.468	0.153	Macula Densa
	PDE7B	7.81246e-21	2.0628e-16	0.599769	0.685	0.282	Macula Densa
	TLE2	9.0701e-21	2.39487e-16	0.221079	0.189	0.032	Macula Densa
	UNC5D	0	0	1.6593	0.695	0.046	DTL
	LINC01435	0	0	2.17496	0.636	0.03	DTL
	SATB2	0	0	1.26032	0.639	0.064	DTL
	LRRC4C	0	0	1.75194	0.591	0.028	DTL
	AC003984.1	0	0	1.11406	0.595	0.027	DTL
	EDIL3	0	0	1.15184	0.58	0.029	DTL
	SLC44A5	0	0	1.19641	0.569	0.046	DTL
	GRM5	0	0	0.926311	0.506	0.037	DTL
	ABCA13	0	0	0.735216	0.442	0.013	DTL
	LINC02471	0	0	0.653953	0.431	0.028	DTL
	CPE	0	0	0.687125	0.405	0.011	DTL
	NTM	0	0	0.66028	0.379	0.017	DTL
	AC005323.2	0	0	0.558454	0.312	0.01	DTL
	IRX3	0	0	0.453621	0.297	0.006	DTL
	KLRG2	0	0	0.415096	0.245	0.007	DTL
	SLCO1A2	0	0	0.43924	0.242	0.005	DTL
	FUT9	0	0	0.488815	0.23	0.004	DTL
	GRM5-AS1	0	0	0.285577	0.182	0.003	DTL
	AL353740.1	0	0	0.228553	0.145	0.002	DTL
	AC113383.1	2.12815e-291	5.61918e-287	0.516601	0.264	0.012	DTL
	PHYHIPL	1.79973e-280	4.75201e-276	1.26416	0.699	0.09	DTL
	SLC4A11	2.10528e-279	5.55877e-275	0.230187	0.145	0.003	DTL
	KCTD16	9.50337e-264	2.50927e-259	1.41156	0.699	0.093	DTL
	CRNDE	2.90361e-252	7.6667e-248	0.578925	0.383	0.028	DTL
	TMEM132D	3.29211e-249	8.69248e-245	0.542905	0.249	0.012	DTL
	EPHA7	5.65384e-220	1.49284e-215	1.24205	0.569	0.071	DTL
	AC098617.1	4.20691e-212	1.11079e-207	0.554807	0.312	0.022	DTL
	CD200	1.24771e-209	3.29446e-205	0.508654	0.375	0.032	DTL
	DNAH11	5.09502e-205	1.34529e-200	0.569955	0.323	0.025	DTL
	AC079630.1	5.67244e-205	1.49775e-200	0.436547	0.286	0.019	DTL
	FAM81B	1.418e-204	3.7441e-200	0.207681	0.13	0.004	DTL
	AC092894.1	1.38797e-201	3.6648e-197	0.5789	0.416	0.041	DTL
	CASC15	2.09563e-189	5.5333e-185	1.1869	0.699	0.127	DTL
	C8orf34	7.90718e-186	2.08781e-181	0.449497	0.245	0.016	DTL
	LINC02149	2.64797e-172	6.99169e-168	0.232856	0.126	0.004	DTL
	UGT2A3	6.92813e-170	1.8293e-165	0.610432	0.398	0.044	DTL
	PROM1	9.22744e-169	2.43641e-164	0.921864	0.632	0.109	DTL
	FOXP2	1.2283e-164	3.24321e-160	1.18919	0.833	0.191	DTL
	PRUNE2	9.79129e-158	2.58529e-153	0.934581	0.632	0.114	DTL
	AC019068.1	1.01424e-155	2.67801e-151	0.161022	0.108	0.004	DTL
	ARMC3	5.74109e-153	1.51588e-148	0.305317	0.193	0.012	DTL
	CRYAB	3.43906e-149	9.08048e-145	0.706968	0.357	0.04	DTL
	CDH2	9.63809e-148	2.54484e-143	0.820991	0.528	0.085	DTL
	STOX2	2.79723e-141	7.38581e-137	1.30247	0.784	0.213	DTL
	DRC1	1.78522e-137	4.7137e-133	0.158608	0.082	0.002	DTL
	BICC1	9.35355e-134	2.46971e-129	1.90769	0.97	0.509	DTL
	RBPMS	4.43047e-133	1.16982e-128	1.67768	0.944	0.414	DTL
	TPM1	1.22444e-131	3.23302e-127	0.943715	0.625	0.132	DTL
	AC012593.1	8.45179e-128	2.23161e-123	0.80253	0.565	0.11	DTL
	SPON1	3.09115e-127	8.16186e-123	0.579612	0.301	0.033	DTL
	FIGN	7.58086e-127	2.00165e-122	0.77467	0.48	0.081	DTL
	AQP1	5.389e-124	1.42291e-119	0.451457	0.264	0.027	DTL
	AC111000.4	2.0099e-122	5.30693e-118	0.526208	0.346	0.045	DTL
	ADAMTS9-AS1	8.12881e-120	2.14633e-115	1.26519	0.74	0.205	DTL
	LINC01320	1.33083e-119	3.51391e-115	1.48165	0.888	0.332	DTL
	ODC1	6.13607e-119	1.62017e-114	0.569207	0.238	0.023	DTL
	LRRK2	3.22347e-118	8.51124e-114	1.10989	0.743	0.209	DTL
	CNNM1	1.36676e-117	3.60879e-113	0.169468	0.104	0.004	DTL
	CFAP54	2.77901e-117	7.33771e-113	0.510073	0.301	0.036	DTL
	NECAB1	7.71917e-117	2.03817e-112	0.303115	0.19	0.015	DTL
	2001-03-01	4.9168e-115	1.29823e-110	1.17399	0.55	0.112	DTL
	AC068234.2	9.92128e-114	2.61962e-109	0.394065	0.238	0.024	DTL
	ALPK2	2.46655e-113	6.51267e-109	0.492787	0.361	0.051	DTL
	CHN2	2.94643e-111	7.77975e-107	1.06596	0.751	0.223	DTL
	UGT2B7	4.03143e-109	1.06446e-104	0.851802	0.662	0.162	DTL
	GALNT14	8.97373e-109	2.36942e-104	1.27827	0.725	0.223	DTL
	AC093765.3	1.42893e-107	3.77293e-103	0.30677	0.19	0.016	DTL
	CNTN4	5.20549e-106	1.37446e-101	0.979375	0.695	0.189	DTL
	LINC01208	1.99153e-103	5.25844e-99	0.296935	0.126	0.008	DTL
	GREB1L	6.8414e-102	1.8064e-97	0.346545	0.201	0.019	DTL
	PAX8	9.80728e-102	2.58951e-97	1.2234	0.911	0.388	DTL
	NPNT	6.46922e-101	1.70813e-96	0.928576	0.491	0.103	DTL
	ADAMTS3	5.52489e-100	1.45879e-95	0.586927	0.297	0.04	DTL
	LINC01781	3.61177e-99	9.53651e-95	0.827001	0.524	0.116	DTL
	PCA3	1.47941e-98	3.90625e-94	0.352408	0.234	0.026	DTL
	TNFRSF11B	7.52962e-98	1.98812e-93	0.466138	0.286	0.038	DTL
	PPFIBP1	1.50956e-97	3.98584e-93	0.950138	0.721	0.22	DTL
	AC093765.2	1.59138e-96	4.20188e-92	0.153961	0.104	0.005	DTL
	NOSTRIN	6.44281e-96	1.70116e-91	0.457409	0.331	0.05	DTL
	NRP1	6.9228e-96	1.8279e-91	1.14435	0.71	0.21	DTL
	LHFPL3	1.56172e-95	4.12358e-91	0.640973	0.454	0.091	DTL
	PKHD1	5.94924e-94	1.57084e-89	1.41835	0.981	0.65	DTL
	MRC2	4.81394e-93	1.27107e-88	0.260482	0.178	0.016	DTL
	AKR1C2	1.45926e-90	3.85302e-86	0.187356	0.119	0.008	DTL
	IRX5	4.51463e-90	1.19204e-85	0.140555	0.093	0.005	DTL
	RNF144B	6.79975e-90	1.79541e-85	0.906151	0.532	0.129	DTL
	ABI3BP	1.67157e-89	4.41363e-85	0.604304	0.387	0.071	DTL
	PAX8-AS1	2.07024e-89	5.46626e-85	0.842876	0.647	0.192	DTL
	PDZK1	7.95492e-89	2.10042e-84	0.602062	0.535	0.125	DTL
	FBXL7	9.893e-89	2.61215e-84	0.598802	0.413	0.078	DTL
	AC005323.1	8.28555e-87	2.18772e-82	0.122197	0.082	0.004	DTL
	PLEKHH2	8.39704e-86	2.21715e-81	0.912052	0.572	0.16	DTL
	CPVL	6.60924e-84	1.7451e-79	0.619256	0.472	0.108	DTL
	AC004540.1	8.11871e-83	2.14366e-78	0.478753	0.413	0.084	DTL
	SLC39A8	1.38018e-82	3.64422e-78	0.441039	0.268	0.039	DTL
	AC092153.1	1.40278e-82	3.70389e-78	0.281118	0.193	0.021	DTL
	CRMP1	3.8545e-82	1.01774e-77	0.41705	0.323	0.055	DTL
	LINC01697	4.06192e-82	1.07251e-77	0.348731	0.264	0.038	DTL
	ITGB8	4.44008e-82	1.17236e-77	0.7774	0.639	0.185	DTL
	LGI2	1.53547e-81	4.05426e-77	0.113273	0.074	0.003	DTL
	ADAMTS9	1.91637e-81	5.05997e-77	0.884118	0.654	0.21	DTL
	NEBL	2.9048e-81	7.66983e-77	0.911697	0.74	0.256	DTL
	BOC	4.34674e-81	1.14771e-76	0.213662	0.16	0.015	DTL
	HYDIN	5.82255e-81	1.53739e-76	0.554394	0.42	0.09	DTL
	ARHGAP29	2.86644e-80	7.56855e-76	1.00651	0.736	0.266	DTL
	FBN2	1.35157e-78	3.5687e-74	0.26167	0.149	0.013	DTL
	DDIT4L	1.3923e-78	3.67622e-74	0.109802	0.063	0.002	DTL
	DYNC2LI1	6.96883e-78	1.84005e-73	0.643702	0.491	0.125	DTL
	IQCA1	8.82502e-78	2.33016e-73	0.440513	0.331	0.06	DTL
	SLC35F3	9.35904e-78	2.47116e-73	0.416485	0.275	0.042	DTL
	LIPC	7.10325e-77	1.87554e-72	0.405501	0.309	0.053	DTL
	NRG1	2.91143e-76	7.68733e-72	0.652428	0.439	0.101	DTL
	RHEX	1.06305e-75	2.80688e-71	0.809498	0.528	0.135	DTL
	EVC	3.73418e-74	9.85973e-70	0.662571	0.472	0.12	DTL
	MYO9A	7.80421e-74	2.06062e-69	1.11674	0.862	0.464	DTL
	FARP1	1.35572e-73	3.57965e-69	1.07867	0.859	0.43	DTL
	NLGN1	2.55164e-73	6.73734e-69	0.90061	0.665	0.211	DTL
	LHFPL3-AS2	3.83836e-73	1.01348e-68	0.564486	0.375	0.08	DTL
	PTPN14	3.25402e-72	8.59192e-68	0.868345	0.625	0.212	DTL
	PRRG1	1.3796e-70	3.6427e-66	0.602908	0.454	0.115	DTL
	ACADL	4.23465e-70	1.11812e-65	0.460914	0.364	0.077	DTL
	EGFR	8.87543e-70	2.34347e-65	0.733039	0.58	0.181	DTL
	CLIC4	9.63864e-70	2.54499e-65	0.693656	0.52	0.144	DTL
	FAT1	6.23175e-69	1.64543e-64	0.553099	0.517	0.143	DTL
	COL4A1	1.78232e-68	4.70604e-64	0.706636	0.513	0.144	DTL
	LINC01948	2.72656e-68	7.19921e-64	0.374523	0.297	0.054	DTL
	SLCO3A1	6.02768e-68	1.59155e-63	0.724186	0.621	0.205	DTL
	TMEM163	6.58526e-68	1.73877e-63	0.411909	0.309	0.058	DTL
	SDC2	1.00615e-67	2.65663e-63	0.457539	0.364	0.078	DTL
	ARHGAP26	1.42148e-67	3.75329e-63	0.96014	0.743	0.294	DTL
	MIR548A1HG	4.79207e-67	1.2653e-62	0.184938	0.108	0.008	DTL
	MACC1	7.73974e-67	2.0436e-62	0.71864	0.506	0.143	DTL
	TNFSF10	7.9402e-67	2.09653e-62	0.591986	0.387	0.089	DTL
	ITGB3	2.27268e-66	6.00079e-62	0.343985	0.257	0.042	DTL
	WDFY3	8.91457e-66	2.3538e-61	0.958911	0.799	0.394	DTL
	CCDC198	1.37263e-65	3.62429e-61	0.75121	0.665	0.252	DTL
	MIR31HG	3.41679e-65	9.02169e-61	0.336862	0.283	0.05	DTL
	WWC1	7.85509e-65	2.07406e-60	0.804222	0.677	0.259	DTL
	SPC25	8.21297e-65	2.16855e-60	0.14682	0.112	0.009	DTL
	TMEFF2	8.21657e-65	2.1695e-60	0.177161	0.104	0.008	DTL
	ZDHHC14	8.92537e-65	2.35666e-60	0.769812	0.673	0.246	DTL
	HIST1H2AC	1.78401e-64	4.71049e-60	0.824857	0.539	0.16	DTL
	SCARA3	3.88103e-64	1.02475e-59	0.110996	0.078	0.005	DTL
	KLHL29	2.20233e-63	5.81503e-59	0.385175	0.312	0.062	DTL
	HMGA2-AS1	3.10494e-63	8.19827e-59	0.330538	0.193	0.027	DTL
	DOCK11	3.42191e-63	9.03521e-59	0.75349	0.584	0.189	DTL
	KCNJ15	5.80066e-63	1.53161e-58	0.571684	0.539	0.154	DTL
	DCDC1	2.57327e-62	6.79446e-58	0.498166	0.431	0.112	DTL
	PARD3	6.19613e-62	1.63603e-57	0.849139	0.911	0.476	DTL
	TBC1D4	1.60662e-61	4.24213e-57	1.02489	0.758	0.344	DTL
	ZNF385B	1.71632e-61	4.53177e-57	0.643837	0.48	0.138	DTL
	FSTL1	1.0681e-60	2.8202e-56	0.220254	0.182	0.024	DTL
	CTTNBP2	1.43194e-60	3.78089e-56	0.467214	0.428	0.111	DTL
	GALNT18	1.43441e-60	3.78742e-56	0.777507	0.628	0.233	DTL
	SLC6A6	3.0786e-60	8.12874e-56	0.630075	0.316	0.068	DTL
	PDZRN3	4.6292e-60	1.22229e-55	0.825061	0.565	0.193	DTL
	SASH1	4.81326e-60	1.27089e-55	0.728898	0.625	0.222	DTL
	AC079328.2	4.66633e-59	1.2321e-54	0.126266	0.097	0.008	DTL
	OXR1	1.25181e-58	3.30529e-54	0.970147	0.874	0.501	DTL
	AMACR	4.35259e-57	1.14926e-52	0.306975	0.208	0.033	DTL
	LINC00472	6.1107e-56	1.61347e-51	0.903799	0.888	0.507	DTL
	NEK11	7.46903e-56	1.97212e-51	0.532761	0.428	0.12	DTL
	LRRIQ1	8.16043e-56	2.15468e-51	0.532689	0.353	0.088	DTL
	ADGRL3	2.02463e-55	5.34582e-51	0.607455	0.23	0.041	DTL
	TTC29	3.94137e-55	1.04068e-50	0.156658	0.078	0.005	DTL
	NFAT5	4.16591e-55	1.09997e-50	1.03423	0.81	0.464	DTL
	KAZN	5.91732e-55	1.56241e-50	0.916227	0.833	0.377	DTL
	HIST1H2BG	4.58378e-54	1.2103e-49	0.220223	0.152	0.019	DTL
	ALDH1A3	1.48065e-53	3.9095e-49	0.121935	0.089	0.007	DTL
	CDH6	1.7292e-53	4.56578e-49	0.630519	0.368	0.091	DTL
	AC079352.1	3.491e-53	9.21764e-49	0.806573	0.465	0.142	DTL
	RMST	7.56634e-53	1.99782e-48	0.440723	0.405	0.105	DTL
	HTR4	1.96453e-52	5.18715e-48	0.10425	0.052	0.003	DTL
	GRHL2	1.17488e-51	3.10215e-47	0.520387	0.48	0.152	DTL
	SOX6	1.72374e-51	4.55137e-47	0.780847	0.814	0.405	DTL
	MAP3K1	4.60704e-51	1.21644e-46	0.806074	0.68	0.303	DTL
	AKR1C1	5.85125e-50	1.54496e-45	0.202657	0.126	0.015	DTL
	NTN4	6.05403e-50	1.59851e-45	0.593107	0.509	0.172	DTL
	AL356094.2	9.63458e-50	2.54391e-45	0.121782	0.086	0.007	DTL
	AC006994.2	2.16525e-49	5.71713e-45	0.327059	0.305	0.071	DTL
	XKR4	3.86998e-49	1.02183e-44	0.384433	0.175	0.027	DTL
	PTPRD	3.8999e-49	1.02973e-44	0.442467	0.498	0.15	DTL
	PDE7B	4.55712e-49	1.20326e-44	0.706825	0.665	0.281	DTL
	GABRA2	5.80906e-49	1.53382e-44	0.255971	0.19	0.031	DTL
	CFAP43	6.00846e-49	1.58647e-44	0.376623	0.275	0.061	DTL
	WDR78	8.6962e-49	2.29614e-44	0.396018	0.361	0.096	DTL
	LRP2	8.80545e-49	2.32499e-44	0.257533	0.513	0.151	DTL
	PDE4D	1.01322e-48	2.67531e-44	0.737232	0.967	0.767	DTL
	KCNJ3	2.31643e-48	6.11631e-44	0.685584	0.506	0.178	DTL
	AC079380.1	3.74706e-48	9.89373e-44	0.175702	0.112	0.012	DTL
	CDKL2	4.72201e-48	1.2468e-43	0.322496	0.275	0.061	DTL
	COL5A1	1.77918e-47	4.69776e-43	0.163299	0.115	0.013	DTL
	ADAMTS9-AS2	9.63196e-47	2.54322e-42	0.842907	0.807	0.396	DTL
	FRMD3	1.43458e-46	3.78786e-42	0.506177	0.494	0.165	DTL
	AC113386.1	2.92204e-46	7.71536e-42	0.240674	0.164	0.025	DTL
	BMP7	2.93432e-46	7.74779e-42	0.133929	0.089	0.008	DTL
	NUPR1	5.75258e-46	1.51891e-41	0.111446	0.082	0.007	DTL
	DAPK1	8.39342e-46	2.2162e-41	0.596439	0.625	0.257	DTL
	SPNS2	3.62947e-45	9.58326e-41	0.288452	0.249	0.053	DTL
	SLCO2A1	3.86215e-45	1.01976e-40	0.215001	0.208	0.038	DTL
	FOXP2	0	0	1.91386	0.877	0.186	ATL
	SLC44A5	0	0	1.21052	0.588	0.042	ATL
	PROM1	0	0	1.08693	0.624	0.105	ATL
	CASC15	0	0	1.07531	0.616	0.124	ATL
	SATB2	0	0	0.978224	0.454	0.063	ATL
	ADGRL3	0	0	0.833607	0.392	0.037	ATL
	HMGA2-AS1	0	0	0.528069	0.305	0.024	ATL
	ABCA13	0	0	0.570992	0.288	0.012	ATL
	COL26A1	0	0	0.518075	0.284	0.024	ATL
	C8orf34	0	0	0.602682	0.25	0.014	ATL
	EYA1	0	0	0.421193	0.212	0.014	ATL
	TMEM132D	0	0	0.478499	0.199	0.011	ATL
	KLRG2	0	0	0.281148	0.164	0.006	ATL
	FUT9	0	0	0.372801	0.146	0.004	ATL
	AC023669.2	0	0	0.202868	0.091	0.001	ATL
	AC023669.1	0	0	0.109256	0.062	0.001	ATL
	PFKFB3	6.55926e-299	1.73191e-294	0.835792	0.572	0.108	ATL
	EDIL3	1.38323e-287	3.65228e-283	0.58	0.287	0.029	ATL
	CRNDE	3.78868e-285	1.00036e-280	0.404008	0.277	0.027	ATL
	SMAD9	7.29795e-285	1.92695e-280	0.436458	0.214	0.016	ATL
	PAX8	1.64919e-281	4.35453e-277	1.64207	0.912	0.384	ATL
	EVC	1.58587e-274	4.18733e-270	0.956081	0.558	0.116	ATL
	CRMP1	1.67463e-274	4.42169e-270	0.645616	0.376	0.052	ATL
	AC092894.1	2.25051e-268	5.94224e-264	0.490508	0.326	0.04	ATL
	MYO9A	5.96054e-263	1.57382e-258	1.57051	0.916	0.46	ATL
	ALDH1A2	5.74117e-260	1.5159e-255	1.45274	0.575	0.129	ATL
	RHEX	2.78179e-250	7.34504e-246	1.22771	0.596	0.131	ATL
	PAX8-AS1	1.42986e-234	3.77541e-230	1.06727	0.661	0.189	ATL
	KCNMB2-AS1	5.06313e-234	1.33687e-229	0.632565	0.361	0.055	ATL
	MRC2	8.11734e-234	2.1433e-229	0.292204	0.186	0.015	ATL
	RNF144B	8.1492e-231	2.15172e-226	1.03504	0.548	0.126	ATL
	CDKL2	3.20501e-229	8.46252e-225	0.544971	0.37	0.058	ATL
	EPHA7	4.15696e-228	1.0976e-223	0.874148	0.407	0.07	ATL
	CD200	8.55865e-224	2.25983e-219	0.376964	0.266	0.031	ATL
	CPE	3.10715e-223	8.20412e-219	0.243156	0.159	0.011	ATL
	TPM1	3.35078e-221	8.84739e-217	0.908942	0.548	0.129	ATL
	NEBL	1.59783e-218	4.2189e-214	1.20764	0.747	0.253	ATL
	IRX3	2.75402e-209	7.27172e-205	0.179573	0.117	0.006	ATL
	BICC1	4.77662e-203	1.26122e-198	1.46737	0.938	0.506	ATL
	SIM2	9.57301e-191	2.52766e-186	0.754508	0.562	0.144	ATL
	PKHD1	3.01759e-190	7.96765e-186	1.28021	0.981	0.648	ATL
	ARHGAP29	6.88637e-189	1.81828e-184	1.24711	0.713	0.262	ATL
	PPM1H	2.15537e-185	5.69104e-181	0.908223	0.566	0.162	ATL
	ATOH8	3.06526e-184	8.09352e-180	0.132796	0.079	0.003	ATL
	PHYHIPL	3.60683e-183	9.52348e-179	0.773651	0.418	0.089	ATL
	LINC02652	2.95228e-178	7.79521e-174	0.305057	0.19	0.02	ATL
	AL033523.1	3.86244e-176	1.01984e-171	0.285589	0.1	0.006	ATL
	ADAMTS9-AS2	4.05668e-167	1.07113e-162	1.18199	0.851	0.392	ATL
	LINC02649	4.10507e-167	1.0839e-162	0.490167	0.339	0.063	ATL
	SHISA9	1.26312e-164	3.33514e-160	0.765545	0.344	0.067	ATL
	SCARA3	1.03382e-157	2.72971e-153	0.12328	0.081	0.004	ATL
	BCAS1	3.25962e-151	8.6067e-147	0.26607	0.144	0.014	ATL
	AKR1C2	3.2226e-149	8.50896e-145	0.168579	0.102	0.007	ATL
	LINC00472	2.13979e-147	5.64989e-143	1.19013	0.865	0.505	ATL
	SGIP1	3.93151e-147	1.03808e-142	0.920165	0.564	0.18	ATL
	LINC01320	1.27165e-144	3.35767e-140	1.07539	0.76	0.33	ATL
	JAG1	3.51412e-143	9.27869e-139	0.5443	0.305	0.06	ATL
	THSD7A	2.05674e-139	5.43063e-135	0.953838	0.744	0.326	ATL
	AC079382.2	8.56216e-139	2.26075e-134	0.135757	0.063	0.003	ATL
	AC096531.2	7.05287e-136	1.86224e-131	0.433112	0.235	0.038	ATL
	MIR3681HG	2.42215e-135	6.39544e-131	0.403433	0.201	0.029	ATL
	LINC00882	1.27932e-132	3.3779e-128	1.02106	0.37	0.092	ATL
	CHN2	1.86693e-130	4.92945e-126	0.816626	0.6	0.221	ATL
	BOC	4.57512e-130	1.20801e-125	0.202502	0.136	0.014	ATL
	LIPC	1.0632e-129	2.80729e-125	0.382947	0.272	0.051	ATL
	OXR1	1.05187e-128	2.77735e-124	1.10619	0.846	0.498	ATL
	STOX2	4.15028e-128	1.09584e-123	0.814216	0.588	0.212	ATL
	BICD1	1.84486e-127	4.87118e-123	0.829521	0.608	0.225	ATL
	ID4	3.41023e-124	9.00437e-120	0.183904	0.131	0.014	ATL
	UGT2B7	5.06292e-124	1.33681e-119	0.796694	0.507	0.16	ATL
	XIST	5.13358e-123	1.35547e-118	0.882173	0.509	0.16	ATL
	PDXK	1.7984e-121	4.74849e-117	0.650868	0.429	0.127	ATL
	LHFPL3	2.55131e-120	6.73648e-116	0.543606	0.358	0.09	ATL
	CTTNBP2	1.39066e-119	3.67191e-115	0.537686	0.4	0.109	ATL
	PLEKHH2	2.83068e-118	7.47413e-114	0.713364	0.483	0.158	ATL
	TBC1D4	1.22542e-115	3.23559e-111	1.0041	0.7	0.342	ATL
	GRHL2	2.07088e-115	5.46795e-111	0.610482	0.467	0.15	ATL
	EGFR	1.28763e-113	3.39986e-109	0.735422	0.514	0.179	ATL
	ATP13A4	9.91816e-111	2.61879e-106	0.177506	0.125	0.014	ATL
	CHL1	2.51037e-106	6.62838e-102	0.670281	0.407	0.123	ATL
	AC012593.1	2.18572e-105	5.77117e-101	0.544722	0.379	0.109	ATL
	AC092153.1	5.2083e-105	1.3752e-100	0.236186	0.149	0.02	ATL
	PRRG1	1.74428e-103	4.6056e-99	0.534587	0.384	0.114	ATL
	AC113383.1	1.1366e-102	3.00107e-98	0.252951	0.11	0.012	ATL
	DAPK1	5.41433e-101	1.4296e-96	0.663234	0.606	0.255	ATL
	RBPMS	6.96796e-101	1.83982e-96	0.883484	0.778	0.412	ATL
	WDFY3	7.41089e-101	1.95677e-96	0.813153	0.734	0.392	ATL
	COL4A2	5.78851e-100	1.5284e-95	0.716002	0.546	0.216	ATL
	CPVL	7.37406e-98	1.94705e-93	0.526026	0.366	0.107	ATL
	SLIT3	1.63353e-96	4.31317e-92	0.552405	0.233	0.049	ATL
	MYO1D	1.74597e-95	4.61007e-91	0.591867	0.48	0.175	ATL
	ADAMTS15	2.80719e-95	7.41211e-91	0.238022	0.136	0.019	ATL
	COL5A1	6.09935e-94	1.61047e-89	0.16279	0.109	0.012	ATL
	CPAMD8	2.18349e-93	5.76528e-89	0.235216	0.18	0.031	ATL
	AC004889.1	9.70739e-93	2.56314e-88	0.424418	0.327	0.092	ATL
	LRRC4C	3.41741e-91	9.02334e-87	0.530967	0.17	0.029	ATL
	AC111000.4	4.01377e-91	1.0598e-86	0.349319	0.216	0.044	ATL
	DNM3	2.64791e-88	6.99155e-84	0.622961	0.468	0.175	ATL
	COL4A1	8.62066e-88	2.2762e-83	0.559677	0.418	0.142	ATL
	UNC13C	1.25673e-87	3.31827e-83	0.481858	0.224	0.049	ATL
	NFAT5	2.11424e-87	5.58244e-83	0.960171	0.744	0.462	ATL
	PCAT1	2.61316e-87	6.89979e-83	0.928666	0.538	0.239	ATL
	HIST1H2BG	7.07807e-87	1.86889e-82	0.182685	0.131	0.019	ATL
	HUNK	9.84779e-87	2.60021e-82	0.321401	0.225	0.05	ATL
	PTPN14	2.70297e-86	7.13691e-82	0.642969	0.514	0.211	ATL
	IMMP2L	1.37739e-85	3.63686e-81	0.857587	0.925	0.757	ATL
	CDH2	3.1106e-85	8.21323e-81	0.595782	0.303	0.085	ATL
	AL022068.1	4.73934e-85	1.25138e-80	0.471237	0.245	0.059	ATL
	DSCAML1	8.79485e-85	2.32219e-80	0.738113	0.467	0.179	ATL
	NLGN1	1.70766e-84	4.5089e-80	0.65827	0.54	0.21	ATL
	CFAP221	2.95553e-84	7.80378e-80	0.621096	0.444	0.166	ATL
	ITGB6	6.55302e-83	1.73026e-78	0.553315	0.425	0.146	ATL
	AIF1L	1.5145e-81	3.99888e-77	0.395989	0.313	0.092	ATL
	FGFR1	1.96767e-81	5.19542e-77	0.388382	0.263	0.068	ATL
	GLI3	6.8194e-81	1.8006e-76	0.222163	0.156	0.027	ATL
	PTPN13	2.17388e-80	5.7399e-76	0.725191	0.635	0.315	ATL
	GALNT14	2.75008e-80	7.26131e-76	0.810095	0.512	0.223	ATL
	PARD3	5.28314e-80	1.39496e-75	0.674101	0.802	0.474	ATL
	NTN4	2.64841e-78	6.99287e-74	0.674971	0.442	0.171	ATL
	PGGHG	6.86803e-78	1.81344e-73	0.296093	0.232	0.055	ATL
	AC079352.1	4.40672e-77	1.16355e-72	0.600334	0.402	0.14	ATL
	AP001207.3	5.48889e-77	1.44929e-72	0.128094	0.091	0.01	ATL
	KAZN	1.36916e-76	3.61513e-72	0.617785	0.754	0.375	ATL
	LINC00240	4.17924e-76	1.10349e-71	0.29183	0.206	0.047	ATL
	WWC1	2.6291e-75	6.94187e-71	0.584187	0.562	0.258	ATL
	UNC5D	4.25425e-74	1.12329e-69	0.444491	0.207	0.048	ATL
	PRKD1	7.55328e-74	1.99437e-69	0.736298	0.652	0.337	ATL
	NUPR1	1.39208e-73	3.67564e-69	0.116561	0.07	0.007	ATL
	MAGI1	1.84644e-73	4.87534e-69	0.478251	0.836	0.519	ATL
	ZDHHC14	2.71203e-73	7.16084e-69	0.534672	0.548	0.245	ATL
	MAGI2	2.84736e-72	7.51816e-68	0.624215	0.616	0.31	ATL
	EHF	6.6656e-72	1.75998e-67	0.326955	0.238	0.062	ATL
	ALDH1A3	4.669e-71	1.2328e-66	0.106282	0.07	0.007	ATL
	SOGA1	2.80649e-70	7.41025e-66	0.346389	0.256	0.071	ATL
	DYNC2LI1	3.20439e-70	8.46086e-66	0.439138	0.353	0.124	ATL
	TSHZ2	4.63638e-70	1.22419e-65	0.37857	0.272	0.076	ATL
	ARMH4	5.76895e-70	1.52323e-65	0.30478	0.203	0.048	ATL
	TGFB2	1.51255e-69	3.99373e-65	0.21255	0.11	0.016	ATL
	CERCAM	2.94521e-69	7.77654e-65	0.106645	0.075	0.008	ATL
	SDC2	6.59526e-69	1.74141e-64	0.372947	0.266	0.077	ATL
	SPRY4-AS1	3.58595e-68	9.46834e-64	0.256902	0.183	0.041	ATL
	PPP1R14C	4.74574e-68	1.25306e-63	0.240764	0.159	0.032	ATL
	OR2A1-AS1	5.69865e-68	1.50467e-63	0.280866	0.204	0.05	ATL
	LINC00511	6.86439e-68	1.81247e-63	0.274927	0.16	0.033	ATL
	AL589935.1	2.87231e-66	7.58406e-62	0.570597	0.368	0.14	ATL
	PPFIBP1	6.88474e-66	1.81785e-61	0.562284	0.488	0.219	ATL
	LHFPL3-AS2	2.56347e-64	6.7686e-60	0.371727	0.264	0.079	ATL
	COLEC10	8.36067e-64	2.20755e-59	0.207118	0.138	0.026	ATL
	TBC1D16	1.00726e-63	2.65958e-59	0.381946	0.34	0.121	ATL
	ERMP1	1.00731e-63	2.65969e-59	0.406566	0.365	0.136	ATL
	LRRK2	1.16307e-63	3.07098e-59	0.666763	0.468	0.209	ATL
	CDR2	1.57455e-63	4.15745e-59	0.566257	0.502	0.234	ATL
	MAP3K1	1.20298e-62	3.17634e-58	0.5895	0.58	0.302	ATL
	HIPK2	1.84679e-62	4.87626e-58	0.672115	0.598	0.322	ATL
	P3H2	4.00453e-62	1.05736e-57	0.636678	0.533	0.256	ATL
	PARD3B	1.40666e-61	3.71414e-57	0.647513	0.713	0.435	ATL
	HES4	1.68049e-61	4.43717e-57	0.155586	0.105	0.017	ATL
	CRYAB	2.5109e-61	6.62977e-57	0.361924	0.173	0.04	ATL
	TRHDE	1.21042e-60	3.196e-56	0.522522	0.485	0.223	ATL
	HNF1B	1.59159e-60	4.20244e-56	0.491928	0.4	0.166	ATL
	LIPG	2.1029e-60	5.5525e-56	0.190991	0.143	0.029	ATL
	HYDIN	4.38458e-60	1.1577e-55	0.346397	0.277	0.09	ATL
	AC008554.1	9.77011e-60	2.5797e-55	0.439948	0.329	0.119	ATL
	AC090579.1	9.99543e-60	2.63919e-55	0.455149	0.31	0.11	ATL
	LINC01435	2.09486e-59	5.53128e-55	0.426096	0.151	0.032	ATL
	AC022872.1	5.59182e-59	1.47646e-54	0.262346	0.196	0.051	ATL
	DOCK1	1.91427e-58	5.05444e-54	0.558362	0.653	0.374	ATL
	COBLL1	3.84711e-58	1.01579e-53	0.516349	0.812	0.501	ATL
	PTGFR	4.93767e-57	1.30374e-52	0.253114	0.139	0.029	ATL
	ADAM10	8.18306e-57	2.16065e-52	0.629746	0.561	0.303	ATL
	KLHL29	1.72674e-56	4.55929e-52	0.323839	0.216	0.061	ATL
	MALAT1	4.99633e-56	1.31923e-51	0.404799	1	1	ATL
	LRRC63	5.57147e-56	1.47109e-51	0.100791	0.07	0.008	ATL
	MAPK10	1.06042e-55	2.79994e-51	0.593228	0.682	0.413	ATL
	CCDC198	3.13153e-55	8.26849e-51	0.478383	0.511	0.251	ATL
	DISP1	6.26242e-55	1.65353e-50	0.503222	0.394	0.168	ATL
	ASTN2	2.6706e-54	7.05147e-50	0.525069	0.481	0.23	ATL
	CHST9	4.33738e-54	1.14524e-49	0.392302	0.209	0.06	ATL
	TNFRSF11B	4.4951e-54	1.18689e-49	0.255995	0.159	0.038	ATL
	MIR99AHG	9.63011e-53	2.54273e-48	0.524721	0.627	0.358	ATL
	ACADL	1.16243e-52	3.06927e-48	0.289188	0.24	0.076	ATL
	ADGRF1	3.15175e-52	8.32188e-48	0.283886	0.225	0.069	ATL
	HOMER1	7.39303e-52	1.95206e-47	0.451627	0.266	0.092	ATL
	CASC19	1.34348e-51	3.54732e-47	0.264361	0.164	0.041	ATL
	FARP1	2.16781e-51	5.72389e-47	0.541985	0.695	0.429	ATL
	PRKCI	2.21486e-51	5.84811e-47	0.37675	0.353	0.143	ATL
	HOXA10	6.91267e-51	1.82522e-46	0.105922	0.076	0.011	ATL
	PHLDB1	1.98504e-50	5.24129e-46	0.253882	0.219	0.067	ATL
	GALNT18	3.7264e-50	9.83917e-46	0.495198	0.475	0.232	ATL
	MIR548A1HG	4.48781e-50	1.18496e-45	0.114997	0.065	0.008	ATL
	AC004870.4	6.74961e-50	1.78217e-45	0.307427	0.175	0.047	ATL
	TPST1	1.01408e-49	2.67759e-45	0.456246	0.485	0.241	ATL
	SASH1	1.20765e-49	3.18867e-45	0.420238	0.465	0.221	ATL
	PKP4	1.4845e-49	3.91968e-45	0.628838	0.708	0.444	ATL
	GLIS3	2.1557e-49	5.69192e-45	0.499289	0.663	0.398	ATL
	CNTN4	2.61509e-49	6.90489e-45	0.476659	0.423	0.189	ATL
	PLCB1	5.56006e-49	1.46808e-44	0.427531	0.674	0.347	ATL
	AKR1C1	1.08444e-48	2.86336e-44	0.126232	0.088	0.014	ATL
	SYNE1	1.44938e-48	3.82695e-44	0.481515	0.668	0.408	ATL
	LINC01159	1.86661e-48	4.92861e-44	0.156422	0.12	0.025	ATL
	SLC12A3	0	0	3.80713	0.998	0.045	DCT1
	AL355612.1	0	0	2.24248	0.908	0.099	DCT1
	TRPM7	0	0	1.99272	0.953	0.335	DCT1
	CNNM2	0	0	2.13473	0.89	0.19	DCT1
	ABCA5	0	0	1.65909	0.902	0.205	DCT1
	EGF	0	0	2.46858	0.92	0.195	DCT1
	WNK1	0	0	1.56132	0.95	0.367	DCT1
	RNPC3	0	0	1.92966	0.899	0.288	DCT1
	KANK1	0	0	1.58629	0.915	0.323	DCT1
	LINC00472	0	0	1.49663	0.974	0.496	DCT1
	APBB2	0	0	1.4883	0.914	0.299	DCT1
	TMEM52B	0	0	1.33425	0.811	0.071	DCT1
	ESRRG	0	0	1.40385	0.997	0.637	DCT1
	CPEB4	0	0	1.61033	0.885	0.316	DCT1
	KLHL3	0	0	1.40038	0.781	0.074	DCT1
	CACNB4	0	0	1.37478	0.789	0.105	DCT1
	TRPM6	0	0	1.94126	0.723	0.03	DCT1
	MECOM	0	0	1.3547	0.995	0.481	DCT1
	CA12	0	0	1.16588	0.881	0.263	DCT1
	ZNF385D	0	0	1.38851	0.739	0.092	DCT1
	TSC22D2	0	0	1.34617	0.821	0.247	DCT1
	ICA1	0	0	1.12471	0.762	0.145	DCT1
	KNG1	0	0	1.08848	0.767	0.122	DCT1
	FMN1	0	0	1.14051	0.793	0.172	DCT1
	CADM1	0	0	1.22941	0.789	0.179	DCT1
	DACH1	0	0	1.25589	0.821	0.2	DCT1
	COBLL1	0	0	1.07832	0.973	0.492	DCT1
	AC019197.1	0	0	1.28256	0.874	0.278	DCT1
	ARHGAP6	0	0	1.12051	0.917	0.395	DCT1
	FHOD3	0	0	1.0103	0.868	0.312	DCT1
	CACNA2D3	0	0	0.962761	0.895	0.267	DCT1
	ERBB4	0	0	0.986432	0.99	0.487	DCT1
	CCSER1	0	0	1.04313	0.988	0.606	DCT1
	NOS1AP	0	0	1.18553	0.747	0.183	DCT1
	ATP1B1	0	0	0.9939	0.899	0.348	DCT1
	COL4A3	0	0	1.01529	0.823	0.273	DCT1
	TSC22D1	0	0	1.16478	0.809	0.3	DCT1
	PIK3C2G	0	0	1.02003	0.707	0.1	DCT1
	MITF	0	0	0.965474	0.817	0.285	DCT1
	LINC01762	0	0	1.05647	0.762	0.185	DCT1
	AC078980.1	0	0	1.17254	0.624	0.041	DCT1
	PKP4	0	0	0.966999	0.904	0.434	DCT1
	TEX41	0	0	1.1378	0.691	0.116	DCT1
	GRB14	0	0	0.875994	0.725	0.172	DCT1
	FGF13	0	0	1.28477	0.7	0.172	DCT1
	EFNA5	0	0	0.918211	0.841	0.287	DCT1
	GPC5	0	0	1.07076	0.79	0.223	DCT1
	TOX3	0	0	1.01946	0.675	0.147	DCT1
	IVNS1ABP	0	0	0.891682	0.711	0.199	DCT1
	FREM1	0	0	0.818568	0.734	0.207	DCT1
	LHX1	0	0	0.845948	0.611	0.075	DCT1
	ADAMTS17	0	0	1.15148	0.617	0.101	DCT1
	FRMD3	0	0	1.04948	0.651	0.152	DCT1
	TMPRSS2	0	0	0.811057	0.634	0.114	DCT1
	ITPR1	0	0	0.916895	0.787	0.32	DCT1
	PDE10A	0	0	1.22446	0.709	0.224	DCT1
	CDK14	0	0	0.868503	0.798	0.335	DCT1
	AC138305.1	0	0	1.00596	0.696	0.202	DCT1
	OPHN1	0	0	0.820583	0.66	0.183	DCT1
	KL	0	0	0.979374	0.556	0.06	DCT1
	WDFY2	0	0	0.79951	0.738	0.267	DCT1
	CACNA1D	0	0	0.886779	0.674	0.198	DCT1
	ACSL4	0	0	0.976712	0.652	0.181	DCT1
	ABCA10	0	0	0.803301	0.547	0.067	DCT1
	ME3	0	0	0.808189	0.586	0.127	DCT1
	LINC01055	0	0	0.83318	0.492	0.02	DCT1
	HS6ST2	0	0	0.793217	0.594	0.121	DCT1
	COL4A5	0	0	0.740384	0.617	0.159	DCT1
	CA10	0	0	0.772408	0.577	0.115	DCT1
	ADGRL2	0	0	0.74019	0.639	0.214	DCT1
	IL1RAPL2	0	0	1.21591	0.482	0.059	DCT1
	ITPKB	0	0	0.646052	0.551	0.132	DCT1
	CPXM2	0	0	0.630211	0.457	0.035	DCT1
	CACHD1	0	0	0.692633	0.502	0.091	DCT1
	ATP6V0A4	0	0	0.684946	0.565	0.155	DCT1
	TMEM213	0	0	0.647166	0.527	0.117	DCT1
	GRAMD1B	0	0	0.581344	0.552	0.132	DCT1
	ESRRB	0	0	0.557592	0.572	0.156	DCT1
	TBC1D9	0	0	0.581645	0.558	0.155	DCT1
	PLPPR1	0	0	0.659359	0.535	0.138	DCT1
	UNC5C	0	0	0.932544	0.444	0.046	DCT1
	HMCN1	0	0	0.710812	0.477	0.084	DCT1
	EMX1	0	0	0.532692	0.437	0.047	DCT1
	DEPDC1B	0	0	0.671677	0.409	0.02	DCT1
	LINC01205	0	0	0.678457	0.407	0.024	DCT1
	SCN2A	0	0	0.636755	0.514	0.129	DCT1
	SCN7A	0	0	0.635371	0.482	0.102	DCT1
	VDR	0	0	0.625872	0.416	0.048	DCT1
	AMY2B	0	0	0.583341	0.41	0.042	DCT1
	TMEM101	0	0	0.559403	0.409	0.037	DCT1
	DNER	0	0	0.674441	0.402	0.037	DCT1
	SALL3	0	0	0.51468	0.381	0.015	DCT1
	LINC01182	0	0	0.648489	0.465	0.104	DCT1
	MYO1B	0	0	0.521531	0.45	0.097	DCT1
	KSR2	0	0	0.593851	0.414	0.073	DCT1
	SEMA6D	0	0	0.540359	0.45	0.105	DCT1
	LINC00645	0	0	0.729398	0.415	0.08	DCT1
	AC068631.1	0	0	0.495785	0.422	0.08	DCT1
	SLC24A3	0	0	0.501072	0.373	0.033	DCT1
	WNK4	0	0	0.473166	0.411	0.075	DCT1
	AL158071.3	0	0	0.530303	0.379	0.054	DCT1
	PTCHD1-AS	0	0	0.915212	0.335	0.037	DCT1
	TMTC1	0	0	0.72027	0.353	0.054	DCT1
	MARK1	0	0	0.45296	0.365	0.071	DCT1
	CALCR	0	0	0.994983	0.354	0.069	DCT1
	SLC19A3	0	0	0.43613	0.314	0.03	DCT1
	TNFRSF19	0	0	0.451135	0.35	0.067	DCT1
	FAM155A	0	0	0.796458	0.35	0.069	DCT1
	TRIM50	0	0	0.413325	0.29	0.008	DCT1
	ATP6V0D2	0	0	0.36388	0.35	0.065	DCT1
	SPOCK1	0	0	0.586185	0.307	0.035	DCT1
	LHX1-DT	0	0	0.381642	0.311	0.04	DCT1
	PID1	0	0	0.457184	0.32	0.049	DCT1
	GAD1	0	0	0.446164	0.305	0.041	DCT1
	SHC3	0	0	0.405621	0.28	0.016	DCT1
	PRSS23	0	0	0.414861	0.314	0.058	DCT1
	SLC9C1	0	0	0.391464	0.302	0.048	DCT1
	STAC	0	0	0.379071	0.292	0.049	DCT1
	AC117386.2	0	0	0.438867	0.273	0.03	DCT1
	SRRM4	0	0	0.532373	0.239	0.004	DCT1
	KCNN3	0	0	0.342204	0.277	0.045	DCT1
	ABCA9	0	0	0.365577	0.254	0.028	DCT1
	USP43	0	0	0.359173	0.262	0.037	DCT1
	LINC01896	0	0	0.312025	0.234	0.008	DCT1
	HOXD8	0	0	0.310886	0.249	0.028	DCT1
	C3orf52	0	0	0.314056	0.25	0.031	DCT1
	NPY1R	0	0	0.308185	0.245	0.028	DCT1
	ABCA6	0	0	0.324497	0.246	0.033	DCT1
	TCF24	0	0	0.312401	0.216	0.008	DCT1
	AC093895.1	0	0	0.399919	0.224	0.025	DCT1
	TMEM108	0	0	0.332221	0.212	0.022	DCT1
	PLEKHD1	0	0	0.241284	0.171	0.011	DCT1
	AMPH	0	0	0.25469	0.175	0.016	DCT1
	DIO2	0	0	0.244778	0.152	0.011	DCT1
	LINC01485	0	0	0.159345	0.108	0.005	DCT1
	LGR4	9.4321e-308	2.49045e-303	0.853056	0.78	0.325	DCT1
	GSDME	1.07935e-307	2.84992e-303	0.247926	0.192	0.022	DCT1
	PTGER3	9.64434e-307	2.54649e-302	0.738431	0.661	0.217	DCT1
	PLCL1	1.53854e-306	4.06237e-302	1.01112	0.911	0.456	DCT1
	AC016526.1	2.22956e-306	5.88693e-302	0.284753	0.223	0.03	DCT1
	ADAMTS16	7.95519e-306	2.10049e-301	0.538024	0.458	0.115	DCT1
	LINC00970	1.10548e-304	2.9189e-300	0.651904	0.519	0.144	DCT1
	TACC1	3.28266e-302	8.66754e-298	0.683716	0.682	0.245	DCT1
	AC040174.1	1.78082e-296	4.70209e-292	0.482583	0.434	0.106	DCT1
	CTDSPL	1.9641e-295	5.18602e-291	0.661223	0.648	0.229	DCT1
	INPP5J	2.92923e-295	7.73433e-291	0.23911	0.198	0.025	DCT1
	CALB1	3.0988e-294	8.18206e-290	0.519614	0.204	0.026	DCT1
	LIMCH1	5.81682e-291	1.53587e-286	0.69899	0.748	0.291	DCT1
	SLC12A2	2.06394e-290	5.44962e-286	0.474593	0.348	0.073	DCT1
	BACE2	2.80043e-289	7.39425e-285	0.698114	0.472	0.13	DCT1
	RNF150	3.9474e-289	1.04227e-284	0.644759	0.627	0.208	DCT1
	IDH2	1.51708e-285	4.0057e-281	0.484819	0.489	0.135	DCT1
	CADPS2	2.92375e-285	7.71987e-281	0.758118	0.73	0.287	DCT1
	PHF21B	1.74385e-283	4.60446e-279	0.410403	0.316	0.063	DCT1
	KCNJ16	3.01524e-283	7.96145e-279	0.522357	0.519	0.155	DCT1
	TFAP2A	3.40675e-283	8.99519e-279	0.263254	0.214	0.03	DCT1
	ZDHHC14	3.13647e-282	8.28155e-278	0.700118	0.657	0.237	DCT1
	BTBD11	1.99165e-281	5.25876e-277	0.494146	0.42	0.104	DCT1
	NOS1	2.12174e-280	5.60224e-276	0.402829	0.309	0.06	DCT1
	SAT1	2.73168e-279	7.21272e-275	0.664983	0.668	0.243	DCT1
	B4GALNT3	3.74899e-278	9.89884e-274	0.417959	0.323	0.066	DCT1
	UNC13C	1.86931e-274	4.93573e-270	0.506256	0.261	0.045	DCT1
	CLCNKB	4.27545e-274	1.12889e-269	0.413882	0.386	0.092	DCT1
	LINC00113	8.48179e-272	2.23953e-267	0.270588	0.182	0.023	DCT1
	KCNH1	1.50145e-271	3.96443e-267	0.267205	0.154	0.016	DCT1
	TRABD2B	3.18307e-271	8.40457e-267	0.575778	0.682	0.24	DCT1
	KITLG	3.50225e-268	9.24735e-264	0.583732	0.413	0.105	DCT1
	PDZRN3	1.0102e-267	2.66732e-263	0.601819	0.566	0.184	DCT1
	MALAT1	2.80992e-267	7.4193e-263	0.603468	1	1	DCT1
	MED12L	2.1344e-265	5.63566e-261	0.200221	0.15	0.016	DCT1
	EXPH5	8.46162e-264	2.2342e-259	0.420694	0.351	0.08	DCT1
	SIM1	1.32195e-263	3.49048e-259	0.543295	0.532	0.166	DCT1
	AL158071.1	6.88148e-261	1.81699e-256	0.244191	0.19	0.026	DCT1
	GALNT17	1.73006e-260	4.56806e-256	0.307239	0.256	0.044	DCT1
	HOXD3	7.81516e-260	2.06351e-255	0.483396	0.495	0.149	DCT1
	FXYD2	1.1427e-259	3.01719e-255	0.604413	0.588	0.201	DCT1
	CCDC148	2.1294e-258	5.62247e-254	0.654712	0.626	0.224	DCT1
	PIP5K1B	1.40464e-257	3.70881e-253	0.440978	0.423	0.111	DCT1
	FSTL4	1.08178e-256	2.85633e-252	0.405683	0.259	0.047	DCT1
	OLR1	1.62649e-255	4.29458e-251	0.172213	0.101	0.007	DCT1
	FHIT	2.84066e-255	7.50049e-251	0.83326	0.981	0.719	DCT1
	KCTD8	8.36254e-255	2.20805e-250	0.504183	0.396	0.101	DCT1
	IGFBP7	1.03465e-253	2.7319e-249	0.811826	0.722	0.302	DCT1
	COL4A6	3.142e-252	8.29614e-248	0.318685	0.226	0.036	DCT1
	SNX10	3.19252e-252	8.42954e-248	0.484544	0.468	0.136	DCT1
	ELOVL7	2.48405e-246	6.55888e-242	0.440021	0.42	0.115	DCT1
	DYNC2H1	5.59779e-245	1.47804e-240	0.747808	0.613	0.239	DCT1
	HMGCLL1	1.06757e-244	2.81882e-240	0.147571	0.101	0.008	DCT1
	GATA3	5.87758e-244	1.55192e-239	0.338201	0.326	0.072	DCT1
	HSD11B2	1.02831e-243	2.71515e-239	0.428144	0.495	0.146	DCT1
	DEFB1	5.41787e-242	1.43053e-237	0.422005	0.381	0.096	DCT1
	KCNH7	8.31591e-242	2.19573e-237	0.494457	0.141	0.016	DCT1
	SFRP1	9.72372e-239	2.56745e-234	0.34096	0.263	0.051	DCT1
	ADAMTS9	3.7725e-238	9.96091e-234	0.592542	0.571	0.202	DCT1
	CPEB2	5.7597e-238	1.52079e-233	0.629944	0.58	0.211	DCT1
	AC005208.1	5.9009e-238	1.55807e-233	0.566313	0.556	0.192	DCT1
	SH3PXD2A	6.35175e-238	1.67712e-233	0.353515	0.307	0.067	DCT1
[truncated: 9,803 more rows]

## Sheet: Supplementary Table 5
	Supplementary Table 5. Genes differentially expressed in healthy, injured and inflammatory tubular epithelial cells.
	Lists of differentially expressed genes between healthy, injured or inflammatory counterparts for different nephron segments. Differentially expressed genes are reported for PT (I. and II.), TAL (III. and IV.) and DCT, CNT and PC (V.-VII.) segments. P-values were calculated for genes expressed by at least 3% of cells in the cluster against all other cells using a Wilcoxon rank sum test and p-valu…
	I. PT Injured+PT Inflammatory (up) vs PT Healthy (PT S1-S3) (down)							II. PT Inflammatory (up) vs PT Injured (down)							III. TAL Injured+TAL Inflammatory (up) vs TAL Healthy (cTAL1, cTAL2, mTAL) (down)							IV. TAL Inflammatory (up) vs TAL Injured (down)							V. DCT Injured (up) vs DCT Healthy (DCT1, DCT2) (down)							VI. CNT Injured (up) vs DCT Healthy (CNT) (down)							VII. PC Injured (up) vs PC Healthy (cPC, mPC) (down)
	Gene	p-value	adj. p-value	Average L2FC	%Expressed - Celltype	%Expressed - Other		Gene	p-value	adj. p-value	Average L2FC	%Expressed - Celltype	%Expressed - Other		Gene	p-value	adj. p-value	Average L2FC	%Expressed - Celltype	%Expressed - Other		Gene	p-value	adj. p-value	Average L2FC	%Expressed - Celltype	%Expressed - Other		Gene	p-value	adj. p-value	Average L2FC	%Expressed - Celltype	%Expressed - Other		Gene	p-value	adj. p-value	Average L2FC	%Expressed - Celltype	%Expressed - Other		Gene	p-value	adj. p-value	Average L2FC	%Expressed - Celltype	%Expressed - Other
	KAZN	0	0	1.02753	0.482	0.083		TPM1	8.9097e-95	2.35252e-90	0.958313	0.803	0.417		PTGER3	0	0	-1.21311	0.17	0.712		SLC12A1	6.0408e-166	1.59501e-161	-1.37355	0.567	0.889		SLC12A3	5.93963e-301	1.5683e-296	2.48508	0.993	0.485		DLGAP1	1.07786e-130	2.84599e-126	-1.21704	0.019	0.467		MSC-AS1	9.23738e-165	2.43904e-160	-1.39561	0.055	0.736
	EBNA1BP2	0	0	-0.950441	0.165	0.677		CUBN	6.89507e-91	1.82057e-86	-1.58763	0.287	0.69		LINC01781	0	0	0.67106	0.383	0.052		CCSER1	4.94427e-113	1.30548e-108	-0.91342	0.834	0.946		EGF	4.55928e-280	1.20383e-275	3.34087	0.902	0.113		NLGN1	6.60375e-127	1.74365e-122	-1.66342	0.107	0.738		LINC01924	2.50387e-151	6.61121e-147	-1.94381	0.105	0.786
	AGBL4	0	0	1.04568	0.605	0.181		CLDN1	6.51452e-82	1.7201e-77	0.563023	0.323	0.048		LINC00970	0	0	-0.966794	0.092	0.576		PROM1	1.00221e-77	2.64624e-73	0.664703	0.675	0.365		ITGB6	6.51651e-260	1.72062e-255	-1.69856	0.1	0.698		MEGF11	2.61299e-125	6.89934e-121	-0.916193	0.013	0.425		KCNIP4	1.30962e-125	3.45792e-121	-2.17324	0.489	0.964
	FGGY	0	0	-1.06385	0.481	0.9		PSD3	9.44342e-80	2.49344e-75	0.688157	0.4	0.088		ATP1B1	0	0	-1.02801	0.471	0.886		NRP1	3.81283e-77	1.00674e-72	0.738489	0.557	0.247		KCNIP4	5.17058e-236	1.36524e-231	-2.26977	0.596	0.95		MSC-AS1	1.90612e-105	5.03293e-101	-0.946626	0.02	0.412		NDRG1	1.4544e-87	3.8402e-83	1.90901	0.799	0.22
	RHEX	0	0	1.47775	0.805	0.386		NFKBIZ	2.10861e-78	5.56758e-74	0.744381	0.576	0.205		ESRRG	0	0	-0.86632	0.953	0.995		BICC1	7.24239e-77	1.91228e-72	0.808633	0.92	0.827		DCDC2	3.98522e-188	1.05226e-183	-1.63541	0.585	0.927		PDE4D	1.22503e-98	3.23457e-94	1.47191	0.999	0.988		PDE4D	1.5793e-83	4.16999e-79	1.28594	0.989	0.935
	RBMS3	0	0	1.02115	0.567	0.151		SYTL2	1.59073e-76	4.20015e-72	0.863825	0.509	0.168		AC079352.1	0	0	1.29751	0.612	0.262		CA12	1.50303e-74	3.96859e-70	-0.707927	0.226	0.541		CNNM2	1.94219e-175	5.12816e-171	1.68438	0.847	0.363		LTF	1.67377e-96	4.41943e-92	-0.73771	0.004	0.296		NLGN1	7.27569e-78	1.92107e-73	-1.27688	0.173	0.662
	MME	0	0	-1.33818	0.278	0.795		ACSM2B	3.12403e-75	8.24868e-71	-1.07208	0.458	0.783		PAX8	0	0	0.904464	0.826	0.495		RBPMS	2.40824e-73	6.35873e-69	0.660703	0.858	0.658		TRPM6	1.28301e-174	3.38767e-170	1.69536	0.707	0.066		ITGB6	1.83937e-93	4.85667e-89	-1.42573	0.123	0.646		NRP1	4.36869e-75	1.15351e-70	-0.733859	0.023	0.362
	PROM1	0	0	0.728464	0.4	0.017		TNC	5.44961e-71	1.43891e-66	0.542567	0.243	0.026		ITGB6	0	0	2.05103	0.835	0.262		ADAMTS1	6.41342e-69	1.6934e-64	0.536695	0.409	0.132		DLGAP1	3.69457e-170	9.75514e-166	-1.04294	0.021	0.39		LINC01924	2.25826e-90	5.9627e-86	-1.63468	0.1	0.592		LINC01538	1.22818e-74	3.24288e-70	-0.520134	0.011	0.32
	AC098588.3	0	0	-1.15411	0.2	0.745		LRP2	1.82953e-69	4.83069e-65	-1.05241	0.605	0.845		PLCL1	0	0	-1.24496	0.556	0.903		TBC1D4	2.75821e-66	7.28277e-62	-0.606201	0.449	0.713		LINC01781	1.4943e-168	3.94554e-164	-0.736175	0.012	0.359		SPP1	4.0109e-88	1.05904e-83	-1.25733	0.072	0.533		DLGAP1	6.92349e-73	1.82808e-68	-0.873987	0.029	0.368
	PDZD2	0	0	-1.85196	0.191	0.918		PRICKLE1	4.04306e-63	1.06753e-58	0.863474	0.63	0.294		PPM1L	0	0	-0.87132	0.17	0.571		UGCG	8.74592e-63	2.30927e-58	0.620292	0.555	0.278		NLGN1	4.9246e-167	1.30029e-162	-1.46159	0.114	0.583		AC083837.1	1.37375e-85	3.62726e-81	-0.748859	0.04	0.429		HSD11B2	1.82893e-69	4.82909e-65	1.23097	0.855	0.439
	AGXT2	0	0	-0.862125	0.295	0.797		TRIO	2.33194e-62	6.15724e-58	0.72784	0.886	0.673		TNIK	0	0	0.469566	0.272	0.021		ERBB4	1.68535e-62	4.44999e-58	-0.660926	0.956	0.98		AL355612.1	1.39163e-160	3.67447e-156	1.52837	0.84	0.327		KCNIP4	1.19914e-83	3.16622e-79	-1.97366	0.782	0.971		AC019197.1	1.54585e-68	4.08165e-64	-1.32443	0.743	0.955
	DCDC2	0	0	1.24054	0.619	0.132		CXCL1	6.08112e-61	1.60566e-56	0.341029	0.17	0.009		NLGN1	0	0	0.911486	0.377	0.067		SYNE2	2.78293e-61	7.34806e-57	0.539252	0.941	0.856		AC083837.1	4.7596e-160	1.25673e-155	-0.689851	0.011	0.341		MMP7	4.23896e-76	1.11926e-71	-0.427135	0.009	0.271		SCN3A	2.04125e-60	5.38971e-56	-1.00536	0.209	0.626
	PLG	0	0	-1.15166	0.041	0.623		ACSM2A	2.88811e-60	7.62577e-56	-0.773697	0.742	0.913		KNG1	0	0	-0.863881	0.062	0.582		BBOX1	4.29363e-59	1.13369e-54	-0.8665	0.21	0.482		PROM1	1.3362e-159	3.52811e-155	-0.60785	0.01	0.337		HSD11B2	9.31767e-73	2.46024e-68	1.38672	0.887	0.379		AC110296.1	1.32021e-57	3.48587e-53	-0.593661	0.086	0.448
	ITGB8	0	0	1.61135	0.769	0.259		ITGB8	1.9849e-59	5.24094e-55	0.878967	0.902	0.729		PROM1	0	0	0.778428	0.485	0.115		KAZN	7.80204e-59	2.06005e-54	0.649057	0.945	0.855		LINC00511	2.18919e-158	5.78034e-154	-0.661086	0.011	0.337		AOAH	2.19038e-71	5.78348e-67	-0.551801	0.012	0.271		TNIK	1.48005e-57	3.90792e-53	-0.637822	0.089	0.46
	SUGCT	0	0	-0.874351	0.584	0.88		HDAC9	1.3532e-57	3.57299e-53	0.482643	0.308	0.068		KCNIP4	0	0	1.28168	0.946	0.693		WWC1	1.67533e-52	4.42353e-48	0.668349	0.653	0.43		WFDC2	1.06684e-154	2.81689e-150	-0.508546	0.014	0.344		WFDC2	2.25807e-69	5.9622e-65	-0.614399	0.073	0.471		WSB1	6.59459e-57	1.74123e-52	1.23827	0.917	0.73
	MSRA	0	0	-1.07463	0.456	0.877		TRPM3	3.74081e-54	9.87724e-50	-0.776191	0.455	0.732		SPP1	0	0	1.40618	0.527	0.132		PLCB1	2.46895e-50	6.51902e-46	-0.475727	0.934	0.967		VTCN1	8.24332e-153	2.17657e-148	-0.755061	0.006	0.311		RNF213	2.93302e-67	7.74434e-63	-0.915654	0.168	0.642		MMP7	5.66874e-55	1.49677e-50	-0.510286	0.02	0.279
	TRPM3	0	0	-0.898485	0.668	0.927		ITGA3	8.0952e-52	2.13746e-47	0.521418	0.403	0.135		CCSER1	0	0	-0.815729	0.903	0.984		FHL2	3.46379e-50	9.14578e-46	0.321313	0.217	0.044		KLHL3	1.17523e-151	3.10308e-147	1.11625	0.775	0.253		PROM1	3.32279e-62	8.77349e-58	-0.796846	0.093	0.492		ID2	3.73004e-54	9.84879e-50	1.77485	0.589	0.11
	ALDOB	0	0	-1.38698	0.108	0.724		SLC16A9	2.21417e-51	5.84629e-47	-0.732285	0.08	0.409		EGF	0	0	-2.70069	0.211	0.844		PAPPA2	5.96604e-50	1.57527e-45	-1.25086	0.17	0.408		KNG1	2.80314e-150	7.40142e-146	0.987909	0.752	0.173		GALNTL6	5.68364e-62	1.50071e-57	-0.864232	0.017	0.267		SCN2A	5.28505e-54	1.39546e-49	-0.938967	0.311	0.712
	CUBN	0	0	-1.72739	0.597	0.986		DCDC2	2.32348e-51	6.13492e-47	0.817514	0.801	0.563		DCDC2	0	0	1.08082	0.732	0.415		CLCN5	2.41584e-48	6.37877e-44	-0.518695	0.419	0.652		ABCA5	5.0581e-143	1.33554e-138	1.18687	0.821	0.373		TNIK	5.98768e-60	1.58099e-55	-0.445548	0.02	0.275		SYTL2	8.82974e-51	2.33141e-46	-0.95229	0.418	0.789
	SLC16A9	0	0	-1.34983	0.332	0.863		KCNQ3	4.31147e-51	1.1384e-46	0.813198	0.442	0.163		HIP1	0	0	-0.873677	0.461	0.804		MEGF11	5.8134e-48	1.53497e-43	0.476021	0.299	0.098		ATP11A	3.40642e-141	8.99432e-137	-0.500211	0.008	0.3		TRPM3	2.00532e-56	5.29485e-52	1.4322	0.857	0.471		RHEX	1.24706e-49	3.29273e-45	-0.768263	0.141	0.513
	SLC5A12	0	0	-1.68412	0.306	0.866		MMP7	1.68187e-50	4.44082e-46	0.472749	0.264	0.057		PLEKHA1	0	0	0.674031	0.545	0.194		ITGB3	4.70595e-47	1.24256e-42	0.34831	0.256	0.072		CADM1	2.66065e-133	7.02518e-129	1.09008	0.752	0.254		C12orf75	6.74652e-54	1.78135e-49	-0.473743	0.048	0.35		SCD5	6.7795e-49	1.79006e-44	-0.457924	0.036	0.306
	SLC22A6	0	0	-1.16118	0.119	0.73		PLCL1	8.74634e-49	2.30938e-44	-0.948174	0.297	0.623		NELL1	0	0	-1.22949	0.073	0.617		ARHGAP29	8.50836e-47	2.24655e-42	0.576339	0.735	0.529		ERBB4	1.62313e-132	4.28571e-128	-1.05842	0.985	0.988		LINC00511	9.02757e-53	2.38364e-48	-0.352704	0.011	0.212		NR4A1	3.7131e-48	9.80407e-44	1.14035	0.516	0.071
	GRAMD1B	0	0	-1.70318	0.081	0.783		GULP1	8.1765e-47	2.15892e-42	0.697816	0.713	0.457		TMPRSS4	0	0	0.641371	0.373	0.03		VMP1	3.59549e-45	9.49353e-41	0.515402	0.695	0.49		GPC5	2.79042e-129	7.36783e-125	1.61845	0.841	0.403		SYT16	1.98381e-52	5.23805e-48	-0.29849	0.008	0.196		MALT1	1.589e-46	4.19559e-42	-0.890574	0.114	0.445
	CRYL1	0	0	-0.895693	0.296	0.765		DGKH	2.52653e-46	6.67106e-42	0.576659	0.765	0.494		AL159156.1	0	0	-0.781085	0.165	0.592		UGT8	8.1742e-43	2.15832e-38	-0.451114	0.292	0.526		PLCL1	4.33258e-127	1.14397e-122	1.26437	0.883	0.523		CYP4Z1	1.05317e-51	2.7808e-47	-0.29123	0.004	0.175		KALRN	2.15618e-46	5.69318e-42	-0.671417	0.181	0.567
	TPM1	0	0	0.91758	0.506	0.097		SLC5A12	5.28868e-46	1.39642e-41	-0.834129	0.08	0.375		GPC5	0	0	-2.3772	0.302	0.872		COL7A1	1.59726e-42	4.21741e-38	0.275343	0.191	0.041		AC079352.1	3.8868e-124	1.02627e-119	-0.727319	0.017	0.298		TRPV5	4.8677e-51	1.28527e-46	-0.82481	0.083	0.421		PPFIBP1	1.7228e-45	4.54887e-41	-0.938536	0.343	0.703
	RAB11FIP3	0	0	-1.07908	0.532	0.911		TMEM178B	1.9468e-44	5.14034e-40	0.650192	0.724	0.456		SYNE2	0	0	0.837506	0.889	0.687		TRIO	7.07131e-42	1.86711e-37	0.48051	0.753	0.59		TEX41	1.31163e-123	3.46321e-119	1.18134	0.706	0.186		ARL15	1.98429e-50	5.23931e-46	1.15129	0.947	0.804		ITGB6	2.07479e-45	5.47827e-41	-0.759494	0.108	0.439
	LINC00671	0	0	-0.850481	0.263	0.736		ZNF804B	3.78348e-44	9.9899e-40	-0.863116	0.121	0.425		ESRRB	0	0	-0.988344	0.241	0.741		ASIC2	9.74107e-42	2.57203e-37	0.370992	0.312	0.114		RNPC3	2.78011e-119	7.34061e-115	1.36985	0.812	0.478		VTCN1	2.28872e-50	6.04314e-46	-0.659538	0.045	0.325		AC104035.1	2.2902e-45	6.04705e-41	-0.583325	0.101	0.43
	ACSF2	0	0	-0.933369	0.199	0.703		ESRRG	9.08311e-44	2.3983e-39	-0.632834	0.434	0.726		SLC12A1	0	0	-1.50043	0.764	0.993		ACPP	3.93591e-41	1.03924e-36	-0.451104	0.102	0.308		AC078980.1	2.91904e-118	7.70744e-114	1.03546	0.563	0.058		NPAS3	8.29832e-50	2.19109e-45	-0.679502	0.061	0.371		NFKBIZ	2.58485e-45	6.82504e-41	-0.611433	0.138	0.496
	DLGAP1	0	0	1.5134	0.548	0.042		NCEH1	1.21088e-42	3.19721e-38	0.69669	0.545	0.271		UMOD	0	0	-1.74138	0.194	0.866		MECOM	1.10034e-40	2.90535e-36	-0.44453	0.965	0.984		ITGB8	1.49624e-117	3.95067e-113	-0.553931	0.031	0.33		AC093898.1	1.12223e-47	2.96313e-43	-1.07989	0.123	0.488		MEGF11	4.47677e-45	1.18205e-40	-0.312332	0.005	0.19
	EPB41L3	0	0	-1.08264	0.366	0.82		AGXT2	2.90253e-42	7.66385e-38	-0.493695	0.078	0.361		WFDC2	0	0	0.611302	0.394	0.055		PPM1H	1.50326e-40	3.9692e-36	0.415149	0.534	0.314		MEGF11	1.97006e-117	5.20175e-113	-0.58343	0.008	0.253		RAPGEF5	4.2153e-47	1.11301e-42	-0.507272	0.045	0.317		AC083837.1	5.15882e-43	1.36213e-38	-0.4177	0.046	0.306
	RNF152	0	0	-1.39438	0.255	0.779		UBASH3B	5.65344e-42	1.49274e-37	0.281292	0.168	0.023		ADAMTS1	0	0	0.536482	0.239	0.009		NFKBIZ	2.14888e-40	5.6739e-36	0.399064	0.344	0.148		RAPGEF5	1.21014e-116	3.19526e-112	-0.642375	0.089	0.454		DCDC2	7.31497e-46	1.93144e-41	-1.05583	0.755	0.933		HES1	1.86701e-41	4.92964e-37	1.39419	0.606	0.234
	SLC13A3	0	0	-1.60015	0.269	0.91		STK39	6.66666e-41	1.76026e-36	0.37147	0.33	0.108		HS6ST2	7.50589e-308	1.98186e-303	-0.864802	0.208	0.606		PRICKLE1	2.35664e-40	6.22247e-36	0.323765	0.171	0.033		TMPRSS2	3.12533e-116	8.25212e-112	0.842665	0.657	0.173		COL7A1	8.71551e-46	2.30124e-41	-0.24653	0.004	0.154		TNFAIP2	1.77969e-40	4.69909e-36	-0.367998	0.025	0.24
	UPB1	0	0	-0.731691	0.082	0.535		MET	7.51953e-41	1.98546e-36	0.53137	0.666	0.394		CPEB3	3.00725e-304	7.94035e-300	-0.749743	0.375	0.731		TPM1	3.1287e-40	8.26102e-36	0.456819	0.413	0.209		LINC01320	9.13378e-115	2.41168e-110	-0.713195	0.099	0.475		ATP11A	1.02177e-45	2.69787e-41	-0.269146	0.008	0.179		MECOM	1.98021e-40	5.22854e-36	0.86787	0.97	0.932
	CYP4A11	4.04677e-307	1.06851e-302	-0.676368	0.046	0.483		HS3ST1	1.18269e-40	3.12278e-36	0.327036	0.263	0.068		ACACB	3.09329e-295	8.16752e-291	-0.662676	0.214	0.604		RANBP3L	9.45592e-39	2.49674e-34	-0.419744	0.164	0.379		KANK1	3.08389e-114	8.14271e-110	1.00054	0.897	0.635		SCD5	1.60512e-45	4.23817e-41	-0.711853	0.119	0.467		SLC8A1	2.1108e-39	5.57336e-35	-1.23083	0.201	0.543
	LINC02147	1.26297e-300	3.33473e-296	-1.01079	0.086	0.533		TNFAIP2	1.36312e-40	3.59918e-36	0.512695	0.429	0.181		GP2	1.85183e-294	4.88957e-290	-0.621411	0.083	0.467		NLGN1	1.076e-38	2.84107e-34	0.627956	0.512	0.292		TSC22D2	4.68809e-109	1.23784e-104	0.987632	0.815	0.43		MECOM	4.1475e-45	1.09511e-40	0.879495	0.99	0.963		DCDC2	1.29079e-38	3.40821e-34	-0.908615	0.714	0.902
	G6PC	8.85175e-300	2.33722e-295	-0.784751	0.024	0.443		FNDC3B	1.42314e-40	3.75767e-36	0.584063	0.83	0.65		VMP1	6.69942e-294	1.76891e-289	0.736316	0.569	0.235		DCDC2	1.73598e-38	4.58369e-34	0.557197	0.809	0.684		KL	1.20754e-108	3.18838e-104	0.938582	0.515	0.041		CFTR	8.50707e-45	2.24621e-40	-0.339588	0.009	0.179		BHLHE40	1.93101e-38	5.09863e-34	0.91488	0.688	0.347
	PPFIBP1	1.19866e-299	3.16493e-295	1.04842	0.716	0.332		RBMS3	1.54718e-40	4.08517e-36	0.628449	0.752	0.511		NRP1	5.20189e-293	1.37351e-288	0.714064	0.367	0.078		FNDC3B	5.38498e-38	1.42185e-33	0.483224	0.871	0.8		PDGFC	3.15028e-103	8.31801e-99	-0.48784	0.032	0.305		SNTG1	1.89988e-44	5.01644e-40	2.08805	0.543	0.033		THSD7A	6.35107e-38	1.67694e-33	0.899409	0.78	0.469
	MAP3K1	8.81942e-296	2.32868e-291	0.75344	0.504	0.11		APP	3.10221e-40	8.19108e-36	0.510204	0.746	0.516		CACNA2D3	2.48155e-290	6.55228e-286	-0.694488	0.779	0.934		HIF1A	6.39587e-38	1.68877e-33	0.525672	0.684	0.49		AL033504.1	4.97794e-102	1.31438e-97	-0.917258	0.304	0.713		NCMAP	2.61881e-44	6.9147e-40	-0.2424	0.008	0.175		ACTG1	9.26813e-38	2.44716e-33	0.775476	0.488	0.101
	ACSM2B	5.35043e-295	1.41273e-290	-0.93668	0.707	0.95		SLC47A1	3.73403e-40	9.85932e-36	-0.508064	0.258	0.546		LINC00511	6.12452e-275	1.61712e-270	0.433182	0.208	0.01		GLIS3	1.53471e-37	4.05226e-33	0.444035	0.856	0.733		CPEB4	2.93537e-100	7.75056e-96	1.05174	0.838	0.528		AC019080.1	3.96596e-44	1.04717e-39	1.46166	0.67	0.238		STAC2	2.2017e-37	5.81336e-33	-0.345899	0.008	0.172
	CASC15	2.8316e-291	7.47657e-287	0.826146	0.369	0.031		SLC13A3	5.11796e-40	1.35135e-35	-0.826316	0.067	0.33		ABCC3	1.38165e-274	3.6481e-270	0.337934	0.216	0.013		ADAM10	2.39063e-37	6.31222e-33	0.415123	0.573	0.363		TRPM7	3.63162e-99	9.58894e-95	1.04133	0.883	0.695		CCSER1	4.181e-44	1.10395e-39	0.905758	0.985	0.887		KIF26B	1.1357e-36	2.99869e-32	-0.709114	0.266	0.62
	SLC22A7	1.07736e-288	2.84466e-284	-0.806922	0.024	0.432		MACC1	7.34503e-40	1.93938e-35	0.615766	0.695	0.446		UGCG	2.48465e-273	6.56047e-269	0.623144	0.385	0.098		CYTOR	1.16755e-36	3.0828e-32	0.396268	0.422	0.218		WNK1	9.50424e-98	2.5095e-93	0.786965	0.958	0.783		MALT1	4.13727e-43	1.09241e-38	-0.701471	0.11	0.442		SQSTM1	1.54094e-36	4.06869e-32	1.73036	0.503	0.151
	SMIM2-AS1	4.43865e-288	1.17198e-283	-0.875589	0.326	0.747		SAMD4A	9.13543e-40	2.41212e-35	0.743177	0.68	0.427		SLC16A12	2.38919e-271	6.30841e-267	-0.841833	0.3	0.659		RALYL	1.86305e-36	4.91921e-32	-0.443577	0.069	0.242		MTHFD1L	3.59436e-96	9.49055e-92	-0.441658	0.034	0.296		TEX41	4.33366e-43	1.14426e-38	1.15241	0.838	0.496		RNF213	1.54848e-36	4.08862e-32	-0.690468	0.232	0.564
	CREB5	1.53748e-287	4.05957e-283	0.952448	0.585	0.176		SVIL	1.18761e-39	3.13576e-35	0.542516	0.728	0.476		PTPN4	3.42147e-269	9.03405e-265	-0.779293	0.357	0.686		TNS3	1.86341e-36	4.92016e-32	0.42265	0.644	0.445		RNF213	8.15796e-96	2.15403e-91	-0.687713	0.127	0.475		OSMR	6.29032e-43	1.6609e-38	-0.567603	0.093	0.412		ACTB	2.11214e-36	5.57689e-32	0.774566	0.478	0.098
	STOX2	8.35766e-287	2.20676e-282	0.852154	0.642	0.216		LINC00671	3.35757e-39	8.86532e-35	-0.491373	0.06	0.325		DGKH	1.22987e-267	3.24735e-263	0.637063	0.575	0.238		SDK1	4.00138e-36	1.05652e-31	0.507722	0.492	0.283		SASH1	5.98535e-95	1.58037e-90	-0.640774	0.125	0.47		NFKBIZ	1.06834e-42	2.82085e-38	-0.586811	0.086	0.4		NEAT1	1.54191e-35	4.07125e-31	0.817362	0.99	0.97
	AFM	1.16401e-285	3.07345e-281	-0.74674	0.046	0.463		FOSL2	7.62856e-39	2.01424e-34	0.321953	0.295	0.09		FYB1	1.04522e-266	2.75979e-262	0.377924	0.241	0.024		DIAPH3	1.12654e-35	2.97452e-31	0.363123	0.299	0.121		PLCB1	3.58696e-94	9.47102e-90	-0.733808	0.046	0.318		AC079352.1	5.45705e-42	1.44088e-37	-0.484306	0.036	0.271		ADAMTS16	3.75065e-35	9.90322e-31	-0.735981	0.273	0.608
	LINC01060	3.00214e-281	7.92685e-277	-1.14053	0.29	0.69		CYTOR	9.83958e-39	2.59804e-34	0.377107	0.302	0.096		RBFOX1	1.62111e-261	4.28038e-257	-0.988911	0.344	0.685		BNC2	1.15493e-34	3.04947e-30	0.376038	0.414	0.211		MMS22L	1.59528e-93	4.21219e-89	-0.839903	0.099	0.417		MALAT1	8.52669e-42	2.25139e-37	0.543844	1	1		DGKH	2.35274e-34	6.21218e-30	-0.598132	0.141	0.439
	DCC	3.97301e-280	1.04903e-275	1.36015	0.416	0.062		IL18	1.02951e-38	2.71831e-34	0.305308	0.259	0.07		PHACTR3	8.88695e-260	2.34651e-255	0.378414	0.24	0.025		HDAC9	3.42419e-34	9.04122e-30	0.453231	0.375	0.187		ESRRG	6.41765e-93	1.69452e-88	0.626067	0.997	0.971		ADAMTS1	9.81252e-42	2.5909e-37	-0.30084	0.013	0.188		AC093898.1	1.33635e-33	3.52849e-29	-1.06086	0.158	0.46
	AK4	1.90479e-277	5.0294e-273	-0.782776	0.269	0.692		SGPP2	1.24386e-38	3.28429e-34	0.399958	0.32	0.107		MGAT5	6.59642e-256	1.74172e-251	-0.736928	0.268	0.618		TNFSF10	3.80438e-34	1.00451e-29	0.324159	0.282	0.112		C12orf75	3.30531e-91	8.72734e-87	-0.397246	0.022	0.253		ABCC4	8.48687e-41	2.24087e-36	-0.349548	0.024	0.229		TNFRSF11B	3.11778e-32	8.2322e-28	-0.357065	0.027	0.211
	EHHADH	3.14776e-275	8.31136e-271	-0.73625	0.274	0.694		VMP1	1.94587e-38	5.13789e-34	0.48545	0.804	0.55		CYFIP2	1.0172e-254	2.68581e-250	-0.706788	0.29	0.637		SPP1	1.08752e-33	2.87148e-29	0.622671	0.641	0.455		STOX2	8.54134e-91	2.25526e-86	-0.583983	0.11	0.435		MET	1.9187e-40	5.06614e-36	-0.406355	0.046	0.296		HMGCS1	5.21249e-32	1.37631e-27	1.57084	0.406	0.071
	SLC4A4	1.54475e-274	4.07876e-270	-1.08463	0.486	0.825		IFNAR2	2.66587e-38	7.03896e-34	0.44613	0.432	0.19		LINC01762	1.27363e-254	3.3629e-250	-0.751081	0.343	0.703		AL159156.1	1.43083e-33	3.77796e-29	-0.371004	0.064	0.229		PAX8	7.15122e-89	1.88821e-84	-0.779852	0.379	0.727		AC110296.1	2.63538e-40	6.95846e-36	-0.533967	0.133	0.475		PDE10A	7.28477e-31	1.92347e-26	1.55927	0.517	0.199
	TPCN1	7.61633e-274	2.01102e-269	-0.757835	0.276	0.69		LINC01622	8.74827e-38	2.30989e-33	-0.581281	0.113	0.384		LINC02343	7.0914e-254	1.87241e-249	-0.800003	0.181	0.541		TMPRSS4	8.47141e-33	2.23679e-28	-0.414259	0.254	0.449		WDFY2	1.23318e-88	3.25608e-84	0.752378	0.716	0.312		PPFIBP1	2.71565e-40	7.17041e-36	-0.960461	0.363	0.733		SPP1	9.12664e-31	2.4098e-26	-0.590652	0.027	0.205
	LIN52	1.24876e-271	3.29722e-267	-0.769065	0.152	0.572		LMCD1	1.40135e-37	3.70014e-33	0.475791	0.24	0.063		ARHGEF38	2.70195e-241	7.13422e-237	0.714049	0.694	0.422		PAX8	1.42486e-32	3.76219e-28	0.404746	0.883	0.791		NR1H4	1.35588e-87	3.58006e-83	-0.297051	0.008	0.2		FAM155A	9.37448e-39	2.47524e-34	-0.849642	0.179	0.558		ADGRG6	1.48148e-30	3.91171e-26	-0.239824	0.023	0.196
	NRG3	1.05601e-267	2.78828e-263	1.09014	0.568	0.177		RAPGEF5	2.23861e-37	5.91084e-33	0.526681	0.316	0.109		AC083837.1	1.46603e-238	3.8709e-234	0.619435	0.429	0.139		VAV3	2.01286e-32	5.31476e-28	-0.403137	0.483	0.679		AC110296.1	1.96706e-87	5.19382e-83	-0.48093	0.078	0.376		TNFAIP2	1.1382e-38	3.0053e-34	-0.205006	0.001	0.117		MSMO1	2.6356e-30	6.95904e-26	0.959724	0.353	0.036
	CDH6	1.09425e-265	2.88926e-261	1.51457	0.729	0.439		SLC13A1	2.84622e-37	7.51515e-33	-0.699559	0.238	0.541		FNDC3B	1.54469e-238	4.0786e-234	0.734945	0.827	0.624		IGFBP7	1.03477e-31	2.73221e-27	0.537688	0.679	0.507		HYDIN	1.07627e-84	2.84179e-80	-0.361502	0.04	0.289		LINC01099	2.42063e-38	6.39144e-34	1.16866	0.789	0.429		WFDC2	3.06719e-30	8.0986e-26	-0.416093	0.143	0.43
	AL110292.1	9.57426e-264	2.52799e-259	-0.857826	0.123	0.537		RMST	5.07448e-37	1.33986e-32	-0.690958	0.29	0.55		AC124017.1	7.77115e-238	2.05189e-233	-0.605618	0.044	0.363		RNF213	8.48648e-31	2.24077e-26	0.365062	0.524	0.331		OSMR	2.12257e-84	5.60442e-80	-0.503241	0.088	0.387		ALDH1A2	3.61945e-38	9.55679e-34	-0.427385	0.047	0.288		FOS	4.66573e-30	1.23194e-25	0.581553	0.367	0.045
	MFSD4B	2.72012e-263	7.1822e-259	-0.821514	0.516	0.823		ANXA2	3.13656e-35	8.28177e-31	0.346761	0.333	0.123		HIF1A	5.63422e-236	1.48766e-231	0.927803	0.565	0.278		SCN7A	8.86098e-31	2.33965e-26	-0.457498	0.153	0.334		FHOD3	3.10517e-84	8.19889e-80	0.728375	0.863	0.566		KIF26B	5.38587e-38	1.42209e-33	-0.760538	0.181	0.537		SCTR	6.8101e-30	1.79814e-25	-0.229	0.003	0.122
	PLCB4	4.48584e-257	1.18444e-252	0.828876	0.352	0.037		PAH	1.0928e-34	2.88542e-30	-0.618525	0.117	0.368		AC092078.2	1.12439e-235	2.96884e-231	-0.779489	0.026	0.33		COL4A2	2.75014e-30	7.26147e-26	0.409037	0.464	0.283		RBPMS	9.97065e-83	2.63265e-78	-0.836008	0.507	0.791		ST5	7.68704e-38	2.02969e-33	-0.627058	0.122	0.438		PTMA	9.20114e-30	2.42947e-25	0.832401	0.496	0.166
	SLC6A13	1.6546e-256	4.3688e-252	-0.673298	0.189	0.603		SEMA3C	1.87883e-34	4.96087e-30	0.30168	0.176	0.035		OSMR	2.85187e-229	7.53007e-225	0.453785	0.353	0.093		ITGAV	8.02525e-30	2.11899e-25	0.328938	0.388	0.208		FMN1	1.29639e-82	3.42298e-78	0.766871	0.749	0.385		DGKH	9.55446e-38	2.52276e-33	-0.454361	0.076	0.358		ARL15	1.71297e-29	4.52292e-25	0.724422	0.872	0.703
	PPARA	7.93134e-254	2.09419e-249	-0.766397	0.352	0.731		MYO5B	2.2539e-34	5.95121e-30	0.595681	0.568	0.331		TMEM72-AS1	5.17265e-227	1.36579e-222	-0.539345	0.028	0.325		CPD	1.44125e-29	3.80547e-25	0.403678	0.359	0.191		BBOX1	5.21899e-81	1.37802e-76	-0.525849	0.01	0.193		SEMA6D	1.90658e-37	5.03412e-33	-0.507225	0.033	0.242		TNFRSF19	1.37504e-28	3.63066e-24	-0.444484	0.079	0.306
	PCK1	7.2439e-253	1.91268e-248	-0.708335	0.062	0.455		RAB11FIP3	2.33303e-34	6.16013e-30	-0.61865	0.349	0.588		PPARGC1A	4.07258e-226	1.07532e-221	-0.63975	0.403	0.726		PROSER2	3.29871e-29	8.70992e-25	0.276973	0.22	0.08		PLEKHA1	5.69031e-81	1.50247e-76	-0.645141	0.175	0.501		ARHGAP29	2.12123e-37	5.6009e-33	-0.794344	0.37	0.725		PLEKHH2	1.60932e-28	4.24924e-24	-0.616438	0.245	0.531
	ERRFI1	9.67769e-248	2.5553e-243	-1.06325	0.192	0.59		KLF6	4.65232e-34	1.2284e-29	0.444966	0.638	0.37		ST6GAL1	4.34775e-222	1.14798e-217	0.396105	0.285	0.057		STK32B	4.51416e-29	1.19192e-24	-0.403816	0.326	0.507		ST6GAL1	7.01358e-81	1.85187e-76	-0.56462	0.133	0.454		CYTOR	3.61101e-37	9.53451e-33	-0.517139	0.119	0.438		INSIG1	1.87459e-28	4.94968e-24	0.995286	0.307	0.012
	VCAM1	1.12422e-246	2.9684e-242	0.765407	0.326	0.029		MIR4435-2HG	7.82509e-34	2.06614e-29	0.343452	0.297	0.103		MEGF11	1.1171e-220	2.94959e-216	0.375376	0.176	0.011		NUAK2	5.18504e-29	1.36906e-24	0.266057	0.2	0.067		CMTM7	1.25546e-80	3.31491e-76	-0.333721	0.021	0.231		CFAP221	4.20268e-37	1.10968e-32	-0.569952	0.198	0.567		SYT16	2.14643e-28	5.66744e-24	-0.238006	0.016	0.163
	PTH1R	1.18683e-245	3.13372e-241	-0.697584	0.28	0.709		UGCG	4.34582e-33	1.14747e-28	0.497791	0.713	0.493		PRDM16-DT	9.90805e-220	2.61612e-215	-0.498627	0.069	0.379		HS3ST1	9.28083e-29	2.45051e-24	0.246371	0.213	0.076		CA12	3.28992e-80	8.6867e-76	0.739337	0.883	0.604		NRP1	9.97935e-37	2.63495e-32	-0.680434	0.153	0.492		ITGB3	2.9304e-28	7.73742e-24	-0.212978	0.007	0.134
	UGT2B7	4.04611e-244	1.06834e-239	0.863274	0.796	0.482		DLGAP1	8.86165e-33	2.33983e-28	0.639328	0.724	0.494		BHLHE40	1.29603e-219	3.42205e-215	0.437735	0.263	0.047		TNFAIP2	1.36763e-28	3.6111e-24	0.233473	0.191	0.062		LINC00970	3.92997e-80	1.03767e-75	0.775593	0.533	0.13		THSD7A	1.79747e-35	4.74604e-31	0.985053	0.73	0.346		EGR1	3.27705e-28	8.65272e-24	0.511764	0.338	0.036
	BHMT	1.31758e-240	3.47895e-236	-0.890991	0.301	0.688		GLYAT	1.13125e-32	2.98696e-28	-0.45336	0.272	0.534		ELF3	2.8605e-216	7.55288e-212	0.364239	0.219	0.028		SEMA5B	2.47899e-28	6.54553e-24	0.175261	0.146	0.036		BNC2	1.09204e-77	2.88343e-73	-0.352009	0.015	0.204		STAT1	1.79751e-35	4.74615e-31	-0.516098	0.117	0.425		ST3GAL4	3.60619e-28	9.52179e-24	0.712684	0.363	0.056
	FAM110B	1.2389e-237	3.2712e-233	0.606956	0.337	0.039		PROSER2	1.2575e-32	3.32031e-28	0.28116	0.258	0.08		PSD3	4.25748e-216	1.12414e-211	0.418554	0.248	0.041		COL4A1	2.53054e-28	6.68164e-24	0.382505	0.344	0.179		ADAMTS1	1.70758e-77	4.5087e-73	-0.305333	0.004	0.166		PRICKLE1	6.21833e-35	1.64189e-30	-0.450535	0.025	0.208		CYFIP2	4.69247e-28	1.239e-23	0.626681	0.535	0.205
	BHMT2	1.7981e-237	4.7477e-233	-0.684858	0.452	0.787		HNF1A-AS1	1.42167e-32	3.75378e-28	-0.497663	0.241	0.502		AC131944.1	2.15199e-215	5.68211e-211	0.516635	0.237	0.037		AC024022.1	4.37113e-28	1.15415e-23	-0.26944	0.092	0.251		DIAPH3	5.17664e-77	1.36684e-72	-0.352716	0.02	0.221		EFEMP1	2.34185e-34	6.18343e-30	-0.262368	0.01	0.15		SDK1	1.33823e-27	3.53345e-23	-0.68423	0.613	0.837
	MIOX	1.19008e-236	3.14228e-232	-0.700904	0.09	0.471		GLIS3	5.88635e-32	1.55423e-27	0.556249	0.887	0.756		LINC01811	7.97327e-214	2.10526e-209	0.953941	0.18	0.014		TFCP2L1	6.40637e-28	1.69154e-23	-0.403192	0.542	0.7		MET	1.40423e-76	3.70774e-72	-0.452111	0.044	0.279		EFNB2	2.9767e-34	7.85967e-30	-0.159961	0.003	0.117		TRPM3	1.43943e-27	3.80067e-23	0.835865	0.876	0.78
	KIF26B	1.20299e-235	3.17638e-231	0.662351	0.335	0.038		KCNJ15	8.3875e-32	2.21464e-27	-0.755985	0.44	0.664		XKR4	2.41446e-209	6.37515e-205	0.318883	0.155	0.006		AC068234.2	8.78462e-28	2.31949e-23	0.193851	0.154	0.042		NFKBIZ	1.46422e-76	3.86614e-72	-0.336843	0.019	0.217		TNFSF10	5.77004e-34	1.52352e-29	-0.244228	0.009	0.146		FBN1	2.98328e-27	7.87705e-23	-0.303927	0.032	0.205
	TNFSF10	3.39135e-235	8.95453e-231	0.722697	0.472	0.125		XYLB	9.78814e-32	2.58446e-27	-0.414452	0.152	0.402		BBOX1	6.74353e-209	1.78056e-204	0.794002	0.377	0.121		ITGB6	1.11257e-27	2.93764e-23	0.496068	0.874	0.81		MAML2	1.95071e-76	5.15064e-72	0.801127	0.937	0.79		TPM1	8.4032e-34	2.21878e-29	-0.440273	0.083	0.35		LINC02778	3.18587e-27	8.41196e-23	-0.26941	0.034	0.208
	ASS1	6.68653e-235	1.76551e-230	-0.860149	0.191	0.573		NT5DC3	1.2328e-31	3.25509e-27	0.303762	0.235	0.07		PLPPR1	1.76634e-207	4.66385e-203	-0.517919	0.106	0.418		CLCNKB	1.51135e-27	3.99057e-23	-0.196859	0.041	0.173		LTF	3.02468e-76	7.98637e-72	-0.395292	0.004	0.163		CTTNBP2	9.66414e-34	2.55172e-29	-0.270235	0.017	0.179		PSD3	4.07375e-27	1.07563e-22	-0.463636	0.152	0.424
	LINC01020	1.4137e-231	3.73274e-227	-0.680843	0.135	0.54		PROM1	1.32412e-31	3.49621e-27	0.486629	0.584	0.344		LTF	1.4257e-204	3.76441e-200	0.402056	0.153	0.007		UGT2B7	1.69063e-27	4.46394e-23	0.39694	0.52	0.327		NELL1	1.06662e-75	2.8163e-71	0.928206	0.457	0.079		PIK3C2G	1.29139e-33	3.40978e-29	0.894687	0.876	0.662		DDIT3	4.11072e-27	1.0854e-22	0.669064	0.336	0.039
	WDR72	6.19316e-230	1.63524e-225	-0.872571	0.666	0.864		VCL	2.21092e-31	5.83772e-27	0.342454	0.281	0.098		RP1	1.45341e-199	3.83759e-195	-0.738888	0.317	0.615		KIF26B	3.61317e-27	9.54021e-23	0.319238	0.241	0.098		SYT16	1.07476e-75	2.83778e-71	-0.274515	0.005	0.166		PSD3	2.30498e-33	6.08607e-29	-0.491647	0.054	0.283		COL7A1	5.9289e-27	1.56547e-22	-0.177072	0.002	0.107
	NFKBIZ	5.65126e-228	1.49216e-223	0.577683	0.291	0.022		SOD2	3.29423e-31	8.69807e-27	0.717237	0.498	0.279		CREB5	3.07047e-198	8.10727e-194	0.396574	0.248	0.046		AJAP1	3.91061e-27	1.03256e-22	0.322006	0.183	0.061		CHL1	4.56286e-75	1.20478e-70	-0.364241	0.009	0.181		CD74	3.32414e-33	8.77706e-29	-0.258897	0.029	0.217		ZPLD1	9.11707e-27	2.40727e-22	-0.493389	0.01	0.136
	AC087482.1	4.17377e-227	1.10204e-222	-0.615349	0.128	0.514		ITGB6	4.69615e-31	1.23997e-26	0.443042	0.362	0.154		MACC1	4.7002e-198	1.24104e-193	0.53514	0.392	0.136		FKBP5	5.77422e-27	1.52463e-22	-0.475283	0.183	0.354		AC002460.2	2.92513e-74	7.72351e-70	-0.74799	0.233	0.573		LINC01098	1.33528e-32	3.52566e-28	0.958632	0.663	0.254		PRKAG2	9.52283e-27	2.51441e-22	0.732445	0.804	0.617
	GRIP1	8.2117e-226	2.16822e-221	0.687046	0.467	0.125		TINAG	5.0409e-31	1.331e-26	-0.613579	0.318	0.556		SEMA6D	2.63138e-196	6.9479e-192	-0.529376	0.147	0.453		SLC34A2	1.15161e-26	3.04071e-22	0.170552	0.124	0.027		TNIK	2.03178e-73	5.36471e-69	-0.297683	0.007	0.169		LRRC4C	3.18675e-32	8.41428e-28	-0.303005	0.028	0.208		CHL1	1.76034e-26	4.64801e-22	-0.297661	0.039	0.217
	AC087762.1	9.34535e-226	2.46755e-221	-0.733697	0.28	0.681		CREB5	1.99699e-30	5.27285e-26	0.617931	0.75	0.535		CD44	2.66028e-195	7.02421e-191	0.292453	0.176	0.016		SOD2	1.44989e-26	3.82829e-22	0.419473	0.332	0.175		CA10	4.7386e-73	1.25118e-68	0.686298	0.5	0.12		KALRN	3.52984e-32	9.32018e-28	-0.620336	0.129	0.425		AC079352.1	2.75744e-26	7.28075e-22	-0.359099	0.016	0.157
	KCNK5	2.5338e-224	6.69026e-220	-0.71838	0.125	0.498		TNFSF10	1.2034e-29	3.17747e-25	0.514339	0.638	0.422		CACNB2	6.0764e-193	1.60441e-188	-0.665268	0.16	0.462		C3	1.5496e-26	4.09156e-22	0.178974	0.109	0.02		ARHGAP29	2.54952e-72	6.73176e-68	-0.752881	0.289	0.608		WSB1	5.19845e-32	1.3726e-27	0.863125	0.895	0.742		PROM1	2.8829e-26	7.61202e-22	-0.537149	0.261	0.54
	SLC27A2	3.19104e-222	8.42563e-218	-0.762505	0.201	0.581		PLEKHH2	1.22405e-29	3.23198e-25	0.451061	0.39	0.181		UGT2B7	1.73912e-192	4.59197e-188	0.611561	0.402	0.145		OXR1	2.35092e-26	6.20738e-22	0.430567	0.905	0.841		FAM20A	3.46541e-71	9.15008e-67	-0.377658	0.032	0.239		ATP1B1	1.68449e-29	4.44772e-25	0.855661	0.848	0.667		TRPA1	3.28882e-26	8.6838e-22	-0.165756	0.005	0.119
	AL162725.2	1.05152e-221	2.77643e-217	-0.717714	0.029	0.367		ACTN1	1.96277e-29	5.1825e-25	0.331837	0.305	0.119		MAST4	9.04265e-192	2.38762e-187	-0.594604	0.537	0.795		PARD3	4.92855e-26	1.30133e-21	0.322636	0.83	0.725		MACC1	3.49451e-71	9.2269e-67	-0.486358	0.066	0.316		WNK1	3.14996e-29	8.31715e-25	0.840035	0.802	0.521		OSMR	4.28296e-26	1.13087e-21	-0.446873	0.093	0.315
	APP	3.33448e-221	8.80436e-217	0.677408	0.57	0.219		BHMT2	2.50991e-29	6.62718e-25	-0.416691	0.266	0.508		MPC1	2.60603e-191	6.88095e-187	-0.469203	0.162	0.466		WNK4	1.19877e-25	3.16523e-21	-0.18752	0.025	0.14		GRAMD1B	4.05931e-71	1.07182e-66	0.679799	0.473	0.102		KAZN	4.36655e-29	1.15295e-24	-0.908955	0.782	0.925		ATF3	5.94783e-26	1.57047e-21	0.712107	0.286	0.012
	KCTD16	4.19072e-221	1.10652e-216	0.723961	0.334	0.044		FMNL2	3.77321e-29	9.96279e-25	0.614394	0.723	0.525		ITGB3	4.58284e-189	1.21005e-184	0.244665	0.143	0.006		CYP24A1	2.12129e-25	5.60106e-21	0.239441	0.08	0.008		SAMD5	4.28989e-71	1.1327e-66	-0.587177	0.208	0.533		EHF	8.49162e-29	2.24213e-24	-0.38036	0.07	0.3		STAT1	6.84276e-26	1.80676e-21	-0.497482	0.194	0.469
	ITGAV	1.89424e-219	5.00154e-215	0.664758	0.422	0.101		AC003044.1	4.37691e-29	1.15568e-24	-0.64805	0.241	0.474		THSD4	7.08087e-187	1.86963e-182	-0.820224	0.204	0.494		TMEM51	2.75324e-25	7.26964e-21	0.220208	0.297	0.141		ELF3	7.96968e-71	2.10431e-66	-0.2975	0.013	0.185		ADGRG6	8.80149e-29	2.32395e-24	-0.180545	0.013	0.146		C12orf75	9.29105e-26	2.45321e-21	-0.339682	0.095	0.323
	UGCG	6.3955e-218	1.68867e-213	0.750393	0.544	0.198		MME	6.75846e-29	1.7845e-24	-0.51382	0.106	0.33		RNF144B	4.22797e-186	1.11635e-181	0.580156	0.401	0.15		ATP1B1	6.64517e-25	1.75459e-20	-0.370725	0.362	0.54		XKR4	1.67099e-70	4.41209e-66	-0.332592	0.011	0.177		C3	1.65321e-28	4.36512e-24	-0.155509	0.003	0.096		SREBF2	1.15862e-25	3.05921e-21	0.575736	0.537	0.231
	CYP4F3	2.36892e-216	6.25491e-212	-0.527305	0.073	0.429		HAVCR1	1.00951e-28	2.66552e-24	0.423154	0.517	0.292		RBPMS	1.52658e-184	4.03078e-180	0.709673	0.735	0.53		LTF	1.73145e-24	4.57171e-20	0.371889	0.237	0.101		CEMIP2	6.50903e-70	1.71864e-65	-0.314468	0.027	0.227		PAX8	2.45374e-28	6.47886e-24	-0.702632	0.711	0.896		ARHGEF38	1.1684e-25	3.08504e-21	-0.470554	0.181	0.451
	TMEM178B	1.24004e-215	3.27419e-211	0.803222	0.519	0.176		ADAMTS9-AS1	1.35449e-28	3.5764e-24	-0.514334	0.604	0.765		VCAN	1.95923e-184	5.17315e-180	0.359407	0.152	0.01		SAMD4A	1.90053e-24	5.01815e-20	0.521622	0.544	0.407		TOX3	7.93041e-70	2.09394e-65	0.757292	0.713	0.369		FRAS1	2.60153e-28	6.86908e-24	0.789463	0.87	0.662		CTTNBP2	1.36923e-25	3.61533e-21	-0.201847	0.016	0.154
	P4HA2	7.30397e-215	1.92854e-210	-0.540871	0.105	0.472		RASAL2	1.59393e-28	4.20862e-24	0.467095	0.685	0.469		ANXA2	4.07043e-184	1.07476e-179	0.259674	0.187	0.023		SLC6A6	2.03287e-24	5.36759e-20	0.17271	0.129	0.033		ABCC4	1.27648e-69	3.37042e-65	-0.319108	0.016	0.193		ARHGAP26	4.08218e-28	1.07786e-23	-0.313246	0.044	0.238		ADAMTS3	3.41518e-25	9.01743e-21	-0.47194	0.248	0.549
	LRRK2	3.90239e-213	1.03039e-208	0.780031	0.608	0.263		NRG3	2.34755e-28	6.19848e-24	0.659591	0.724	0.521		RNF213	2.28592e-183	6.03573e-179	0.474252	0.406	0.153		RHOBTB3	2.19534e-24	5.79656e-20	-0.393592	0.334	0.495		ADAMTS17	1.31761e-69	3.47902e-65	0.862331	0.548	0.188		FYB2	7.65323e-28	2.02076e-23	-0.711032	0.428	0.721		DUSP1	5.34095e-25	1.41022e-20	0.519089	0.452	0.145
	PPP1R16B	4.31641e-213	1.13971e-208	-0.646358	0.125	0.494		SLC34A1	3.07128e-28	8.10941e-24	-0.474696	0.013	0.196		PLCB1	4.38181e-182	1.15697e-177	0.680098	0.954	0.957		COL4A3	2.87069e-24	7.57976e-20	-0.3606	0.504	0.656		SDK1	4.52349e-69	1.19438e-64	-0.47664	0.037	0.247		OSMR-AS1	1.2389e-27	3.2712e-23	-0.40343	0.099	0.35		PDE4B	6.01606e-25	1.58848e-20	-0.374211	0.015	0.145
	HECW1	8.13438e-212	2.1478e-207	-0.608012	0.215	0.601		TNFAIP8	5.50005e-28	1.45223e-23	0.335752	0.333	0.14		CGNL1	4.72334e-182	1.24715e-177	-0.667972	0.583	0.819		ENOX1	4.33862e-24	1.14557e-19	-0.414426	0.225	0.398		ARHGEF38	3.4104e-68	9.00483e-64	-0.584104	0.235	0.552		CACNA1D	1.51138e-27	3.99065e-23	-0.580659	0.141	0.421		CFAP221	1.13739e-24	3.00315e-20	-0.479649	0.267	0.54
	BICC1	8.82964e-212	2.33138e-207	1.04228	0.915	0.78		ADAMTS1	1.54905e-27	4.09011e-23	0.252318	0.179	0.046		MET	1.30832e-181	3.45449e-177	0.485358	0.401	0.15		ZEB1	5.8421e-24	1.54255e-19	0.213337	0.237	0.102		SPP1	3.83422e-68	1.01239e-63	-1.09784	0.328	0.627		BIRC3	1.82558e-27	4.82025e-23	-0.250539	0.014	0.146		LTF	1.98133e-24	5.2315e-20	-0.279229	0.009	0.125
	PRLR	1.39446e-211	3.68194e-207	-0.677171	0.207	0.58		FHIT	2.71589e-27	7.17105e-23	-0.468826	0.891	0.93		ABCC4	2.1468e-180	5.66842e-176	0.328022	0.256	0.056		ST5	7.06787e-24	1.8662e-19	0.318517	0.381	0.221		SORCS3	5.41624e-68	1.4301e-63	-0.292152	0.006	0.156		GDA	2.04471e-27	5.39885e-23	-0.211919	0.009	0.125		PTPRG	3.15268e-24	8.32435e-20	-0.562753	0.374	0.662
	HAVCR1	2.0797e-211	5.49124e-207	0.502093	0.345	0.054		MSRA	3.11065e-27	8.21337e-23	-0.519865	0.285	0.507		NEAT1	2.99336e-177	7.90366e-173	0.710053	0.949	0.868		SYNE1	8.35667e-24	2.2065e-19	0.372287	0.723	0.607		GLIS3	2.08851e-67	5.5145e-63	-0.756974	0.536	0.801		RIPOR3	3.2935e-27	8.69617e-23	-0.282116	0.02	0.167		GABRB3	5.74849e-24	1.51783e-19	-0.304851	0.038	0.202
	MGAM	6.88123e-210	1.81692e-205	-0.665683	0.079	0.427		ANXA3	3.88559e-27	1.02595e-22	0.230246	0.21	0.064		GGT2	5.75944e-177	1.52072e-172	0.442285	0.295	0.083		HNF1A-AS1	9.00857e-24	2.37862e-19	-0.291121	0.301	0.471		TANC2	2.24904e-67	5.93838e-63	-0.526028	0.176	0.481		CSMD2	4.19976e-27	1.10891e-22	-0.23597	0.008	0.121		NCMAP	9.90503e-24	2.61533e-19	-0.17713	0.008	0.119
	KALRN	9.86949e-210	2.60594e-205	0.440083	0.299	0.032		PLSCR1	5.39326e-27	1.42404e-22	0.310101	0.343	0.151		PAX8-AS1	8.33105e-177	2.19973e-172	0.446734	0.479	0.213		RETREG1	1.15872e-23	3.05948e-19	0.309002	0.292	0.147		ICA1	4.22451e-67	1.11544e-62	0.646392	0.706	0.401		SMARCD3	6.37859e-27	1.6842e-22	-0.373567	0.083	0.317		PTBP3	1.3043e-23	3.44389e-19	-0.72171	0.569	0.783
	TTLL7	2.33738e-209	6.17161e-205	0.448269	0.309	0.036		HECW1	6.91067e-27	1.82469e-22	-0.350707	0.059	0.262		SGIP1	1.10232e-176	2.91056e-172	-0.536638	0.414	0.703		PKP4	1.67418e-23	4.42049e-19	-0.371768	0.741	0.822		AC012593.1	6.37314e-67	1.68276e-62	-0.272527	0.015	0.186		FAM20A	7.56504e-27	1.99747e-22	-0.407694	0.06	0.267		FGF12	1.32346e-23	3.49445e-19	0.681972	0.29	0.03
	AC016383.2	5.98266e-207	1.57966e-202	0.803184	0.304	0.037		LRRFIP1	6.97373e-27	1.84134e-22	0.368896	0.498	0.277		LINC01320	2.29898e-176	6.07022e-172	0.719191	0.803	0.661		WDR72	2.22368e-23	5.87139e-19	-0.297005	0.406	0.582		ATP6V0D2	3.87352e-66	1.02276e-61	0.58344	0.385	0.047		LIPG	1.18024e-26	3.1163e-22	-0.255896	0.021	0.167		ROS1	2.12245e-23	5.60412e-19	-0.29773	0.07	0.267
	AFMID	2.2087e-205	5.83186e-201	-0.588618	0.128	0.488		RTN4	7.37807e-27	1.94811e-22	0.391501	0.46	0.246		PLCH1	3.55419e-175	9.38449e-171	0.337616	0.29	0.077		SNX10	2.61782e-23	6.9121e-19	0.262336	0.342	0.188		CREB5	5.8615e-66	1.54767e-61	-0.317516	0.012	0.174		ITGB3	3.43665e-26	9.07412e-22	-0.155365	0.004	0.1		ZFP36	2.72269e-23	7.189e-19	0.505852	0.345	0.071
	FNDC3B	4.9356e-203	1.3032e-198	0.706758	0.692	0.369		PTH1R	1.12722e-26	2.97631e-22	-0.448892	0.113	0.33		RALYL	4.55422e-173	1.2025e-168	-0.583239	0.175	0.474		AC083837.1	2.86165e-23	7.55589e-19	0.379699	0.532	0.364		CACNB4	9.18025e-65	2.42395e-60	0.672159	0.794	0.467		OLFM4	4.97734e-26	1.31422e-21	-0.20132	0.004	0.096		VMP1	5.68012e-23	1.49978e-18	-0.460543	0.223	0.481
	ITGB3	1.92747e-202	5.0893e-198	0.395482	0.244	0.012		SLC36A2	1.16457e-26	3.07492e-22	-0.474965	0.08	0.285		CLIC4	1.63868e-172	4.32678e-168	0.35011	0.21	0.037		PPFIA2	7.65622e-23	2.02155e-18	-0.333206	0.133	0.279		PDE1A	1.46972e-64	3.88065e-60	-0.553243	0.051	0.271		SOX5	6.1946e-26	1.63562e-21	0.844713	0.781	0.529		PPP2R2B	7.24493e-23	1.91295e-18	-0.529915	0.078	0.276
	GLYAT	8.44787e-202	2.23058e-197	-0.610579	0.473	0.787		GPHN	1.37731e-26	3.63665e-22	-0.569452	0.685	0.818		BICD1	1.26472e-170	3.33937e-166	0.413929	0.351	0.119		FP236383.3	7.8546e-23	2.07393e-18	0.499288	0.74	0.617		LINC01205	1.72459e-64	4.55361e-60	0.591115	0.382	0.046		PLEKHG1	8.43684e-26	2.22766e-21	-0.237974	0.038	0.212		CLU	7.41936e-23	1.95901e-18	-0.249758	0.049	0.223
	PRODH2	7.14305e-200	1.88605e-195	-0.596841	0.075	0.411		RHEX	1.94023e-26	5.12299e-22	0.386707	0.909	0.774		ITGB8	2.77236e-169	7.32015e-165	0.617221	0.525	0.27		MIR4435-2HG	1.94748e-22	5.14214e-18	0.314903	0.428	0.269		FAM155A	1.91509e-64	5.05661e-60	-0.855953	0.345	0.688		NPDC1	1.14399e-25	3.02058e-21	-0.128339	0.003	0.088		ROBO2	7.49157e-23	1.97807e-18	-0.959274	0.194	0.445
	PCDH15	1.9899e-198	5.25413e-194	-0.661149	0.032	0.344		SLC35F3	3.21818e-26	8.49727e-22	0.381513	0.343	0.151		RANBP3L	2.84415e-169	7.50969e-165	-0.500115	0.296	0.601		LINC01606	2.16951e-22	5.72838e-18	-0.381282	0.455	0.602		PIK3C2G	4.93436e-64	1.30287e-59	0.664718	0.721	0.354		CALB1	2.47536e-25	6.53594e-21	0.703235	0.444	0.079		SLC14A2	7.81376e-23	2.06314e-18	-0.303117	0.049	0.223
	HAO2	5.80223e-198	1.53202e-193	-0.495308	0.047	0.369		PDZD2	4.50599e-26	1.18976e-21	-0.502391	0.046	0.235		GLS	2.30415e-168	6.08389e-164	0.607976	0.552	0.295		RHEX	2.28348e-22	6.02931e-18	0.297317	0.142	0.043		OPHN1	1.41642e-62	3.73992e-58	0.656199	0.653	0.33		ARL4C	2.70819e-25	7.15071e-21	-0.160556	0.01	0.121		GALNTL6	8.26514e-23	2.18233e-18	-0.566489	0.014	0.134
	FGF13	1.98845e-197	5.25031e-193	0.650953	0.323	0.049		EPHX2	6.00025e-26	1.58431e-21	-0.304237	0.07	0.271		SYNE1	4.37828e-166	1.15604e-161	0.610423	0.652	0.417		SEMA3C	2.78526e-22	7.35421e-18	0.278705	0.239	0.11		PAPPA2	1.54474e-62	4.07873e-58	-0.714368	0.084	0.329		HS3ST1	4.21115e-25	1.11191e-20	-0.211006	0.011	0.125		ABCC3	8.85581e-23	2.33829e-18	-0.260125	0.031	0.181
	AKT3	4.0254e-195	1.06287e-190	0.61368	0.468	0.146		LAMC1	6.56079e-26	1.73231e-21	0.404418	0.463	0.264		CXCL12	8.57446e-165	2.264e-160	-0.356407	0.025	0.257		KIFC3	1.17617e-21	3.10557e-17	0.320962	0.443	0.292		FMNL2	1.65494e-62	4.3697e-58	-0.475898	0.152	0.439		SYTL2	4.37724e-25	1.15577e-20	-0.702288	0.35	0.65		FGD6	9.58166e-23	2.52994e-18	-0.297334	0.075	0.27
	PDE4D	3.30285e-194	8.72086e-190	0.660396	0.984	0.986		KIRREL1	7.16947e-26	1.89303e-21	0.258965	0.251	0.09		CLCNKA	4.93765e-164	1.30374e-159	-0.401795	0.071	0.328		OSMR	1.75159e-21	4.6249e-17	0.262232	0.455	0.288		GFPT2	1.49297e-60	3.94204e-56	-0.309145	0.026	0.202		TNFRSF11B	4.76855e-25	1.25909e-20	-0.226326	0.011	0.125		RSRP1	1.01424e-22	2.678e-18	-0.32745	0.174	0.433
	MET	2.4542e-192	6.48008e-188	0.619276	0.457	0.143		MITF	7.77544e-26	2.05303e-21	0.488776	0.586	0.382		NFKBIZ	1.27694e-163	3.37163e-159	0.345334	0.224	0.047		NOS1	1.87668e-21	4.95518e-17	-0.299228	0.108	0.246		FRMD3	2.03175e-60	5.36463e-56	0.770538	0.552	0.229		RHCG	4.80259e-25	1.26808e-20	0.593387	0.346	0.013		SLC8A1-AS1	1.57946e-22	4.1704e-18	-0.286244	0.043	0.208
	ATP8B4	2.11868e-191	5.59415e-187	-0.643114	0.133	0.475		PARD3	9.2751e-26	2.449e-21	0.429573	0.954	0.927		ASIC2	1.39078e-163	3.67222e-159	0.366504	0.191	0.031		ITGA3	2.08784e-21	5.51273e-17	0.280507	0.343	0.198		KAZN	2.04549e-60	5.40091e-56	-0.996622	0.487	0.728		P2RY6	5.17186e-25	1.36558e-20	-0.227348	0.017	0.146		NHS	2.33165e-22	6.1565e-18	-0.278773	0.035	0.187
	RNF212B	1.09791e-190	2.89892e-186	-1.15351	0.048	0.359		LINC02532	2.00075e-25	5.28277e-21	-0.39755	0.533	0.739		SLC16A7	4.50539e-163	1.1896e-158	-0.480448	0.201	0.485		ZNF608	2.67045e-21	7.05105e-17	0.26407	0.378	0.226		CFI	1.12755e-59	2.97718e-55	-0.345196	0.082	0.32		TBC1D9	6.59526e-25	1.74141e-20	-0.563883	0.332	0.633		CFTR	2.42192e-22	6.39484e-18	-0.242114	0.006	0.107
	GLIS3	1.92876e-190	5.09269e-186	0.811417	0.787	0.536		MAMLD1	2.10815e-25	5.56635e-21	0.224795	0.176	0.048		SASH1	3.2783e-162	8.65602e-158	0.562758	0.542	0.293		LINC00511	4.33845e-21	1.14552e-16	0.288398	0.294	0.153		PLPPR1	1.81669e-59	4.79679e-55	0.633855	0.458	0.128		CREB5	1.08304e-24	2.85967e-20	-0.260026	0.013	0.133		PDZK1	2.88222e-22	7.61021e-18	-0.274312	0.068	0.255
	SLC12A6	2.21042e-190	5.8364e-186	-0.576577	0.256	0.61		TNS1	2.79118e-25	7.36983e-21	-0.392746	0.191	0.417		AC068631.1	3.27089e-159	8.63645e-155	-0.423719	0.104	0.366		WSB1	5.21521e-21	1.37702e-16	-0.300216	0.62	0.738		TMEM52B	2.14488e-59	5.66335e-55	0.562087	0.809	0.501		MIR4435-2HG	1.352e-24	3.56983e-20	-0.52624	0.161	0.429		SGIP1	4.01498e-22	1.06012e-17	-0.224791	0.016	0.139
	LINC02499	5.89203e-190	1.55573e-185	-0.562331	0.03	0.331		SLC4A4	3.21902e-25	8.4995e-21	-0.62273	0.323	0.536		AC110296.1	3.94286e-158	1.04107e-153	0.391023	0.422	0.172		LINC01182	5.7154e-21	1.50909e-16	-0.338193	0.187	0.337		ATP1B1	2.24238e-59	5.92077e-55	0.579475	0.914	0.682		LAMC2	1.52981e-24	4.0393e-20	-0.119162	0.004	0.092		BTG2	4.21111e-22	1.1119e-17	0.522776	0.471	0.19
	NQO2	1.4433e-188	3.81089e-184	-0.541019	0.157	0.508		MAF	3.40037e-25	8.97833e-21	-0.342665	0.059	0.25		SYT16	1.07858e-156	2.84788e-152	0.252925	0.181	0.028		BBOX1-AS1	6.1752e-21	1.6305e-16	-0.290261	0.109	0.242		CDH3	2.508e-59	6.62213e-55	-0.289969	0.038	0.229		CFAP54	1.70344e-24	4.49776e-20	-0.184853	0.015	0.138		TRPV5	6.96827e-22	1.8399e-17	-0.256813	0.015	0.134
	AC003044.1	4.95952e-187	1.30951e-182	-0.82517	0.42	0.749		RNF152	5.10035e-25	1.3467e-20	-0.473356	0.1	0.302		SLC35F5	3.56358e-154	9.40927e-150	0.479053	0.52	0.277		KCNJ1	1.22661e-20	3.23873e-16	-0.241841	0.145	0.288		IL1RAPL2	2.7282e-59	7.20353e-55	0.940209	0.359	0.047		ABCC3	2.65067e-24	6.99883e-20	-0.197374	0.017	0.146		ARHGAP29	1.30145e-21	3.43634e-17	-0.569664	0.48	0.709
	SLC28A1	7.94048e-187	2.0966e-182	-0.614319	0.446	0.764		CDH9	1.10349e-24	2.91365e-20	-0.571588	0.202	0.412		ANK2	2.65089e-153	6.99941e-149	-0.543641	0.334	0.601		NAALADL2	1.71937e-20	4.53982e-16	-0.290258	0.798	0.866		HS6ST2	3.91259e-59	1.03308e-54	0.640916	0.5	0.157		TSPAN1	3.00359e-24	7.93069e-20	-0.191326	0.02	0.154		GRM8	1.32549e-21	3.49983e-17	-0.218808	0.012	0.125
	PRKD1	7.47529e-185	1.97378e-180	0.666667	0.535	0.216		LAMC2	1.15143e-24	3.04023e-20	0.15757	0.119	0.022		ALDH1L1	3.24385e-152	8.56506e-148	-0.404456	0.076	0.321		GGT2	1.86559e-20	4.92589e-16	0.313878	0.387	0.238		ESRRB	5.48757e-59	1.44894e-54	0.58989	0.556	0.221		TGM2	3.17213e-24	8.37568e-20	-0.116405	0.003	0.083		LRRC4C	1.35358e-21	3.57399e-17	-0.242129	0.028	0.166
	KCNT2	1.16628e-184	3.07945e-180	0.500956	0.262	0.027		PTPRO	1.62374e-24	4.28732e-20	0.32809	0.196	0.06		MTHFD1L	4.27482e-152	1.12872e-147	0.312472	0.248	0.063		IPCEF1	2.40503e-20	6.35023e-16	-0.284894	0.293	0.454		TMTC1	6.05477e-59	1.5987e-54	0.812289	0.35	0.04		CCL2	3.42211e-24	9.03575e-20	-0.124686	0.001	0.075		NRSN1	1.38459e-21	3.65586e-17	-0.182158	0.011	0.122
	ACO1	1.34921e-183	3.56245e-179	-0.554762	0.159	0.497		ENPEP	1.72499e-24	4.55466e-20	-0.545638	0.352	0.548		ERBB4	7.40175e-151	1.95436e-146	0.669599	0.97	0.956		AC005208.1	2.63374e-20	6.95414e-16	-0.284354	0.35	0.505		LINC01055	1.2668e-58	3.34486e-54	0.582083	0.474	0.135		FYB1	4.99066e-24	1.31773e-19	-0.178954	0.01	0.117		FMN1	1.4206e-21	3.75095e-17	-0.264031	0.037	0.19
	RAP1GAP2	4.23814e-182	1.11904e-177	0.352265	0.224	0.011		MICAL3	2.81629e-24	7.43613e-20	0.459052	0.615	0.419		SAMD4A	3.40083e-150	8.97956e-146	0.558392	0.46	0.216		KALRN	3.39649e-20	8.9681e-16	0.194311	0.209	0.091		TMPRSS4	2.03625e-58	5.37652e-54	-0.248538	0.01	0.152		AL136441.1	5.3352e-24	1.40871e-19	-0.167699	0.008	0.108		CFI	2.92368e-21	7.7197e-17	-0.259575	0.07	0.255
	LINC02471	1.04723e-181	2.76512e-177	0.472954	0.305	0.049		PLPPR1	3.00906e-24	7.94511e-20	-0.520074	0.042	0.219		KLF6	6.49311e-150	1.71444e-145	0.434158	0.288	0.09		HAVCR1	3.62837e-20	9.58035e-16	0.128838	0.094	0.02		ZNF608	6.7503e-58	1.78235e-53	-0.466198	0.121	0.377		IFNAR2	6.23649e-24	1.64668e-19	-0.337291	0.078	0.292		SLC9C1	4.96047e-21	1.30976e-16	-0.351554	0.143	0.371
	MYO3A	1.07166e-180	2.82962e-176	0.386168	0.239	0.018		CLDN10	3.98792e-24	1.05297e-19	-0.476631	0.325	0.538		FAM155A	1.98936e-148	5.25272e-144	0.564187	0.25	0.066		ESRRG	4.88098e-20	1.28877e-15	-0.304273	0.939	0.961		COL7A1	1.71623e-57	4.53153e-53	-0.220643	0.004	0.126		COL4A4	6.40669e-24	1.69162e-19	-0.506804	0.264	0.562		TSPAN1	1.3251e-20	3.4988e-16	-0.25005	0.068	0.246
	AC016822.1	2.91953e-179	7.70872e-175	-0.622735	0.06	0.366		TMEM246-AS1	4.02387e-24	1.06246e-19	-0.351253	0.028	0.197		MFSD4A	3.42212e-148	9.03578e-144	-0.43206	0.124	0.377		CASR	7.46386e-20	1.97076e-15	-0.300905	0.735	0.843		PTPRM	1.80637e-57	4.76953e-53	-0.537772	0.277	0.58		UGT2B7	6.63963e-24	1.75313e-19	-0.418834	0.06	0.25		CACNA1D	2.4197e-20	6.38899e-16	-0.193211	0.023	0.151
	SLC5A10	6.22423e-179	1.64345e-174	-0.581348	0.136	0.466		RORA	6.45135e-24	1.70341e-19	-0.444729	0.741	0.863		PTH2R	1.51862e-147	4.00976e-143	-0.505855	0.769	0.903		CP	9.91963e-20	2.61918e-15	0.180624	0.104	0.027		RHOBTB3	4.32507e-57	1.14199e-52	0.660766	0.689	0.409		FGD6	8.10554e-24	2.14019e-19	-0.281752	0.058	0.25		RIPOR3	3.07801e-20	8.12718e-16	-0.275464	0.03	0.166
	GPX3	1.06018e-178	2.79931e-174	-0.561345	0.188	0.536		GLIS1	7.07302e-24	1.86756e-19	-0.369753	0.276	0.494		FKBP5	5.98173e-147	1.57942e-142	-1.06494	0.288	0.515		MET	1.41248e-19	3.72951e-15	0.350032	0.485	0.348		DACH1	1.96217e-56	5.1809e-52	-0.720276	0.823	0.931		HUNK	8.34074e-24	2.20229e-19	-0.473077	0.141	0.4		LDLRAD4	3.23928e-20	8.55298e-16	-0.37706	0.129	0.347
	MAST4	1.41835e-178	3.745e-174	-0.612855	0.745	0.907		MYO1E	8.11684e-24	2.14317e-19	0.360941	0.405	0.213		ATP11A	1.15744e-146	3.05611e-142	0.431355	0.44	0.204		NRG1	1.55343e-19	4.10167e-15	0.292613	0.208	0.095		IFNAR2	1.21317e-55	3.20326e-51	-0.256751	0.033	0.211		CFI	9.27929e-24	2.4501e-19	-0.354975	0.09	0.312		AC131944.1	3.48975e-20	9.21435e-16	-0.206925	0.005	0.095
	SORCS1	4.05656e-178	1.0711e-173	-1.0574	0.106	0.418		PTH2R	8.38737e-24	2.2146e-19	-0.383915	0.925	0.971		CPEB2	1.42867e-146	3.77225e-142	0.543728	0.623	0.388		ACSL4	2.40987e-19	6.36301e-15	-0.389588	0.363	0.505		MALAT1	1.40528e-55	3.71049e-51	0.371335	1	1		SNX10	1.04611e-23	2.76216e-19	-0.459065	0.138	0.392		AC119673.2	3.66286e-20	9.6714e-16	-0.274368	0.095	0.294
	PARD3	7.25947e-178	1.91679e-173	0.680398	0.934	0.864		SUGCT	2.01433e-23	5.31863e-19	-0.431725	0.432	0.631		DEPTOR	4.05842e-146	1.07159e-141	0.648347	0.679	0.474		RAPGEF5	4.61996e-19	1.21985e-14	0.189888	0.211	0.096		FHIT	1.5746e-55	4.15759e-51	0.525532	0.973	0.901		SDK1	1.10955e-23	2.92965e-19	-0.703828	0.388	0.692		AC079768.4	3.96554e-20	1.04706e-15	-0.131176	0.005	0.095
	AC026803.3	4.3205e-177	1.14078e-172	-0.458521	0.088	0.408		ACMSD	2.62364e-23	6.92745e-19	-0.368792	0.192	0.401		F11	6.23108e-145	1.64525e-140	-0.309995	0.033	0.249		CA10	5.65844e-19	1.49405e-14	-0.314731	0.21	0.352		ARHGEF3	1.71623e-54	4.53154e-50	-0.642206	0.575	0.802		TGFB2	1.61295e-23	4.25884e-19	-0.151828	0.004	0.092		IDI1	4.03033e-20	1.06417e-15	0.586685	0.241	0.018
	PLEKHH2	7.60376e-176	2.0077e-171	0.390768	0.23	0.016		SLC28A1	3.67503e-23	9.70355e-19	-0.388868	0.289	0.494		RHOBTB3	8.42665e-145	2.22497e-140	-0.57001	0.433	0.67		ARHGAP6	8.89159e-19	2.34774e-14	0.352596	0.812	0.741		UNC5C	3.00076e-54	7.9232e-50	0.752538	0.528	0.204		NHS	1.62974e-23	4.30315e-19	-0.545988	0.214	0.5		PHLDB1	4.9268e-20	1.30087e-15	-0.222956	0.065	0.24
	AC098829.1	1.08075e-175	2.8536e-171	-1.04906	0.096	0.406		ETS1	4.2179e-23	1.1137e-18	0.244425	0.204	0.069		SSH2	1.72111e-143	4.54442e-139	0.459885	0.51	0.269		AC104035.1	9.13771e-19	2.41272e-14	0.189769	0.148	0.055		AL096799.1	3.63012e-54	9.58496e-50	-0.209686	0.001	0.108		FUT8	2.05495e-23	5.4259e-19	-0.289781	0.073	0.283		ATP11A	4.98362e-20	1.31587e-15	-0.282773	0.062	0.231
	SGK2	1.20604e-175	3.18443e-171	-0.477586	0.067	0.373		PLOD2	5.24052e-23	1.38371e-18	0.330929	0.312	0.139		TPM1	2.9961e-143	7.91091e-139	0.370403	0.288	0.094		ABI3BP	1.06284e-18	2.80633e-14	0.207777	0.201	0.09		DEPTOR	2.46413e-53	6.50629e-49	-0.656785	0.318	0.584		COL27A1	2.52313e-23	6.66208e-19	-0.291037	0.048	0.225		HABP2	6.96961e-20	1.84025e-15	-0.103241	0	0.071
	MACC1	1.92136e-175	5.07317e-171	0.703682	0.504	0.192		LINC01020	5.96243e-23	1.57432e-18	-0.363422	0.016	0.171		PON2	6.94584e-143	1.83398e-138	0.346199	0.419	0.184		RIPOR3	1.22731e-18	3.2406e-14	0.206928	0.197	0.088		CDK14	2.60264e-53	6.87201e-49	0.623291	0.771	0.548		SLC14A2	3.12822e-23	8.25974e-19	-0.949817	0.06	0.246		SQLE	1.11078e-19	2.93291e-15	0.500273	0.25	0.027
	F11-AS1	5.54126e-174	1.46312e-169	-0.552783	0.03	0.314		BICD1	6.92616e-23	1.82878e-18	0.36213	0.458	0.256		PKHD1	2.63086e-142	6.94651e-138	0.444826	0.977	0.967		DENND2A	2.09173e-18	5.523e-14	0.318907	0.485	0.345		PKP4	2.79781e-53	7.38734e-49	0.610193	0.855	0.673		PTPRG	4.19248e-23	1.10698e-18	-0.708351	0.509	0.771		PIM3	1.18344e-19	3.12474e-15	0.49819	0.405	0.148
	LINC00621	1.15605e-172	3.05244e-168	0.7423	0.352	0.082		NAV3	9.77385e-23	2.58069e-18	0.165268	0.098	0.015		TMEM72	6.56246e-142	1.73275e-137	-0.382678	0.215	0.48		CLDN1	2.14969e-18	5.67603e-14	0.140292	0.086	0.019		TACC1	4.85614e-53	1.28221e-48	0.59364	0.557	0.244		VMP1	1.49845e-22	3.95651e-18	-0.43339	0.191	0.467		COL4A4	1.35233e-19	3.57069e-15	-0.239268	0.044	0.196
	PRICKLE1	3.78593e-171	9.99637e-167	0.703774	0.372	0.099		PFKP	1.05886e-22	2.79582e-18	0.23755	0.253	0.099		CLCN5	4.90275e-141	1.29452e-136	-0.454293	0.562	0.799		EFHD1	3.68311e-18	9.72488e-14	-0.24016	0.266	0.416		MGLL	4.97757e-53	1.31428e-48	-0.293797	0.047	0.238		LDLRAD4	1.96774e-22	5.19563e-18	-0.223473	0.025	0.162		TENM4	1.43977e-19	3.80156e-15	-0.206783	0.012	0.116
	BBOX1	4.39247e-171	1.15979e-166	-0.642754	0.253	0.587		DPYS	1.14496e-22	3.02315e-18	-0.406427	0.287	0.488		DNASE1	3.98272e-140	1.0516e-135	-0.387102	0.163	0.418		FAM184A	3.80384e-18	1.00436e-13	-0.207747	0.176	0.318		CBLB	7.17217e-53	1.89374e-48	0.608368	0.697	0.432		GPC5	1.96781e-22	5.19581e-18	1.17289	0.493	0.167		PTCSC3	1.53018e-19	4.04029e-15	0.443196	0.33	0.083
	CYP4A22-AS1	5.20505e-171	1.37434e-166	-0.611731	0.059	0.353		ADAM10	1.39582e-22	3.68552e-18	0.38246	0.478	0.284		SAT1	2.28773e-139	6.04052e-135	0.605614	0.486	0.263		MYLK	3.88918e-18	1.0269e-13	0.293171	0.321	0.192		NRSN1	7.79869e-53	2.05917e-48	-0.207735	0.01	0.141		UNC5CL	4.72728e-22	1.24819e-17	-0.137275	0.01	0.112		GABRA2	1.5643e-19	4.13038e-15	-0.348711	0.142	0.359
	ACMSD	1.38515e-170	3.65734e-166	-0.562961	0.353	0.68		PDZRN3	1.53554e-22	4.05445e-18	-0.365546	0.163	0.375		WNK4	8.63061e-139	2.27883e-134	-0.34942	0.095	0.337		EFCAB13	5.17313e-18	1.36591e-13	0.320476	0.38	0.248		PRICKLE1	1.49661e-52	3.95166e-48	-0.302796	0.005	0.123		AC104035.1	7.15593e-22	1.88945e-17	-0.256121	0.029	0.171		CADM1	1.94647e-19	5.13947e-15	-0.33527	0.102	0.297
	SLC36A2	1.47022e-169	3.88196e-165	-0.772934	0.237	0.566		PXDN	1.92276e-22	5.07686e-18	0.236802	0.24	0.091		TNFRSF11B	1.96119e-135	5.17832e-131	0.226701	0.159	0.025		STOX2	6.23312e-18	1.64579e-13	0.270052	0.589	0.44		COL18A1	3.46872e-52	9.1588e-48	-0.417469	0.192	0.464		HIF1A	7.86021e-22	2.07541e-17	-0.796753	0.271	0.521		AC068234.2	2.02006e-19	5.33377e-15	-0.14955	0.012	0.116
	DOCK11	1.18222e-168	3.12153e-164	0.493069	0.312	0.061		SLCO3A1	2.22897e-22	5.88538e-18	0.416208	0.393	0.211		PTPRK	3.86327e-135	1.02006e-130	0.468836	0.642	0.419		IL4R	7.22489e-18	1.90766e-13	0.131657	0.134	0.047		CCSER1	1.99872e-51	5.27742e-47	0.474401	0.99	0.949		NDRG1	8.024e-22	2.11866e-17	0.862429	0.51	0.196		TCIM	2.38256e-19	6.2909e-15	-0.157062	0.01	0.11
	OXR1	1.26678e-168	3.3448e-164	0.778613	0.855	0.707		ABTB2	2.30966e-22	6.09843e-18	0.541283	0.312	0.15		RAPGEF5	6.56889e-135	1.73445e-130	0.207847	0.141	0.018		PCSK6	8.55776e-18	2.25959e-13	0.198033	0.185	0.082		PLEKHG1	5.78522e-51	1.52753e-46	-0.249276	0.024	0.177		LSAMP	9.75826e-22	2.57657e-17	1.34414	0.403	0.092		AC022424.1	2.48662e-19	6.56567e-15	-0.237746	0.044	0.193
	DTNA	1.4562e-168	3.84494e-164	0.550081	0.412	0.124		HNF4A	2.32737e-22	6.14519e-18	-0.28629	0.07	0.253		AC012593.1	5.58988e-134	1.47595e-129	0.435266	0.448	0.222		INPP4B	1.06423e-17	2.80999e-13	-0.257127	0.269	0.418		LINC01482	2.95551e-50	7.80373e-46	-0.456175	0.144	0.395		LRP1B	1.09898e-21	2.90174e-17	-0.727898	0.544	0.804		AC004594.1	2.60967e-19	6.89058e-15	-0.590149	0.338	0.57
	AC113414.1	2.56202e-168	6.76475e-164	-0.599407	0.162	0.487		SOGA3	2.411e-22	6.366e-18	0.161229	0.148	0.039		AC138305.1	6.66118e-134	1.75882e-129	-0.637914	0.351	0.587		CA4	1.55278e-17	4.09997e-13	-0.152465	0.04	0.134		DCDC1	3.34406e-50	8.82967e-46	-0.321897	0.091	0.315		SGIP1	1.45584e-21	3.844e-17	-0.244191	0.026	0.162		TBC1D9	2.63742e-19	6.96384e-15	-0.510652	0.277	0.504
	PRKAG2	5.91027e-167	1.56055e-162	-0.541982	0.185	0.512		KIF26B	2.58982e-22	6.83815e-18	0.390553	0.494	0.286		ARHGEF3	3.32238e-133	8.7724e-129	0.539869	0.538	0.313		PLCXD2	1.56671e-17	4.13674e-13	-0.270736	0.341	0.492		KIF26B	4.78963e-50	1.26465e-45	-0.350358	0.039	0.21		APCDD1L-DT	1.49653e-21	3.95145e-17	0.540972	0.454	0.129		EFNA5	2.80773e-19	7.41352e-15	-0.495234	0.424	0.682
	AC083837.1	1.1392e-166	3.00794e-162	0.638147	0.406	0.122		SNX29	5.66135e-22	1.49482e-17	-0.425972	0.644	0.783		CA12	4.35019e-133	1.14862e-128	-0.446145	0.419	0.696		ALDH1A2	1.70114e-17	4.49169e-13	0.311335	0.423	0.285		SLC5A3	4.89331e-50	1.29203e-45	0.520812	0.494	0.188		TFCP2L1	4.83418e-21	1.27642e-16	0.574224	0.68	0.367		ARSB	3.12207e-19	8.24353e-15	-0.302121	0.06	0.223
	SLCO3A1	7.91266e-166	2.08926e-161	0.436653	0.254	0.031		KIAA0408	8.75943e-22	2.31284e-17	0.169338	0.139	0.035		MROH7	5.65739e-133	1.49378e-128	-0.367282	0.107	0.341		ITM2C	2.2906e-17	6.04809e-13	-0.181295	0.08	0.191		ITGB3	6.05365e-50	1.59841e-45	-0.171797	0.002	0.104		AL078604.4	6.05064e-21	1.59761e-16	-0.36613	0.088	0.292		RNF144B	3.90061e-19	1.02992e-14	-0.331631	0.092	0.279
	AASS	3.66124e-165	9.66713e-161	-0.588112	0.12	0.427		MYO1B	1.14059e-21	3.0116e-17	0.232804	0.202	0.07		ACOT11	1.80552e-132	4.76729e-128	-0.364796	0.144	0.388		AOPEP	2.3678e-17	6.25194e-13	0.292428	0.766	0.66		ABCC3	1.19208e-49	3.14757e-45	-0.17983	0.008	0.126		ELF3	6.28546e-21	1.65961e-16	-0.289882	0.079	0.283		TGFBR1	4.02484e-19	1.06272e-14	-0.620637	0.168	0.38
	PAH	1.4129e-164	3.73063e-160	-0.662436	0.31	0.64		PRLR	1.30697e-21	3.45093e-17	-0.301948	0.072	0.248		PTPN14	1.6746e-131	4.42162e-127	0.51526	0.608	0.396		BCL2	2.703e-17	7.137e-13	0.348011	0.427	0.293		PDZRN3	2.21598e-49	5.85107e-45	0.528152	0.569	0.247		HDAC9	6.36626e-21	1.68095e-16	-0.167511	0.01	0.108		LINC00937	9.93791e-19	2.62401e-14	-0.20037	0.033	0.166
	KLF6	1.49155e-164	3.93829e-160	0.654023	0.433	0.149		CDHR3	1.86915e-21	4.93531e-17	-0.381139	0.315	0.512		PXDNL	4.94144e-131	1.30474e-126	-0.44276	0.076	0.295		CLDN16	3.89977e-17	1.0297e-12	-0.278869	0.19	0.321		ME3	2.37573e-49	6.27287e-45	0.551303	0.546	0.24		ARHGEF38	9.38256e-21	2.47737e-16	-0.413822	0.229	0.504		SLIT3	1.16139e-18	3.06654e-14	-0.209151	0.016	0.122
	SLC35F3	2.92971e-164	7.7356e-160	0.414853	0.196	0.007		BIRC3	2.55353e-21	6.74234e-17	0.326955	0.181	0.059		SLC5A3	3.67139e-130	9.69393e-126	-0.470571	0.321	0.557		RNF19A	4.98802e-17	1.31704e-12	0.298296	0.399	0.269		AGBL4	2.51519e-49	6.64111e-45	-0.672806	0.54	0.782		AC131944.1	9.99413e-21	2.63885e-16	-0.381259	0.019	0.138		AJAP1	2.06505e-18	5.45257e-14	-0.188358	0.015	0.119
	ITGB6	4.34679e-164	1.14773e-159	0.402927	0.203	0.01		GMDS	2.70557e-21	7.1438e-17	0.397088	0.589	0.408		ARHGAP29	4.30997e-130	1.138e-125	0.560752	0.609	0.396		LINC-PINT	5.00606e-17	1.3218e-12	0.302597	0.645	0.515		ADAMTSL3	2.85974e-49	7.55087e-45	-0.337945	0.05	0.233		PTPRD	1.23079e-20	3.24978e-16	-0.269684	0.031	0.171		NPAS3	2.17111e-18	5.73259e-14	-0.482435	0.369	0.623
	AC113386.1	4.92755e-163	1.30107e-158	0.458189	0.297	0.056		DCC	3.41661e-21	9.0212e-17	-0.686603	0.254	0.465		HIBADH	1.61152e-129	4.25506e-125	-0.45559	0.307	0.555		AC131944.1	5.42412e-17	1.43219e-12	0.300926	0.318	0.186		GPHN	3.96172e-49	1.04605e-44	0.535503	0.882	0.739		DNAH5	1.3607e-20	3.5928e-16	-0.150658	0.013	0.117		CADPS2	2.244e-18	5.92507e-14	-0.721706	0.863	0.926
	BICD1	1.03387e-161	2.72983e-157	0.487087	0.303	0.059		SLC17A1	3.71944e-21	9.82082e-17	-0.491938	0.564	0.715		EPHX2	3.12674e-129	8.25584e-125	-0.338592	0.095	0.321		ETV6	5.49101e-17	1.44985e-12	0.253072	0.509	0.365		SEMA6D	1.02991e-48	2.71938e-44	0.504026	0.435	0.14		NRSN1	1.42407e-20	3.76012e-16	-0.168951	0.019	0.138		RPLP1	3.03759e-18	8.02045e-14	-0.278768	0.066	0.228
	PCSK5	1.50348e-161	3.96979e-157	-0.614842	0.332	0.645		NAMPT	4.0614e-21	1.07237e-16	0.323889	0.217	0.081		CFI	6.00085e-128	1.58446e-123	0.316793	0.345	0.138		AC011586.2	5.59768e-17	1.47801e-12	-0.292058	0.294	0.438		NPAS3	2.23736e-48	5.90752e-44	-0.455151	0.157	0.413		EPB41L3	1.45208e-20	3.83407e-16	0.6406	0.468	0.162		MYO3B	3.10037e-18	8.18622e-14	-0.424845	0.508	0.727
	AC027288.3	2.39071e-160	6.31243e-156	-0.643378	0.244	0.57		ACTR3	4.45188e-21	1.17547e-16	0.248349	0.338	0.165		MALRD1	2.07154e-127	5.4697e-123	-0.407246	0.144	0.381		CRIM1	6.2993e-17	1.66327e-12	0.280404	0.401	0.268		ZNF486	4.42136e-48	1.16742e-43	-0.192918	0.01	0.131		UGCG	1.57913e-20	4.16954e-16	-0.411786	0.113	0.333		SVIL	4.34675e-18	1.14772e-13	-0.397453	0.18	0.398
	AC009060.1	3.08846e-160	8.15478e-156	-0.550037	0.188	0.508		CACNA2D3	5.45184e-21	1.4395e-16	0.284372	0.372	0.189		HS3ST1	2.61736e-126	6.91089e-122	0.206916	0.129	0.015		PICALM	7.51858e-17	1.98521e-12	0.328691	0.595	0.476		PTPRK	5.33566e-48	1.40883e-43	-0.534885	0.406	0.655		TOX3	2.15374e-20	5.68674e-16	0.678816	0.718	0.467		LINC01781	4.49805e-18	1.18767e-13	-0.236292	0.026	0.145
	FUT6	6.87176e-160	1.81442e-155	-0.470317	0.151	0.467		FMO1	5.51435e-21	1.45601e-16	-0.315539	0.109	0.297		TAPT1-AS1	3.46666e-126	9.15338e-122	-0.41434	0.302	0.548		C4orf19	1.00641e-16	2.65733e-12	0.268854	0.484	0.349		MIR31HG	6.16811e-48	1.62863e-43	-0.21557	0.006	0.117		LIPC	2.3938e-20	6.32059e-16	-0.274717	0.055	0.225		IER2	4.75046e-18	1.25431e-13	0.392625	0.298	0.068
	ARSB	8.01578e-160	2.11649e-155	-0.81263	0.285	0.593		RETREG1	6.14012e-21	1.62124e-16	0.373108	0.489	0.303		SGK2	6.40356e-126	1.6908e-121	-0.386237	0.249	0.496		HSD11B2	1.31499e-16	3.47209e-12	-0.152027	0.051	0.147		TRIM50	2.4842e-47	6.55928e-43	0.369651	0.264	0.015		SYNE2	2.67908e-20	7.07384e-16	-0.515681	0.471	0.75		METAP2	5.57318e-18	1.47154e-13	-0.388497	0.242	0.472
	MSC-AS1	1.38066e-159	3.64551e-155	0.482412	0.32	0.069		MIR31HG	6.19654e-21	1.63614e-16	0.264212	0.274	0.117		CMTM7	9.53566e-126	2.5178e-121	0.164093	0.113	0.009		SLC35F3	1.3811e-16	3.64666e-12	0.132679	0.075	0.016		CACNA2D3	7.15614e-47	1.88951e-42	0.513274	0.838	0.602		ZFP36L1	4.2721e-20	1.12801e-15	-0.417626	0.182	0.438		HRH1	5.57723e-18	1.47261e-13	-0.144042	0.004	0.083
	ALDH6A1	5.3095e-159	1.40192e-154	-0.441744	0.066	0.353		AC016383.2	7.33081e-21	1.93563e-16	-0.611535	0.157	0.349		BTBD11	1.40001e-124	3.69659e-120	-0.34065	0.069	0.281		ABCC3	1.60644e-16	4.24166e-12	0.197465	0.293	0.168		PDE5A	9.97165e-47	2.63292e-42	-0.437889	0.145	0.381		COLEC10	4.74859e-20	1.25382e-15	-0.184358	0.02	0.138		ARL4C	1.09135e-17	2.8816e-13	-0.108687	0.002	0.071
	SLC22A8	1.28822e-158	3.40142e-154	-0.50525	0.094	0.394		WDR72	8.3259e-21	2.19837e-16	-0.422138	0.542	0.704		PGM2L1	2.51509e-124	6.64085e-120	0.228914	0.186	0.042		RBFOX1	1.71273e-16	4.52229e-12	0.350683	0.43	0.289		FNDC3B	9.9978e-47	2.63982e-42	-0.631121	0.832	0.91		GFPT2	1.06631e-19	2.8155e-15	-0.245482	0.051	0.212		TRABD2B	1.12175e-17	2.96188e-13	-0.470393	0.254	0.484
	ITGA3	2.67907e-158	7.07383e-154	0.344786	0.197	0.01		AGFG1	8.79434e-21	2.32206e-16	0.307793	0.478	0.288		PPARA	2.67111e-124	7.05279e-120	-0.383784	0.175	0.414		PTPN14	1.88919e-16	4.98823e-12	0.307842	0.677	0.565		LINC00472	1.06877e-46	2.82199e-42	0.50554	0.975	0.921		GBP2	1.30272e-19	3.4397e-15	-0.163129	0.012	0.108		PLCH1	1.3202e-17	3.48586e-13	-0.287437	0.091	0.267
	DPYS	2.22294e-157	5.86944e-153	-0.562288	0.441	0.737		MAP4K4	1.03915e-20	2.74376e-16	0.323486	0.501	0.309		RNF152	5.17276e-124	1.36581e-119	-0.404274	0.101	0.323		TMEM52B	2.59951e-16	6.86374e-12	-0.176544	0.026	0.106		RALGAPA2	4.06255e-46	1.07268e-41	-0.442996	0.287	0.551		LINC01781	1.39275e-19	3.67741e-15	-0.188496	0.013	0.112		PER1	1.38504e-17	3.65706e-13	0.442354	0.315	0.086
	TMEM246-AS1	3.62132e-157	9.56172e-153	-0.545101	0.157	0.479		MYOF	1.16076e-20	3.06488e-16	0.220153	0.295	0.132		AC044810.2	7.09442e-124	1.87321e-119	0.271064	0.141	0.021		SOD3	2.88944e-16	7.62928e-12	-0.155209	0.011	0.079		FSTL4	5.45095e-46	1.43927e-41	0.491238	0.32	0.054		RHEX	2.05919e-19	5.43708e-15	-0.217766	0.013	0.112		PTH2R	1.39363e-17	3.67973e-13	0.534539	0.806	0.623
	ZFP36L1	3.44775e-156	9.10344e-152	0.447286	0.317	0.071		LPP	1.28527e-20	3.39363e-16	0.353309	0.907	0.861		ADAMTS17	2.66732e-123	7.04278e-119	-0.408202	0.105	0.327		TBC1D1	3.08277e-16	8.13974e-12	0.27245	0.504	0.374		PTPN13	6.14621e-46	1.62284e-41	-0.609076	0.535	0.75		DSCAML1	2.17126e-19	5.733e-15	-0.39343	0.134	0.362		AF233439.1	1.42624e-17	3.76585e-13	1.13705	0.384	0.148
	FCHSD2	1.03648e-155	2.73672e-151	0.514994	0.378	0.11		SLC22A6	1.4346e-20	3.78792e-16	-0.318716	0.013	0.152		AC078980.1	5.06806e-122	1.33817e-117	-0.320083	0.009	0.178		PDE4D	3.20866e-16	8.47215e-12	-0.3017	0.735	0.806		NCOA7	1.30779e-45	3.4531e-41	-0.25301	0.022	0.16		NLGN4Y	2.9891e-19	7.89242e-15	-0.255381	0.053	0.217		PRKCA	1.60812e-17	4.24609e-13	0.493991	0.825	0.736
	HNF4A	1.09958e-155	2.90334e-151	-0.472884	0.21	0.534		SLC7A8	1.87016e-20	4.93798e-16	-0.393299	0.013	0.151		ACSL4	9.09215e-121	2.40069e-116	0.607144	0.45	0.243		UMOD	5.762e-16	1.5214e-11	-0.394927	0.126	0.237		NRXN3	1.34306e-45	3.54623e-41	-0.251689	0.015	0.142		ADAMTS3	3.55518e-19	9.38709e-15	-0.619826	0.21	0.462		CYP51A1	2.04128e-17	5.3898e-13	0.399335	0.253	0.042
	SULT1C4	1.46111e-155	3.85791e-151	0.420964	0.255	0.037		THBS2	1.90871e-20	5.03976e-16	0.162305	0.106	0.021		SKIL	4.03057e-120	1.06423e-115	0.265774	0.242	0.075		STAC2	8.22099e-16	2.17067e-11	0.154177	0.123	0.044		ABCA10	1.03249e-44	2.72618e-40	0.510305	0.47	0.188		MFHAS1	4.04532e-19	1.06813e-14	-0.539377	0.324	0.583		ASAP2	2.29805e-17	6.06776e-13	0.503866	0.701	0.516
	AC128707.1	1.87892e-155	4.9611e-151	-0.473021	0.037	0.302		DTNA	2.39316e-20	6.31889e-16	0.3341	0.571	0.364		WDFY2	5.12056e-120	1.35203e-115	-0.47358	0.276	0.51		NAMPT	1.00469e-15	2.65279e-11	0.212117	0.192	0.093		SLC16A7	1.07355e-44	2.8346e-40	0.46088	0.412	0.13		AC092153.1	6.37529e-19	1.68333e-14	-0.110866	0.003	0.071		SLC19A2	2.54045e-17	6.7078e-13	0.470868	0.306	0.083
	TINAG	3.18405e-155	8.40717e-151	-0.604155	0.501	0.796		MTHFD1L	2.86449e-20	7.56341e-16	0.283548	0.333	0.165		MTR	5.16906e-120	1.36484e-115	-0.390968	0.366	0.602		RNF144B	1.107e-15	2.92293e-11	0.35665	0.477	0.353		PTPRD	1.26976e-44	3.35267e-40	-0.333321	0.028	0.173		ZPLD1	6.53235e-19	1.7248e-14	-0.177353	0.006	0.083		VTCN1	3.20434e-17	8.46073e-13	-0.42468	0.082	0.249
	PEPD	2.27984e-154	6.0197e-150	-0.440421	0.154	0.466		MACF1	3.0974e-20	8.17836e-16	0.385675	0.775	0.622		HKDC1	1.88512e-118	4.97748e-114	0.220417	0.188	0.045		DGKH	1.23938e-15	3.27247e-11	0.248462	0.659	0.523		CD44	3.13e-44	8.26444e-40	-0.169889	0.003	0.098		AC019197.1	1.23472e-18	3.26016e-14	-0.494174	0.97	0.988		COL4A3	6.34054e-17	1.67416e-12	-0.299779	0.057	0.205
	CLDN10	1.66771e-153	4.40342e-149	-0.613476	0.489	0.77		RND3	3.29764e-20	8.7071e-16	0.190793	0.109	0.023		BICDL1	1.98491e-116	5.24097e-112	-0.492203	0.394	0.62		ACTN4	1.39495e-15	3.68323e-11	0.235722	0.362	0.232		ITPR1	1.60577e-43	4.23986e-39	0.489681	0.786	0.523		AC005699.1	1.53552e-18	4.05438e-14	-0.197374	0.019	0.129		HMGCS2	6.74127e-17	1.77997e-12	0.33053	0.216	0.021
	MIR100HG	5.17637e-153	1.36677e-148	-0.642253	0.35	0.643		NRCAM	4.13209e-20	1.09104e-15	0.492299	0.326	0.167		GPC5-AS2	1.9117e-115	5.04764e-111	-0.269313	0.025	0.2		MFSD4A	1.43867e-15	3.79867e-11	-0.148036	0.064	0.162		MRPS6	1.77225e-43	4.67945e-39	0.470354	0.492	0.206		COL4A3	1.55908e-18	4.11658e-14	-0.512384	0.309	0.571		DISC1	6.87104e-17	1.81423e-12	-0.148522	0.018	0.122
	GULP1	2.18236e-152	5.7623e-148	0.652643	0.516	0.231		NPL	4.42075e-20	1.16725e-15	-0.330191	0.072	0.238		NNT	3.04506e-115	8.04018e-111	-0.366246	0.2	0.433		MYOF	1.88628e-15	4.98053e-11	0.240626	0.435	0.304		MFHAS1	2.28105e-43	6.02288e-39	-0.539453	0.443	0.671		SOD2	1.67952e-18	4.43462e-14	-0.53515	0.14	0.358		WDFY2	7.43068e-17	1.962e-12	0.481591	0.462	0.234
	ANKS1B	3.37154e-152	8.90222e-148	-1.0621	0.313	0.566		EXT1	4.72844e-20	1.2485e-15	0.381661	0.732	0.571		ITPR2	3.82883e-115	1.01096e-110	-0.404068	0.46	0.672		MSR1	1.88674e-15	4.98174e-11	-0.297779	0.279	0.417		EGFR	2.71995e-43	7.18174e-39	-0.248223	0.032	0.181		SCN7A	2.13216e-18	5.62974e-14	0.645357	0.408	0.125		PGM2L1	8.11917e-17	2.14379e-12	-0.173674	0.027	0.142
	TRIO	4.08416e-152	1.07838e-147	0.679158	0.722	0.489		ENAH	5.23144e-20	1.38131e-15	0.323633	0.378	0.208		BNC2	4.44391e-115	1.17337e-110	0.35949	0.29	0.109		GULP1	3.04944e-15	8.05175e-11	0.343556	0.442	0.318		KCP	3.26132e-43	8.61119e-39	-0.144731	0.006	0.106		SCN2A	2.90959e-18	7.68249e-14	-0.523248	0.661	0.867		KLF6	9.75217e-17	2.57496e-12	0.49883	0.383	0.148
	SLC17A1	6.21788e-152	1.64177e-147	-0.61713	0.68	0.888		ASPA	1.05842e-19	2.79466e-15	-0.255362	0.067	0.231		CACNB4	1.59198e-114	4.20346e-110	-0.408816	0.067	0.264		ZDHHC14	3.36849e-15	8.89416e-11	0.254937	0.517	0.383		TMTC2	4.55783e-43	1.20345e-38	-0.646987	0.347	0.599		ENC1	3.11208e-18	8.21715e-14	-0.114575	0.008	0.092		GDF15	1.34665e-16	3.55569e-12	0.47635	0.543	0.303
	ZNF804B	5.63201e-151	1.48708e-146	-0.746479	0.354	0.674		ANK2	1.0765e-19	2.84239e-15	-0.641039	0.29	0.473		FHIT	1.63228e-114	4.30987e-110	-0.417807	0.834	0.923		ELF3	5.55881e-15	1.46775e-10	0.222628	0.291	0.173		EPB41L3	7.13084e-43	1.88283e-38	0.555153	0.503	0.222		WASF1	4.06381e-18	1.07301e-13	-0.110002	0.008	0.092		THSD4	1.38163e-16	3.64806e-12	0.48824	0.656	0.43
	HPD	6.54944e-150	1.72931e-145	-0.386969	0.022	0.269		BBOX1	1.13482e-19	2.99637e-15	-0.354012	0.114	0.296		LIFR	2.54157e-114	6.71076e-110	-0.394447	0.292	0.528		DNAH5	5.90984e-15	1.56043e-10	0.222058	0.327	0.208		ITPKB	7.759e-43	2.04869e-38	0.475054	0.474	0.199		CLU	5.21567e-18	1.37714e-13	-0.248148	0.044	0.188		ERP27	1.57213e-16	4.15104e-12	-0.161066	0.019	0.122
	FHIT	2.12367e-149	5.60733e-145	-0.461242	0.921	0.986		GLS	1.56523e-19	4.13283e-15	0.606459	0.76	0.646		MFHAS1	3.45271e-114	9.11653e-110	0.422344	0.615	0.405		SPNS2	6.31354e-15	1.66703e-10	0.139018	0.116	0.042		ST5	1.5074e-42	3.98014e-38	-0.500966	0.21	0.445		AF233439.1	5.43983e-18	1.43633e-13	1.1672	0.57	0.304		LIPG	1.74305e-16	4.60235e-12	-0.206235	0.033	0.154
	EYA2	2.92532e-148	7.72401e-144	-0.538446	0.144	0.443		TCIM	2.29954e-19	6.07171e-15	0.110448	0.072	0.009		HIVEP3	3.8824e-114	1.02511e-109	0.370189	0.328	0.138		MAST4	6.52986e-15	1.72414e-10	0.29555	0.614	0.488		FYB2	2.60739e-42	6.88456e-38	-0.192623	0.007	0.109		ANGPT1	7.05012e-18	1.86151e-13	0.609674	0.394	0.112		ZFHX4	1.79522e-16	4.74009e-12	-0.193175	0.033	0.154
	EFCAB13	7.15526e-148	1.88927e-143	0.436136	0.292	0.061		MFSD4B	2.762e-19	7.2928e-15	-0.385443	0.38	0.558		ETV6	6.99105e-114	1.84592e-109	0.365669	0.421	0.212		TMEM72	6.57908e-15	1.73714e-10	-0.175298	0.142	0.26		ROBO1	3.03652e-42	8.01762e-38	-0.28157	0.051	0.218		MAN1A1	8.31365e-18	2.19514e-13	0.595751	0.585	0.321		ARMC3	1.80768e-16	4.77299e-12	-0.159984	0.023	0.131
	SLC34A1	7.92608e-148	2.0928e-143	-0.517083	0.153	0.473		HIF1A	2.85387e-19	7.53535e-15	0.417479	0.467	0.287		ACSS1	1.31098e-113	3.46151e-109	-0.327402	0.12	0.338		MMP7	8.29749e-15	2.19087e-10	0.192727	0.15	0.066		ZDHHC14	3.24554e-42	8.56952e-38	0.533882	0.569	0.294		DST	1.38753e-17	3.66364e-13	-0.253828	0.069	0.242		GULP1	1.95798e-16	5.16985e-12	-0.400459	0.182	0.389
	HGD	1.3853e-147	3.65774e-143	-0.447939	0.158	0.459		CD2AP	3.16061e-19	8.34529e-15	0.325008	0.651	0.471		ADGRF1	2.07295e-113	5.4734e-109	0.27507	0.275	0.1		TENM4	9.71621e-15	2.56547e-10	0.283161	0.372	0.252		WWTR1	3.9242e-42	1.03615e-37	-0.588093	0.347	0.579		RNF144B	1.43902e-17	3.79959e-13	-0.254215	0.076	0.254		GSTP1	2.06966e-16	5.46474e-12	-0.151646	0.031	0.151
	DIO1	2.91363e-147	7.69314e-143	-0.392384	0.043	0.301		SLC22A8	4.14808e-19	1.09526e-14	-0.21298	0.002	0.122		LINC00621	3.92458e-113	1.03625e-108	0.383777	0.219	0.067		LINC02532	1.01299e-14	2.67469e-10	0.257066	0.699	0.566		LINC01762	5.18885e-42	1.37006e-37	0.517298	0.748	0.485		HMGCS2	1.50742e-17	3.98018e-13	0.43292	0.257	0.008		ASAP1	2.10925e-16	5.56927e-12	-0.304516	0.207	0.43
	ARHGAP26	4.98884e-147	1.31725e-142	0.681617	0.609	0.335		TJP1	6.85109e-19	1.80896e-14	0.296052	0.54	0.34		HIF1A-AS3	6.35087e-113	1.67688e-108	0.316815	0.245	0.083		PCSK1N	1.19474e-14	3.15458e-10	-0.129756	0.032	0.11		UGCG	5.46211e-42	1.44222e-37	-0.397311	0.112	0.318		AC138305.1	1.59592e-17	4.21386e-13	0.765421	0.618	0.371		ST5	2.41488e-16	6.37625e-12	-0.306651	0.106	0.282
	EPB41L2	7.81877e-147	2.06447e-142	0.391767	0.327	0.08		ALDH1L1	6.92712e-19	1.82904e-14	-0.256755	0.086	0.255		GRIP1	7.15927e-113	1.89033e-108	0.330652	0.272	0.097		ARHGAP24	1.72915e-14	4.56564e-10	-0.261297	0.674	0.765		MAGI2	6.14182e-42	1.62169e-37	0.605058	0.712	0.478		ST6GAL1	1.71929e-17	4.53961e-13	-0.379681	0.211	0.467		LIPC	2.67232e-16	7.056e-12	-0.245878	0.107	0.288
	XPNPEP2	1.45325e-145	3.83715e-141	-0.367612	0.029	0.276		TLE1	7.02397e-19	1.85461e-14	0.235857	0.268	0.12		STPG2	2.34973e-112	6.20422e-108	-0.429295	0.311	0.543		NTNG1	2.11127e-14	5.5746e-10	0.128128	0.091	0.028		VPS13C	6.21802e-42	1.64181e-37	-0.41066	0.276	0.53		PLCL1	2.12751e-17	5.61747e-13	0.740202	0.585	0.317		HIST1H2AC	2.90569e-16	7.6722e-12	0.822243	0.535	0.323
	SLC16A12	6.57129e-145	1.73508e-140	-0.782311	0.462	0.722		PLCB4	7.18881e-19	1.89813e-14	0.627931	0.48	0.313		MRPS6	4.90234e-112	1.29441e-107	-0.451894	0.328	0.545		LIPC	2.53268e-14	6.68728e-10	0.153291	0.202	0.104		NLGN4Y	7.22252e-42	1.90703e-37	-0.450444	0.178	0.409		KCNJ3	2.33778e-17	6.17268e-13	0.590079	0.59	0.338		KCNK1	2.98581e-16	7.88373e-12	-0.215523	0.045	0.178
	IGFBP7	7.60447e-145	2.00788e-140	0.645256	0.487	0.199		KITLG	8.90815e-19	2.35211e-14	0.245971	0.157	0.05		NCOA7	1.3892e-111	3.66804e-107	0.47616	0.416	0.219		SHROOM3	2.89856e-14	7.65337e-10	0.291085	0.432	0.315		BHLHE40	1.22375e-41	3.23118e-37	-0.293524	0.045	0.203		SLCO3A1	2.37016e-17	6.25817e-13	-0.252255	0.061	0.225		SLC22A18	2.99905e-16	7.91868e-12	-0.181144	0.043	0.175
	BCL2	1.86797e-143	4.9322e-139	0.665122	0.69	0.441		AKAP12	1.87572e-18	4.95266e-14	0.445021	0.504	0.316		KALRN	1.25333e-110	3.3093e-106	0.196984	0.137	0.023		GALNT14	3.00466e-14	7.9335e-10	0.251469	0.487	0.357		TPM1	1.23797e-41	3.26873e-37	-0.29188	0.065	0.243		PTH2R	3.30379e-17	8.72332e-13	0.586099	0.889	0.721		UGT2B7	3.73822e-16	9.8704e-12	-0.275477	0.056	0.199
	SLC66A2	3.13125e-143	8.26775e-139	-0.458891	0.117	0.404		Z93403.1	2.65726e-18	7.01622e-14	-0.369844	0.261	0.447		KCNJ3	6.42659e-110	1.69688e-105	-0.408553	0.17	0.393		APBB2	3.38345e-14	8.93365e-10	0.225251	0.571	0.435		PSD3	1.42872e-41	3.7724e-37	-0.248724	0.021	0.148		PLCE1	3.38957e-17	8.94982e-13	-0.134474	0.015	0.112		SLC1A1	5.3939e-16	1.42421e-11	-0.2261	0.066	0.217
	HIST1H2AC	4.02002e-143	1.06145e-138	0.5069	0.231	0.032		STAC	2.67419e-18	7.06094e-14	0.153946	0.117	0.03		CADM1	1.03943e-109	2.74452e-105	-0.435404	0.364	0.59		FGFR2	7.98467e-14	2.10827e-09	0.211224	0.321	0.205		OSMR-AS1	2.27695e-41	6.01206e-37	-0.352336	0.119	0.327		SHROOM3	5.53987e-17	1.46275e-12	-0.488346	0.303	0.558		SREBF1	5.95956e-16	1.57356e-11	0.492376	0.27	0.065
	AL121999.1	8.18765e-143	2.16187e-138	-0.400059	0.05	0.307		ACSF2	2.70407e-18	7.13982e-14	-0.290571	0.078	0.236		CFAP54	3.45074e-109	9.11133e-105	0.209928	0.15	0.03		NCEH1	8.08263e-14	2.13414e-09	0.268712	0.326	0.212		MIR4435-2HG	2.68015e-41	7.07667e-37	-0.380392	0.126	0.341		PMEPA1	5.96459e-17	1.57489e-12	-0.160075	0.019	0.121		MET	7.59623e-16	2.00571e-11	-0.273179	0.048	0.181
	CMBL	1.7765e-142	4.69068e-138	-0.430447	0.078	0.35		FGGY	2.98447e-18	7.88018e-14	-0.37954	0.343	0.523		AC011586.2	1.15231e-108	3.04256e-104	0.424959	0.383	0.184		GP2	1.0744e-13	2.83684e-09	-0.14483	0.036	0.112		MYRFL	2.69939e-41	7.12747e-37	-0.378632	0.187	0.427		EFNA5	5.9827e-17	1.57967e-12	-0.525105	0.482	0.758		SLC3A1	8.11337e-16	2.14225e-11	-0.240251	0.079	0.237
	SEMA5A	2.78257e-142	7.3471e-138	0.797338	0.688	0.44		HPN	3.1187e-18	8.23463e-14	-0.296438	0.24	0.434		TBL1XR1	1.27868e-108	3.37622e-104	0.386005	0.52	0.307		HRH1	1.37807e-13	3.63865e-09	0.109902	0.079	0.022		LRP1B	2.98513e-41	7.88194e-37	-0.697444	0.424	0.664		HES1	6.59412e-17	1.74111e-12	1.06788	0.474	0.217		AC022424.2	1.15691e-15	3.05469e-11	-0.177497	0.035	0.154
	IQGAP2	4.1927e-142	1.10704e-137	-0.488999	0.232	0.537		NOX4	4.18493e-18	1.10499e-13	-0.650843	0.447	0.591		KLF7	2.16064e-108	5.70495e-104	0.269043	0.241	0.081		PDK4	1.57796e-13	4.16644e-09	-0.253507	0.103	0.204		CALB1	4.7651e-41	1.25818e-36	0.645837	0.236	0.014		STOX2	6.72482e-17	1.77562e-12	-0.429047	0.259	0.508		CNTNAP3B	1.20922e-15	3.19281e-11	-0.619739	0.416	0.599
	TNFAIP2	6.98337e-142	1.84389e-137	0.381606	0.239	0.036		FGD6	4.27912e-18	1.12986e-13	0.290796	0.388	0.224		USP2	7.5016e-108	1.98072e-103	-0.275692	0.053	0.238		HIF1A-AS3	1.65933e-13	4.38129e-09	0.195033	0.316	0.201		PTCHD1-AS	6.81831e-41	1.80031e-36	0.789824	0.318	0.075		FYN	6.83158e-17	1.80381e-12	-0.128255	0.01	0.092		CCNL1	1.21916e-15	3.21907e-11	0.494452	0.494	0.273
	GALNT18	1.81722e-141	4.79819e-137	-0.637618	0.197	0.491		MYH9	4.58953e-18	1.21182e-13	0.273441	0.303	0.154		AFF1	2.62657e-107	6.9352e-103	0.456082	0.613	0.416		CLIP2	1.67133e-13	4.41297e-09	0.116771	0.142	0.063		SYNE2	8.50001e-41	2.24434e-36	-0.537563	0.389	0.631		CXCL2	8.31831e-17	2.19637e-12	-0.123715	0.006	0.079		COL27A1	1.45999e-15	3.85496e-11	-0.189554	0.041	0.166
	TPD52	3.23364e-141	8.5381e-137	-0.527135	0.18	0.471		PBLD	5.06851e-18	1.33829e-13	-0.240524	0.098	0.264		FREM1	2.87918e-107	7.60219e-103	-0.397148	0.21	0.435		U91319.1	2.44145e-13	6.44642e-09	0.135141	0.137	0.059		HKDC1	1.64535e-40	4.34437e-36	-0.20145	0.022	0.149		MTR	8.34282e-17	2.20284e-12	0.504098	0.65	0.412		TRPV6	1.58433e-15	4.18326e-11	-0.16896	0.036	0.157
	XYLB	1.44553e-140	3.81677e-136	-0.503297	0.344	0.642		PDZK1	5.11246e-18	1.34989e-13	-0.348275	0.426	0.579		PRDM16	3.75747e-107	9.92123e-103	-0.356681	0.254	0.483		HUNK	2.79475e-13	7.37926e-09	0.148374	0.207	0.111		UGT2B7	1.71047e-40	4.51631e-36	-0.337456	0.037	0.182		DYRK2	9.29399e-17	2.45398e-12	-0.116412	0.011	0.096		LINC00278	1.78208e-15	4.70541e-11	0.50276	0.383	0.154
	DRAIC	1.49707e-140	3.95286e-136	-0.423311	0.048	0.301		SLC38A1	5.54609e-18	1.46439e-13	0.179997	0.209	0.082		PARP4	1.35803e-106	3.58575e-102	0.24063	0.242	0.082		THBS1	2.87794e-13	7.59891e-09	0.117157	0.079	0.023		ZFPM2	1.88256e-40	4.97071e-36	-0.276328	0.021	0.145		SVIL	1.07269e-16	2.83232e-12	-0.425214	0.161	0.379		OSMR-AS1	1.81762e-15	4.79924e-11	-0.246073	0.093	0.258
	NLGN1	2.32983e-140	6.15169e-136	-0.6474	0.695	0.882		PLK2	6.45576e-18	1.70458e-13	0.135407	0.098	0.021		STAC2	1.48629e-106	3.92441e-102	0.144295	0.075	0.002		GRIP1	4.16839e-13	1.10062e-08	0.235218	0.343	0.227		NRP1	2.03271e-40	5.36716e-36	-0.496992	0.162	0.385		ARNTL2	1.23172e-16	3.25223e-12	-0.153531	0.008	0.083		SH3BP2	1.95308e-15	5.1569e-11	-0.179945	0.044	0.172
	RMST	2.58792e-139	6.83313e-135	-0.660578	0.489	0.762		ADAM12	6.45586e-18	1.70461e-13	0.172723	0.129	0.037		COL7A1	7.48421e-106	1.97613e-101	0.159273	0.099	0.009		NNMT	4.18838e-13	1.1059e-08	0.156411	0.126	0.053		AC044810.2	3.22573e-40	8.51723e-36	-0.156328	0.003	0.088		ZNF608	1.33063e-16	3.51339e-12	-0.429878	0.207	0.438		CYYR1	3.1293e-15	8.26261e-11	-0.203762	0.043	0.169
	SLC25A42	2.78288e-139	7.34791e-135	-0.43214	0.127	0.414		AC087482.1	7.1698e-18	1.89311e-13	-0.220805	0.026	0.158		FHL2	7.79634e-105	2.05855e-100	0.181907	0.111	0.014		MTR	4.30297e-13	1.13616e-08	-0.200297	0.289	0.415		NFIB	3.43299e-40	9.06446e-36	-0.447162	0.168	0.392		AC092683.1	1.50327e-16	3.96924e-12	-0.242857	0.107	0.304		HMGCR	3.44633e-15	9.09969e-11	0.417791	0.238	0.047
	PARD3B	1.28238e-138	3.38599e-134	0.59125	0.78	0.578		TPK1	7.21898e-18	1.9061e-13	0.355746	0.393	0.225		LIX1	2.65943e-104	7.02195e-100	0.13719	0.09	0.007		PRKCE	5.02255e-13	1.32615e-08	0.240732	0.463	0.35		RIMBP2	4.16279e-40	1.09914e-35	-0.255586	0.053	0.217		LINC02694	2.25808e-16	5.96224e-12	0.727122	0.455	0.192		AC020916.1	3.77586e-15	9.96977e-11	0.404176	0.22	0.033
	DMGDH	1.31486e-138	3.47176e-134	-0.500543	0.309	0.602		DMGDH	1.15846e-17	3.0588e-13	-0.292079	0.175	0.349		DAPK1	3.74e-104	9.87509e-100	0.459046	0.623	0.44		NEDD9	5.15135e-13	1.36016e-08	0.208212	0.321	0.21		AC019197.1	5.30441e-40	1.40058e-35	-0.541432	0.917	0.974		LHFPL6	2.43007e-16	6.41636e-12	-0.129125	0.009	0.088		LHX1-DT	4.82078e-15	1.27288e-10	-0.309132	0.205	0.412
	AL391117.1	1.90185e-138	5.02166e-134	-0.636788	0.455	0.724		ARNTL2	1.16487e-17	3.07571e-13	0.146329	0.129	0.037		CLCNKB	4.53205e-104	1.19664e-99	-0.299473	0.122	0.33		STRN3	5.71269e-13	1.50838e-08	0.204097	0.485	0.363		NEAT1	5.47242e-40	1.44494e-35	-0.614496	0.907	0.97		NRXN3	2.76635e-16	7.30426e-12	-0.178042	0.012	0.096		LHFPL6	5.39069e-15	1.42336e-10	-0.140306	0.007	0.08
	ACSM2A	2.07742e-138	5.48523e-134	-0.55744	0.873	0.971		PISD	1.83532e-17	4.84599e-13	0.245113	0.365	0.201		MYO1D	6.11323e-104	1.61414e-99	0.308298	0.37	0.174		ATP6V1B1	5.99025e-13	1.58167e-08	-0.115707	0.047	0.126		MTR	5.79625e-40	1.53044e-35	0.435597	0.634	0.372		ETV6	6.41901e-16	1.69487e-11	-0.375615	0.273	0.521		LDLR	7.27844e-15	1.9218e-10	0.452073	0.189	0.018
	SORD	2.07067e-137	5.46739e-133	-0.400902	0.067	0.327		LRRFIP2	2.0203e-17	5.3344e-13	0.330506	0.527	0.355		TMEM163	1.55562e-103	4.10745e-99	0.1991	0.148	0.031		ANKRD33B	7.5106e-13	1.9831e-08	0.11305	0.099	0.036		VDR	8.28657e-40	2.18799e-35	0.436288	0.324	0.077		ADAM10	7.06903e-16	1.86651e-11	-0.428169	0.365	0.625		PIGQ	7.42924e-15	1.96162e-10	0.357679	0.341	0.128
	FHOD3	3.89244e-137	1.02776e-132	0.645486	0.732	0.51		SOX4	2.2853e-17	6.03412e-13	0.261438	0.294	0.146		MMP7	5.12595e-103	1.35346e-98	0.165975	0.098	0.01		TBC1D24	7.68666e-13	2.02959e-08	-0.126582	0.061	0.144		NAALADL2	8.30022e-40	2.19159e-35	-0.532454	0.819	0.914		LINC01482	9.08027e-16	2.39756e-11	-0.426208	0.18	0.404		SHROOM3	9.5865e-15	2.53122e-10	-0.416847	0.334	0.549
	RNF144B	4.09142e-137	1.0803e-132	0.365673	0.203	0.021		ARHGEF38	2.50862e-17	6.62376e-13	0.210668	0.214	0.089		LRBA	1.12873e-102	2.98029e-98	-0.343527	0.853	0.926		GLS	7.93861e-13	2.09611e-08	0.377903	0.609	0.515		PLCH1	1.22867e-39	3.24418e-35	-0.238755	0.048	0.206		LINC00937	9.95225e-16	2.62779e-11	-0.129989	0.016	0.108		SORBS2	1.04395e-14	2.75643e-10	-0.363221	0.393	0.626
	ENPP6	7.55444e-137	1.99467e-132	-0.458201	0.082	0.346		ITGAV	2.85687e-17	7.54328e-13	0.352968	0.556	0.381		RGS6	1.17895e-102	3.1129e-98	-0.540299	0.068	0.25		NUDT4	8.64884e-13	2.28364e-08	-0.186893	0.18	0.295		MITF	1.9106e-39	5.04475e-35	0.470063	0.823	0.648		COBLL1	1.00805e-15	2.66166e-11	0.63698	0.972	0.946		SNX10	1.15218e-14	3.04222e-10	-0.162758	0.033	0.145
	FTL	2.72643e-136	7.19887e-132	-0.735232	0.307	0.596		LINC00871	3.85967e-17	1.01911e-12	-0.585245	0.246	0.417		STK32B	3.12536e-102	8.25219e-98	-0.390301	0.437	0.658		GNAI1	9.47991e-13	2.50308e-08	-0.271739	0.414	0.525		BTBD11	2.79443e-39	7.37842e-35	0.41425	0.424	0.152		TTC39A	1.37761e-15	3.63743e-11	-0.169091	0.032	0.15		PTPRK	1.16574e-14	3.07802e-10	-0.448079	0.445	0.635
	TNIK	2.74596e-136	7.25044e-132	0.593184	0.655	0.397		RALYL	3.87578e-17	1.02336e-12	-0.617434	0.214	0.384		TOX	3.13855e-102	8.28702e-98	-0.416195	0.174	0.384		FGF9	1.04677e-12	2.7639e-08	-0.157625	0.12	0.222		GAD1	6.75564e-39	1.78376e-34	0.405974	0.275	0.046		ASAP2	1.38468e-15	3.65611e-11	0.499491	0.736	0.546		LMO7-AS1	1.23441e-14	3.25933e-10	-0.160694	0.044	0.169
	AL117382.1	1.96392e-135	5.18554e-131	-0.324185	0.01	0.226		ICAM1	4.12313e-17	1.08867e-12	0.186616	0.103	0.025		DNAH5	3.69909e-102	9.76708e-98	0.263633	0.254	0.093		KLF6	1.27064e-12	3.35499e-08	0.353723	0.348	0.25		PPP1R9A	9.29113e-39	2.45323e-34	-0.441133	0.397	0.641		SPATA6L	2.29076e-15	6.04851e-11	-0.226555	0.075	0.238		DEFB1	1.4118e-14	3.72771e-10	0.783324	0.334	0.136
	FAM135B	2.6507e-135	6.99891e-131	0.466185	0.266	0.054		AC098588.3	4.49061e-17	1.1857e-12	-0.298293	0.083	0.236		PARP14	1.03719e-101	2.7386e-97	0.24227	0.261	0.097		FOXP1	1.73867e-12	4.59077e-08	0.218577	0.679	0.573		THRB	1.56914e-38	4.14317e-34	0.467047	0.592	0.338		LINC01762	2.54476e-15	6.71918e-11	-0.47944	0.229	0.454		CDH4	1.45775e-14	3.84903e-10	-0.148931	0.025	0.128
	DPF3	3.46722e-135	9.15483e-131	-0.403492	0.094	0.365		TANK	4.73365e-17	1.24987e-12	0.263721	0.346	0.189		ANXA3	1.05499e-101	2.7856e-97	0.159386	0.117	0.018		RHPN2	1.87014e-12	4.93792e-08	0.162794	0.268	0.165		TNFAIP2	1.96037e-38	5.17617e-34	-0.160397	0.004	0.088		SLC2A13	2.8033e-15	7.40182e-11	-0.19542	0.049	0.188		FYB2	1.76869e-14	4.67005e-10	-0.445968	0.637	0.813
	CACNA2D3	7.95973e-135	2.10169e-130	0.358507	0.231	0.035		ABCC3	5.28379e-17	1.39513e-12	0.270705	0.444	0.263		LRRK2	1.74638e-101	4.61114e-97	0.483765	0.464	0.27		SLC35F5	1.96439e-12	5.18676e-08	0.266808	0.584	0.48		SYTL2	2.06856e-38	5.46184e-34	-0.449624	0.237	0.47		KLF7	3.03603e-15	8.01635e-11	-0.164254	0.024	0.129		SOX6	1.80611e-14	4.76886e-10	-0.448241	0.636	0.813
	MAPT	1.59748e-134	4.21797e-130	-0.452603	0.162	0.453		PDLIM1	5.49001e-17	1.44958e-12	0.181793	0.197	0.079		SDK1	2.04492e-101	5.39941e-97	0.456268	0.364	0.177		NR2F2-AS1	2.01123e-12	5.31046e-08	-0.235943	0.678	0.753		TBL1XR1	4.32249e-38	1.14131e-33	-0.4404	0.251	0.486		ZBTB7C	3.07565e-15	8.12094e-11	-0.197712	0.035	0.154		CD74	2.06006e-14	5.43939e-10	-0.17137	0.034	0.145
	GHR	4.26647e-134	1.12652e-129	-0.514189	0.189	0.478		ZEB1	6.87561e-17	1.81544e-12	0.306743	0.336	0.183		FAM184A	2.23053e-101	5.88949e-97	-0.347159	0.263	0.484		HIP1	2.02941e-12	5.35845e-08	-0.231787	0.386	0.508		DGKH	4.53931e-38	1.19856e-33	-0.386484	0.157	0.373		LINC01811	3.23448e-15	8.54033e-11	-0.108107	0.004	0.062		UNC5CL	2.09601e-14	5.53432e-10	-0.139953	0.024	0.125
	CTSH	4.47381e-134	1.18127e-129	-0.415093	0.074	0.332		INSR	8.17345e-17	2.15812e-12	-0.352268	0.457	0.616		AK3	2.13076e-100	5.62606e-96	-0.363709	0.412	0.619		PLCG2	2.16651e-12	5.72045e-08	0.200429	0.404	0.266		ULK4	7.02798e-38	1.85567e-33	-0.407153	0.209	0.436		PAX8-AS1	3.44722e-15	9.10205e-11	-0.41109	0.326	0.571		SOD2	2.20189e-14	5.81387e-10	-0.29633	0.13	0.309
	ESPN	4.53771e-134	1.19814e-129	-0.34815	0.029	0.261		AC096577.1	9.15928e-17	2.41842e-12	-0.776034	0.281	0.437		TNFAIP2	3.68132e-100	9.72016e-96	0.169945	0.112	0.016		CHST9	2.2958e-12	6.06183e-08	0.220484	0.249	0.149		WNK4	8.13455e-38	2.14785e-33	0.35603	0.382	0.126		PPP2R2B	3.62714e-15	9.57709e-11	-0.462073	0.091	0.262		GADD45B	2.27143e-14	5.99749e-10	0.444451	0.378	0.169
	UNC5D	2.13989e-133	5.65016e-129	0.638918	0.379	0.129		PAX8	1.22024e-16	3.22193e-12	0.350293	0.902	0.825		ARHGAP6	3.94363e-100	1.04128e-95	-0.42694	0.768	0.891		ABCB1	2.34342e-12	6.18757e-08	0.114506	0.081	0.026		CADPS2	9.82084e-38	2.5931e-33	0.572792	0.767	0.568		TMEM176B	6.16035e-15	1.62658e-10	-0.195975	0.047	0.179		RCAN2	2.31338e-14	6.10826e-10	-0.312243	0.114	0.279
	MYOF	3.56088e-133	9.40214e-129	0.254532	0.17	0.009		DIAPH3	1.5274e-16	4.03294e-12	0.194654	0.181	0.07		THSD7A	1.06697e-99	2.81724e-95	-0.43698	0.487	0.677		LAMB4	2.39061e-12	6.31217e-08	-0.126202	0.015	0.072		PARP4	1.30588e-37	3.44805e-33	-0.225457	0.047	0.198		UNC79	6.39231e-15	1.68783e-10	-0.16229	0.028	0.138		ROR1	2.6654e-14	7.03773e-10	-0.200222	0.034	0.145
	AC108519.1	6.0633e-133	1.60095e-128	-0.546832	0.372	0.653		CRIM1	1.61583e-16	4.26644e-12	0.427215	0.486	0.325		PLSCR1	1.32057e-99	3.48683e-95	0.286578	0.283	0.117		NEDD4	2.39825e-12	6.33234e-08	0.115716	0.134	0.06		TCF7L1	1.46077e-37	3.85701e-33	-0.14727	0.004	0.088		TEAD4	6.52605e-15	1.72314e-10	-0.125454	0.019	0.112		BCL2L15	3.12793e-14	8.25898e-10	-0.109111	0.007	0.077
	ANXA2	1.99725e-132	5.27354e-128	0.272605	0.172	0.01		DDX21	1.69398e-16	4.47279e-12	0.157231	0.171	0.063		TNFSF10	1.35577e-99	3.57977e-95	0.258121	0.177	0.048		IGF2BP2	2.43802e-12	6.43734e-08	0.224849	0.381	0.269		CFAP54	2.73424e-37	7.2195e-33	-0.187072	0.019	0.134		AC004870.2	8.20076e-15	2.16533e-10	-0.168761	0.02	0.117		PAPPA	3.43863e-14	9.07936e-10	0.614679	0.477	0.282
	SGPP2	7.50395e-132	1.98134e-127	0.276656	0.157	0.005		NFKB1	2.07517e-16	5.47928e-12	0.327162	0.414	0.25		GABRP	1.62038e-99	4.27844e-95	0.13709	0.077	0.004		CDK6	2.54021e-12	6.70718e-08	0.146613	0.226	0.129		NTNG1	3.32119e-37	8.76927e-33	-0.161163	0.002	0.079		MAP3K14	1.12426e-14	2.96848e-10	-0.224849	0.078	0.238		TPM1	3.49483e-14	9.22775e-10	-0.289977	0.16	0.347
	ARHGAP29	2.31638e-131	6.11616e-127	0.626743	0.573	0.316		BHMT	2.18878e-16	5.77926e-12	-0.35135	0.173	0.339		SAMD12	1.65149e-99	4.3606e-95	0.400269	0.727	0.559		STK33	2.68344e-12	7.08535e-08	0.1782	0.416	0.293		ETV6	3.91319e-37	1.03324e-32	-0.346394	0.196	0.425		SCTR	1.16315e-14	3.07119e-10	-0.140755	0.015	0.1		SOX5	3.66987e-14	9.68991e-10	0.557805	0.678	0.501
	SDK1	3.53723e-131	9.33971e-127	0.610399	0.66	0.368		TNRC6A	2.46998e-16	6.52174e-12	-0.378507	0.512	0.648		LAMC2	1.99616e-99	5.27067e-95	0.168704	0.111	0.016		CFAP54	3.00748e-12	7.94094e-08	0.162146	0.206	0.114		CNTN3	4.37646e-37	1.15556e-32	-0.179268	0.021	0.14		PIGR	1.37765e-14	3.63756e-10	-0.173979	0.022	0.121		AC012593.1	4.38894e-14	1.15886e-09	-0.178675	0.036	0.148
	SLC5A11	1.38548e-130	3.65822e-126	-0.431422	0.03	0.258		CGNL1	2.70756e-16	7.14904e-12	-0.436415	0.246	0.408		ITM2C	5.70782e-99	1.50709e-94	0.188358	0.148	0.033		AC092546.1	3.04882e-12	8.0501e-08	-0.12731	0.038	0.109		SLC9A3-AS1	5.6103e-37	1.48134e-32	-0.15408	0.014	0.12		PARP14	1.48911e-14	3.93183e-10	-0.241187	0.095	0.267		SLC4A4	4.45189e-14	1.17548e-09	0.498471	0.521	0.306
	POR	2.0551e-130	5.42629e-126	-0.523875	0.138	0.408		SLC3A1	2.98142e-16	7.87213e-12	-0.313262	0.369	0.54		ZEB1	1.82216e-98	4.81124e-94	0.205827	0.154	0.036		SORCS3	3.16177e-12	8.34834e-08	0.169666	0.207	0.116		DLG2	5.85664e-37	1.54639e-32	-0.423101	0.122	0.32		SASH1	1.61075e-14	4.25303e-10	-0.29463	0.13	0.321		MXD1	4.84178e-14	1.27842e-09	0.520659	0.185	0.021
	PPP1R9A	2.61133e-130	6.89496e-126	0.547194	0.61	0.354		GRIP1	3.00213e-16	7.92681e-12	0.318075	0.599	0.427		BICC1	2.66347e-98	7.03262e-94	0.639907	0.863	0.813		CLEC16A	3.22049e-12	8.50339e-08	0.190009	0.475	0.356		SHC3	1.00037e-36	2.64138e-32	0.339822	0.268	0.046		HLA-A	2.26347e-14	5.97647e-10	-0.170879	0.029	0.138		COLEC10	7.58889e-14	2.00377e-09	-0.17137	0.034	0.142
	PSD3	3.30659e-130	8.73072e-126	0.346155	0.161	0.007		FHL2	3.03847e-16	8.02278e-12	0.145017	0.121	0.035		FGF9	3.235e-98	8.54169e-94	-0.318257	0.182	0.394		TNIK	4.047e-12	1.06857e-07	0.195969	0.342	0.227		LINC02694	1.65506e-36	4.37003e-32	0.522638	0.398	0.151		MAST4	2.75487e-14	7.27396e-10	-0.347387	0.141	0.338		MGAM	8.91366e-14	2.35356e-09	-0.190717	0.046	0.166
	AC244502.1	2.95883e-129	7.8125e-125	-0.40502	0.01	0.218		ABCC6	3.52098e-16	9.2968e-12	-0.26686	0.175	0.34		SEMA5B	4.8039e-98	1.26842e-93	0.119649	0.078	0.004		AC009478.1	4.12136e-12	1.0882e-07	-0.192565	0.17	0.278		GGT2	1.87798e-36	4.95863e-32	-0.279133	0.037	0.174		PLEKHH2	3.06671e-14	8.09734e-10	-0.362438	0.161	0.358		TSC22D3	9.49427e-14	2.50687e-09	0.352211	0.215	0.042
	ELF3	1.33988e-128	3.53781e-124	0.38575	0.215	0.031		CCL2	4.44118e-16	1.17265e-11	0.147139	0.098	0.024		PPP2R2B	8.35873e-98	2.20704e-93	-0.328079	0.108	0.304		BCL6	4.66852e-12	1.23268e-07	0.142498	0.176	0.093		LRCH1	1.98812e-36	5.24943e-32	0.526643	0.691	0.494		DEFB1	3.84347e-14	1.01483e-09	0.747964	0.511	0.288		GATA2	9.77026e-14	2.57974e-09	0.500923	0.368	0.172
	IFNAR2	2.11592e-128	5.58687e-124	0.339919	0.247	0.047		SHMT1	5.40556e-16	1.42728e-11	-0.239028	0.129	0.289		CCDC148	1.72173e-97	4.54606e-93	-0.435873	0.485	0.676		TFPI	4.73426e-12	1.25003e-07	0.24525	0.364	0.258		PGGHG	2.54973e-36	6.7323e-32	-0.128056	0.004	0.084		CACNA2D3	4.05545e-14	1.0708e-09	-0.265086	0.078	0.238		XIST	1.22538e-13	3.23549e-09	-0.270095	0.214	0.448
	TRPV4	2.66384e-128	7.03361e-124	-0.410852	0.169	0.454		TJP2	6.69349e-16	1.76735e-11	0.363059	0.506	0.348		GDF15	2.08134e-97	5.49558e-93	0.189755	0.12	0.02		STAT3	4.89081e-12	1.29137e-07	0.197112	0.57	0.448		GPAT3	2.70259e-36	7.13593e-32	0.528263	0.271	0.051		ZNF83	4.13928e-14	1.09294e-09	-0.320131	0.214	0.438		AC093912.1	1.25155e-13	3.3046e-09	0.796355	0.414	0.211
	FKBP5	8.28474e-128	2.1875e-123	-0.993963	0.302	0.57		PTBP3	7.14772e-16	1.88728e-11	0.290482	0.445	0.276		NPAS3	2.84785e-97	7.51945e-93	0.38902	0.388	0.196		PCED1B	6.70895e-12	1.77143e-07	0.10848	0.115	0.048		HUNK	3.50224e-36	9.24732e-32	-0.161777	0.007	0.097		PRKG1	4.97634e-14	1.31395e-09	0.537635	0.923	0.863		FHIT	1.3422e-13	3.54393e-09	0.445432	0.908	0.816
	CHST9	1.66778e-127	4.40362e-123	0.269186	0.163	0.009		ARHGAP29	7.24287e-16	1.91241e-11	0.383251	0.685	0.538		MAP3K1	6.1998e-97	1.63699e-92	0.38695	0.479	0.286		TFAP2B	7.88202e-12	2.08117e-07	-0.171491	0.226	0.342		AC068631.1	4.02256e-36	1.06212e-31	0.361161	0.379	0.126		PHLDB1	5.03004e-14	1.32813e-09	-0.200363	0.064	0.208		DDIT4	1.50782e-13	3.98125e-09	0.376645	0.288	0.098
	SLC22A5	4.87413e-127	1.28696e-122	-0.507558	0.231	0.512		SLC6A13	7.34866e-16	1.94034e-11	-0.222126	0.078	0.223		TACC1	4.14397e-96	1.09417e-91	-0.369667	0.235	0.444		PTH2R	8.3174e-12	2.19613e-07	-0.211306	0.711	0.806		CALCR	6.09476e-36	1.60926e-31	0.792519	0.219	0.019		PCAT1	7.861e-14	2.07562e-09	-0.33952	0.227	0.454		ARMC2	1.70843e-13	4.51094e-09	-0.203039	0.095	0.249
	SLC2A9	2.9389e-126	7.75988e-122	-0.67313	0.666	0.846		MLLT3	7.40038e-16	1.954e-11	0.283126	0.467	0.298		AC009879.4	7.31935e-96	1.9326e-91	-0.295447	0.076	0.256		ITPR1	8.42575e-12	2.22473e-07	-0.209223	0.313	0.429		OSBPL3	6.59926e-36	1.74247e-31	0.483575	0.611	0.372		DCDC1	1.10858e-13	2.92709e-09	-0.265212	0.134	0.325		RAPGEF5	1.80262e-13	4.75963e-09	-0.111804	0.006	0.071
	TNFAIP8	3.18702e-126	8.41501e-122	0.306014	0.185	0.018		KAZN	9.42268e-16	2.48796e-11	0.39909	0.618	0.44		RASD1	2.02756e-95	5.35356e-91	0.136482	0.104	0.014		PLEKHA1	9.91543e-12	2.61807e-07	0.241742	0.61	0.505		AC005699.1	7.66769e-36	2.02458e-31	-0.218425	0.03	0.157		MTCL1	1.34886e-13	3.56152e-09	-0.128132	0.019	0.108		PRKN	1.89135e-13	4.99393e-09	0.483715	0.729	0.614
	IL6R	3.22878e-126	8.52528e-122	-0.470194	0.163	0.437		LRCH1	1.20338e-15	3.1774e-11	0.307229	0.605	0.446		MIR4435-2HG	2.17242e-95	5.73606e-91	0.338653	0.33	0.153		LINC01091	9.99057e-12	2.63791e-07	-0.23332	0.163	0.264		CYTOR	1.15326e-35	3.04507e-31	-0.294773	0.084	0.258		ITGB8	1.62332e-13	4.28622e-09	-0.38036	0.172	0.371		ZNF608	1.93967e-13	5.1215e-09	-0.304946	0.211	0.409
	RTTN	8.16345e-126	2.15548e-121	-0.55895	0.179	0.449		AC004485.1	1.32145e-15	3.48915e-11	-0.305322	0.134	0.289		PRKN	3.48584e-95	9.20402e-91	-0.402174	0.589	0.756		AC068631.1	1.00042e-11	2.6415e-07	-0.130575	0.057	0.133		HMCN1	1.29905e-35	3.43002e-31	0.539318	0.523	0.275		MYRFL	1.66496e-13	4.39617e-09	-0.298025	0.215	0.433		AQP3	2.02378e-13	5.3436e-09	0.362032	0.268	0.083
	ASPA	1.01236e-125	2.67303e-121	-0.415806	0.193	0.475		ABCC2	1.33924e-15	3.53614e-11	-0.187209	0.059	0.198		OSMR-AS1	5.73236e-95	1.51357e-90	0.302868	0.323	0.149		VLDLR-AS1	1.00333e-11	2.64919e-07	0.149412	0.136	0.064		PARP14	1.36045e-35	3.59214e-31	-0.25159	0.072	0.238		ITPR3	2.539e-13	6.70398e-09	-0.155005	0.039	0.154		TMTC1	2.1476e-13	5.67053e-09	-0.226646	0.044	0.16
	ADAMTS16	4.05449e-125	1.07055e-120	0.369842	0.207	0.029		DCBLD2	1.46179e-15	3.85971e-11	0.36283	0.32	0.178		TMEM161B-AS1	4.92442e-94	1.30024e-89	-0.343304	0.313	0.529		CPQ	1.02444e-11	2.70494e-07	-0.184895	0.265	0.381		SPATS2L	1.36787e-35	3.61172e-31	-0.353608	0.153	0.358		STAT3	2.836e-13	7.48817e-09	-0.346847	0.28	0.508		SLC37A1	2.19122e-13	5.78571e-09	-0.18373	0.079	0.223
	ZHX3	7.2343e-125	1.91014e-120	-0.50354	0.32	0.602		AC087762.1	1.55587e-15	4.10813e-11	-0.358321	0.158	0.317		C12orf75	2.48646e-93	6.56526e-89	0.144278	0.108	0.016		GRM8	1.19877e-11	3.16524e-07	0.253066	0.266	0.167		DEPDC1B	2.34189e-35	6.18353e-31	0.440902	0.402	0.155		PRDM16-DT	3.32169e-13	8.77059e-09	0.390739	0.362	0.129		GLDC	2.27214e-13	5.99936e-09	0.356549	0.414	0.199
	TSPAN9	3.0055e-124	7.93572e-120	-0.458194	0.241	0.522		SLC27A2	1.56001e-15	4.11905e-11	-0.260953	0.09	0.235		TANC2	6.46336e-93	1.70659e-88	0.36022	0.672	0.492		ITPRID2	1.24814e-11	3.29559e-07	-0.165625	0.177	0.283		PDE10A	2.50735e-35	6.62041e-31	0.66636	0.713	0.468		SKIL	4.13256e-13	1.09116e-08	-0.236059	0.083	0.233		AC136475.3	3.02878e-13	7.9972e-09	-0.153035	0.04	0.151
	TENM3	4.40674e-124	1.16356e-119	0.431157	0.278	0.068		PTPRK	1.69424e-15	4.47348e-11	0.294107	0.84	0.73		MSR1	1.00848e-92	2.66278e-88	0.387915	0.364	0.18		HIVEP2	1.30418e-11	3.44356e-07	0.186486	0.349	0.239		NOS1	2.95222e-35	7.79503e-31	0.371432	0.275	0.057		PLCH1	4.34272e-13	1.14665e-08	-0.25009	0.07	0.212		DSE	3.68059e-13	9.71824e-09	-0.23375	0.116	0.279
	KCNQ1OT1	1.05897e-123	2.7961e-119	-0.634961	0.473	0.722		AC027288.3	1.73055e-15	4.56934e-11	-0.347822	0.127	0.28		STOX2	2.16603e-92	5.7192e-88	0.410908	0.498	0.308		SNHG14	1.30882e-11	3.4558e-07	-0.230391	0.672	0.748		AL136234.1	3.03851e-35	8.02288e-31	-0.120055	0.004	0.086		RHOBTB3	5.02927e-13	1.32793e-08	0.450621	0.648	0.429		MNS1	3.97155e-13	1.04865e-08	-0.276558	0.168	0.347
	EXT1	1.15752e-123	3.05631e-119	0.588706	0.609	0.356		MTCL1	1.78017e-15	4.70035e-11	0.255249	0.321	0.178		SLC9A3	3.37631e-92	8.9148e-88	-0.281121	0.155	0.36		PPFIBP1	1.54526e-11	4.08009e-07	0.216827	0.383	0.277		ITM2B	3.27214e-35	8.63976e-31	-0.366658	0.214	0.434		THSD7B	5.06077e-13	1.33624e-08	-0.188341	0.04	0.154		LRATD1	4.29085e-13	1.13295e-08	-0.143098	0.036	0.142
	ARNT2	2.15682e-123	5.69486e-119	0.270488	0.188	0.021		AC004053.1	1.87088e-15	4.93986e-11	-0.48982	0.158	0.317		TEX41	5.72787e-92	1.51239e-87	-0.358575	0.033	0.184		AC011751.1	1.58092e-11	4.17427e-07	0.168635	0.131	0.06		GRM8	5.49228e-35	1.45018e-30	-0.312513	0.016	0.12		NTN4	5.64279e-13	1.48992e-08	-0.36362	0.161	0.346		GNA13	5.11245e-13	1.34989e-08	0.349242	0.284	0.095
	APBB1IP	2.22782e-123	5.88233e-119	0.391852	0.231	0.041		TM7SF3	2.21703e-15	5.85386e-11	-0.285475	0.225	0.387		AL356737.2	7.94749e-92	2.09846e-87	-0.243851	0.039	0.196		KCNJ16	1.58766e-11	4.19206e-07	-0.178399	0.31	0.431		UNC13C	7.35551e-35	1.94215e-30	0.539283	0.283	0.064		TRPM6	6.07291e-13	1.60349e-08	0.583834	0.273	0.062		HSPA8	5.33124e-13	1.40766e-08	0.48802	0.199	0.036
	ROBO2	3.43225e-123	9.06252e-119	0.97858	0.191	0.024		ARHGEF3	2.24892e-15	5.93804e-11	0.266009	0.419	0.252		TMEM252-DT	2.07664e-91	5.48317e-87	0.14072	0.088	0.009		EXT1	1.83276e-11	4.83921e-07	0.223336	0.613	0.513		CCDC148	8.38576e-35	2.21418e-30	0.492059	0.595	0.358		LEPR	6.41024e-13	1.69256e-08	-0.260988	0.076	0.221		PLPP4	6.0549e-13	1.59874e-08	-0.26381	0.134	0.3
	PICALM	1.20714e-122	3.18734e-118	0.578361	0.752	0.568		LINC02220	2.37698e-15	6.27616e-11	-0.24098	0.026	0.142		CABP1	3.96456e-91	1.0468e-86	-0.271741	0.022	0.166		IFNAR2	1.99315e-11	5.26273e-07	0.152389	0.243	0.148		GDF15	1.23553e-34	3.2623e-30	-0.195739	0.023	0.137		LINC00623	6.65203e-13	1.7564e-08	-0.253727	0.127	0.304		RPS19	6.22792e-13	1.64442e-08	-0.191881	0.056	0.178
	AP003049.2	1.93532e-122	5.11002e-118	-0.550215	0.007	0.202		PRKD1	2.62179e-15	6.92258e-11	0.317371	0.654	0.498		RBBP8	4.70545e-91	1.24243e-86	0.379911	0.508	0.321		MERTK	2.01281e-11	5.31462e-07	-0.128253	0.099	0.189		NRK	2.56836e-34	6.78149e-30	0.39618	0.351	0.116		DISC1	6.99075e-13	1.84584e-08	-0.13441	0.017	0.1		EMX2	6.87774e-13	1.816e-08	-0.228907	0.104	0.258
	SGO1-AS1	3.15472e-122	8.32973e-118	-0.617014	0.285	0.564		RFTN1	3.63909e-15	9.60866e-11	0.228397	0.183	0.075		PHF21B	6.69247e-91	1.76708e-86	-0.278628	0.105	0.289		TRAF3	2.02169e-11	5.33808e-07	0.160602	0.269	0.17		UBE2H	3.31436e-34	8.75123e-30	-0.479981	0.505	0.711		NRG3	7.09362e-13	1.873e-08	-0.306359	0.019	0.104		ACTR3C	8.40948e-13	2.22044e-08	-0.266945	0.201	0.389
	LINC00871	1.55756e-121	4.11259e-117	-0.681835	0.377	0.66		RNF144B	4.20205e-15	1.10951e-10	0.301598	0.312	0.17		IFNAR2	1.85885e-90	4.9081e-86	0.20293	0.185	0.057		FBXL4	2.12427e-11	5.60891e-07	-0.180762	0.25	0.359		B4GALNT3	4.15344e-34	1.09667e-29	0.396133	0.351	0.117		RRAD	9.92659e-13	2.62102e-08	-0.12	0.02	0.108		FREM2	8.70526e-13	2.29854e-08	-0.239668	0.163	0.341
	LINC01277	2.16974e-121	5.72899e-117	-0.413788	0.094	0.346		ABCC4	4.86347e-15	1.28415e-10	0.272	0.7	0.53		CYTOR	3.84148e-90	1.01431e-85	0.316877	0.297	0.132		TMEM163	2.21752e-11	5.85514e-07	0.164125	0.201	0.114		ANXA2	4.28868e-34	1.13238e-29	-0.191677	0.028	0.148		PGGHG	1.04785e-12	2.76674e-08	-0.129941	0.019	0.104		RPS4X	1.07321e-12	2.8337e-08	-0.121943	0.019	0.104
	PNPLA3	1.20179e-120	3.1732e-116	-0.321394	0.034	0.251		ALOX5	5.31766e-15	1.40407e-10	0.128558	0.126	0.04		IL4R	5.39914e-90	1.42559e-85	0.11457	0.081	0.007		RBMS1	2.56357e-11	6.76885e-07	0.21884	0.625	0.516		CGNL1	4.8414e-34	1.27832e-29	0.45754	0.659	0.421		TMEM52B	1.13459e-12	2.99578e-08	0.448317	0.377	0.15		PAX8-AS1	1.12593e-12	2.97289e-08	-0.335706	0.474	0.665
	TTC38	1.53873e-120	4.06286e-116	-0.390918	0.199	0.481		FRMD5	5.44946e-15	1.43888e-10	0.342176	0.313	0.173		ZNF98	8.38271e-90	2.21337e-85	-0.361916	0.142	0.331		TMEM213	2.62562e-11	6.93268e-07	-0.153786	0.137	0.236		KLHL29	5.10658e-34	1.34834e-29	-0.153302	0.009	0.099		LINC01788	1.34904e-12	3.56202e-08	0.393109	0.262	0.054		AC096576.6	1.18838e-12	3.13779e-08	-0.108504	0.016	0.095
	FER1L6	1.29242e-118	3.41249e-114	-0.43909	0.014	0.212		EFCAB13	6.66877e-15	1.76082e-10	0.289998	0.413	0.255		NRK	1.04113e-89	2.749e-85	-0.354987	0.281	0.491		MEST	2.9821e-11	7.87393e-07	-0.124954	0.037	0.103		RBBP8	5.71214e-34	1.50823e-29	-0.501534	0.323	0.536		TMEM72	1.65725e-12	4.37579e-08	0.335427	0.332	0.108		NR1D1	1.26534e-12	3.34101e-08	0.285573	0.161	0.015
	VIM	1.9524e-118	5.15511e-114	0.218907	0.16	0.011		RAP1B	6.98398e-15	1.84405e-10	0.226849	0.387	0.232		NLGN4Y	1.29561e-89	3.42094e-85	0.481505	0.365	0.194		CPAMD8	3.13617e-11	8.28073e-07	0.10636	0.103	0.042		CLASP1	5.84437e-34	1.54315e-29	0.444985	0.804	0.635		ACOXL	1.8965e-12	5.00753e-08	-0.116415	0.012	0.083		KLHL8	1.34327e-12	3.54676e-08	-0.27265	0.115	0.27
	ABCC2	7.40188e-118	1.95439e-113	-0.379946	0.166	0.439		TENM4	7.64116e-15	2.01757e-10	0.251685	0.325	0.181		RAP1GAP	1.88079e-89	4.96604e-85	-0.292401	0.146	0.34		APP	3.40072e-11	8.97925e-07	0.210491	0.763	0.675		AL445123.2	6.6287e-34	1.75024e-29	-0.258223	0.084	0.253		PARP8	2.05336e-12	5.42168e-08	-0.259083	0.086	0.233		TRIM56	1.38059e-12	3.64532e-08	-0.181371	0.069	0.199
	SLC7A8	2.27675e-117	6.01152e-113	-0.589495	0.119	0.378		IQGAP2	8.35602e-15	2.20632e-10	-0.22846	0.116	0.267		PAPPA2	2.76897e-89	7.31118e-85	0.877873	0.316	0.153		TXNIP	3.7302e-11	9.84922e-07	-0.163181	0.222	0.333		TSC22D1	8.62059e-34	2.27618e-29	0.530179	0.768	0.619		MLLT3	2.14171e-12	5.65497e-08	-0.448495	0.516	0.725		CHST9	1.58176e-12	4.17648e-08	-0.218731	0.049	0.163
	SIPA1L3	2.96732e-116	7.83492e-112	-0.563774	0.388	0.636		PLEKHA5	8.97533e-15	2.36985e-10	-0.456367	0.811	0.83		RGS7	5.5049e-89	1.45351e-84	-0.277417	0.026	0.17		PANTR1	4.411e-11	1.16468e-06	-0.206611	0.291	0.398		AOAH	8.77389e-34	2.31666e-29	-0.169606	0.005	0.086		ITGA3	2.25185e-12	5.94579e-08	-0.227136	0.083	0.229		MFHAS1	1.76697e-12	4.66552e-08	-0.394991	0.268	0.451
	SPAG17	5.7027e-116	1.50574e-111	0.276913	0.205	0.032		ZBTB16	9.46356e-15	2.49876e-10	-0.558459	0.266	0.414		MPPED2	8.59193e-89	2.26861e-84	-0.335838	0.163	0.359		AC092153.1	4.81481e-11	1.2713e-06	0.107891	0.145	0.072		EHF	9.50975e-34	2.51095e-29	-0.134572	0.005	0.086		ANXA3	2.2661e-12	5.98341e-08	-0.133506	0.02	0.104		FYN	1.76929e-12	4.67165e-08	-0.112208	0.01	0.08
	HNF1A-AS1	6.45874e-116	1.70537e-111	-0.495499	0.441	0.705		TGFB2	1.03136e-14	2.72321e-10	0.235323	0.147	0.054		SESTD1	1.12794e-88	2.97822e-84	0.32909	0.449	0.26		NRXN3	4.83664e-11	1.27707e-06	0.173944	0.151	0.078		SOX9	1.54042e-33	4.06732e-29	-0.113446	0.004	0.079		RBPMS	2.33315e-12	6.16045e-08	-0.445736	0.694	0.85		CACNA2D2	1.78855e-12	4.72249e-08	-0.124561	0.021	0.107
	SFXN2	1.65272e-115	4.36384e-111	-0.329936	0.061	0.289		HRH1	1.10319e-14	2.91287e-10	0.178142	0.147	0.053		ZNF385D	1.5478e-88	4.08681e-84	-0.364099	0.102	0.279		KLHL29	5.36706e-11	1.41712e-06	0.103374	0.126	0.058		VCAN	2.81414e-33	7.43047e-29	-0.166713	0.004	0.081		AC092691.1	2.47932e-12	6.5464e-08	0.553986	0.223	0.029		RBMS3	2.16304e-12	5.71128e-08	-0.198799	0.059	0.181
	BAIAP2	1.72205e-115	4.54689e-111	-0.361946	0.075	0.31		2002-03-01	1.15905e-14	3.06035e-10	-0.256277	0.147	0.298		AKAP6	5.28998e-88	1.39677e-83	-0.305	0.174	0.371		ACTR3	5.41173e-11	1.42891e-06	0.163591	0.349	0.243		PAX8-AS1	4.02021e-33	1.0615e-28	-0.304638	0.141	0.334		SLC3A1	2.51269e-12	6.63451e-08	-0.268852	0.141	0.317		KLF10	2.17358e-12	5.73912e-08	0.31219	0.188	0.033
	SPAG5	2.79327e-115	7.37535e-111	-0.294805	0.024	0.226		CASC15	1.2194e-14	3.21969e-10	0.395036	0.491	0.331		COLEC10	6.60136e-87	1.74302e-82	0.179444	0.139	0.033		AC012409.2	6.13624e-11	1.62021e-06	-0.167976	0.258	0.368		LINC01828	4.16967e-33	1.10096e-28	0.529369	0.223	0.029		EPB41L2	2.72734e-12	7.20128e-08	-0.149688	0.04	0.15		SGCD	2.20403e-12	5.81953e-08	0.523823	0.207	0.045
	GLYATL1	2.94272e-115	7.76997e-111	-0.43458	0.139	0.397		PLEKHA7	1.37863e-14	3.64012e-10	-0.318874	0.605	0.719		CSGALNACT1	1.2588e-86	3.32372e-82	0.482643	0.411	0.237		KNG1	6.69943e-11	1.76892e-06	-0.112607	0.026	0.085		RNF150	5.08111e-33	1.34162e-28	0.422261	0.601	0.354		FNDC3B	3.37227e-12	8.90413e-08	-0.504734	0.688	0.838		SLC25A25	2.44544e-12	6.45693e-08	0.316027	0.234	0.065
	PC	5.83092e-115	1.5396e-110	-0.325488	0.045	0.263		ALDOB	1.5915e-14	4.20221e-10	-0.257234	0.024	0.134		HUNK	1.58483e-86	4.18459e-82	0.180656	0.148	0.038		CLIC4	6.79586e-11	1.79438e-06	0.211574	0.268	0.174		EYA3	6.21273e-33	1.64041e-28	-0.46641	0.355	0.564		AKAP13	3.37957e-12	8.92342e-08	-0.3201	0.305	0.529		KIRREL1	2.65663e-12	7.01457e-08	-0.129921	0.025	0.116
	ADAMTS9-AS2	8.05229e-115	2.12613e-110	0.634421	0.553	0.3		CORO1C	1.69993e-14	4.4885e-10	0.20605	0.308	0.169		TRAF3	1.6827e-86	4.44301e-82	0.218674	0.208	0.072		ZNF385B	7.19825e-11	1.90063e-06	-0.159022	0.128	0.22		LMO4	1.06905e-32	2.82271e-28	-0.110974	0.004	0.079		CD2AP	3.5603e-12	9.40062e-08	-0.421172	0.579	0.746		LCORL	2.72186e-12	7.18681e-08	-0.404644	0.342	0.534
	GPR155	8.74167e-115	2.30815e-110	-0.436432	0.144	0.398		RHOBTB1	1.87814e-14	4.95903e-10	-0.522748	0.494	0.613		RAP2C	2.95304e-86	7.7972e-82	-0.243013	0.057	0.217		AC011586.1	9.31567e-11	2.45971e-06	-0.106487	0.06	0.134		RASAL1	1.0798e-32	2.85111e-28	-0.109135	0.004	0.079		CIITA	3.76923e-12	9.95227e-08	-0.157819	0.033	0.133		HS6ST1	3.31062e-12	8.74136e-08	-0.293037	0.249	0.445
	SLC30A8	4.12259e-114	1.08853e-109	-0.658569	0.068	0.294		GPX3	2.06893e-14	5.4628e-10	-0.254362	0.085	0.22		PTGFR	3.51096e-86	9.27034e-82	0.166426	0.099	0.015		SGMS1	1.04573e-10	2.76114e-06	0.192088	0.607	0.494		SESTD1	1.6266e-32	4.29487e-28	-0.346183	0.189	0.395		GPHN	4.07053e-12	1.07478e-07	0.478596	0.864	0.804		LINC01320	3.32261e-12	8.77302e-08	-0.555071	0.416	0.608
	HPN	6.41941e-114	1.69498e-109	-0.428729	0.389	0.653		SETBP1	2.52194e-14	6.65892e-10	-0.286939	0.346	0.508		TRIO	2.0373e-85	5.37929e-81	0.393213	0.653	0.491		AL139383.1	1.09116e-10	2.88111e-06	-0.177737	0.204	0.306		DNAH5	2.46173e-32	6.49996e-28	-0.115916	0.003	0.075		BLNK	4.37745e-12	1.15582e-07	-0.338446	0.344	0.567		SLC20A1	3.4848e-12	9.20126e-08	0.581398	0.18	0.03
	LINC01510	8.80552e-114	2.32501e-109	-0.325898	0.049	0.268		CORO2B	2.69469e-14	7.11506e-10	0.100022	0.08	0.018		CIT	2.15048e-85	5.67813e-81	0.304433	0.348	0.178		EPB41L2	1.13503e-10	2.99693e-06	0.124784	0.142	0.072		MMP7	2.46175e-32	6.5e-28	-0.119578	0.003	0.075		TSPAN5	4.45344e-12	1.17589e-07	-0.269788	0.135	0.312		TRDMT1	3.49504e-12	9.22829e-08	-0.172966	0.062	0.184
	ZYG11A	9.67903e-114	2.55565e-109	-0.34328	0.063	0.288		FKBP5	2.77448e-14	7.32573e-10	-0.709345	0.192	0.336		PDE8B	2.5963e-85	6.85528e-81	-0.275997	0.075	0.241		PSD3	1.24992e-10	3.30028e-06	0.196874	0.31	0.209		PACRG	3.10101e-32	8.18792e-28	-0.312331	0.136	0.329		B4GALNT3	5.3759e-12	1.41945e-07	0.489193	0.421	0.2		SMARCD3	3.8689e-12	1.02154e-07	-0.151561	0.061	0.184
	HIBCH	1.22005e-113	3.22141e-109	-0.440837	0.366	0.623		ACSM3	2.92752e-14	7.72984e-10	0.572409	0.395	0.248		MID1	4.44916e-85	1.17475e-80	0.265075	0.19	0.063		CNTN1	1.41617e-10	3.73926e-06	-0.179856	0.087	0.167		AC019080.1	4.81266e-32	1.27073e-27	0.603447	0.536	0.285		FAT3	6.20785e-12	1.63912e-07	-0.130949	0.009	0.071		APBB2	4.1977e-12	1.10836e-07	-0.36559	0.471	0.656
	TLE1	2.24105e-113	5.91727e-109	0.253218	0.154	0.011		CCDC50	3.40073e-14	8.9793e-10	0.20875	0.318	0.178		FER	6.12232e-85	1.61654e-80	0.342643	0.545	0.358		AL078604.4	1.44673e-10	3.81995e-06	0.122566	0.131	0.064		HDAC9	5.62644e-32	1.48561e-27	-0.219335	0.021	0.126		PRKD1	6.47199e-12	1.70886e-07	-0.334772	0.327	0.55		SAT1	4.23784e-12	1.11896e-07	0.877974	0.429	0.264
	EPHX2	1.26114e-112	3.32992e-108	-0.402097	0.225	0.493		PAX8-AS1	3.47594e-14	9.17788e-10	0.298317	0.532	0.38		TCF7L1	6.81103e-85	1.79838e-80	0.137032	0.096	0.014		SLC19A3	1.47373e-10	3.89122e-06	0.102368	0.108	0.047		LRRK2	5.86448e-32	1.54846e-27	-0.477204	0.122	0.301		TMPRSS2	6.705e-12	1.77039e-07	0.457242	0.49	0.275		CSGALNACT1	4.53029e-12	1.19618e-07	0.446536	0.245	0.077
	BNIP3L	5.30311e-112	1.40023e-107	-0.466149	0.218	0.476		AL391117.1	3.75982e-14	9.92743e-10	-0.380484	0.336	0.491		MIR31HG	1.71234e-84	4.52125e-80	0.231922	0.155	0.042		SULF2	1.53474e-10	4.05232e-06	0.127565	0.17	0.094		TOM1L2	6.98479e-32	1.84426e-27	0.379916	0.518	0.283		SAMD12	6.74725e-12	1.78154e-07	-0.419888	0.599	0.758		CYTOR	5.01918e-12	1.32526e-07	-0.200232	0.141	0.306
	LSAMP	7.80335e-112	2.0604e-107	0.558897	0.19	0.028		GRAMD1B	3.76631e-14	9.94457e-10	-0.212316	0.008	0.104		PRAG1	2.63386e-84	6.95445e-80	0.166278	0.121	0.025		SHISA9	1.67385e-10	4.41962e-06	0.17093	0.153	0.08		KIRREL1	7.4757e-32	1.97388e-27	-0.229297	0.061	0.207		PARP4	7.24901e-12	1.91403e-07	-0.235114	0.116	0.279		MYRFL	5.66439e-12	1.49563e-07	-0.225053	0.088	0.226
	PLSCR1	2.14079e-111	5.65254e-107	0.26734	0.196	0.03		MED13L	3.80322e-14	1.0042e-09	0.234324	0.749	0.596		SUSD4	3.03171e-84	8.00494e-80	-0.298063	0.248	0.454		PTPRJ	1.75151e-10	4.62468e-06	0.244467	0.464	0.366		AC092078.2	8.41216e-32	2.22115e-27	0.400677	0.176	0.004		CASP10	7.40502e-12	1.95522e-07	-0.142109	0.033	0.133		RPS21	5.73434e-12	1.5141e-07	-0.221254	0.046	0.154
	ACY1	2.22136e-111	5.86527e-107	-0.353996	0.09	0.324		C11orf80	4.48928e-14	1.18535e-09	0.208143	0.279	0.148		STXBP4	9.00292e-84	2.37713e-79	-0.345234	0.298	0.496		MAL	2.15378e-10	5.68684e-06	-0.205467	0.321	0.431		SLC12A2	1.01423e-31	2.67797e-27	0.428468	0.372	0.146		SLC16A10	7.88051e-12	2.08077e-07	0.388565	0.341	0.125		PGGHG	5.93744e-12	1.56772e-07	-0.198095	0.122	0.279
	STK39	2.91063e-111	7.68523e-107	0.239605	0.16	0.014		MAST4	4.60423e-14	1.2157e-09	-0.344037	0.675	0.766		AC068234.2	1.00508e-83	2.6538e-79	0.124671	0.085	0.01		SGIP1	2.25968e-10	5.96646e-06	0.2406	0.478	0.374		KITLG	1.28799e-31	3.40082e-27	-0.587477	0.465	0.671		CEMIP2	8.54335e-12	2.25579e-07	-0.332015	0.149	0.321		MIR34AHG	6.42405e-12	1.69621e-07	-0.134941	0.023	0.11
	VCAN	3.87287e-111	1.02259e-106	0.36044	0.134	0.005		ZNF385B	5.05952e-14	1.33592e-09	-0.353331	0.333	0.495		GRM1	1.07899e-83	2.84895e-79	-0.227221	0.031	0.173		FXYD2	2.83937e-10	7.49707e-06	-0.187345	0.377	0.486		NNMT	1.42976e-31	3.77514e-27	-0.104935	0.002	0.068		SH3BP2	1.01358e-11	2.67625e-07	-0.131645	0.026	0.117		BICD1	6.47077e-12	1.70854e-07	-0.4049	0.549	0.727
	SLC22A12	6.3161e-111	1.6677e-106	-0.318206	0.047	0.26		SLC47A2	5.53591e-14	1.4617e-09	-0.342345	0.225	0.373		ME3	1.23317e-83	3.25606e-79	-0.281676	0.168	0.358		MALT1	3.40272e-10	8.98455e-06	0.199369	0.178	0.103		FYB1	2.29787e-31	6.0673e-27	-0.148486	0.009	0.093		LIMA1	1.0928e-11	2.88544e-07	-0.230771	0.158	0.342		SOX4	6.97932e-12	1.84282e-07	-0.16409	0.032	0.128
	MAML2	1.63903e-110	4.32771e-106	0.604363	0.853	0.708		ALDH1A2	5.79947e-14	1.53129e-09	0.150605	0.168	0.068		PDE1A	3.72146e-83	9.82613e-79	-0.362839	0.767	0.911		NHS	3.80459e-10	1.00456e-05	0.256656	0.689	0.615		NOX4	3.66843e-31	9.68613e-27	-0.137797	0.014	0.108		AVIL	1.1409e-11	3.01243e-07	-0.175197	0.046	0.158		ETV6	8.86885e-12	2.34173e-07	-0.377663	0.312	0.499
	FRY	2.68559e-110	7.09103e-106	0.259565	0.179	0.023		PPP4R1	5.8418e-14	1.54247e-09	0.176019	0.295	0.159		VPS13C	5.37793e-83	1.41999e-78	0.304907	0.501	0.314		GABRB2	3.94744e-10	1.04228e-05	-0.152952	0.067	0.139		ARHGAP26	4.60561e-31	1.21606e-26	-0.215022	0.041	0.169		HKDC1	1.19807e-11	3.16338e-07	-0.165347	0.034	0.133		CCND2	1.26157e-11	3.33106e-07	-0.130072	0.027	0.116
	KIAA1549	4.23386e-110	1.11791e-105	-0.437549	0.286	0.545		AC026803.3	6.59975e-14	1.7426e-09	-0.152885	0.013	0.111		AC005062.1	1.18342e-82	3.1247e-78	0.173001	0.144	0.037		NRCAM	4.31331e-10	1.13889e-05	-0.15319	0.171	0.268		AMY2B	4.82625e-31	1.27432e-26	0.354229	0.321	0.105		KCP	1.2703e-11	3.3541e-07	-0.209401	0.098	0.25		PHACTR1	1.27941e-11	3.37814e-07	-0.288078	0.246	0.427
	MLLT3	6.92798e-110	1.82926e-105	0.428987	0.337	0.118		XKR4	6.95399e-14	1.83613e-09	0.21968	0.196	0.087		KCNK13	8.4673e-82	2.23571e-77	-0.228686	0.03	0.168		POU3F3	4.41114e-10	1.16472e-05	-0.13717	0.138	0.228		ZFP36L1	8.25153e-31	2.17873e-26	-0.298187	0.111	0.285		DANT2	1.37944e-11	3.64226e-07	0.390379	0.828	0.704		GATA3-AS1	1.37027e-11	3.61805e-07	-0.182671	0.093	0.231
	PXDN	1.04849e-109	2.76842e-105	0.220697	0.126	0.002		RASGRP1	7.6472e-14	2.01917e-09	0.168499	0.186	0.081		GLIS3	9.92387e-82	2.6203e-77	0.43513	0.781	0.676		STK32A	4.52261e-10	1.19415e-05	-0.119256	0.109	0.194		SAMD12-AS1	1.18628e-30	3.13225e-26	-0.219421	0.05	0.184		CACNB4	1.40313e-11	3.70483e-07	0.554291	0.497	0.296		LINC02568	1.38134e-11	3.64729e-07	-0.128237	0.019	0.098
	LINC01788	4.92856e-109	1.30134e-104	-0.449032	0.123	0.364		MAP1B	9.021e-14	2.38191e-09	0.172457	0.113	0.036		PRICKLE1	4.82783e-81	1.27474e-76	0.175954	0.087	0.011		RNF152	5.31471e-10	1.4033e-05	-0.136582	0.059	0.127		AC117386.2	1.50103e-30	3.96331e-26	0.38253	0.294	0.084		MVP	1.68833e-11	4.45788e-07	-0.170228	0.055	0.175		WNT9B	1.58242e-11	4.17822e-07	-0.180151	0.059	0.175
	PARP14	6.08901e-109	1.60774e-104	0.280539	0.23	0.049		DOK6	1.08217e-13	2.85736e-09	-0.307406	0.258	0.414		AC004870.2	5.48342e-81	1.44784e-76	0.195873	0.138	0.035		CTTNBP2NL	7.08157e-10	1.86982e-05	0.132626	0.221	0.136		USP24	1.60555e-30	4.23928e-26	0.435983	0.744	0.562		DYNC2H1	1.8103e-11	4.77991e-07	-0.375714	0.477	0.688		AC239809.3	1.63499e-11	4.31704e-07	-0.148432	0.047	0.154
	FBP1	7.73303e-109	2.04183e-104	-0.406707	0.099	0.331		ASS1	1.20121e-13	3.17166e-09	-0.237835	0.09	0.221		LINC00645	1.24647e-80	3.29118e-76	-0.272798	0.135	0.316		RAB11FIP1	7.11623e-10	1.87897e-05	0.170594	0.178	0.102		TOX	1.6832e-30	4.44433e-26	0.56039	0.48	0.256		ZBTB38	1.88732e-11	4.98328e-07	-0.27473	0.133	0.3		CDH20	1.79051e-11	4.72765e-07	-0.109338	0.019	0.098
	ACSM3	1.27148e-108	3.3572e-104	0.923376	0.282	0.088		USP31	1.22861e-13	3.24403e-09	0.208462	0.351	0.209		PDZD2	4.64677e-80	1.22693e-75	0.186907	0.171	0.053		CLDN10	7.7646e-10	2.05017e-05	-0.184831	0.34	0.447		ACOXL	2.25109e-30	5.94377e-26	-0.19057	0.03	0.144		APBB2	1.96974e-11	5.20091e-07	-0.384219	0.531	0.725		AL139002.1	1.90263e-11	5.0237e-07	-0.109111	0.007	0.065
	GPHN	2.15127e-108	5.68021e-104	-0.439695	0.787	0.918		C3	1.31159e-13	3.46313e-09	0.257681	0.179	0.079		SPATS2L	1.37654e-79	3.63461e-75	0.278179	0.285	0.131		UNC5C	8.4082e-10	2.2201e-05	-0.108885	0.014	0.059		SPOCK1	2.67762e-30	7.07e-26	0.462601	0.235	0.046		HS6ST1	1.98993e-11	5.25421e-07	-0.272652	0.139	0.304		ID3	1.91602e-11	5.05907e-07	0.394813	0.211	0.056
	AC007364.1	3.63294e-108	9.59242e-104	-0.499277	0.466	0.719		CCL20	1.44913e-13	3.82629e-09	0.106705	0.041	0.003		EZR	1.56856e-79	4.14161e-75	0.297684	0.299	0.144		GALNT2	8.46048e-10	2.2339e-05	0.143133	0.207	0.127		LAMB1	2.72082e-30	7.18405e-26	-0.383185	0.401	0.608		SGMS1	2.09053e-11	5.51983e-07	-0.383687	0.439	0.646		IQGAP2	2.16018e-11	5.70373e-07	0.330592	0.311	0.128
	DGKH	4.44469e-108	1.17358e-103	0.51125	0.557	0.314		ARHGAP26	1.7742e-13	4.6846e-09	0.264375	0.718	0.576		KRT7	1.93999e-79	5.12236e-75	0.146994	0.131	0.032		CDKL1	8.65119e-10	2.28426e-05	-0.160101	0.215	0.316		SMARCD3	2.87799e-30	7.59904e-26	-0.181656	0.039	0.163		TRAF3	2.53076e-11	6.68222e-07	-0.234248	0.106	0.258		SNX29	2.24741e-11	5.93407e-07	0.363314	0.655	0.496
	ABHD6	1.96718e-107	5.19414e-103	-0.392438	0.144	0.39		MIR100HG	1.79409e-13	4.73713e-09	-0.271284	0.23	0.386		VWA8	2.75523e-79	7.27492e-75	-0.337967	0.497	0.665		SPATS2L	9.39568e-10	2.48084e-05	0.157863	0.347	0.246		ZNF90	3.15751e-30	8.3371e-26	-0.102391	0.003	0.07		RELB	2.90651e-11	7.67434e-07	-0.128092	0.024	0.108		LHFPL3	2.44874e-11	6.46564e-07	-0.308523	0.127	0.276
	MITF	3.63391e-107	9.59498e-103	0.519075	0.43	0.2		PAM	1.82456e-13	4.81757e-09	0.282582	0.666	0.532		AC090709.1	3.45563e-79	9.12425e-75	-0.226526	0.031	0.167		NLGN4X	9.42334e-10	2.48814e-05	-0.137035	0.047	0.111		ZBTB7C	3.54993e-30	9.37324e-26	-0.147968	0.009	0.091		CLCNKB	2.92363e-11	7.71955e-07	0.298422	0.239	0.05		PKHD1	2.75271e-11	7.26825e-07	-0.27965	0.976	0.97
	FRMD4B	3.78728e-107	9.99993e-103	-0.506905	0.454	0.701		ITGB1	1.86932e-13	4.93575e-09	0.197184	0.282	0.152		TOM1L2	4.40754e-79	1.16377e-74	-0.289131	0.255	0.449		SBNO2	1.02744e-09	2.71286e-05	0.107141	0.156	0.085		FAM20C	5.9528e-30	1.57178e-25	-0.167668	0.023	0.126		RASSF4	3.02473e-11	7.98649e-07	-0.146929	0.045	0.154		ITM2B	2.75379e-11	7.2711e-07	-0.195538	0.176	0.35
	ADGRG6	4.10647e-107	1.08427e-102	0.328615	0.282	0.082		2001-12-01	1.92356e-13	5.07896e-09	0.180036	0.117	0.039		AC040174.1	4.64784e-79	1.22722e-74	-0.320339	0.157	0.336		CHN2	1.09396e-09	2.8885e-05	0.184965	0.289	0.197		PLEKHD1	7.81039e-30	2.06226e-25	0.268758	0.207	0.028		RBBP8	3.20092e-11	8.4517e-07	-0.324607	0.258	0.462		MIR31HG	2.8514e-11	7.52885e-07	-0.302635	0.212	0.383
	AC005699.1	5.26442e-107	1.39002e-102	0.442319	0.304	0.095		WDFY3	2.00283e-13	5.28828e-09	-0.298253	0.659	0.771		CALCRL	7.487e-79	1.97687e-74	0.108859	0.069	0.005		PDE1A	1.13132e-09	2.98714e-05	-0.261329	0.729	0.791		ZFPM2-AS1	7.92165e-30	2.09163e-25	-0.230981	0.02	0.119		PLCG2	3.21979e-11	8.50152e-07	-0.596493	0.376	0.55		KITLG	3.36303e-11	8.87974e-07	-0.462119	0.297	0.472
	SLC9A9	1.28928e-106	3.40422e-102	0.403842	0.158	0.016		PTPRJ	2.22405e-13	5.87238e-09	0.316548	0.653	0.514		ZFP36L1	1.02336e-78	2.70208e-74	0.275003	0.31	0.152		FOSL2	1.23611e-09	3.26383e-05	0.14687	0.182	0.108		SAMD12	8.29241e-30	2.18953e-25	-0.40147	0.501	0.684		CHRM3	3.4917e-11	9.21948e-07	0.458535	0.455	0.242		CADPS	3.63454e-11	9.59664e-07	-0.106842	0.01	0.074
	MYO1D	1.54273e-106	4.07342e-102	0.285263	0.234	0.053		MCU	2.22849e-13	5.88411e-09	0.240173	0.445	0.296		DST	1.41411e-78	3.73381e-74	0.384125	0.551	0.376		MYO1E	1.29724e-09	3.42524e-05	0.307105	0.486	0.402		PKHD1	8.95749e-30	2.36514e-25	-0.426975	0.973	0.986		SHISA5	3.92345e-11	1.03595e-06	-0.13601	0.029	0.121		GRAMD1A	3.96082e-11	1.04582e-06	-0.122628	0.03	0.119
	MIR31HG	3.96709e-106	1.04747e-101	0.269128	0.154	0.014		NPR3	2.57083e-13	6.78803e-09	-0.27749	0.178	0.326		PRKCA	2.45075e-78	6.47097e-74	0.341589	0.406	0.233		USP53	1.48449e-09	3.91966e-05	-0.203297	0.478	0.567		PRKCA	9.80456e-30	2.5888e-25	-0.434084	0.343	0.546		KCND2	4.34021e-11	1.14599e-06	-0.110891	0.005	0.054		CDKL1	4.72708e-11	1.24814e-06	0.316724	0.398	0.205
	CEP112	4.41811e-106	1.16656e-101	0.398186	0.417	0.182		TRPV4	2.69868e-13	7.12559e-09	-0.200101	0.073	0.199		A4GALT	9.99785e-78	2.63983e-73	0.112258	0.091	0.014		MALAT1	1.50315e-09	3.96891e-05	-0.129919	1	1		VMP1	1.35737e-29	3.584e-25	-0.368365	0.204	0.398		ANXA4	4.79145e-11	1.26514e-06	-0.283638	0.164	0.338		VWDE	4.96387e-11	1.31066e-06	-0.159575	0.047	0.151
	MAP3K13	1.85317e-105	4.8931e-101	-0.47712	0.524	0.739		STOX2	2.77684e-13	7.33197e-09	0.274897	0.76	0.606		S100A2	2.20948e-77	5.8339e-73	0.17016	0.108	0.022		CGNL1	1.58695e-09	4.19018e-05	-0.272874	0.538	0.611		ITPR3	1.525e-29	4.02661e-25	-0.156116	0.023	0.126		TRMT9B	4.84318e-11	1.27879e-06	-0.213515	0.138	0.308		AFAP1	5.20991e-11	1.37563e-06	-0.226532	0.086	0.214
	SFXN5	5.00698e-105	1.32204e-100	-0.375498	0.13	0.37		PSAT1	2.90363e-13	7.66674e-09	-0.157526	0.013	0.107		KCTD16	2.71451e-77	7.16738e-73	-0.359594	0.166	0.345		LINC02232	1.62086e-09	4.27973e-05	-0.103817	0.025	0.078		LRRIQ1	1.53748e-29	4.05956e-25	-0.233314	0.086	0.246		TNS3	4.97543e-11	1.31371e-06	-0.390276	0.296	0.479		UFL1-AS1	5.30517e-11	1.40078e-06	-0.171624	0.043	0.142
	SLC17A3	7.7417e-105	2.04412e-100	-0.499724	0.281	0.54		KRAS	3.06371e-13	8.08942e-09	0.143309	0.168	0.07		RETREG1	3.15176e-77	8.32192e-73	0.250469	0.203	0.076		MYO6	1.63654e-09	4.32111e-05	0.215899	0.688	0.615		MROH7	1.92755e-29	5.08951e-25	0.336333	0.374	0.153		ASAP1	5.03955e-11	1.33064e-06	-0.330162	0.3	0.496		EFEMP1	5.77046e-11	1.52363e-06	-0.112807	0.019	0.095
	ANTXR1	1.21824e-104	3.21663e-100	0.19319	0.126	0.004		IL4R	3.53321e-13	9.3291e-09	0.146561	0.173	0.074		SPTLC3	3.5708e-77	9.42835e-73	0.326925	0.421	0.248		LINC00645	1.80696e-09	4.77109e-05	-0.1252	0.089	0.165		MAST4	2.61156e-29	6.89557e-25	0.385813	0.748	0.544		PTGR1	5.37569e-11	1.4194e-06	0.445107	0.395	0.188		RPLP0	5.86104e-11	1.54755e-06	-0.146715	0.035	0.128
	SOX4	1.9999e-104	5.28053e-100	0.290501	0.18	0.027		HHLA2	3.57645e-13	9.44325e-09	0.263332	0.235	0.118		PRKAA2	4.22131e-77	1.1146e-72	-0.288179	0.244	0.435		MAML2	1.9057e-09	5.0318e-05	0.173609	0.842	0.759		PPFIBP1	4.35803e-29	1.15069e-24	-0.46877	0.294	0.488		PTCHD1-AS	5.50177e-11	1.45269e-06	-0.208703	0.044	0.15		ITGA3	6.52255e-11	1.72222e-06	-0.206577	0.084	0.211
	CYTOR	3.56028e-104	9.40056e-100	0.237655	0.144	0.011		IL32	3.64565e-13	9.62598e-09	0.16444	0.194	0.089		GHR	7.30009e-77	1.92752e-72	-0.283283	0.057	0.202		SH3BP4	1.92231e-09	5.07567e-05	0.130703	0.173	0.1		NCKAP5	4.52866e-29	1.19575e-24	0.342912	0.315	0.104		SLC35F5	5.93526e-11	1.56715e-06	-0.31668	0.259	0.446		HS3ST1	7.46418e-11	1.97084e-06	-0.125948	0.023	0.104
	ACAD11	3.64839e-104	9.63321e-100	-0.386461	0.236	0.492		TES	3.72657e-13	9.83964e-09	0.136058	0.155	0.062		PTBP3	8.332e-77	2.19998e-72	0.267373	0.293	0.141		FNIP2	1.96437e-09	5.18673e-05	0.205124	0.325	0.232		HDAC7	5.45234e-29	1.43963e-24	-0.184258	0.043	0.167		FMNL2	6.10186e-11	1.61114e-06	-0.376133	0.222	0.417		TTC28	7.48967e-11	1.97757e-06	-0.287344	0.256	0.436
	ZNF83	6.54007e-104	1.72684e-99	0.40095	0.465	0.227		MGAM	3.7787e-13	9.97728e-09	-0.156904	0.01	0.1		GAD1	8.52339e-77	2.25052e-72	-0.226442	0.044	0.183		NLGN4Y	1.98419e-09	5.23907e-05	0.244535	0.423	0.328		C3	8.76998e-29	2.31562e-24	-0.104935	0.002	0.062		TNFRSF10B	6.56116e-11	1.73241e-06	-0.171967	0.055	0.171		CYTH2	7.70772e-11	2.03515e-06	-0.110761	0.026	0.11
	ACSL1	7.14283e-104	1.88599e-99	-0.406777	0.153	0.398		MAPT	4.14643e-13	1.09482e-08	-0.218251	0.069	0.19		IDH2	9.60782e-77	2.53685e-72	-0.28073	0.184	0.367		BACE2	2.02606e-09	5.3496e-05	0.126141	0.313	0.215		PRSS23	8.83673e-29	2.33325e-24	0.338131	0.287	0.088		AC114812.2	6.59667e-11	1.74179e-06	-0.146823	0.048	0.158		LINC01811	7.86245e-11	2.076e-06	-0.12837	0.002	0.045
	TUSC3	9.58508e-104	2.53084e-99	0.275234	0.214	0.044		PCSK5	4.81887e-13	1.27238e-08	-0.273462	0.215	0.368		NRG3	1.27428e-76	3.3646e-72	0.480133	0.301	0.148		PTPRG	2.37023e-09	6.25835e-05	0.175936	0.894	0.85		SLC24A3	1.24791e-28	3.29499e-24	0.339518	0.334	0.122		B2M	7.00572e-11	1.84979e-06	-0.176115	0.055	0.171		CST3	8.5732e-11	2.26367e-06	-0.108923	0.021	0.098
	RASSF8-AS1	1.65856e-103	4.37926e-99	-0.334573	0.12	0.357		SLC5A2	4.87717e-13	1.28777e-08	-0.164794	0.038	0.147		U91319.1	8.2479e-76	2.17778e-71	-0.268919	0.09	0.25		ITGB8	2.58122e-09	6.81546e-05	0.37616	0.567	0.498		CD24	1.3561e-28	3.58065e-24	-0.260831	0.143	0.326		ERBB4	7.09011e-11	1.87207e-06	-0.48272	0.946	0.983		SPATA17	8.6911e-11	2.2948e-06	-0.209371	0.109	0.246
	SLC7A7	1.66066e-103	4.3848e-99	-0.474507	0.128	0.361		ARSB	5.28086e-13	1.39436e-08	-0.299824	0.175	0.318		TNC	1.99791e-75	5.27528e-71	0.132854	0.067	0.005		PTBP3	2.64679e-09	6.98858e-05	0.169042	0.352	0.255		AKAP13	2.04904e-28	5.4103e-24	-0.342573	0.26	0.463		CNTN3	7.57482e-11	2.00006e-06	-0.239869	0.07	0.196		RPL19	9.28836e-11	2.4525e-06	-0.114614	0.028	0.113
	PATJ	2.4007e-103	6.33881e-99	-0.386647	0.84	0.948		ZNF608	5.3124e-13	1.40269e-08	0.265515	0.493	0.347		FGF13	3.22591e-75	8.51768e-71	0.443518	0.524	0.338		SORBS1	2.67859e-09	7.07254e-05	0.126448	0.342	0.241		PLEKHA5	2.0492e-28	5.41071e-24	-0.409873	0.753	0.858		ZNF292	8.11516e-11	2.14273e-06	-0.290932	0.407	0.629		TFCP2L1	9.66729e-11	2.55255e-06	0.438271	0.576	0.395
	SLC6A19	3.6112e-103	9.53502e-99	-0.297762	0.059	0.269		IGFBP7	5.37393e-13	1.41893e-08	0.296649	0.599	0.454		C3	3.7563e-75	9.91813e-71	0.100881	0.054	0.002		NPAS3	2.81609e-09	7.4356e-05	0.165551	0.455	0.345		PAX2	2.61731e-28	6.91073e-24	-0.302715	0.169	0.355		SLC16A2	8.26264e-11	2.18167e-06	-0.126359	0.018	0.092		KHDRBS3	1.01197e-10	2.672e-06	-0.152581	0.025	0.107
	KCNH6	6.75085e-103	1.78249e-98	-0.298224	0.021	0.203		C11orf54	6.40828e-13	1.69204e-08	-0.254526	0.232	0.381		CA10	5.93045e-75	1.56588e-70	-0.336193	0.297	0.493		NBEA	2.94191e-09	7.76781e-05	0.19329	0.44	0.346		CLIC4	2.92716e-28	7.72888e-24	-0.164369	0.014	0.101		CLEC16A	8.84879e-11	2.33643e-06	-0.308482	0.303	0.5		HSP90AA1	1.07112e-10	2.82817e-06	1.09975	0.33	0.172
	LINC02336	7.02044e-103	1.85368e-98	-0.812322	0.066	0.275		RASA2	6.56306e-13	1.73291e-08	0.188319	0.31	0.174		GNG7	7.08901e-75	1.87178e-70	-0.272884	0.081	0.235		UBE2D2	2.98675e-09	7.88622e-05	0.175285	0.362	0.269		HOXB3	3.05321e-28	8.06169e-24	-0.307464	0.256	0.46		SLC37A1	9.00085e-11	2.37659e-06	-0.16849	0.056	0.171		CHSY1	1.08827e-10	2.87348e-06	-0.261866	0.115	0.255
	RAPGEF5	7.67226e-103	2.02578e-98	0.312332	0.158	0.017		IQGAP1	7.2869e-13	1.92403e-08	0.19522	0.292	0.164		LINC01197	1.0758e-74	2.84055e-70	-0.203235	0.015	0.133		CPT1A	3.03469e-09	8.01281e-05	-0.122874	0.114	0.194		AC016526.1	3.66515e-28	9.67747e-24	0.258852	0.207	0.033		ESRRG	9.07482e-11	2.39611e-06	0.37995	0.978	0.963		AC093535.1	1.10686e-10	2.92255e-06	-0.216555	0.15	0.309
	LAMC1	8.44215e-103	2.22906e-98	0.368182	0.311	0.106		LINC02027	7.37035e-13	1.94607e-08	-0.279888	0.272	0.423		THRB	1.44697e-74	3.82057e-70	-0.354552	0.43	0.607		MID1	3.20255e-09	8.45602e-05	0.205271	0.241	0.157		SLC2A13	3.72613e-28	9.83849e-24	-0.235295	0.081	0.231		HYDIN	9.23962e-11	2.43963e-06	-0.20708	0.116	0.271		MLLT3	1.11398e-10	2.94134e-06	-0.331828	0.428	0.623
	PLEKHA6	9.59253e-103	2.53281e-98	-0.44084	0.31	0.558		KALRN	7.56754e-13	1.99813e-08	0.231072	0.413	0.264		NNMT	1.65774e-74	4.3771e-70	0.140133	0.081	0.011		CPVL	3.54236e-09	9.35326e-05	0.151251	0.234	0.152		SRRM4	4.1866e-28	1.10543e-23	0.359908	0.164	0.008		SAMD12-AS1	1.05787e-10	2.7932e-06	-0.197796	0.065	0.188		DST	1.28724e-10	3.39882e-06	-0.257605	0.188	0.356
	GMDS	4.09608e-102	1.08153e-97	0.446471	0.45	0.218		LINC02061	7.7547e-13	2.04755e-08	-0.142232	0.01	0.098		NEDD4	2.24118e-74	5.91762e-70	0.121078	0.089	0.014		FRAS1	4.01365e-09	0.000105976	-0.226654	0.501	0.585		AC131944.1	4.44959e-28	1.17487e-23	-0.379369	0.097	0.253		FMN1	1.10642e-10	2.9214e-06	-0.370842	0.234	0.421		CLIC6	1.30594e-10	3.4482e-06	-0.116394	0.03	0.116
	AC124854.1	1.96706e-101	5.19382e-97	-0.364621	0.029	0.216		AC004870.3	1.01236e-12	2.67305e-08	-0.179525	0.003	0.085		MACROD2	2.26239e-74	5.9736e-70	0.409064	0.718	0.57		HIPK2	4.07162e-09	0.000107507	0.181168	0.519	0.418		AC005062.1	5.27768e-28	1.39352e-23	-0.160723	0.022	0.119		FAM20C	1.16303e-10	3.07086e-06	-0.209613	0.103	0.25		FAM155A	1.61134e-10	4.25457e-06	-0.426714	0.157	0.312
	LRP2	2.29129e-101	6.04991e-97	-0.464045	0.789	0.952		ADAM9	1.02209e-12	2.69873e-08	0.197416	0.266	0.145		AC096531.2	2.36712e-74	6.25013e-70	0.212607	0.15	0.045		SGK2	4.07309e-09	0.000107546	-0.133188	0.192	0.285		ACOT11	5.50498e-28	1.45354e-23	0.329828	0.435	0.214		AC113414.1	1.18432e-10	3.12709e-06	-0.214992	0.068	0.192		FBLIM1	1.66337e-10	4.39198e-06	-0.114357	0.036	0.128
	PFKP	2.07925e-100	5.49005e-96	0.216794	0.134	0.009		WTAP	1.25547e-12	3.31495e-08	0.213004	0.295	0.169		SULT1C2	4.22314e-74	1.11508e-69	-0.286587	0.312	0.497		CDK14	4.07387e-09	0.000107566	-0.196677	0.312	0.406		PON2	7.09092e-28	1.87229e-23	-0.218947	0.091	0.246		ULK4	1.18766e-10	3.13591e-06	-0.378587	0.38	0.579		CNTN3	1.67339e-10	4.41841e-06	-0.226557	0.155	0.309
	ENPEP	2.36283e-100	6.23882e-96	-0.482908	0.502	0.739		TMEM217	1.27331e-12	3.36204e-08	0.114532	0.1	0.031		DPYD	4.79136e-74	1.26511e-69	0.279078	0.372	0.205		MAN1C1	4.24664e-09	0.000112128	-0.151114	0.116	0.197		LINC01811	7.50455e-28	1.9815e-23	-0.143572	0.004	0.07		ARL17B	1.21249e-10	3.20147e-06	0.353906	0.472	0.254		MIR4435-2HG	1.82286e-10	4.81307e-06	-0.253614	0.181	0.341
	A1CF	6.83925e-100	1.80584e-95	-0.351674	0.124	0.356		RRAS2	1.51655e-12	4.00431e-08	0.295347	0.432	0.294		ACTN1	7.39803e-74	1.95337e-69	0.169384	0.153	0.047		KCTD1	4.33044e-09	0.000114341	-0.205868	0.51	0.596		FANK1	9.14122e-28	2.41365e-23	-0.190004	0.05	0.175		WDR72	1.21673e-10	3.21265e-06	0.414279	0.634	0.442		SRGAP1	1.85755e-10	4.90467e-06	-0.158313	0.048	0.148
	PKHD1	1.59884e-99	4.22158e-95	0.467084	0.981	0.98		EBNA1BP2	1.58233e-12	4.17797e-08	-0.214451	0.073	0.192		CNKSR3	8.8816e-74	2.3451e-69	0.365165	0.497	0.327		CRYAB	4.91866e-09	0.000129872	0.101027	0.08	0.032		ARAP2	1.09824e-27	2.89979e-23	-0.185304	0.057	0.191		LCORL	1.24249e-10	3.28066e-06	-0.355676	0.341	0.533		FAM20A	1.93098e-10	5.09856e-06	-0.34178	0.247	0.409
	FMNL2	2.35002e-99	6.205e-95	0.571233	0.571	0.341		FREM2	1.64493e-12	4.34326e-08	-0.24036	0.158	0.298		PDE10A	1.0158e-73	2.68212e-69	-0.441958	0.247	0.444		CDC42SE2	5.11859e-09	0.000135151	0.211767	0.408	0.316		TESC	1.23995e-27	3.27396e-23	-0.183193	0.045	0.167		KIRREL1	1.27002e-10	3.35336e-06	-0.116422	0.02	0.096		NHSL2	1.95022e-10	5.14936e-06	-0.117238	0.024	0.104
	UBE2D2	3.45722e-99	9.12843e-95	0.422237	0.545	0.306		S100A6	1.66956e-12	4.40831e-08	0.141386	0.144	0.057		KCNJ1	1.12554e-73	2.97187e-69	-0.276188	0.233	0.423		GLRX	5.80846e-09	0.000153367	-0.117476	0.103	0.18		PRKG1	1.59961e-27	4.22361e-23	-0.359247	0.22	0.434		SREBF2	1.45406e-10	3.83931e-06	0.391108	0.458	0.25		TNFSF10	2.0475e-10	5.40623e-06	-0.110151	0.019	0.092
	GGT1.1	3.70018e-99	9.76997e-95	-0.359199	0.1	0.321		CASK	2.22141e-12	5.8654e-08	0.26623	0.439	0.296		HSD11B2	1.34238e-73	3.54443e-69	-0.26312	0.11	0.273		IRX2	5.96113e-09	0.000157398	-0.127142	0.121	0.201		CLCNKB	1.76428e-27	4.6584e-23	0.309072	0.369	0.155		GRM8	1.48224e-10	3.9137e-06	-0.329824	0.067	0.188		AOAH	2.1627e-10	5.71038e-06	-0.12717	0.016	0.086
	RBPMS	1.02328e-98	2.70187e-94	0.519449	0.871	0.764		RBMS3-AS3	2.47753e-12	6.54168e-08	0.15474	0.227	0.114		MYO6	1.44981e-73	3.82807e-69	0.343617	0.643	0.492		LDHB	6.25471e-09	0.000165149	-0.130161	0.159	0.247		ARID5B	1.93377e-27	5.10593e-23	-0.417753	0.313	0.515		BACE2	1.51329e-10	3.9957e-06	-0.30789	0.212	0.396		RPS2	2.19997e-10	5.8088e-06	-0.134828	0.043	0.139
	NUGGC	1.08424e-98	2.86283e-94	-0.307438	0.04	0.231		PMEPA1	2.55382e-12	6.74311e-08	0.138749	0.14	0.055		ADAM10	1.54911e-73	4.09026e-69	0.340715	0.445	0.279		HULC	6.3009e-09	0.000166369	0.191894	0.357	0.262		TRAF3	2.11043e-27	5.57237e-23	-0.225537	0.072	0.213		FHOD3	1.57201e-10	4.15075e-06	0.432745	0.791	0.662		TRIM22	2.20861e-10	5.8316e-06	-0.117787	0.035	0.125
	PARP8	1.23287e-98	3.25528e-94	0.25753	0.19	0.034		EHHADH	2.73929e-12	7.23282e-08	-0.229745	0.166	0.307		SLC34A2	1.96868e-73	5.19809e-69	0.103096	0.064	0.005		RRAD	6.35212e-09	0.000167721	0.104529	0.076	0.03		MACROD2	2.50144e-27	6.60479e-23	-0.423787	0.527	0.71		CCDC191	1.73079e-10	4.56997e-06	-0.220036	0.134	0.296		MSN	2.45302e-10	6.47696e-06	0.440189	0.262	0.104
	TMEM106A	4.20166e-98	1.10941e-93	-0.317429	0.108	0.334		PHLDB2	2.74264e-12	7.24166e-08	0.280562	0.558	0.416		FAM171A1	2.20484e-73	5.82165e-69	-0.307866	0.332	0.519		XKR4	6.78753e-09	0.000179218	0.180826	0.202	0.125		LDLRAD4	2.52704e-27	6.6724e-23	-0.272515	0.057	0.186		AC024022.1	1.78063e-10	4.70158e-06	-0.159451	0.033	0.125		LAPTM4A	2.5688e-10	6.78267e-06	-0.134419	0.04	0.134
	NOVA1	6.17329e-98	1.63e-93	0.337542	0.317	0.112		AL358232.2	2.75974e-12	7.28681e-08	-0.223848	0.189	0.335		PLIN5	7.19515e-73	1.89981e-68	-0.232927	0.095	0.252		DAB2	6.97978e-09	0.000184294	0.117763	0.246	0.161		PLCE1	2.64801e-27	6.99181e-23	-0.128694	0.012	0.093		BNC2	1.7992e-10	4.7506e-06	-0.18444	0.065	0.188		ARHGAP6	3.02347e-10	7.98317e-06	-0.355842	0.465	0.629
	NTN4	7.28202e-98	1.92274e-93	0.65534	0.424	0.2		MEG8	2.86393e-12	7.56192e-08	-0.381465	0.067	0.184		LYPD6	1.26248e-72	3.33344e-68	-0.236964	0.037	0.167		ATP11A	7.59698e-09	0.000200591	0.191417	0.496	0.404		LINC01099	3.27747e-27	8.65382e-23	0.468413	0.199	0.032		AJAP1	1.80125e-10	4.75601e-06	-0.105622	0.017	0.088		RBBP8	3.4045e-10	8.98924e-06	-0.303396	0.241	0.409
	PDK4	1.36748e-97	3.61071e-93	-0.509946	0.09	0.305		SHTN1	3.2667e-12	8.62538e-08	0.23376	0.507	0.364		GAREM1	1.45626e-72	3.84511e-68	0.390579	0.439	0.281		SUSD4	8.60175e-09	0.000227121	-0.201227	0.197	0.281		APP	4.30396e-27	1.13642e-22	-0.392479	0.49	0.673		NCOA7	1.91407e-10	5.05392e-06	-0.218524	0.092	0.229		ZNF462	3.45825e-10	9.13116e-06	-0.146821	0.039	0.131
	ACACB	1.4387e-97	3.79874e-93	-0.38016	0.142	0.375		APBA1	3.69864e-12	9.7659e-08	0.265116	0.171	0.078		ACTB	1.94008e-72	5.12259e-68	0.200396	0.171	0.058		NCOA7	9.55738e-09	0.000252353	0.260021	0.466	0.384		SAMD4A	4.65455e-27	1.22899e-22	-0.304086	0.069	0.206		SAMD4A	2.06977e-10	5.46502e-06	-0.28111	0.117	0.267		UCP2	3.68862e-10	9.73943e-06	0.233958	0.155	0.027
	AIG1	2.443e-97	6.4505e-93	-0.416814	0.478	0.702		AK4	3.9822e-12	1.05146e-07	-0.269876	0.166	0.301		CPAMD8	2.98401e-72	7.87897e-68	0.101862	0.065	0.006		EGFR	9.84397e-09	0.00025992	0.140232	0.308	0.215		PAPPA	4.94148e-27	1.30475e-22	-0.191677	0.027	0.127		TRIM22	2.1208e-10	5.59975e-06	-0.103677	0.019	0.092		ARHGEF10L	3.70232e-10	9.77561e-06	0.397507	0.564	0.409
	LINC02275	7.77951e-97	2.0541e-92	-0.350951	0.098	0.316		SLC22A5	4.02586e-12	1.06299e-07	-0.215725	0.129	0.262		MYO1E	6.3121e-72	1.66665e-67	0.35163	0.434	0.269		AL031073.2	1.0668e-08	0.000281677	-0.138912	0.047	0.105		APBB2	6.26466e-27	1.65412e-22	0.426339	0.903	0.808		SORBS1	2.1713e-10	5.73311e-06	-0.136762	0.033	0.125		MTR	4.34922e-10	1.14837e-05	0.328196	0.678	0.507
	SLC22A11	1.22294e-96	3.22904e-92	-0.316292	0.101	0.321		ITGB3	4.26788e-12	1.12689e-07	0.243073	0.344	0.214		S100A6	1.03875e-71	2.74272e-67	0.29986	0.232	0.101		ARHGEF12	1.1967e-08	0.000315975	0.157325	0.55	0.457		PTAFR	6.35672e-27	1.67843e-22	-0.121082	0.008	0.081		TRNP1	2.36929e-10	6.25586e-06	-0.113728	0.028	0.112		AC093298.2	4.57242e-10	1.2073e-05	-0.103357	0.015	0.08
	FLNB	1.25119e-96	3.30364e-92	0.348716	0.337	0.127		GALM	4.31856e-12	1.14027e-07	-0.219007	0.134	0.265		RHPN2	1.17904e-71	3.11313e-67	0.201955	0.205	0.08		SASH1	1.22908e-08	0.000324526	0.219741	0.593	0.51		FYN	6.35916e-27	1.67907e-22	-0.119975	0.006	0.075		LINC01226	2.37452e-10	6.26969e-06	-0.220804	0.07	0.192		SLC2A1	4.90725e-10	1.29571e-05	0.321576	0.183	0.047
	UTRN	1.84165e-96	4.86271e-92	0.277305	0.196	0.038		LINC02471	4.85858e-12	1.28286e-07	0.234255	0.416	0.271		AC016526.1	1.34741e-71	3.55769e-67	-0.185489	0.027	0.149		CD2AP	1.32079e-08	0.000348741	0.212264	0.539	0.456		LRBA	9.83613e-27	2.59713e-22	0.31483	0.944	0.891		AC093912.1	2.45252e-10	6.47562e-06	0.661724	0.193	0.029		ALDH1A2	5.431e-10	1.434e-05	-0.235116	0.085	0.205
	RABGAP1L	2.50463e-96	6.61323e-92	-0.490784	0.64	0.792		FMO4	5.62805e-12	1.48603e-07	-0.181389	0.09	0.213		KLHL29	1.53091e-71	4.04222e-67	0.117121	0.084	0.013		PRRG1	1.37278e-08	0.000362469	0.181981	0.32	0.237		RANBP17	1.16449e-26	3.07473e-22	-0.210276	0.043	0.16		ATP6V1B1	2.48837e-10	6.57029e-06	0.27664	0.213	0.042		IL1RAPL1	5.73665e-10	1.51471e-05	-0.22372	0.03	0.113
	MIR4435-2HG	2.6012e-96	6.86822e-92	0.232595	0.148	0.016		AP003400.1	6.65032e-12	1.75595e-07	-0.200196	0.024	0.118		PGGHG	4.27657e-71	1.12919e-66	0.10011	0.074	0.009		MIR222HG	1.56777e-08	0.000413955	0.178871	0.173	0.104		PID1	1.20922e-26	3.19282e-22	0.38753	0.201	0.035		ITM2C	2.71986e-10	7.18152e-06	-0.130796	0.022	0.1		SYTL5	6.01457e-10	1.58809e-05	-0.132504	0.024	0.101
	WSB1	3.25299e-96	8.58919e-92	0.363303	0.359	0.145		SHISA9	7.08175e-12	1.86987e-07	0.286843	0.207	0.104		AL353151.2	5.43925e-71	1.43618e-66	-0.195688	0.04	0.171		SLC25A33	1.67833e-08	0.000443145	-0.136859	0.107	0.18		TMEM213	1.30655e-26	3.44981e-22	0.377297	0.519	0.304		ERO1A	2.73052e-10	7.20967e-06	-0.178942	0.062	0.179		SKIL	6.64939e-10	1.75571e-05	-0.182724	0.101	0.228
	KMO	3.70847e-96	9.79186e-92	-0.338932	0.055	0.252		PDE3A	7.61952e-12	2.01186e-07	-0.195548	0.042	0.145		SPATA6L	7.13576e-71	1.88413e-66	0.244367	0.308	0.156		ITM2B	1.89838e-08	0.00050125	-0.158216	0.252	0.341		CLCNKA	1.36778e-26	3.61149e-22	0.260898	0.263	0.075		LHFPL3-AS2	2.90034e-10	7.65806e-06	-0.275559	0.196	0.371		HOOK1	6.83512e-10	1.80475e-05	-0.223421	0.175	0.326
	CDH9	3.8232e-96	1.00948e-91	-0.532904	0.363	0.612		SYT16	7.64534e-12	2.01868e-07	0.103662	0.075	0.019		CDC42SE2	7.66731e-71	2.02448e-66	0.301973	0.351	0.195		TSC22D1	1.91158e-08	0.000504733	0.170115	0.5	0.394		PAPLN	1.41123e-26	3.72621e-22	-0.146912	0.029	0.131		PKHD1	3.10804e-10	8.20647e-06	-0.340472	0.97	0.996		HIF1A-AS3	7.43983e-10	1.96441e-05	-0.209332	0.158	0.309
	SSBP2	6.80354e-96	1.79641e-91	0.320981	0.225	0.056		SRGAP1	1.06763e-11	2.81897e-07	0.234871	0.432	0.295		DUSP9	8.80848e-71	2.32579e-66	-0.197081	0.055	0.193		ADGRF1	2.25901e-08	0.00059647	0.132399	0.331	0.239		IL7	1.41461e-26	3.73513e-22	-0.18854	0.038	0.151		LURAP1L	3.15143e-10	8.32104e-06	-0.119121	0.02	0.096		SLC7A1	8.08352e-10	2.13437e-05	0.362714	0.325	0.16
	CGNL1	7.88391e-96	2.08167e-91	-0.628606	0.37	0.589		GAB2	1.249e-11	3.29786e-07	0.239603	0.372	0.239		SCIN	1.23731e-70	3.26699e-66	0.285446	0.364	0.204		LARGE1	2.28259e-08	0.000602694	0.156231	0.371	0.281		LIPG	1.44093e-26	3.80463e-22	-0.181701	0.053	0.18		MAL	3.27497e-10	8.64723e-06	0.59117	0.504	0.308		IFNAR2	8.20657e-10	2.16686e-05	-0.238054	0.102	0.226
	KIRREL1	4.07991e-95	1.07726e-90	0.204236	0.128	0.008		FLNA	1.31122e-11	3.46216e-07	0.112777	0.122	0.046		WSB1	1.50847e-70	3.98297e-66	0.349519	0.692	0.553		MIR503HG	2.28495e-08	0.000603319	-0.114581	0.087	0.156		LURAP1L	1.6335e-26	4.31308e-22	-0.135348	0.011	0.087		SCNN1G	3.40683e-10	8.99541e-06	0.372078	0.464	0.25		CFAP54	8.57188e-10	2.26332e-05	-0.163875	0.074	0.187
	PRICKLE2	6.51112e-95	1.7192e-90	0.423854	0.52	0.293		SLC5A10	1.33603e-11	3.52766e-07	-0.169819	0.054	0.16		NUDT4	1.51397e-70	3.9975e-66	-0.288532	0.251	0.435		PLAU	2.29475e-08	0.000605905	0.15013	0.088	0.04		AC099788.1	1.84581e-26	4.87369e-22	-0.167341	0.031	0.135		ARPC1B	3.58398e-10	9.46315e-06	-0.101024	0.022	0.1		ACSL4	9.16016e-10	2.41865e-05	-0.321293	0.161	0.306
	TCL6	1.04706e-94	2.76465e-90	-0.232512	0.007	0.164		AC079298.3	1.38501e-11	3.65697e-07	0.234121	0.103	0.035		AC138123.1	4.65302e-70	1.22858e-65	-0.350454	0.229	0.406		GPC4	2.4163e-08	0.000638	0.169123	0.23	0.152		NNT	2.02672e-26	5.35136e-22	0.349303	0.531	0.316		TRPV6	3.81557e-10	1.00746e-05	-0.12002	0.026	0.108		AC022395.1	9.25468e-10	2.4436e-05	-0.154161	0.066	0.175
	PFKFB2	1.20639e-94	3.18535e-90	-0.319567	0.064	0.263		SLC15A2	1.38981e-11	3.66965e-07	-0.145031	0.034	0.131		GPM6B	4.74026e-70	1.25162e-65	0.148182	0.116	0.028		AKT3	2.44357e-08	0.000645199	0.122529	0.511	0.402		YAP1	3.36025e-26	8.87239e-22	-0.339651	0.4	0.599		LINC00970	3.90477e-10	1.03102e-05	0.412579	0.3	0.112		NCEH1	1.07981e-09	2.85112e-05	-0.194053	0.072	0.184
	POLD3	1.54758e-94	4.08623e-90	-0.287333	0.052	0.245		DENND5B	1.40118e-11	3.69968e-07	-0.241574	0.316	0.463		AC011751.1	4.88305e-70	1.28932e-65	0.150174	0.088	0.015		BIRC3	2.45353e-08	0.000647831	0.114031	0.082	0.036		EFEMP1	3.3875e-26	8.94435e-22	-0.260055	0.073	0.21		DACH1	3.91205e-10	1.03294e-05	-0.523984	0.685	0.817		ARID5B	1.09857e-09	2.90068e-05	-0.30119	0.227	0.383
	SUCLG1	1.91102e-94	5.04585e-90	-0.381644	0.163	0.397		NIBAN1	1.4794e-11	3.90622e-07	0.101225	0.06	0.013		MAP2	5.35726e-70	1.41453e-65	0.181491	0.122	0.031		ATP6V0A4	2.56136e-08	0.000676302	-0.172525	0.204	0.292		KCNN3	3.89919e-26	1.02954e-21	0.266445	0.246	0.065		ZNF486	4.02704e-10	1.0633e-05	-0.173844	0.08	0.208		AC013652.1	1.09996e-09	2.90434e-05	-0.158468	0.065	0.175
	VMP1	2.19355e-94	5.79186e-90	0.554132	0.609	0.413		STAT1	1.48176e-11	3.91245e-07	0.247613	0.269	0.154		DPH6-DT	1.2878e-69	3.4003e-65	-0.31129	0.182	0.352		GPC3	2.63374e-08	0.000695413	-0.130514	0.087	0.155		SEMA6A	6.02993e-26	1.59214e-21	-0.182578	0.04	0.152		LINC00534	4.96071e-10	1.30983e-05	-0.138387	0.03	0.117		ARRDC3-AS1	1.12807e-09	2.97856e-05	-0.155326	0.054	0.154
	CRYAB	2.66816e-94	7.04501e-90	0.421348	0.264	0.081		SMURF1	1.49279e-11	3.94155e-07	0.208643	0.427	0.284		SLC43A2	1.28871e-69	3.40271e-65	-0.263159	0.129	0.29		TSC22D2	2.66793e-08	0.00070444	-0.201435	0.299	0.381		SCN2A	7.04055e-26	1.85899e-21	-0.409572	0.61	0.778		ADAMTS9	4.98865e-10	1.3172e-05	-0.446258	0.387	0.558		NREP	1.16638e-09	3.0797e-05	-0.18491	0.076	0.19
	CLDN1	3.18469e-94	8.40886e-90	0.230004	0.112	0.003		ZFP36L1	1.70823e-11	4.51041e-07	0.238197	0.423	0.285		MACF1	1.94868e-69	5.14529e-65	0.289805	0.634	0.462		HDAC7	2.96279e-08	0.000782296	0.105801	0.223	0.145		CACNA1D	7.10616e-26	1.87631e-21	-0.489698	0.626	0.76		FAM171A1	5.46587e-10	1.44321e-05	0.359582	0.585	0.396		CD24	1.181e-09	3.11832e-05	-0.185278	0.166	0.32
	RTN4	3.95117e-94	1.04327e-89	0.343393	0.296	0.102		KLHL29	1.81324e-11	4.78769e-07	0.340973	0.426	0.294		AC002460.2	2.06888e-69	5.46267e-65	0.37617	0.426	0.259		CCDC198	2.97066e-08	0.000784373	0.162523	0.528	0.444		LINC00113	8.3239e-26	2.19784e-21	0.248562	0.158	0.011		CD47	5.51882e-10	1.45719e-05	-0.1527	0.075	0.2		COL26A1	1.18331e-09	3.12442e-05	-0.171829	0.058	0.16
	BACE2	7.02483e-94	1.85483e-89	0.197904	0.121	0.006		RAP1GAP2	1.86641e-11	4.92808e-07	0.202328	0.321	0.194		LINC00623	2.19929e-69	5.807e-65	0.211891	0.24	0.107		ATRNL1	3.12221e-08	0.000824389	0.105806	0.11	0.056		CFAP221	1.48449e-25	3.91965e-21	-0.306096	0.271	0.467		METAP2	5.53526e-10	1.46153e-05	-0.295178	0.202	0.371		LINC00511	1.24218e-09	3.27987e-05	-0.114488	0.009	0.062
	MEG3	8.30092e-94	2.19177e-89	0.352187	0.193	0.038		NF2	1.96804e-11	5.19642e-07	0.185849	0.22	0.116		DANT2	4.41471e-69	1.16566e-64	-0.327728	0.662	0.784		TMCO4	3.45812e-08	0.000913083	0.111991	0.263	0.178		P2RY6	2.46484e-25	6.50815e-21	-0.158482	0.029	0.128		MOB3B	6.25403e-10	1.65132e-05	-0.288694	0.22	0.396		FHAD1	1.35306e-09	3.57262e-05	-0.129464	0.039	0.128
	PHACTR2	1.49474e-93	3.94672e-89	0.361111	0.332	0.127		ABHD6	2.0061e-11	5.29689e-07	-0.161579	0.06	0.169		LYN	4.79006e-69	1.26477e-64	0.148051	0.136	0.039		LINC00970	3.85073e-08	0.00101675	-0.124697	0.056	0.114		KCNJ3	2.47803e-25	6.54298e-21	0.325802	0.323	0.123		AC019080.5	6.91342e-10	1.82542e-05	0.250382	0.168	0.017		PAM	1.40142e-09	3.70031e-05	-0.271279	0.276	0.442
	ZBTB16	3.64101e-93	9.61373e-89	-0.543209	0.38	0.622		ELF3	2.03865e-11	5.38285e-07	0.207844	0.313	0.185		AC097515.1	1.04829e-68	2.7679e-64	-0.222893	0.053	0.187		SORBS2	3.85975e-08	0.00101913	-0.150287	0.48	0.577		AC011447.3	3.09811e-25	8.18026e-21	-0.144731	0.031	0.133		NRCAM	7.24875e-10	1.91396e-05	0.4054	0.54	0.358		AUTS2	1.41957e-09	3.74822e-05	-0.193947	0.082	0.199
	LARP4	5.69069e-93	1.50257e-88	-0.350484	0.25	0.494		CDK6	2.07098e-11	5.46822e-07	0.253518	0.302	0.184		CDCP1	1.09626e-68	2.89456e-64	0.132812	0.12	0.031		VCAN	4.47484e-08	0.00118154	0.247962	0.194	0.125		SLC41A2	3.33716e-25	8.81144e-21	-0.1327	0.02	0.109		CASC15	7.32785e-10	1.93485e-05	-0.236789	0.054	0.162		SCNN1B	1.42663e-09	3.76687e-05	0.324882	0.386	0.217
	TPK1	1.02164e-92	2.69753e-88	0.387287	0.264	0.083		NEDD4	2.24566e-11	5.92944e-07	0.270141	0.502	0.362		ST5	1.22886e-68	3.24467e-64	0.285118	0.283	0.141		ZFHX3	4.56494e-08	0.00120533	0.147794	0.464	0.369		NEDD4L	3.38326e-25	8.93315e-21	0.343551	0.757	0.587		LINC00472	7.47331e-10	1.97325e-05	0.410904	0.862	0.804		NRCAM	1.50417e-09	3.97162e-05	0.327766	0.425	0.243
	AC008014.1	1.38549e-92	3.65825e-88	-0.457097	0.405	0.645		GK	2.31451e-11	6.11124e-07	-0.218296	0.119	0.245		ITPR1	2.18243e-68	5.76249e-64	-0.309176	0.384	0.564		SEC14L1	4.66716e-08	0.00123232	-0.147848	0.193	0.277		KRT19	4.36262e-25	1.15191e-20	-0.144377	0.015	0.097		SLC38A11	7.56971e-10	1.99871e-05	0.472941	0.539	0.375		LINC01117	1.51752e-09	4.00687e-05	-0.247634	0.138	0.276
	SLC6A12	1.73292e-92	4.57559e-88	-0.324099	0.076	0.279		OGFRL1	2.5136e-11	6.6369e-07	0.138795	0.126	0.05		KATNAL2	2.2735e-68	6.00296e-64	-0.28154	0.187	0.357		SYTL4	5.07877e-08	0.001341	-0.119057	0.143	0.222		ST3GAL1	5.05909e-25	1.3358e-20	-0.122869	0.018	0.102		PTPRK	7.78431e-10	2.05537e-05	-0.323887	0.444	0.646		IL7	1.52238e-09	4.0197e-05	-0.17234	0.084	0.202
	LRCH1	1.86522e-92	4.92494e-88	0.408804	0.483	0.258		STRIP2	2.51542e-11	6.64171e-07	-0.161973	0.008	0.085		FGF14	3.19527e-68	8.4368e-64	-0.494548	0.141	0.299		GRB10	5.23838e-08	0.00138314	0.10335	0.167	0.1		LINC00623	5.23041e-25	1.38104e-20	-0.286575	0.197	0.377		GGT2	7.83566e-10	2.06893e-05	-0.158269	0.022	0.096		AC073569.2	1.52351e-09	4.02268e-05	-0.163329	0.053	0.151
	EIF4G3	2.12602e-92	5.61354e-88	0.399145	0.548	0.32		SLC16A12	2.76676e-11	7.30535e-07	-0.395466	0.367	0.491		LINC02432	7.0598e-68	1.86407e-63	-0.239284	0.072	0.212		NPNT	5.26603e-08	0.00139044	-0.164017	0.188	0.271		MAP2	6.31389e-25	1.66712e-20	-0.110406	0.003	0.058		LINC01138	8.51068e-10	2.24716e-05	-0.202393	0.15	0.312		TCF4	1.5643e-09	4.13038e-05	-0.223586	0.118	0.249
	2002-03-01	3.12087e-92	8.24034e-88	-0.417987	0.263	0.497		CXADR	2.86283e-11	7.55901e-07	0.140486	0.204	0.102		ZNF385B	1.71477e-67	4.52768e-63	-0.280696	0.184	0.354		PON2	5.31573e-08	0.00140357	0.142549	0.476	0.383		ACACB	7.60692e-25	2.00853e-20	0.31657	0.508	0.294		AC006230.1	8.6358e-10	2.2802e-05	-0.134984	0.037	0.129		FGFR3	1.65372e-09	4.36647e-05	-0.140223	0.055	0.154
	CARMIL1	6.39474e-92	1.68847e-87	0.387666	0.398	0.184		PRODH2	2.92665e-11	7.72753e-07	-0.133083	0.013	0.094		GOT1	2.35783e-67	6.22562e-63	-0.241497	0.17	0.342		KIRREL1	5.47753e-08	0.00144629	0.115226	0.264	0.181		HS3ST1	9.5218e-25	2.51414e-20	-0.143215	0.023	0.115		CYFIP2	8.67475e-10	2.29048e-05	0.375384	0.351	0.158		AC027288.3	1.75302e-09	4.62867e-05	-0.157811	0.062	0.166
	AOX1	7.52338e-92	1.98647e-87	-0.374305	0.137	0.361		AC099792.1	3.3558e-11	8.86064e-07	0.14581	0.148	0.064		AC022784.1	2.64576e-67	6.98587e-63	-0.185546	0.027	0.144		BMP6	5.61127e-08	0.0014816	0.141314	0.148	0.086		COL8A1	9.6592e-25	2.55042e-20	0.265187	0.155	0.012		PLSCR2	8.7326e-10	2.30575e-05	-0.199231	0.085	0.212		SAMD12-AS1	1.8419e-09	4.86336e-05	-0.176022	0.086	0.205
	SLIT2	8.085e-92	2.13476e-87	-0.531587	0.361	0.595		MAP3K1	3.62966e-11	9.58375e-07	0.237624	0.61	0.472		OSBPL3	3.82772e-67	1.01067e-62	-0.299664	0.523	0.688		CALCR	5.84745e-08	0.00154396	-0.216108	0.187	0.269		AC138305.1	1.0001e-24	2.64067e-20	0.490504	0.714	0.544		BBOX1	8.97733e-10	2.37037e-05	-0.170765	0.017	0.083		LINC02341	1.97858e-09	5.22424e-05	-0.120007	0.011	0.068
	CYFIP2	9.87066e-92	2.60625e-87	-0.382453	0.155	0.381		OSMR	4.01312e-11	1.05962e-06	0.209848	0.225	0.121		ITPR3	4.95036e-67	1.30709e-62	0.176446	0.19	0.073		PISD	5.90031e-08	0.00155792	0.128454	0.23	0.153		MAP2K6	1.85937e-24	4.90949e-20	0.356463	0.333	0.142		MAP3K5	9.37113e-10	2.47435e-05	-0.232198	0.141	0.296		ACSM3	2.14634e-09	5.66719e-05	-0.276538	0.116	0.243
	TGFBR3	1.01353e-91	2.67614e-87	-0.373719	0.175	0.404		OR2T11	4.13472e-11	1.09173e-06	-0.150876	0.034	0.128		CD24	2.12391e-66	5.60798e-62	0.245462	0.353	0.199		GTF2IRD1	5.98953e-08	0.00158148	0.148312	0.29	0.208		AL158071.3	2.35365e-24	6.21458e-20	0.325827	0.312	0.126		CHL1	1.00644e-09	2.65742e-05	-0.161962	0.033	0.121		NTN4	2.24478e-09	5.92711e-05	-0.372201	0.323	0.49
	PIGR	1.31146e-91	3.46279e-87	0.224824	0.158	0.023		FUT8	4.19219e-11	1.10691e-06	0.250734	0.423	0.291		INPP4B	2.33895e-66	6.17577e-62	-0.405136	0.36	0.523		CDH6	6.19798e-08	0.00163652	0.112212	0.054	0.019		SPATA17	3.7208e-24	9.82441e-20	-0.187687	0.06	0.184		TLN2	1.13893e-09	3.00723e-05	0.411835	0.557	0.371		EHF	2.27489e-09	6.00662e-05	-0.257706	0.241	0.401
	LINC02615	7.07814e-91	1.86891e-86	0.44763	0.436	0.22		LRRC49	4.23782e-11	1.11895e-06	0.185743	0.194	0.098		AL050309.1	7.02495e-66	1.85487e-61	0.316673	0.469	0.297		TMEM164	6.64498e-08	0.00175454	-0.134058	0.148	0.226		ARL17B	4.84059e-24	1.27811e-19	0.285304	0.469	0.257		OPHN1	1.37703e-09	3.63592e-05	0.38	0.532	0.354		EZR	2.33202e-09	6.15747e-05	0.456915	0.247	0.101
	ZFAT	1.49723e-90	3.9533e-86	-0.372438	0.184	0.411		DOP1B	4.2396e-11	1.11942e-06	0.129437	0.163	0.074		CD2AP	7.4751e-66	1.97373e-61	0.308029	0.488	0.325		LINC01965	6.68131e-08	0.00176413	-0.205078	0.129	0.2		RNF144B	7.44068e-24	1.96464e-19	-0.251807	0.079	0.211		EMX1	1.40985e-09	3.72257e-05	0.331515	0.382	0.192		LINGO2	2.38969e-09	6.30975e-05	-0.273008	0.037	0.122
	PVT1	1.85736e-90	4.90417e-86	0.271363	0.203	0.046		DUSP10	4.32972e-11	1.14322e-06	0.101714	0.085	0.026		TMEM207	7.5213e-66	1.98592e-61	-0.240267	0.015	0.12		SLCO4C1	6.79638e-08	0.00179452	-0.16401	0.221	0.305		PARP8	9.43999e-24	2.49254e-19	-0.215139	0.093	0.235		ZNF618	1.41144e-09	3.72677e-05	-0.251265	0.398	0.608		SPIRE1	2.50956e-09	6.62624e-05	0.369339	0.57	0.418
	HS3ST1	2.10661e-90	5.5623e-86	0.195315	0.114	0.005		CMTM7	4.34488e-11	1.14722e-06	0.189097	0.214	0.112		AC104596.1	9.52532e-66	2.51506e-61	-0.271308	0.118	0.272		DEFB1	6.91647e-08	0.00182622	-0.154368	0.112	0.184		GHR	9.98154e-24	2.63553e-19	0.309501	0.26	0.084		LHX1-DT	1.44034e-09	3.80309e-05	-0.255919	0.198	0.367		AKT3	2.52677e-09	6.67169e-05	0.321799	0.77	0.653
	ENAH	5.49489e-90	1.45087e-85	0.286616	0.248	0.073		CLIC4	4.38111e-11	1.15679e-06	0.226167	0.705	0.569		TMEM116	1.8952e-65	5.00408e-61	-0.238116	0.126	0.28		PLSCR1	7.38661e-08	0.00195036	0.157929	0.334	0.251		SKIL	1.0076e-23	2.66046e-19	-0.189531	0.053	0.17		AC105402.3	1.47894e-09	3.905e-05	-0.42927	0.094	0.225		CD81	2.57214e-09	6.79148e-05	-0.149123	0.061	0.163
	ALDH4A1	7.35893e-90	1.94305e-85	-0.31644	0.115	0.33		SBSPON	4.45933e-11	1.17744e-06	0.130153	0.183	0.088		PANK1	2.95058e-65	7.79071e-61	-0.189821	0.056	0.187		PLCL1	9.1617e-08	0.00241906	-0.262605	0.504	0.589		BLNK	1.1184e-23	2.95303e-19	-0.371712	0.369	0.54		LINC00271	1.48304e-09	3.91582e-05	-0.289803	0.232	0.408		PAWR	2.78028e-09	7.34105e-05	-0.213152	0.366	0.555
	AC092153.1	1.24491e-89	3.28706e-85	0.173844	0.11	0.004		COL12A1	4.89459e-11	1.29237e-06	0.160255	0.116	0.044		FGFR1	5.12268e-65	1.35259e-60	0.171187	0.165	0.059		VTCN1	1.03874e-07	0.0027427	0.152606	0.187	0.119		NRG3	1.25499e-23	3.31368e-19	-0.338961	0.052	0.166		RNF217-AS1	1.52906e-09	4.03732e-05	-0.127229	0.02	0.092		TTC39A	2.79674e-09	7.38452e-05	-0.110154	0.032	0.113
	FOCAD	1.33828e-89	3.53359e-85	0.339574	0.333	0.133		RBM47	5.11272e-11	1.34996e-06	-0.230095	0.502	0.63		HDAC7	8.41881e-65	2.2229e-60	0.158356	0.175	0.065		NT5C2	1.05848e-07	0.0027948	0.15169	0.411	0.323		DNAH6	2.34696e-23	6.19692e-19	-0.185744	0.062	0.185		SCNN1B	1.64061e-09	4.33188e-05	0.382119	0.328	0.146		MRPL33	2.86167e-09	7.55595e-05	-0.132863	0.054	0.151
	ARSF	2.1007e-89	5.54669e-85	-0.309089	0.037	0.213		PATJ	5.95441e-11	1.5722e-06	-0.260684	0.817	0.846		STAT3	1.56427e-64	4.1303e-60	0.2838	0.495	0.33		ARHGEF3	1.08391e-07	0.00286195	0.210746	0.591	0.505		TRIB2	6.83312e-23	1.80422e-18	-0.139382	0.028	0.12		COL4A1	1.74505e-09	4.60763e-05	-0.209436	0.165	0.333		GNAQ	2.9122e-09	7.68938e-05	-0.285211	0.559	0.727
	PTBP3	4.22985e-89	1.11685e-84	0.362053	0.315	0.121		TYMP	5.95793e-11	1.57313e-06	0.136045	0.157	0.07		LINC00271	1.99943e-64	5.27931e-60	0.302375	0.49	0.322		DIP2C	1.11964e-07	0.0029563	0.149284	0.489	0.392		LINC01182	7.18876e-23	1.89812e-18	0.379714	0.422	0.227		AC002070.1	1.86154e-09	4.91521e-05	-0.21858	0.059	0.167		FIGN	2.92353e-09	7.71929e-05	-0.136959	0.036	0.119
	AL078590.2	8.88505e-89	2.34601e-84	-0.326054	0.041	0.219		GNL3	6.28666e-11	1.65993e-06	0.109952	0.119	0.046		ITGA3	2.20516e-64	5.82251e-60	0.238385	0.254	0.122		SYT16	1.13151e-07	0.00298765	0.112378	0.227	0.151		RASD1	8.55572e-23	2.25905e-18	-0.1271	0.024	0.112		GABRB3	1.91623e-09	5.05962e-05	-0.234302	0.104	0.238		NRG3	2.95461e-09	7.80134e-05	-0.22372	0.019	0.086
	XKR4	9.36352e-89	2.47234e-84	0.237834	0.112	0.005		DAB2	6.61251e-11	1.74597e-06	-0.264191	0.458	0.585		TMEM178B	2.37281e-64	6.26517e-60	0.295664	0.251	0.119		DZIP1	1.32258e-07	0.00349213	-0.161109	0.299	0.384		PTH2R	1.02698e-22	2.71163e-18	0.421603	0.845	0.75		ZHX3	1.98973e-09	5.25369e-05	0.384896	0.425	0.242		AC023590.1	3.04023e-09	8.02742e-05	-0.207764	0.191	0.341
	INSR	1.19169e-88	3.14654e-84	-0.458829	0.579	0.767		PHYHIPL	6.74336e-11	1.78052e-06	-0.264337	0.237	0.369		PCSK5	2.50614e-64	6.6172e-60	0.13956	0.093	0.019		OSMR-AS1	1.32633e-07	0.00350204	0.146627	0.377	0.289		SRGAP1	1.03098e-22	2.72221e-18	-0.223051	0.084	0.215		IL6ST	2.15087e-09	5.67915e-05	-0.184364	0.094	0.225		OXR1	3.05603e-09	8.06914e-05	-0.347106	0.325	0.49
	DIP2C	1.63584e-88	4.31928e-84	-0.378389	0.622	0.807		PBX1	7.12946e-11	1.88246e-06	-0.257909	0.476	0.61		ACTR3	3.27352e-64	8.64341e-60	0.225762	0.284	0.144		ACACB	1.40822e-07	0.00371825	-0.111549	0.165	0.245		LINC01503	1.09837e-22	2.90013e-18	-0.158355	0.042	0.146		KNG1	2.23743e-09	5.90772e-05	0.276294	0.168	0.021		HSPB1	3.06984e-09	8.1056e-05	0.440482	0.257	0.113
	MAP4K4	2.4895e-88	6.57329e-84	0.346296	0.354	0.15		ESR1	7.44608e-11	1.96606e-06	-0.159146	0.06	0.165		MSN	4.24639e-64	1.12122e-59	0.194975	0.173	0.065		ADAMTS9	1.49185e-07	0.00393907	0.282279	0.416	0.337		GUCY1B1	1.1355e-22	2.99817e-18	-0.114141	0.013	0.084		GHR	2.44296e-09	6.4504e-05	0.313309	0.293	0.108		AL049828.1	3.10751e-09	8.20507e-05	-0.301586	0.229	0.38
	RBMS1	3.16463e-88	8.35588e-84	0.390252	0.445	0.227		CCN1	7.56782e-11	1.99821e-06	0.149206	0.131	0.053		TSPAN1	8.07442e-64	2.13197e-59	0.102039	0.083	0.015		SLCO3A1	1.50959e-07	0.00398593	0.176465	0.435	0.342		ADGRF1	1.30487e-22	3.44538e-18	-0.120211	0.012	0.083		HIF1A-AS3	2.45638e-09	6.48583e-05	-0.203995	0.088	0.212		BX890604.2	3.20714e-09	8.46812e-05	-0.144547	0.069	0.175
	AC104170.1	4.50162e-88	1.18861e-83	-0.293986	0.033	0.204		AGMAT	8.76748e-11	2.31497e-06	-0.112065	0.011	0.088		GPI	8.50157e-64	2.24476e-59	-0.24565	0.183	0.348		TPST1	1.5506e-07	0.00409421	0.198914	0.647	0.568		GPM6B	1.45069e-22	3.83039e-18	-0.12295	0.017	0.094		CMTM7	2.48713e-09	6.567e-05	-0.141928	0.041	0.133		CTSH	3.36871e-09	8.89475e-05	0.316211	0.345	0.187
	AC098617.1	7.59179e-88	2.00454e-83	0.232849	0.12	0.009		TNIK	1.04845e-10	2.76832e-06	0.277508	0.734	0.631		ADAMTS9-AS2	1.096e-63	2.89388e-59	0.350205	0.865	0.807		CCNH	1.55232e-07	0.00409873	-0.14639	0.312	0.404		CFTR	1.78474e-22	4.71243e-18	-0.190123	0.005	0.061		MYOF	2.98016e-09	7.86882e-05	-0.213334	0.131	0.279		PNP	3.37833e-09	8.92015e-05	0.346104	0.218	0.08
	SBSPON	1.4787e-87	3.90437e-83	0.158168	0.11	0.005		SLC6A19	1.0557e-10	2.78748e-06	-0.109588	0.005	0.075		LMO7	1.10138e-63	2.90808e-59	-0.391778	0.577	0.698		ACTN1	1.603e-07	0.00423256	0.127024	0.195	0.127		SWAP70	2.01881e-22	5.33046e-18	-0.174006	0.058	0.174		SOX4	3.20388e-09	8.45952e-05	-0.139433	0.031	0.112		LINC01762	3.5629e-09	9.40748e-05	-0.225502	0.123	0.252
	AC068234.2	1.51403e-87	3.99765e-83	0.167454	0.115	0.007		IL10RB	1.14216e-10	3.01577e-06	0.129356	0.145	0.064		EFCAB13	1.19413e-63	3.15298e-59	0.278915	0.299	0.158		SLC9A3	1.65998e-07	0.004383	-0.130258	0.113	0.182		ATP6V1B1	2.30983e-22	6.09887e-18	0.257537	0.336	0.148		UBA6-AS1	3.23688e-09	8.54666e-05	-0.357619	0.266	0.433		SPAG9	3.61463e-09	9.54408e-05	0.32517	0.445	0.273
	ETNK2	1.84369e-87	4.86808e-83	-0.254461	0.04	0.216		LINC01060	1.18973e-10	3.14136e-06	-0.272585	0.194	0.319		ERICH1	1.83179e-63	4.83665e-59	-0.272577	0.199	0.364		ITGB5	1.686e-07	0.00445172	-0.115595	0.159	0.237		MUC1	2.34389e-22	6.18881e-18	-0.199074	0.097	0.236		EFCAB13	3.39762e-09	8.97108e-05	-0.229881	0.115	0.254		MAP3K21	3.87909e-09	0.000102424	-0.35716	0.476	0.62
	COL4A1	3.81294e-87	1.00677e-82	0.449245	0.377	0.173		MAL	1.2085e-10	3.19091e-06	0.118388	0.135	0.056		LRRFIP1	1.93396e-63	5.10642e-59	0.278673	0.488	0.325		CREB5	1.69734e-07	0.00448167	0.2285	0.293	0.219		RASAL2	2.37387e-22	6.26796e-18	-0.268311	0.218	0.398		WDR78	3.57035e-09	9.42714e-05	-0.184364	0.09	0.217		SAMD5	4.27595e-09	0.000112902	-0.196029	0.121	0.249
	ARHGEF10	4.1903e-87	1.10641e-82	0.227564	0.184	0.038		AQP4-AS1	1.21362e-10	3.20444e-06	-0.207553	0.077	0.185		YAP1	2.99141e-63	7.89853e-59	0.279023	0.517	0.356		PFKP	1.90921e-07	0.00504109	0.128553	0.241	0.167		AC096576.6	3.2791e-22	8.65814e-18	-0.115446	0.023	0.106		PIK3IP1-AS1	3.72321e-09	9.83077e-05	-0.111012	0.025	0.1		RERG	4.35208e-09	0.000114912	-0.172069	0.058	0.157
	NKAIN4	6.15705e-87	1.62571e-82	0.280722	0.222	0.06		LINC01788	1.24129e-10	3.27751e-06	-0.169175	0.049	0.146		SAMD12-AS1	3.61254e-63	9.53855e-59	0.187033	0.189	0.075		AC053513.1	1.96153e-07	0.00517921	-0.108515	0.125	0.196		AK3	3.38339e-22	8.93349e-18	0.324072	0.577	0.387		GATA2-AS1	3.84452e-09	0.000101511	-0.11283	0.027	0.104		SIK3	4.48612e-09	0.000118452	0.328362	0.615	0.478
	IYD	6.54846e-87	1.72905e-82	-0.319821	0.106	0.313		SLC7A7	1.26114e-10	3.3299e-06	-0.168084	0.052	0.151		ENOX1	5.62645e-63	1.48561e-58	-0.571023	0.331	0.491		CPEB3	1.99884e-07	0.00527773	-0.158677	0.323	0.408		KSR2	4.25131e-22	1.12252e-17	0.34805	0.346	0.166		CASP4	4.12024e-09	0.000108791	-0.126128	0.044	0.138		FOXP2	4.68337e-09	0.00012366	-0.227948	0.048	0.139
	PPP2R2B	1.47749e-86	3.90116e-82	-0.611646	0.082	0.273		MB21D2	1.28596e-10	3.39546e-06	0.210236	0.32	0.198		IDH2-DT	6.09348e-63	1.60892e-58	-0.17335	0.032	0.146		VCL	2.03465e-07	0.00537229	0.182273	0.277	0.203		BICD1	4.63445e-22	1.22368e-17	-0.29645	0.25	0.428		CHPT1	4.16323e-09	0.000109926	0.35256	0.413	0.233		MAN1C1	4.76163e-09	0.000125726	0.385194	0.338	0.187
	PAWR	1.58804e-86	4.19306e-82	0.425043	0.466	0.252		ATP13A3	1.29502e-10	3.41937e-06	0.244662	0.382	0.26		RNF150	6.94521e-63	1.83381e-58	-0.358344	0.44	0.589		ABCC4	2.18021e-07	0.00575663	0.151758	0.304	0.226		HS6ST1	4.97521e-22	1.31365e-17	-0.194485	0.052	0.162		LRRIQ1	4.29426e-09	0.000113386	-0.216699	0.11	0.246		KSR2	4.95861e-09	0.000130927	0.335249	0.453	0.285
	ADAMTS9	2.19523e-86	5.7963e-82	0.50343	0.574	0.379		ITPR3	1.3021e-10	3.43807e-06	0.122663	0.145	0.064		SLC6A16	9.69305e-63	2.55935e-58	-0.184268	0.058	0.188		NFKB1	2.26729e-07	0.00598654	0.127352	0.258	0.181		COL4A6	5.56896e-22	1.47043e-17	0.28483	0.208	0.054		CDC42SE2	4.31068e-09	0.000113819	-0.297988	0.165	0.312		RAB11FIP2	5.04601e-09	0.000133235	-0.270492	0.224	0.374
	GOLGA4	2.44176e-86	6.44721e-82	-0.412598	0.626	0.812		SESTD1	1.3482e-10	3.55979e-06	0.210785	0.439	0.301		FBXO21	1.09307e-62	2.88614e-58	-0.216544	0.109	0.256		ANO6	2.31294e-07	0.0061071	0.136872	0.288	0.209		PIP5K1B	5.9729e-22	1.57709e-17	0.315504	0.406	0.215		SEMA4B	4.39683e-09	0.000116094	-0.165063	0.09	0.217		ARL17B	5.27396e-09	0.000139254	0.323742	0.465	0.306
	LINC02220	2.93274e-86	7.74361e-82	-0.420026	0.115	0.325		PVT1	1.37042e-10	3.61846e-06	0.201465	0.294	0.176		LINC02484	1.20319e-62	3.17689e-58	-0.190111	0.009	0.105		TBL1XR1	2.40095e-07	0.00633947	0.158479	0.573	0.486		ZFHX3	7.03847e-22	1.85844e-17	-0.248522	0.179	0.347		IL7	4.6003e-09	0.000121466	-0.189686	0.058	0.162		AC113414.1	5.34039e-09	0.000141008	-0.212432	0.068	0.169
	PAX8-AS1	4.34024e-86	1.146e-81	0.390484	0.415	0.206		ACACB	1.68794e-10	4.45685e-06	-0.163742	0.064	0.166		SEMA5A	1.55576e-62	4.10784e-58	0.152626	0.119	0.033		SLC16A12	2.67896e-07	0.00707353	-0.189389	0.249	0.332		TMEM63A	8.47212e-22	2.23698e-17	-0.176098	0.076	0.202		BTG2	4.63353e-09	0.000122344	0.283385	0.19	0.038		CMTM7	5.36171e-09	0.000141571	-0.104557	0.039	0.125
	SLC44A3	5.82434e-86	1.53786e-81	0.316687	0.338	0.139		NOTCH2	1.70801e-10	4.50984e-06	0.171216	0.325	0.201		PCCA-DT	2.43915e-62	6.44032e-58	-0.182997	0.05	0.174		TEAD1	2.68509e-07	0.00708971	0.154214	0.535	0.448		BCL2L1	1.17556e-21	3.10396e-17	0.286467	0.363	0.177		BTBD7	4.67561e-09	0.000123455	-0.256403	0.364	0.567		SLC41A2	5.90911e-09	0.000156024	-0.117968	0.036	0.119
	SLC43A2	6.03753e-86	1.59415e-81	-0.332323	0.092	0.291		AC016822.1	1.8267e-10	4.82323e-06	-0.132077	0.007	0.076		LIPG	3.6168e-62	9.54979e-58	0.137836	0.121	0.034		MTHFD1L	2.72187e-07	0.00718682	0.113355	0.299	0.216		COL4A2	1.42499e-21	3.76254e-17	-0.276552	0.135	0.283		FSTL4	4.70231e-09	0.00012416	0.35561	0.33	0.146		ZADH2	6.34027e-09	0.000167408	-0.103248	0.029	0.104
	NPAS3	1.02277e-85	2.70052e-81	0.3746	0.254	0.081		PDLIM5	1.87429e-10	4.94888e-06	0.191771	0.574	0.432		YPEL2	5.15844e-62	1.36204e-57	0.210036	0.234	0.108		ASAP1	2.73523e-07	0.0072221	0.124622	0.319	0.234		RANBP3L	1.80032e-21	4.75357e-17	0.311959	0.283	0.112		INSIG1	4.88752e-09	0.00012905	0.453051	0.149	0.013		LRP1B	6.58283e-09	0.000173813	-0.397134	0.22	0.371
	SHMT1	1.10343e-85	2.91351e-81	-0.337806	0.252	0.484		SULT1C4	1.92601e-10	5.08542e-06	0.224723	0.351	0.226		MIR29B2CHG	5.97838e-62	1.57853e-57	-0.234633	0.207	0.374		LINC01762	2.77295e-07	0.00732168	-0.18505	0.289	0.376		SNHG14	1.85946e-21	4.90971e-17	0.320986	0.869	0.778		GPRC5A	4.93592e-09	0.000130328	-0.123691	0.012	0.067		FAT3	6.63807e-09	0.000175272	-0.143619	0.015	0.074
	DENND5B	1.8717e-85	4.94204e-81	-0.394425	0.429	0.647		AC017101.1	2.0202e-10	5.33414e-06	0.147549	0.189	0.096		LARGE2	8.25195e-62	2.17885e-57	-0.165877	0.032	0.145		PTCHD1-AS	2.92172e-07	0.0077145	0.109636	0.081	0.039		COL27A1	2.03155e-21	5.36409e-17	-0.204919	0.105	0.244		TBL1XR1	5.0901e-09	0.000134399	-0.312817	0.373	0.567		LINC02751	6.68006e-09	0.00017638	-0.143778	0.05	0.142
	KHK	1.95198e-85	5.154e-81	-0.251206	0.054	0.235		MEF2A	2.14717e-10	5.66939e-06	0.24692	0.564	0.43		GCNT1	9.75783e-62	2.57646e-57	0.12078	0.103	0.025		CXCL14	3.21634e-07	0.00849242	-0.116557	0.099	0.164		MOB3B	2.16383e-21	5.71338e-17	-0.246242	0.135	0.285		AC096576.6	5.18721e-09	0.000136963	-0.116432	0.033	0.117		CNTNAP3	6.74521e-09	0.0001781	-0.131581	0.032	0.11
	FOXP1	2.04503e-85	5.3997e-81	0.411806	0.556	0.334		SERPINE2	2.31232e-10	6.10545e-06	0.279904	0.225	0.126		KCNN3	1.12474e-61	2.96976e-57	-0.194133	0.044	0.164		FREM1	3.3249e-07	0.00877906	-0.162461	0.165	0.238		LINC01098	2.99561e-21	7.90962e-17	0.287963	0.152	0.021		ID2	5.21785e-09	0.000137772	0.700386	0.259	0.096		ABCC4	6.97627e-09	0.000184201	-0.101581	0.024	0.095
	RGL1	2.49229e-85	6.58064e-81	-0.356787	0.309	0.542		GLYATL1	2.50329e-10	6.6097e-06	-0.159357	0.062	0.163		RAP2C-AS1	1.39168e-61	3.6746e-57	-0.304732	0.218	0.381		MAP3K1	3.50111e-07	0.00924433	0.189027	0.528	0.448		CD2AP	3.92226e-21	1.03563e-16	-0.314989	0.436	0.605		PLEKHA1	5.48596e-09	0.000144851	-0.237679	0.207	0.375		SLCO3A1	7.19853e-09	0.00019007	-0.26871	0.326	0.493
	KCNQ3	2.71215e-85	7.16116e-81	0.508308	0.228	0.067		MAGI2	2.53751e-10	6.70004e-06	-0.29208	0.445	0.568		NFYC	2.7529e-61	7.26876e-57	-0.246126	0.198	0.359		FP671120.4	3.58338e-07	0.00946155	0.124134	0.149	0.09		COL4A5	3.95901e-21	1.04534e-16	0.371833	0.56	0.383		AOPEP	5.65641e-09	0.000149352	-0.288815	0.496	0.683		TBL1X	8.15293e-09	0.00021527	0.272939	0.399	0.237
	NBPF15	2.89244e-85	7.63719e-81	0.200961	0.169	0.031		ALDH3A2	2.54589e-10	6.72218e-06	-0.179465	0.111	0.225		SEMA6A	1.00388e-60	2.65064e-56	0.137783	0.109	0.029		EIF4G3	3.64513e-07	0.0096246	0.165486	0.623	0.549		SLC37A1	4.17969e-21	1.1036e-16	-0.115302	0.025	0.109		LHFPL3	6.06933e-09	0.000160255	-0.316388	0.239	0.408		PPP1R42	8.38138e-09	0.000221302	-0.109757	0.04	0.125
	NPL	3.20434e-85	8.46075e-81	-0.385461	0.199	0.425		FER	2.60883e-10	6.88836e-06	0.204471	0.532	0.392		RRAGD	1.09267e-60	2.88509e-56	-0.182199	0.06	0.187		CRYBG1	3.75993e-07	0.00992773	-0.144418	0.162	0.234		PLXNB1	4.73546e-21	1.25035e-16	-0.222831	0.179	0.344		FGD4	6.251e-09	0.000165051	0.32026	0.741	0.613		CFAP43	8.69389e-09	0.000229553	-0.15861	0.092	0.208
	TJP1	4.1273e-85	1.08977e-80	0.360367	0.386	0.181		TANC2	2.62034e-10	6.91874e-06	0.2057	0.281	0.169		CLDN4	1.41887e-60	3.74639e-56	0.131218	0.117	0.033		ROCK2	3.82041e-07	0.0100874	0.120505	0.343	0.261		CNOT6L	5.45089e-21	1.43925e-16	0.363065	0.47	0.29		PTGER3	6.32957e-09	0.000167126	0.449577	0.542	0.358		COL4A2	9.02413e-09	0.000238273	-0.172897	0.194	0.347
	HDAC9	1.74917e-84	4.61852e-80	0.238204	0.124	0.011		DOCK8	2.6574e-10	7.0166e-06	-0.273146	0.303	0.427		DNAJC11	1.44602e-60	3.81806e-56	-0.243454	0.17	0.327		WDFY2	3.86793e-07	0.0102129	-0.148212	0.226	0.307		AC093895.1	5.7307e-21	1.51313e-16	0.282462	0.169	0.032		DUSP1	6.3419e-09	0.000167452	0.33724	0.246	0.083		TNFAIP8	9.18618e-09	0.000242552	-0.122966	0.034	0.113
	ANXA3	3.29224e-84	8.69282e-80	0.152826	0.098	0.002		CYP4F3	2.6602e-10	7.024e-06	-0.119137	0.015	0.09		AC105384.1	1.5619e-60	4.12405e-56	-0.149242	0.01	0.104		LAMC1	4.23814e-07	0.0111904	0.126953	0.347	0.261		BMPR1B	6.8239e-21	1.80178e-16	-0.201867	0.057	0.167		AHR	6.67416e-09	0.000176224	-0.131487	0.036	0.121		MRTFA	9.57132e-09	0.000252721	0.313222	0.459	0.303
	HUNK	5.56838e-84	1.47027e-79	0.241011	0.174	0.035		CTTN	2.76806e-10	7.30878e-06	0.1614	0.347	0.222		TFPI	1.68578e-60	4.45114e-56	0.272192	0.299	0.162		FARP1	4.41675e-07	0.011662	0.166855	0.754	0.687		MEF2A	7.26299e-21	1.91772e-16	0.327108	0.641	0.472		GADD45B	7.20119e-09	0.00019014	0.353077	0.238	0.075		RPL31	9.97664e-09	0.000263423	-0.146436	0.081	0.19
	MLXIPL	1.18114e-83	3.11868e-79	-0.347048	0.185	0.405		HSD17B14	3.0741e-10	8.11685e-06	-0.11982	0.026	0.109		PLEKHG1	3.68102e-60	9.71936e-56	0.25244	0.339	0.193		ESRRB	4.56181e-07	0.012045	-0.154595	0.194	0.271		LLGL2	7.74991e-21	2.04629e-16	-0.317177	0.432	0.61		SLC16A7	7.29571e-09	0.000192636	0.475731	0.415	0.233		MYLK	1.00664e-08	0.000265794	-0.102578	0.019	0.083
	ACTN1	2.19674e-83	5.80027e-79	0.225994	0.162	0.029		CAPN2	3.50773e-10	9.2618e-06	0.13603	0.165	0.079		CRYL1	5.78796e-60	1.52825e-55	-0.237254	0.18	0.338		SCHLAP1	4.80248e-07	0.0126805	-0.223785	0.342	0.416		COLEC10	8.39235e-21	2.21592e-16	-0.113787	0.017	0.09		ABCA4	7.3001e-09	0.000192752	-0.104583	0.017	0.079		HDAC9	1.02738e-08	0.000271269	-0.12901	0.023	0.092
	ALDH1L1	2.36988e-83	6.25744e-79	-0.376878	0.216	0.438		AKT3	3.56813e-10	9.4213e-06	0.264554	0.573	0.436		RANBP17	7.915e-60	2.08988e-55	0.235668	0.206	0.09		SMAD3	4.81682e-07	0.0127183	0.177409	0.271	0.199		TBC1D16	1.00392e-20	2.65074e-16	-0.177282	0.071	0.191		GALNT10	7.34034e-09	0.000193814	-0.154406	0.069	0.179		AC023051.1	1.03713e-08	0.000273845	-0.12193	0.039	0.122
	KLHL13	2.68419e-83	7.08733e-79	0.42426	0.308	0.123		PGM2L1	3.65109e-10	9.64034e-06	0.103011	0.116	0.046		STUM	2.34723e-59	6.19762e-55	-0.152136	0.016	0.115		KCTD8	5.35029e-07	0.0141269	0.141663	0.193	0.127		STON2	1.24054e-20	3.27551e-16	-0.21866	0.129	0.275		MIDN	7.66921e-09	0.000202498	-0.128779	0.04	0.129		NAALADL2	1.04871e-08	0.000276902	-0.309457	0.804	0.875
	ZBTB20	3.11787e-83	8.23243e-79	0.419814	0.977	0.966		PRKN	3.74275e-10	9.88236e-06	-0.271165	0.561	0.674		BBOX1-AS1	3.02366e-59	7.98367e-55	0.219842	0.19	0.079		SLC3A1	5.49137e-07	0.0144994	0.105501	0.279	0.199		TNRC6A	1.39281e-20	3.67758e-16	0.309637	0.697	0.541		MSMO1	9.00058e-09	0.000237651	0.324158	0.179	0.033		IRAK1BP1	1.06183e-08	0.000280365	-0.186208	0.14	0.273
	PALLD	3.73636e-83	9.8655e-79	0.282533	0.27	0.093		MYO1D	3.91076e-10	1.0326e-05	0.174602	0.328	0.206		SLC6A6	3.31791e-59	8.7606e-55	0.105695	0.07	0.011		AIF1L	5.78506e-07	0.0152749	0.113542	0.272	0.197		SPAG17	1.43353e-20	3.7851e-16	-0.222483	0.142	0.293		PUM3	9.12109e-09	0.000240833	-0.243624	0.174	0.325		SLC25A33	1.21608e-08	0.000321094	0.227681	0.188	0.059
	SNX29	6.97435e-83	1.84151e-78	-0.399007	0.751	0.895		SOX9	3.97512e-10	1.04959e-05	0.122545	0.131	0.056		WWTR1	3.38734e-59	8.94392e-55	0.302775	0.366	0.223		AC097662.1	5.98712e-07	0.0158084	-0.113236	0.197	0.276		HIPK2	1.45522e-20	3.84236e-16	-0.327278	0.289	0.456		WDFY2	1.06858e-08	0.000282148	0.322544	0.451	0.267		NEDD4L	1.24903e-08	0.000329794	0.446718	0.683	0.596
	SLC38A1	7.91661e-83	2.0903e-78	0.173871	0.112	0.007		CRYL1	4.22792e-10	1.11634e-05	-0.20801	0.197	0.326		RORA	3.79636e-59	1.00239e-54	-0.301969	0.771	0.865		NEAT1	6.15331e-07	0.0162472	0.253306	0.958	0.943		PDLIM5	1.64525e-20	4.34412e-16	-0.263344	0.24	0.41		HOOK1	1.07059e-08	0.000282679	-0.238208	0.165	0.317		AC007656.2	1.2803e-08	0.00033805	-0.122288	0.027	0.098
	ARHGEF38	1.32084e-82	3.48754e-78	0.198212	0.118	0.01		LINC01090	4.38438e-10	1.15765e-05	0.125321	0.145	0.066		C11orf80	4.18955e-59	1.10621e-54	0.200844	0.259	0.129		PGAP1	6.24834e-07	0.0164981	-0.112813	0.101	0.163		PTGER3	1.73972e-20	4.59357e-16	0.363425	0.688	0.485		GSTP1	1.11485e-08	0.000294365	-0.107379	0.024	0.096		COX6A1	1.29321e-08	0.000341459	-0.104245	0.025	0.095
	PLOD2	4.64152e-82	1.22555e-77	0.258028	0.179	0.039		SUSD1	4.3884e-10	1.15871e-05	0.134064	0.17	0.083		DIAPH3	5.69484e-59	1.50366e-54	0.243759	0.19	0.08		GUCY1A1	6.73924e-07	0.0177943	-0.137451	0.268	0.35		CCDC178	1.76909e-20	4.67111e-16	-0.351702	0.31	0.5		MYLK	1.1755e-08	0.000310379	-0.153231	0.035	0.117		KLHL29	1.31994e-08	0.000348516	-0.101354	0.021	0.086
	AC009053.3	4.71871e-82	1.24593e-77	-0.291978	0.111	0.314		OSBPL3	4.40394e-10	1.16282e-05	0.135396	0.114	0.046		NLGN4X	7.40074e-59	1.95409e-54	0.138326	0.086	0.018		CNTN4	6.8261e-07	0.0180236	0.149823	0.36	0.278		SOX4	2.26311e-20	5.97552e-16	-0.131069	0.032	0.122		KANSL1	1.1935e-08	0.000315133	0.349694	0.598	0.429		PCSK5	1.3203e-08	0.000348612	-0.156574	0.084	0.196
	HIF1A	9.45674e-82	2.49696e-77	0.419368	0.329	0.139		ETV6	4.54245e-10	1.19939e-05	0.253738	0.454	0.327		AC092153.1	1.65437e-58	4.3682e-54	0.122517	0.1	0.025		CPEB4	7.17571e-07	0.0189467	0.157375	0.488	0.403		PHACTR1	2.34151e-20	6.18253e-16	-0.188494	0.071	0.189		SHANK2	1.22707e-08	0.000323996	0.324824	0.554	0.371		GSN	1.32364e-08	0.000349493	-0.139329	0.079	0.187
	NFATC3	9.51827e-82	2.5132e-77	-0.335202	0.2	0.419		AGMO	4.81533e-10	1.27144e-05	-0.259803	0.323	0.451		CYB5A	2.69238e-58	7.10896e-54	-0.210911	0.108	0.247		EML1	7.3889e-07	0.0195096	0.128748	0.234	0.165		KCNQ1OT1	2.49804e-20	6.59582e-16	-0.468451	0.265	0.424		DTNA	1.28117e-08	0.000338281	-0.179835	0.033	0.112		SPNS2	1.36479e-08	0.000360358	-0.103559	0.141	0.282
	FAM49B	1.01269e-81	2.67391e-77	0.292805	0.27	0.095		ZFAT	4.87285e-10	1.28663e-05	-0.170778	0.1	0.209		MBOAT1	3.93885e-58	1.04001e-53	0.11001	0.089	0.02		CASTOR3	7.44168e-07	0.019649	0.108506	0.213	0.146		EPB41L4A	2.83159e-20	7.47652e-16	-0.291577	0.278	0.448		CA12	1.33527e-08	0.000352563	0.404932	0.677	0.542		SLC26A7	1.39094e-08	0.000367263	-0.329358	0.155	0.288
	PDE10A	1.36523e-81	3.60475e-77	-0.375333	0.231	0.463		SLC25A42	5.25618e-10	1.38784e-05	-0.14791	0.054	0.149		SPATC1	4.40956e-58	1.1643e-53	-0.160049	0.033	0.141		IGF1R	7.46267e-07	0.0197044	0.12231	0.691	0.605		RHCG	2.8646e-20	7.56369e-16	0.213185	0.172	0.036		AC007319.1	1.41711e-08	0.000374174	-0.252017	0.066	0.171		LINC00271	1.42689e-08	0.000376757	-0.251486	0.245	0.401
	ANKRD6	1.91403e-81	5.05381e-77	0.305302	0.301	0.116		A1CF	5.2568e-10	1.38801e-05	-0.148887	0.052	0.146		OPCML	4.61912e-58	1.21963e-53	-0.214633	0.014	0.108		NR3C2	8.53922e-07	0.022547	-0.13053	0.707	0.782		TENM4	2.94435e-20	7.77426e-16	-0.128153	0.01	0.07		CFAP43	1.4627e-08	0.00038621	-0.150214	0.051	0.146		KCTD8	1.45786e-08	0.000384934	0.438379	0.434	0.285
	AC012593.1	1.97335e-81	5.21044e-77	0.350579	0.348	0.153		MEG3	5.28478e-10	1.39539e-05	-0.275784	0.108	0.218		CDK6	7.67722e-58	2.02709e-53	-0.241501	0.167	0.32		AC019197.1	8.59162e-07	0.0226853	-0.227524	0.441	0.516		FGF9	2.95264e-20	7.79614e-16	0.229762	0.234	0.079		SPAG16	1.47631e-08	0.000389804	-0.225213	0.401	0.608		JUNB	1.51001e-08	0.000398702	0.257944	0.283	0.136
	AC068051.1	1.99332e-81	5.26315e-77	0.237021	0.13	0.016		KHDRBS1	5.72746e-10	1.51228e-05	0.15816	0.318	0.197		MAGI1	8.13686e-58	2.14846e-53	-0.27274	0.857	0.905		DACH1	9.15429e-07	0.024171	-0.29846	0.163	0.23		AMPH	3.2367e-20	8.54619e-16	0.187586	0.122	0.007		ARHGEF3	1.48028e-08	0.000390853	-0.418784	0.537	0.679		ACTN4	1.51252e-08	0.000399365	0.349947	0.33	0.181
	SOD2	2.06175e-81	5.44384e-77	0.533021	0.33	0.146		FAM49B	5.93579e-10	1.56729e-05	0.198708	0.365	0.241		RNF19A	9.56701e-58	2.52607e-53	0.280997	0.319	0.182		PRKG1	1.03774e-06	0.0274005	-0.169847	0.536	0.612		IQUB	3.287e-20	8.679e-16	-0.130979	0.038	0.131		EGOT	1.4944e-08	0.000394581	-0.165717	0.048	0.142		RPL13A	1.57261e-08	0.000415231	-0.16411	0.084	0.193
	USP2	2.11325e-81	5.57982e-77	-0.244277	0.038	0.204		AIG1	6.02649e-10	1.59123e-05	-0.261335	0.39	0.504		NTRK2	1.13958e-57	3.00894e-53	-0.260399	0.212	0.37		IMMP2L	1.06184e-06	0.0280368	0.148705	0.923	0.909		MAP3K15	3.65226e-20	9.64343e-16	0.250504	0.267	0.102		SYTL3	1.52126e-08	0.000401675	-0.114606	0.017	0.079		PIGR	1.59458e-08	0.000421033	-0.116021	0.029	0.101
	DOCK1	2.70317e-81	7.13744e-77	0.370409	0.558	0.338		PPP1CB	6.16624e-10	1.62813e-05	0.158493	0.328	0.207		NEK11	1.54347e-57	4.07538e-53	0.213179	0.294	0.157		ARHGAP26	1.09368e-06	0.0288776	0.157555	0.417	0.336		CTDSPL	4.01302e-20	1.0596e-15	0.328802	0.579	0.403		PVT1	1.65764e-08	0.000437684	-0.126259	0.029	0.104		USP53	1.61271e-08	0.00042582	-0.308996	0.394	0.561
	NDRG1	6.65117e-81	1.75618e-76	-0.3789	0.171	0.385		NFAT5	6.19115e-10	1.63471e-05	0.237462	0.631	0.507		LSAMP	1.6118e-57	4.25581e-53	-0.209091	0.04	0.151		BHLHE40	1.17817e-06	0.0311085	0.155516	0.31	0.233		AC092546.1	4.50493e-20	1.18948e-15	0.211105	0.151	0.023		MIR2052HG	1.92737e-08	0.000508902	-0.149806	0.031	0.108		ERBB4	1.64631e-08	0.00043469	-0.317409	0.803	0.869
	PRKG1	9.22409e-81	2.43553e-76	0.293777	0.166	0.032		AGPS	6.70309e-10	1.76988e-05	0.187378	0.4	0.274		ZHX3	2.63523e-57	6.95807e-53	-0.310054	0.383	0.541		TGFBR2	1.19461e-06	0.0315426	-0.140225	0.247	0.323		AC093817.2	5.76181e-20	1.52135e-15	-0.160008	0.007	0.062		STK24	1.98103e-08	0.000523072	-0.244298	0.229	0.396		GAA	1.7523e-08	0.000462678	-0.110355	0.036	0.116
	SLC13A1	9.68371e-81	2.55689e-76	-0.25299	0.47	0.753		LINC01320	6.91717e-10	1.82641e-05	-0.295948	0.765	0.819		NPAS2	3.97806e-57	1.05037e-52	0.135087	0.116	0.034		C11orf49	1.23947e-06	0.032727	0.111215	0.442	0.353		BIRC3	6.37077e-20	1.68214e-15	-0.113867	0.007	0.062		ATP12A	1.98437e-08	0.000523952	0.230598	0.133	0.008		ABTB2	1.80745e-08	0.00047724	0.460262	0.609	0.466
	FAM171A1	1.00993e-80	2.66661e-76	0.260182	0.226	0.066		BICDL1	7.3569e-10	1.94252e-05	-0.259939	0.328	0.458		RHEX	4.35053e-57	1.14871e-52	0.190677	0.081	0.017		AC124017.1	1.2476e-06	0.0329417	-0.115184	0.021	0.058		ALDH1A2	8.40317e-20	2.21877e-15	-0.295156	0.182	0.341		MTRNR2L8	2.04267e-08	0.000539347	-0.156639	0.031	0.108		DNAH5	1.85018e-08	0.000488521	-0.160013	0.101	0.217
	SCIN	1.0576e-80	2.79249e-76	0.181322	0.112	0.008		RAB31	7.66095e-10	2.0228e-05	0.118137	0.098	0.036		ARHGAP26	4.35398e-57	1.14963e-52	0.282584	0.367	0.222		MMS22L	1.32446e-06	0.034971	0.184062	0.216	0.151		FAM149A	1.23051e-19	3.24903e-15	-0.102343	0.018	0.09		TRABD2B	2.05784e-08	0.000543352	-0.469326	0.52	0.633		AC011447.3	2.08355e-08	0.000550139	-0.200083	0.143	0.273
	SETBP1	1.33907e-80	3.53567e-76	-0.424869	0.47	0.667		PTPRE	8.09744e-10	2.13805e-05	0.139935	0.165	0.08		NRCAM	5.42853e-57	1.43335e-52	-0.2618	0.231	0.391		RAI14	1.36476e-06	0.0360352	0.118089	0.318	0.241		CAMK2D	1.23394e-19	3.25811e-15	-0.208936	0.113	0.247		HMGCS1	2.13663e-08	0.000564155	0.491037	0.239	0.083		DANT2	2.08431e-08	0.000550342	0.355015	0.707	0.596
	NRP1	2.19637e-80	5.7993e-76	0.593942	0.686	0.514		PPP2R2B	1.00412e-09	2.65127e-05	-0.181469	0.023	0.1		MAGED1	6.2815e-57	1.65857e-52	-0.260885	0.227	0.384		MYH9	1.36721e-06	0.0360997	0.132079	0.22	0.153		AC011751.1	1.30292e-19	3.44022e-15	-0.139035	0.009	0.068		AC127526.2	2.34245e-08	0.000618501	-0.222334	0.184	0.342		GALNT18	2.23051e-08	0.000588944	0.36931	0.478	0.341
	PROSER2	3.82159e-80	1.00905e-75	0.180841	0.122	0.012		CLCN5	1.02287e-09	2.70079e-05	-0.17589	0.108	0.218		AL136234.1	6.7239e-57	1.77538e-52	0.114905	0.107	0.029		NRAD1	1.41477e-06	0.0373556	0.108233	0.179	0.117		ASAP1	1.31304e-19	3.46696e-15	-0.261161	0.191	0.348		MYO6	2.49043e-08	0.000657573	-0.312109	0.611	0.742		KLHL28	2.30893e-08	0.00060965	-0.135246	0.075	0.178
	CRYM	4.00913e-80	1.05857e-75	-0.247589	0.035	0.195		P4HA2	1.02355e-09	2.70259e-05	-0.140718	0.039	0.125		ULK4	6.82272e-57	1.80147e-52	0.233387	0.361	0.213		LDLRAD4	1.41729e-06	0.0374222	0.123481	0.422	0.331		DPYD	1.39011e-19	3.67045e-15	-0.238425	0.161	0.312		MCTP2	2.52902e-08	0.000667762	-0.152463	0.059	0.158		NPHP1	2.35195e-08	0.000621009	-0.159029	0.108	0.226
	C3	9.33728e-80	2.46542e-75	0.209135	0.102	0.005		AC009053.3	1.0858e-09	2.86696e-05	-0.142025	0.044	0.132		KLF12	9.83334e-57	2.59639e-52	-0.283024	0.402	0.561		RIMBP2	1.53311e-06	0.0404803	-0.114133	0.198	0.276		IGF2BP2	1.49966e-19	3.9597e-15	-0.291037	0.338	0.511		NCEH1	2.82933e-08	0.000747058	-0.245397	0.081	0.192		AC097662.1	2.55985e-08	0.000675902	-0.130667	0.036	0.113
	C12orf75	2.35776e-79	6.22542e-75	0.290423	0.313	0.127		KCNQ1OT1	1.09276e-09	2.88532e-05	-0.256093	0.37	0.504		KIFC3	1.81181e-56	4.78391e-52	-0.250703	0.35	0.521		AGBL4	1.54633e-06	0.0408294	0.153286	0.617	0.528		KLF7	1.72339e-19	4.55044e-15	-0.158951	0.058	0.164		ZNRF2	2.85571e-08	0.000754021	-0.255367	0.2	0.354		G3BP2	2.58487e-08	0.000682509	0.279744	0.219	0.089
	PCBP1-AS1	2.45073e-79	6.4709e-75	-0.340783	0.171	0.384		KCNQ5	1.2399e-09	3.27384e-05	0.202765	0.083	0.028		PDLIM5	3.23243e-56	8.5349e-52	0.266064	0.382	0.238		GMDS-DT	1.58425e-06	0.0418306	0.141514	0.607	0.528		ZEB1	1.87259e-19	4.94439e-15	-0.128785	0.017	0.087		AC025159.1	2.95832e-08	0.000781114	-0.153809	0.064	0.167		HIF1A	2.59116e-08	0.00068417	-0.410855	0.377	0.516
	SLC23A3	3.27023e-79	8.63473e-75	-0.245166	0.035	0.194		ENO1	1.25985e-09	3.3265e-05	0.149676	0.272	0.162		ATP5F1C	3.26892e-56	8.63126e-52	-0.205916	0.149	0.297		PAPSS2	1.60118e-06	0.0422775	-0.136952	0.154	0.223		NEK11	2.00211e-19	5.28638e-15	-0.230245	0.188	0.347		GLS	3.07694e-08	0.000812434	-0.335486	0.656	0.812		CYSTM1	2.66267e-08	0.00070305	0.260796	0.299	0.151
	NAT1	4.43114e-79	1.17e-74	-0.227972	0.026	0.178		BICC1	1.2632e-09	3.33537e-05	0.302647	0.922	0.913		CABLES1	4.63927e-56	1.22495e-51	0.167813	0.149	0.055		AKAP13	1.67001e-06	0.0440949	0.170155	0.578	0.509		KANSL1	2.10647e-19	5.56192e-15	0.290915	0.649	0.482		ROBO2	3.23339e-08	0.000853746	-0.187588	0.024	0.092		MAL	2.79607e-08	0.000738274	0.498879	0.33	0.187
	FABP1	5.76182e-79	1.52135e-74	-0.231286	0.008	0.142		PALLD	1.2721e-09	3.35884e-05	0.215891	0.359	0.243		EGOT	7.003e-56	1.84907e-51	0.162488	0.124	0.04		MSN	1.69676e-06	0.0448013	0.137533	0.212	0.148		TNFRSF11B	2.22954e-19	5.88687e-15	-0.106731	0.015	0.083		HLA-B	3.37874e-08	0.000892124	-0.114637	0.028	0.1		GSR	2.91565e-08	0.000769849	0.269749	0.286	0.139
	PDE1A	9.9359e-79	2.62347e-74	0.415209	0.122	0.014		KLHL13	1.32965e-09	3.5108e-05	0.316782	0.396	0.281		LINC02351	9.67096e-56	2.55352e-51	0.124991	0.088	0.02		AKAP12	1.7872e-06	0.0471892	0.123198	0.067	0.03		TBC1D8	2.52752e-19	6.67368e-15	-0.249513	0.185	0.34		AC012593.1	3.39273e-08	0.000895817	-0.128864	0.034	0.112		LIN7A	2.92593e-08	0.000772561	-0.17875	0.14	0.27
	AC105094.2	1.65075e-78	4.35864e-74	-0.426806	0.02	0.164		FILIP1L	1.337e-09	3.53023e-05	0.123456	0.155	0.074		EPB41L3	1.09877e-55	2.90119e-51	-0.245821	0.115	0.252		SSH2	1.80521e-06	0.0476647	0.114137	0.567	0.473		GALNT11	2.63141e-19	6.94799e-15	-0.279	0.277	0.446		LINC01515	3.40186e-08	0.000898227	-0.145741	0.052	0.146		RAB40C	2.94266e-08	0.00077698	0.246321	0.251	0.113
	PDE3A	1.66691e-78	4.40132e-74	-0.361595	0.121	0.321		AC004870.4	1.50395e-09	3.97104e-05	-0.144794	0.008	0.073		CADPS2	1.12738e-55	2.97674e-51	-0.299979	0.437	0.584		SH3D19	1.8874e-06	0.049835	0.125473	0.358	0.277		RHEX	2.68702e-19	7.09481e-15	-0.141771	0.011	0.07		LRRC49	3.45756e-08	0.000912933	-0.15019	0.098	0.221		KCNIP1	3.00145e-08	0.000792502	-0.163801	0.118	0.243
	MED13L	1.91887e-78	5.06659e-74	0.427701	0.631	0.452		WSB1	1.56542e-09	4.13333e-05	0.18731	0.457	0.329		TNFAIP8	1.15086e-55	3.03872e-51	0.187164	0.179	0.075		BICD1	1.9683e-06	0.0519709	0.193727	0.393	0.324		HIVEP3	3.68161e-19	9.72094e-15	-0.213345	0.104	0.233		WHRN	3.78621e-08	0.000999711	-0.140073	0.045	0.133		ANTXR1	3.13814e-08	0.000828595	-0.106953	0.037	0.116
	PDZRN3	2.62043e-78	6.91898e-74	-0.389559	0.326	0.553		SYNDIG1	1.65566e-09	4.3716e-05	-0.241844	0.178	0.297		RPS6KA6	1.28202e-55	3.38505e-51	-0.25555	0.216	0.369		BRD4	2.14655e-06	0.0566774	0.103877	0.263	0.192		NRG2	4.38945e-19	1.15899e-14	0.215287	0.191	0.052		MROH7	3.80528e-08	0.00100475	0.272389	0.291	0.125		CIT	3.20504e-08	0.000846258	-0.147085	0.07	0.169
	PLA2G4C	7.70402e-78	2.03417e-73	0.208009	0.147	0.025		CTNNA1	1.66498e-09	4.3962e-05	0.203068	0.546	0.422		CMTM4	1.64934e-55	4.35492e-51	-0.249048	0.234	0.391		NTN4	2.21397e-06	0.0584577	0.199384	0.366	0.29		MCTP2	4.40925e-19	1.16422e-14	-0.104222	0.016	0.084		CSGALNACT1	4.21233e-08	0.00111222	0.390721	0.444	0.279		ADAMTS1	3.30277e-08	0.000872064	-0.127922	0.011	0.062
	RBMS3-AS3	8.08118e-78	2.13376e-73	0.186263	0.14	0.022		RGL1	1.69097e-09	4.46483e-05	-0.200671	0.214	0.338		BDH1	6.61864e-55	1.74759e-50	-0.175338	0.071	0.193		MLLT3	2.22436e-06	0.0587319	0.179082	0.45	0.367		ITGB5	4.41357e-19	1.16536e-14	0.284112	0.411	0.236		CD24	4.32409e-08	0.00114173	-0.168813	0.121	0.254		ZNF19	3.39347e-08	0.000896011	-0.124281	0.049	0.136
	MMP7	8.82689e-78	2.33065e-73	0.221326	0.105	0.007		ALDH8A1	1.75526e-09	4.63458e-05	-0.150074	0.083	0.185		LINC01138	6.86427e-55	1.81244e-50	0.193946	0.269	0.139		PLEKHA5	2.43944e-06	0.0644111	-0.156	0.669	0.732		CDC42BPA	4.44985e-19	1.17494e-14	-0.278922	0.366	0.536		SBNO2	4.39354e-08	0.00116007	-0.108415	0.038	0.121		AC090579.1	3.44076e-08	0.000908497	-0.165409	0.043	0.125
	AL360169.3	1.94636e-77	5.13917e-73	-0.203101	0.015	0.155		PITPNB	1.86547e-09	4.9256e-05	0.171743	0.297	0.187		S100A11	8.34761e-55	2.2041e-50	0.101394	0.088	0.021		KLHL13	2.45314e-06	0.0647727	-0.19443	0.65	0.723		FP236383.3	4.75322e-19	1.25504e-14	-0.519933	0.591	0.722		FGFR2	4.39834e-08	0.00116134	-0.307732	0.187	0.329		KAZN	3.68801e-08	0.000973782	-0.373995	0.895	0.929
	OTOGL	3.14454e-77	8.30283e-73	-0.303291	0.035	0.19		GHR	1.89551e-09	5.00489e-05	-0.19804	0.108	0.214		PALM	8.82526e-55	2.33022e-50	-0.160514	0.04	0.148		S100A6	2.49639e-06	0.0659147	-0.144552	0.188	0.259		STK32A	4.86643e-19	1.28493e-14	-0.241981	0.156	0.301		TXNIP	4.45842e-08	0.0011772	0.488947	0.446	0.288		PRSS23	3.79566e-08	0.00100221	-0.146232	0.072	0.172
	GFRA1	3.78366e-77	9.99037e-73	0.197184	0.104	0.007		ABCB1	1.93864e-09	5.11878e-05	0.334251	0.409	0.296		KIRREL1	9.05251e-55	2.39023e-50	0.188704	0.213	0.099		PRDM16	2.62625e-06	0.0693436	-0.125798	0.209	0.282		COL14A1	5.2834e-19	1.39503e-14	-0.149497	0.034	0.122		C4orf19	5.87908e-08	0.00155231	-0.338405	0.484	0.658		WDR78	3.93565e-08	0.00103917	-0.177294	0.116	0.234
	PCK2	5.5232e-77	1.45835e-72	-0.212672	0.024	0.172		CTBP2	1.97722e-09	5.22065e-05	0.202574	0.478	0.348		PKP4	1.19899e-54	3.1658e-50	-0.281824	0.791	0.868		KANSL1L	2.63971e-06	0.0696988	0.15856	0.584	0.517		ACTB	6.11697e-19	1.61512e-14	-0.141643	0.046	0.142		TANC2	5.93572e-08	0.00156727	-0.265901	0.522	0.7		EFCAB13	4.09964e-08	0.00108247	-0.210384	0.149	0.279
	DPEP1	7.34099e-77	1.93832e-72	-0.290783	0.124	0.322		TRAF1	1.99953e-09	5.27957e-05	0.226214	0.091	0.034		GABRB2	1.82182e-54	4.81035e-50	0.154503	0.111	0.033		FTO	2.82156e-06	0.0745004	0.120223	0.508	0.424		CRYBG1	6.69965e-19	1.76897e-14	-0.240481	0.191	0.347		BCAR3	6.01919e-08	0.00158931	0.314185	0.33	0.167		MIA2	4.39862e-08	0.00116141	-0.198873	0.155	0.285
	DGKB	9.07978e-77	2.39743e-72	-0.378335	0.106	0.296		PPM1H	2.04606e-09	5.40242e-05	-0.192578	0.162	0.278		AC016705.2	1.98848e-54	5.25038e-50	-0.207582	0.118	0.255		LMO7	3.04601e-06	0.0804269	-0.165943	0.534	0.605		SHROOM3	7.34969e-19	1.94061e-14	0.314549	0.554	0.373		SGK2	7.56541e-08	0.00199757	0.259374	0.334	0.162		EML1	4.48402e-08	0.00118396	-0.114167	0.036	0.113
	ADORA2A-AS1	1.21813e-76	3.21636e-72	-0.288434	0.111	0.305		MIR99AHG	2.07374e-09	5.47551e-05	-0.225936	0.401	0.545		GALNT18	2.31486e-54	6.11216e-50	-0.293123	0.424	0.577		PDZRN3	3.31873e-06	0.0876278	-0.113593	0.137	0.203		PPARG	7.62144e-19	2.01236e-14	-0.106731	0.014	0.077		KHDRBS3	7.80984e-08	0.00206211	-0.214311	0.134	0.267		ITPR2	4.6705e-08	0.0012332	-0.28868	0.379	0.534
	AC004485.1	1.30634e-76	3.44926e-72	-0.396297	0.253	0.474		SLMAP	2.08013e-09	5.49238e-05	0.203266	0.507	0.384		ATP6V0D2	2.8653e-54	7.56554e-50	-0.157662	0.009	0.093		ZHX3	3.37311e-06	0.0890636	-0.133559	0.336	0.413		CNGA1	7.72362e-19	2.03934e-14	-0.101773	0.017	0.086		SEC24B-AS1	7.86193e-08	0.00207586	-0.102935	0.031	0.104		JADE3	4.8033e-08	0.00126826	-0.151918	0.099	0.211
	HDAC7	1.62965e-76	4.30293e-72	0.140635	0.101	0.006		ZSWIM6	2.19796e-09	5.80349e-05	0.25297	0.532	0.416		AL358335.2	2.94222e-54	7.76865e-50	-0.145859	0.01	0.095		NPEPPS	3.389e-06	0.0894832	0.122341	0.485	0.401		CTTNBP2	9.28426e-19	2.45142e-14	-0.11629	0.017	0.084		RPS19	7.92401e-08	0.00209226	-0.141144	0.071	0.175		MAGI3	4.83123e-08	0.00127564	0.341972	0.625	0.51
	TIPARP	2.85397e-76	7.53561e-72	-0.338891	0.064	0.236		TFEC	2.35872e-09	6.22796e-05	-0.171648	0.127	0.237		SLC25A12	5.45761e-54	1.44103e-49	-0.227498	0.271	0.43		ACSL3	3.40809e-06	0.0899873	-0.111332	0.146	0.212		AC023194.3	1.0102e-18	2.66734e-14	0.157868	0.114	0.007		SLC1A1	8.65542e-08	0.00228538	-0.184052	0.067	0.167		ACAA1	4.90884e-08	0.00129613	-0.117129	0.045	0.128
	PCLO	3.42801e-76	9.05131e-72	-0.404479	0.43	0.633		MYEF2	2.632e-09	6.94954e-05	0.169124	0.351	0.233		KRBA2	5.493e-54	1.45037e-49	-0.165101	0.055	0.169		AC044810.2	3.45916e-06	0.0913357	0.105174	0.178	0.118		PCAT1	1.10328e-18	2.91309e-14	-0.286586	0.243	0.402		LINC01948	8.76881e-08	0.00231532	-0.128655	0.049	0.138		AC044810.2	5.00085e-08	0.00132042	-0.21834	0.144	0.27
	ELL2	7.79532e-76	2.05828e-71	-0.38391	0.233	0.443		AC034195.1	2.65274e-09	7.00429e-05	-0.254148	0.175	0.29		LAMC1	5.93563e-54	1.56724e-49	0.226165	0.294	0.163		FAAH2	3.46765e-06	0.0915597	0.142866	0.453	0.374		ARHGAP42	1.176e-18	3.10511e-14	-0.10052	0.017	0.084		GLDC	8.82177e-08	0.0023293	0.287435	0.423	0.25		ADAMTSL3	5.082e-08	0.00134185	-0.222233	0.335	0.493
	DCLK1	1.19438e-75	3.15363e-71	0.299434	0.128	0.018		ALPK2	2.66381e-09	7.03352e-05	0.257521	0.483	0.366		DNAJC19	6.62039e-54	1.74805e-49	-0.167894	0.061	0.178		PHLDB2	3.58656e-06	0.0946995	-0.119229	0.367	0.447		MPC1	1.22182e-18	3.22611e-14	0.250041	0.385	0.206		PKM	9.28219e-08	0.00245087	-0.200513	0.221	0.383		RPS18	5.21497e-08	0.00137696	-0.121244	0.045	0.128
	AFF2	1.23066e-75	3.24943e-71	0.229285	0.174	0.04		WWOX	2.74086e-09	7.23698e-05	-0.260002	0.737	0.818		LINC01205	7.19199e-54	1.89897e-49	-0.133713	0.005	0.085		LINC02351	3.686e-06	0.0973251	0.10201	0.117	0.069		SHMT1	1.27051e-18	3.35464e-14	-0.108793	0.023	0.097		SPATS2L	9.32696e-08	0.00246269	-0.215506	0.27	0.438		PLEKHG1	5.89757e-08	0.0015572	-0.174843	0.101	0.211
	PANK1	4.12053e-75	1.08798e-70	-0.271212	0.076	0.253		PGGHG	2.82136e-09	7.44951e-05	0.115689	0.163	0.08		CSRP2	1.49279e-53	3.94157e-49	-0.149086	0.028	0.126		EFCAB2	3.74937e-06	0.0989984	0.111095	0.316	0.239		TMEM116	1.44283e-18	3.80966e-14	0.237026	0.335	0.166		CLIC6	9.99749e-08	0.00263974	-0.106437	0.019	0.079		PTGES3	6.32709e-08	0.0016706	0.263663	0.344	0.196
	SPATA13	6.241e-75	1.64787e-70	0.31058	0.31	0.13		BMP2K	2.92774e-09	7.73041e-05	0.223596	0.436	0.317		GPC4	2.04408e-53	5.39719e-49	0.212032	0.182	0.079		CHL1	3.78077e-06	0.0998274	-0.125904	0.354	0.438		SGCD	1.51548e-18	4.00147e-14	0.340674	0.122	0.012		TMEM51	1.00016e-07	0.00264082	-0.228029	0.207	0.358		AC010201.3	6.45843e-08	0.00170528	-0.152274	0.084	0.187
	CD2AP	6.2727e-75	1.65624e-70	0.382254	0.513	0.314		GRIA3	2.97791e-09	7.86289e-05	-0.14978	0.065	0.158		UGT8	2.84279e-53	7.50611e-49	-0.244687	0.436	0.598		GTDC1	3.87217e-06	0.102241	0.101397	0.218	0.152		FREM1	1.63153e-18	4.30789e-14	0.288504	0.687	0.521		CCDC14	1.12803e-07	0.00297845	-0.195616	0.158	0.3		CASP4	6.92182e-08	0.00182764	-0.131355	0.074	0.172
	AC006159.2	8.37418e-75	2.21112e-70	-0.215546	0.031	0.181		NAV2	3.00979e-09	7.94704e-05	0.144422	0.152	0.073		ADAMTS16	3.19041e-53	8.42397e-49	-0.209847	0.103	0.235		RNF150	3.87662e-06	0.102358	-0.141015	0.388	0.472		HLF	1.82504e-18	4.81885e-14	-0.245037	0.164	0.308		EFCAB6	1.13216e-07	0.00298936	-0.216707	0.166	0.304		NCKAP5	7.23444e-08	0.00191018	0.194653	0.156	0.045
	AKAP12	8.70274e-75	2.29787e-70	0.468947	0.359	0.164		ST18	3.0864e-09	8.14933e-05	-0.143781	0.028	0.105		IGF2BP2	5.50482e-53	1.45349e-48	0.251946	0.312	0.179		CTTNBP2	3.99888e-06	0.105586	0.116151	0.211	0.148		RHBG	1.8608e-18	4.91324e-14	0.2167	0.271	0.113		AC002460.2	1.13997e-07	0.00300998	-0.349499	0.394	0.567		LRRIQ1	7.24195e-08	0.00191217	-0.211395	0.221	0.365
	TMSB10	1.50271e-74	3.96776e-70	0.181079	0.12	0.014		GPAT3	3.28387e-09	8.67073e-05	-0.213465	0.055	0.145		KAZN	5.60511e-53	1.47997e-48	0.46946	0.89	0.849		AGAP1	4.32209e-06	0.11412	0.134861	0.678	0.595		IMMP2L	2.0094e-18	5.30562e-14	-0.342998	0.79	0.898		JAG1	1.15769e-07	0.00305676	-0.10232	0.044	0.129		C8orf37-AS1	7.47126e-08	0.00197271	-0.191756	0.081	0.181
	C11orf80	1.82491e-74	4.8185e-70	0.21784	0.179	0.043		ABLIM2	3.51026e-09	9.2685e-05	0.104065	0.152	0.073		ARFGEF1	5.66686e-53	1.49628e-48	0.240394	0.484	0.334		LINC02343	4.56087e-06	0.120425	-0.151423	0.142	0.205		EMX1	2.02998e-18	5.35995e-14	0.23177	0.431	0.247		IL1RAPL1	1.25423e-07	0.00331166	-0.334627	0.143	0.275		ANKS1B	7.63207e-08	0.00201517	0.362596	0.197	0.074
	SLC13A2	2.4828e-74	6.55559e-70	-0.214688	0.014	0.147		EAF2	3.51752e-09	9.28766e-05	-0.141591	0.057	0.147		HPN	7.999e-53	2.11206e-48	-0.220185	0.195	0.345		SLC5A3	4.86165e-06	0.128367	-0.134998	0.277	0.349		CCDC40	2.05848e-18	5.4352e-14	-0.139617	0.044	0.137		ZBTB46	1.29507e-07	0.00341949	-0.114666	0.04	0.121		FAM199X	8.3932e-08	0.00221614	-0.138849	0.076	0.175
	CDK6	6.23514e-74	1.64633e-69	0.259594	0.211	0.063		FNBP1L	3.54681e-09	9.365e-05	0.193697	0.594	0.46		VEPH1	9.02894e-53	2.384e-48	-0.214333	0.151	0.294		TBL1X	5.58394e-06	0.147438	0.125757	0.411	0.332		SH3PXD2A	2.0692e-18	5.46353e-14	0.231421	0.251	0.098		PROSER2	1.31563e-07	0.00347379	-0.105837	0.042	0.125		EMX2OS	8.63026e-08	0.00227873	-0.248376	0.194	0.326
	TOX	7.57101e-74	1.99905e-69	0.242327	0.171	0.04		PPARA	3.59079e-09	9.48112e-05	-0.23942	0.263	0.379		DAB2	9.04198e-53	2.38744e-48	0.16965	0.194	0.087		SGPP2	6.73197e-06	0.177751	0.139163	0.344	0.274		AL513164.1	2.08789e-18	5.51288e-14	-0.119049	0.032	0.115		AC017074.1	1.34475e-07	0.00355069	-0.106599	0.036	0.112		KANSL1L	8.78356e-08	0.00231921	-0.252204	0.536	0.685
	AL050309.1	8.48184e-74	2.23954e-69	0.418841	0.56	0.351		VIM	3.76877e-09	9.95107e-05	0.134099	0.237	0.137		LINC02437	1.24482e-52	3.28682e-48	-0.14504	0.029	0.128		GPC6	7.43291e-06	0.196259	0.268888	0.424	0.356		AL022068.1	2.12075e-18	5.59964e-14	-0.118492	0.02	0.091		CPEB3	1.37294e-07	0.00362511	0.33979	0.519	0.358		LRRC49	8.88464e-08	0.0023459	-0.138605	0.104	0.217
	GRM8	9.33023e-74	2.46355e-69	0.223426	0.118	0.014		CNTNAP3B	3.83043e-09	0.000101139	-0.201356	0.457	0.589		INSR	1.37205e-52	3.62275e-48	-0.241368	0.175	0.321		HIVEP3	7.67344e-06	0.20261	0.137362	0.372	0.3		KALRN	2.1319e-18	5.62908e-14	-0.25647	0.111	0.236		GMDS	1.39444e-07	0.00368188	-0.267718	0.335	0.512		NCOR1	8.89609e-08	0.00234892	0.286241	0.659	0.537
	NEK11	1.10867e-73	2.92734e-69	0.281688	0.304	0.126		YWHAZ	3.89977e-09	0.00010297	0.162836	0.281	0.173		XKR6	1.70538e-52	4.50289e-48	0.246992	0.427	0.277		DENND4A	7.98581e-06	0.210857	0.103849	0.282	0.212		GPC5-AS2	2.51217e-18	6.63313e-14	0.183766	0.155	0.032		PCSK5	1.39594e-07	0.00368584	-0.133093	0.043	0.125		ZMAT3	9.40276e-08	0.00248271	-0.110552	0.049	0.134
	ST6GAL1	1.32765e-73	3.50552e-69	0.170503	0.101	0.007		MLXIPL	3.99883e-09	0.000105585	-0.166471	0.106	0.21		VAT1L	1.76497e-52	4.66023e-48	-0.21225	0.022	0.114		TTC28	8.08351e-06	0.213437	0.116598	0.425	0.345		CYFIP2	2.63742e-18	6.96384e-14	0.291689	0.439	0.264		ARHGEF10	1.39852e-07	0.00369266	-0.145241	0.072	0.175		PRICKLE1	1.06601e-07	0.00281468	-0.219649	0.08	0.178
	BACH2	2.2972e-73	6.06554e-69	0.256938	0.132	0.02		FRMD3	4.10061e-09	0.000108272	-0.258871	0.282	0.41		LTBP2	2.14104e-52	5.6532e-48	-0.146344	0.031	0.13		AC138305.1	8.25046e-06	0.217845	-0.164484	0.306	0.38		EFNA5	3.01521e-18	7.96135e-14	-0.388399	0.832	0.88		TSPAN12	1.40435e-07	0.00370804	-0.1938	0.077	0.179		UBA6-AS1	1.18508e-07	0.0031291	-0.240039	0.21	0.347
	FOSL2	3.04124e-73	8.0301e-69	0.194105	0.138	0.023		ZBTB20-AS5	4.1056e-09	0.000108404	0.1704	0.295	0.186		CP	3.2654e-52	8.62195e-48	0.105026	0.057	0.008		ESRP1	8.4816e-06	0.223948	-0.103368	0.175	0.241		LINC00271	3.19514e-18	8.43644e-14	-0.276386	0.324	0.492		CWH43	1.45061e-07	0.00383018	0.233611	0.286	0.121		PMEPA1	1.20984e-07	0.00319445	-0.123133	0.035	0.107
	NT5DC1	3.78034e-73	9.98162e-69	-0.351729	0.331	0.542		PPFIBP1	4.11617e-09	0.000108683	0.211704	0.79	0.694		PRODH	3.5157e-52	9.28284e-48	-0.112471	0.002	0.077		PAX8-AS1	8.63342e-06	0.227957	0.144749	0.521	0.453		MAN1A1	3.4872e-18	9.20761e-14	0.327098	0.591	0.424		LRBA	1.45248e-07	0.00383512	0.281884	0.876	0.812		AC005208.1	1.24647e-07	0.00329119	-0.210094	0.261	0.407
	RBM47	4.29921e-73	1.13516e-68	-0.352611	0.6	0.786		CARMIL1	4.22368e-09	0.000111522	0.202575	0.498	0.368		CEMIP2	9.21989e-52	2.43442e-47	0.183	0.172	0.073		CCDC148	8.65332e-06	0.228482	-0.204993	0.45	0.508		PRKX	3.64786e-18	9.63181e-14	-0.110531	0.023	0.095		VEPH1	1.5528e-07	0.00410002	0.281168	0.352	0.188		SPATA6L	1.25075e-07	0.00330247	-0.179982	0.173	0.303
	PDE7B	1.23593e-72	3.26334e-68	0.32789	0.334	0.148		FTCD	4.23736e-09	0.000111883	-0.243387	0.23	0.354		ST6GALNAC5	9.32507e-52	2.46219e-47	-0.15186	0.013	0.099		CLDN10-AS1	8.75819e-06	0.231251	-0.126442	0.431	0.51		RBMS1	3.85786e-18	1.01863e-13	-0.328289	0.446	0.597		AC008014.1	1.58775e-07	0.0041923	0.418173	0.551	0.412		PDK4	1.25733e-07	0.00331985	0.528542	0.14	0.036
	DIRC3	1.29502e-72	3.41936e-68	-0.335388	0.119	0.307		RBMS1	4.67672e-09	0.000123484	0.19064	0.55	0.413		CPT1A	1.66611e-51	4.39919e-47	-0.217084	0.163	0.304		SLC4A7	9.08279e-06	0.239822	-0.12828	0.399	0.478		CNTN4	5.28406e-18	1.3952e-13	-0.161834	0.038	0.126		FREM1	1.58878e-07	0.004195	0.310149	0.693	0.55		SHTN1	1.25968e-07	0.00332607	-0.146739	0.092	0.196
	KCNIP1	1.55394e-72	4.10302e-68	0.155181	0.087	0.003		TOX3	4.69535e-09	0.000123976	0.209239	0.356	0.239		DCDC1	1.67256e-51	4.41622e-47	0.202448	0.294	0.164		LINC02398	9.18397e-06	0.242494	-0.110437	0.063	0.11		NHSL1	5.66228e-18	1.49507e-13	-0.168999	0.046	0.138		PPFIBP2	1.62103e-07	0.00428016	-0.154865	0.084	0.192		LDHB	1.26034e-07	0.00332781	-0.143601	0.074	0.169
	CCND3	2.10341e-72	5.55384e-68	0.251764	0.178	0.044		TTLL7	4.73605e-09	0.000125051	0.215355	0.398	0.281		SCD5	3.74361e-51	9.88464e-47	-0.256288	0.256	0.411		LRRFIP1	1.01238e-05	0.267309	0.128185	0.533	0.46		CACHD1	6.50581e-18	1.71779e-13	0.308708	0.527	0.362		ACTB	1.677e-07	0.00442795	0.35868	0.285	0.133		GCA	1.27506e-07	0.00336667	-0.103907	0.036	0.11
	NFKB1	3.23497e-72	8.5416e-68	0.313826	0.288	0.118		FLNB	4.91864e-09	0.000129872	0.198324	0.429	0.309		SYTL2	6.2923e-51	1.66142e-46	0.294234	0.453	0.319		LPP	1.09831e-05	0.289997	0.157854	0.707	0.659		ATP8A1	6.81079e-18	1.79832e-13	0.28791	0.406	0.236		ARHGEF28	1.76792e-07	0.00466802	-0.223509	0.335	0.512		CASC19	1.42067e-07	0.00375114	-0.104771	0.045	0.125
	TRIM2	4.56052e-72	1.20416e-67	0.207266	0.166	0.038		KIAA1549	4.97252e-09	0.000131294	-0.192221	0.197	0.313		DPP4	7.81098e-51	2.06241e-46	0.118982	0.108	0.033		PDLIM5	1.16642e-05	0.307983	0.160774	0.421	0.357		EPB41L2	6.89042e-18	1.81935e-13	-0.111912	0.02	0.09		KCNK1	1.79759e-07	0.00474636	-0.143081	0.086	0.196		MIR3681HG	1.46499e-07	0.00386817	-0.106953	0.036	0.11
	LPGAT1	5.53313e-72	1.46097e-67	0.292583	0.357	0.169		PLG	5.056e-09	0.000133499	-0.106711	0	0.053		SHANK2	7.93126e-51	2.09417e-46	-0.266636	0.414	0.566		CTNND1	1.25034e-05	0.330141	-0.113842	0.672	0.723		SETBP1	9.09889e-18	2.40247e-13	-0.329142	0.59	0.711		IDI1	1.86952e-07	0.00493629	0.203807	0.118	0.008		KLHL13	1.46894e-07	0.00387859	-0.207641	0.16	0.285
	GLG1	5.95736e-72	1.57298e-67	-0.366043	0.411	0.606		PON2	5.09985e-09	0.000134657	0.151891	0.284	0.178		KCNQ1	9.83063e-51	2.59568e-46	-0.247635	0.347	0.501		PYGB	1.29148e-05	0.341003	-0.114938	0.136	0.195		NCEH1	9.33346e-18	2.46441e-13	-0.25455	0.09	0.204		YBX3	1.8947e-07	0.00500275	-0.158653	0.109	0.229		ASCC3	1.57701e-07	0.00416393	-0.177873	0.158	0.285
	PCNX2	6.43744e-72	1.69974e-67	0.24833	0.28	0.109		CDH6	5.19633e-09	0.000137204	0.319471	0.804	0.707		KIAA0232	1.06448e-50	2.81065e-46	-0.225024	0.236	0.385		SOX4	1.30469e-05	0.344489	0.110959	0.144	0.094		ATP6V1H	9.49647e-18	2.50745e-13	0.281194	0.506	0.34		THSD4	1.93165e-07	0.00510032	0.329298	0.301	0.142		HOXB9	1.6423e-07	0.00433634	-0.115479	0.055	0.139
	BIRC3	6.46816e-72	1.70785e-67	0.204152	0.088	0.003		SMIM2-AS1	5.21524e-09	0.000137703	-0.199481	0.232	0.355		RASSF8	1.23661e-50	3.26515e-46	-0.267033	0.273	0.422		LINC01138	1.31562e-05	0.347376	-0.10756	0.226	0.296		RNF19A	1.01079e-17	2.66889e-13	-0.289607	0.186	0.326		AUTS2	1.93597e-07	0.00511173	-0.197079	0.104	0.221		YWHAE	1.70647e-07	0.00450576	0.211453	0.247	0.116
	LAMB1	8.6176e-72	2.27539e-67	0.311242	0.354	0.166		AC009060.1	5.43805e-09	0.000143586	-0.182315	0.109	0.212		SORL1	1.40479e-50	3.70922e-46	-0.205434	0.151	0.29		GDF15	1.34483e-05	0.355089	0.12656	0.152	0.101		OXCT1	1.08886e-17	2.87503e-13	0.195942	0.166	0.041		TMEM178B	1.97326e-07	0.0052102	-0.138573	0.06	0.154		STC1	1.74828e-07	0.00461616	-0.101943	0.029	0.095
	ADAMTS3	1.38537e-71	3.65793e-67	0.176425	0.113	0.013		LHFPL3-AS2	5.81173e-09	0.000153453	-0.167325	0.095	0.195		DMGDH	1.46171e-50	3.85951e-46	-0.23325	0.272	0.428		STPG2	1.4014e-05	0.370025	-0.16259	0.271	0.336		PDE7B	1.11567e-17	2.94582e-13	0.369194	0.594	0.445		CD59	1.99429e-07	0.00526573	-0.125245	0.044	0.125		PPA2	1.78096e-07	0.00470245	-0.200717	0.252	0.395
	SEL1L3	1.63469e-71	4.31625e-67	0.274538	0.305	0.128		UPB1	5.82339e-09	0.000153761	-0.125509	0.026	0.1		RHOB	1.57697e-50	4.16384e-46	0.101435	0.084	0.021		HOXD3	1.47308e-05	0.388951	-0.104253	0.267	0.34		CTNNAL1	1.13178e-17	2.98835e-13	0.228296	0.24	0.094		UST	2.25568e-07	0.00595589	-0.130037	0.062	0.158		RPL13	1.81157e-07	0.00478326	-0.180365	0.089	0.19
	CD24	1.67071e-71	4.41135e-67	0.186075	0.157	0.033		PCLO	5.9291e-09	0.000156552	-0.23664	0.339	0.458		ADAMTS9-AS1	1.80109e-50	4.75561e-46	-0.226692	0.199	0.347		SMARCC1	1.47815e-05	0.39029	0.120287	0.355	0.289		SYTL3	1.20147e-17	3.17237e-13	-0.110531	0.023	0.094		RUFY3	2.31156e-07	0.00610343	-0.286637	0.367	0.521		DAPP1	1.86069e-07	0.00491297	-0.118274	0.024	0.086
	DHTKD1	1.68634e-71	4.45262e-67	-0.325801	0.186	0.385		DYNC2LI1	6.39276e-09	0.000168794	0.190688	0.318	0.21		PPFIBP1	1.89424e-50	5.00155e-46	0.231438	0.318	0.188		FAM13A	1.57747e-05	0.416515	-0.135371	0.345	0.416		TNS3	1.44623e-17	3.81861e-13	-0.333721	0.291	0.441		LINC-PINT	2.36789e-07	0.00625217	-0.277335	0.332	0.5		AC096741.1	1.9258e-07	0.00508488	-0.127373	0.044	0.122
	PLA2R1	1.91622e-71	5.05958e-67	0.230896	0.257	0.093		LINC01515	6.53011e-09	0.000172421	-0.280701	0.359	0.474		GSAP	1.94782e-50	5.14303e-46	-0.207626	0.184	0.329		MACF1	1.58098e-05	0.417443	0.12309	0.672	0.609		SNTB1	1.49086e-17	3.93648e-13	-0.207677	0.087	0.202		RSRP1	2.40977e-07	0.00636275	-0.196857	0.284	0.454		AC096711.2	1.94782e-07	0.00514303	-0.130619	0.072	0.166
	JAZF1	2.02149e-71	5.33755e-67	0.209252	0.156	0.033		AFM	6.81065e-09	0.000179828	-0.102675	0.003	0.059		MUC1	2.47436e-50	6.53329e-46	0.210964	0.3	0.173		PNISR	1.61198e-05	0.425627	-0.126922	0.412	0.482		ADAMTS9-AS1	1.50591e-17	3.97619e-13	0.309677	0.333	0.174		PRKAG2	2.51132e-07	0.00663089	0.404006	0.564	0.412		TSIX	1.98348e-07	0.00523717	-0.129464	0.051	0.134
	B2M	4.02215e-71	1.06201e-66	0.183767	0.137	0.023		NGEF	6.82127e-09	0.000180109	-0.135172	0.06	0.15		AGPAT4	2.8344e-50	7.48396e-46	-0.21572	0.167	0.308		ZHX2	1.61687e-05	0.426918	0.126753	0.405	0.335		SGK2	1.53982e-17	4.06574e-13	0.235428	0.416	0.24		DEPTOR	2.51828e-07	0.00664925	-0.291755	0.255	0.408		WWP1	2.07827e-07	0.00548748	-0.24031	0.391	0.543
	PTGR1	4.03818e-71	1.06624e-66	-0.337979	0.223	0.428		AC083837.1	6.85814e-09	0.000181082	0.394343	0.493	0.38		RAPGEF3	3.01803e-50	7.96881e-46	0.130312	0.143	0.055		LINC01117	1.61942e-05	0.427592	-0.140219	0.225	0.289		VAV3	1.81091e-17	4.78153e-13	0.328124	0.743	0.623		ARHGEF12	2.55272e-07	0.0067402	-0.229392	0.406	0.575		AL359710.1	2.11569e-07	0.00558626	-0.21711	0.159	0.282
	AC090579.1	8.66489e-71	2.28788e-66	0.262604	0.255	0.095		RIMS2	6.91677e-09	0.00018263	0.222916	0.176	0.093		IQGAP1	3.12651e-50	8.25523e-46	0.198927	0.315	0.183		MAGI3	1.6202e-05	0.427798	-0.175484	0.555	0.615		SLC25A29	1.81633e-17	4.79583e-13	-0.197254	0.162	0.305		KIF6	2.5592e-07	0.00675732	-0.116432	0.028	0.096		LEPROT	2.12062e-07	0.00559929	-0.100065	0.037	0.11
	FSTL3	1.29876e-70	3.42925e-66	0.17881	0.109	0.012		GPR89B	7.47568e-09	0.000197388	-0.139263	0.086	0.184		ZNF676	3.93287e-50	1.03844e-45	-0.19886	0.089	0.21		MED13L	1.63314e-05	0.431213	0.119943	0.729	0.655		TBL1X	2.02961e-17	5.35898e-13	0.323824	0.472	0.311		LINC00894	2.61899e-07	0.00691518	-0.225623	0.188	0.333		PLSCR2	2.12157e-07	0.00560181	-0.150124	0.102	0.211
	LINC01349	1.97967e-70	5.22712e-66	-0.24996	0.034	0.179		GLDC	8.2212e-09	0.000217073	0.224813	0.289	0.189		SGO1-AS1	5.2788e-50	1.39381e-45	-0.405335	0.288	0.435		ARNT2	1.74059e-05	0.459587	0.114374	0.416	0.34		PPM1L	2.04458e-17	5.39851e-13	0.264785	0.321	0.16		CLCN5	2.62955e-07	0.00694306	0.275372	0.369	0.2		CASC1	2.14407e-07	0.0056612	-0.131146	0.101	0.208
	CYB5A	2.19087e-70	5.78478e-66	-0.311311	0.222	0.424		ARHGEF10L	8.30425e-09	0.000219265	-0.18799	0.175	0.289		AC092683.1	5.32715e-50	1.40658e-45	0.182473	0.227	0.114		WWTR1	1.79653e-05	0.474356	0.147133	0.411	0.338		AL008633.1	2.05104e-17	5.41555e-13	-0.363429	0.284	0.438		RAB11FIP2	2.64919e-07	0.00699492	-0.236785	0.302	0.462		LHFPL2	2.3609e-07	0.00623371	-0.101808	0.028	0.092
	KCNAB2	9.6985e-70	2.56079e-65	-0.218337	0.04	0.189		HIBCH	8.35642e-09	0.000220643	-0.190862	0.272	0.395		MYRFL	8.0744e-50	2.13196e-45	0.211763	0.322	0.188		AC138123.1	1.81832e-05	0.48011	-0.12952	0.19	0.253		MAP4K3	2.14539e-17	5.66469e-13	0.334128	0.703	0.572		SLC19A2	2.65041e-07	0.00699815	0.264417	0.216	0.075		CDKN1C	2.45073e-07	0.00647091	0.296101	0.143	0.042
	AC090630.1	1.27853e-69	3.37584e-65	0.1574	0.112	0.013		C3orf52	8.57069e-09	0.0002263	0.114654	0.144	0.069		ACSL1	1.22935e-49	3.24597e-45	-0.217581	0.181	0.324		MUC1	1.94624e-05	0.513885	-0.113528	0.257	0.327		DNAH7	2.37474e-17	6.27025e-13	-0.250096	0.281	0.438		PRKY	2.6542e-07	0.00700816	-0.127668	0.061	0.154		HYDIN	2.45761e-07	0.00648907	-0.184347	0.218	0.353
	RIDA	2.40186e-69	6.34187e-65	-0.240153	0.081	0.251		MAL2	8.78903e-09	0.000232066	0.105311	0.117	0.052		AKAP13	1.43846e-49	3.79812e-45	0.266848	0.536	0.397		ZCCHC14	2.01625e-05	0.532371	0.109421	0.223	0.164		EFHD1	2.61525e-17	6.90531e-13	0.251004	0.337	0.174		GATA2	2.81099e-07	0.00742214	0.247136	0.181	0.05		HUNK	2.53014e-07	0.00668057	-0.23398	0.221	0.356
	EVA1C	4.46736e-69	1.17956e-64	0.226656	0.19	0.054		CTTNBP2NL	8.7968e-09	0.000232271	0.160137	0.351	0.236		SHISA9	1.94739e-49	5.1419e-45	-0.214487	0.108	0.238		OMA1	2.05841e-05	0.543503	-0.102278	0.168	0.23		ANGPT1	2.88258e-17	7.61116e-13	0.230761	0.184	0.055		TRIM56	2.81628e-07	0.00743611	-0.151371	0.091	0.2		MUC1	2.54643e-07	0.0067236	-0.153457	0.113	0.223
	LINC02027	4.58423e-69	1.21042e-64	-0.368915	0.388	0.591		RAB8B	1.02068e-08	0.000269501	0.13282	0.207	0.117		KANK1	1.99399e-49	5.26494e-45	-0.291069	0.377	0.523		COL8A1	2.11523e-05	0.558505	-0.105576	0.047	0.088		GUCY1A1	3.13239e-17	8.27077e-13	-0.15247	0.056	0.153		GAREM1	2.83659e-07	0.00748974	-0.259686	0.421	0.592		WDR63	2.57037e-07	0.0067868	-0.146232	0.08	0.175
	ENTPD5	5.06859e-69	1.33831e-64	-0.281436	0.16	0.355		DDC	1.03531e-08	0.000273363	-0.112041	0.026	0.098		SPANXA2-OT1	2.32722e-49	6.1448e-45	0.119912	0.072	0.015		LLGL2	2.17912e-05	0.575376	-0.117835	0.496	0.57		ABCA9	3.57396e-17	9.43668e-13	0.235929	0.216	0.079		VPS41	2.85313e-07	0.00753339	-0.1807	0.146	0.279		CDK14	2.59788e-07	0.00685944	-0.229896	0.286	0.43
	C11orf54	5.62397e-69	1.48495e-64	-0.316816	0.346	0.552		NAT8	1.04108e-08	0.000274887	-0.112041	0.026	0.098		STIM1	2.90162e-49	7.66145e-45	0.12256	0.126	0.044		AC079352.1	2.36659e-05	0.624875	0.193161	0.661	0.581		MID1	3.76061e-17	9.92953e-13	-0.320616	0.21	0.354		SGPP1	2.89012e-07	0.00763107	0.32148	0.366	0.208		PRTG	2.60497e-07	0.00687817	-0.207645	0.232	0.368
	EPHA7	8.13045e-69	2.14676e-64	0.552632	0.516	0.341		PANK1	1.10806e-08	0.000292573	-0.110177	0.023	0.093		PADI2	3.16082e-49	8.34583e-45	-0.134065	0.021	0.108		PRUNE2	2.476e-05	0.653764	0.10289	0.132	0.085		UFL1-AS1	3.92515e-17	1.0364e-12	-0.15214	0.045	0.134		GAB2	3.2656e-07	0.00862248	-0.14687	0.088	0.196		ZC3H12A	2.65e-07	0.00699707	0.165825	0.117	0.024
	LTF	9.10144e-69	2.40314e-64	0.29505	0.103	0.01		CACNA1E	1.25272e-08	0.000330769	-0.245095	0.054	0.137		AOPEP	3.22133e-49	8.5056e-45	0.303089	0.701	0.588		NRK	2.59455e-05	0.685064	-0.139548	0.243	0.305		F11	4.31033e-17	1.1381e-12	0.155685	0.125	0.018		AC044810.2	3.28418e-07	0.00867155	-0.179586	0.065	0.158		CU633967.1	2.65914e-07	0.00702119	-0.113919	0.05	0.131
	SPP1	1.72021e-68	4.54203e-64	0.441598	0.303	0.132		ZFPM2-AS1	1.32014e-08	0.000348571	0.254711	0.194	0.108		AC005699.1	4.26102e-49	1.12508e-44	0.208633	0.198	0.093		FNBP1	2.64946e-05	0.699562	0.14118	0.265	0.206		PDGFD	4.39245e-17	1.15978e-12	-0.106669	0.015	0.076		GRIP1	3.54107e-07	0.00934985	0.385465	0.738	0.65		NAV1	2.70955e-07	0.0071543	-0.131962	0.056	0.139
	SEMA6A	1.78892e-68	4.72346e-64	0.316066	0.333	0.155		AFAP1	1.36576e-08	0.000360615	0.153642	0.243	0.148		ADHFE1	4.30052e-49	1.13551e-44	-0.173704	0.083	0.202		TNC	2.71782e-05	0.717613	0.120051	0.091	0.052		TPST2	4.753e-17	1.25498e-12	0.197893	0.212	0.075		KLF5	3.67856e-07	0.00971288	-0.101085	0.029	0.096		SLC12A2	2.72346e-07	0.00719103	-0.143778	0.047	0.125
	SH3BP2	1.79794e-68	4.74729e-64	-0.25914	0.089	0.26		RIPOR3	1.38102e-08	0.000364644	-0.185046	0.137	0.242		MVP	7.20581e-49	1.90262e-44	0.143218	0.167	0.071		SATB2	2.77606e-05	0.73299	0.106274	0.162	0.11		AL356737.2	4.77101e-17	1.25974e-12	0.166032	0.137	0.025		KCNJ1	3.7967e-07	0.0100248	0.269801	0.278	0.129		AKAP13	2.75569e-07	0.00727611	-0.214659	0.326	0.478
	KCNJ15	2.50738e-68	6.62049e-64	-0.518645	0.612	0.776		SLC25A37	1.43955e-08	0.000380098	0.169776	0.299	0.192		SLC16A5	9.16653e-49	2.42033e-44	0.153342	0.186	0.084		PRKACB	2.9506e-05	0.779076	-0.104658	0.185	0.25		ITM2C	5.46532e-17	1.44306e-12	-0.102175	0.022	0.091		SHTN1	4.0298e-07	0.0106403	-0.166714	0.133	0.258		AC013470.2	2.79029e-07	0.00736749	-0.111138	0.057	0.142
	EAF2	6.10211e-68	1.6112e-63	-0.267167	0.126	0.311		ITSN2	1.45253e-08	0.000383525	0.18871	0.416	0.301		TSPAN7	9.90165e-49	2.61443e-44	-0.15156	0.037	0.134		PARP14	3.06369e-05	0.808936	0.102824	0.301	0.236		NPY1R	5.6103e-17	1.48134e-12	0.176575	0.179	0.051		ST3GAL1	4.41348e-07	0.0116534	-0.116425	0.025	0.088		CCSER1	2.92611e-07	0.0077261	0.281004	0.949	0.908
	LINC02208	6.905e-68	1.8232e-63	-0.27788	0.024	0.156		FAS	1.45651e-08	0.000384577	0.114139	0.109	0.047		GCNT2	1.69442e-48	4.47393e-44	-0.247683	0.268	0.415		TDRD3	3.12066e-05	0.823979	-0.125844	0.35	0.416		AOPEP	6.10872e-17	1.61295e-12	-0.279759	0.578	0.702		ARFGEF3	4.72399e-07	0.0124732	-0.105921	0.045	0.125		CPEB3	2.94227e-07	0.00776876	0.320086	0.413	0.282
	FUT8	7.16427e-68	1.89165e-63	0.333343	0.322	0.148		CNNM2	1.55297e-08	0.000410045	-0.160685	0.103	0.203		FAM110B	2.31375e-48	6.10924e-44	0.21153	0.263	0.144		FUT8	3.17539e-05	0.838431	0.106529	0.221	0.163		ANK2	6.28184e-17	1.65866e-12	0.243454	0.318	0.157		MBNL1	5.00221e-07	0.0132078	0.287279	0.577	0.412		AC114812.2	3.04505e-07	0.00804014	-0.12193	0.035	0.104
	CD200	1.10772e-67	2.92482e-63	0.182345	0.159	0.037		DENND1A	1.57306e-08	0.000415352	-0.267577	0.473	0.572		PROX1	3.05218e-48	8.05898e-44	-0.187154	0.069	0.181		PUM1	3.43111e-05	0.905949	0.108081	0.509	0.434		DAPK1	6.81607e-17	1.79971e-12	-0.304964	0.246	0.394		MPC1	5.07645e-07	0.0134039	0.249422	0.307	0.154		RPS11	3.11165e-07	0.008216	-0.115746	0.04	0.113
	FBXO21	1.52463e-67	4.02563e-63	-0.337132	0.194	0.387		NUTM2B-AS1	1.58943e-08	0.000419674	0.181493	0.476	0.359		ACSS3	3.48132e-48	9.19207e-44	-0.239725	0.281	0.427		TMEM131	3.90276e-05	1	-0.1112	0.303	0.373		MFSD4A	6.87498e-17	1.81527e-12	0.208572	0.241	0.098		ZFPM2-AS1	5.24348e-07	0.0138449	-0.129941	0.017	0.071		AC006504.5	3.11719e-07	0.00823063	-0.13909	0.08	0.175
	SLC22A23	1.70196e-67	4.49385e-63	-0.305983	0.125	0.307		DANT2	1.62084e-08	0.000427966	-0.246749	0.6	0.694		ARFGAP3	3.99268e-48	1.05423e-43	0.209183	0.346	0.212		FAM155A	3.94081e-05	1	0.222861	0.288	0.226		AP001831.1	7.33e-17	1.93541e-12	0.223137	0.235	0.095		SNED1	5.47828e-07	0.0144649	-0.134158	0.034	0.104		VEGFA	3.23961e-07	0.00855386	0.293327	0.261	0.136
	MEG8	1.78423e-67	4.71107e-63	0.388004	0.157	0.036		JAZF1	1.63734e-08	0.000432324	0.141423	0.228	0.134		MAP4K4	5.45235e-48	1.43964e-43	0.19682	0.259	0.141		YPEL2	4.15103e-05	1	0.110402	0.271	0.21		STK33	9.60591e-17	2.53634e-12	-0.2575	0.276	0.441		OPTN	5.6517e-07	0.0149228	-0.121752	0.038	0.112		PRKAA2	3.29457e-07	0.00869897	-0.189386	0.183	0.309
	ACE	2.05737e-67	5.43228e-63	-0.207253	0.026	0.16		NUAK2	1.65848e-08	0.000437904	0.166144	0.165	0.086		CHKA	6.81556e-48	1.79958e-43	-0.196621	0.152	0.286		HMCN1	4.65158e-05	1	-0.125782	0.137	0.194		PPP1R13B	1.04094e-16	2.74849e-12	-0.159977	0.08	0.189		RHBG	5.80757e-07	0.0153343	0.229125	0.301	0.146		PUM3	3.30347e-07	0.00872248	-0.170324	0.104	0.208
	ATXN7L1	4.07574e-67	1.07616e-62	-0.329394	0.397	0.597		SCEL	1.7224e-08	0.000454782	0.102075	0.051	0.013		AC093895.1	7.86656e-48	2.07709e-43	-0.179969	0.022	0.108		RBMS3	4.65887e-05	1	0.127647	0.101	0.062		ZNF83	1.19122e-16	3.14529e-12	-0.241002	0.225	0.372		TMEM51-AS1	6.05053e-07	0.0159758	-0.130453	0.048	0.129		SASH1	3.37411e-07	0.00890901	-0.217958	0.157	0.279
	NOS1AP	6.12615e-67	1.61755e-62	0.212238	0.147	0.032		CRYAB	1.76062e-08	0.000464875	0.153985	0.357	0.236		ARL17B	9.2352e-48	2.43846e-43	-0.228679	0.292	0.441		TCF12	4.7605e-05	1	0.112826	0.709	0.657		INPP5J	1.2699e-16	3.35304e-12	0.176675	0.182	0.055		RCAN2	6.3294e-07	0.0167121	-0.174849	0.097	0.208		VOPP1	3.67192e-07	0.00969534	-0.15386	0.121	0.231
	VWA8	7.52271e-67	1.9863e-62	-0.347522	0.505	0.682		ZNF250	1.86447e-08	0.000492296	0.112446	0.132	0.063		CTTNBP2NL	9.91858e-48	2.6189e-43	0.148813	0.169	0.074		SRPK2	4.77778e-05	1	0.126305	0.495	0.431		PWRN1	1.29196e-16	3.41129e-12	-0.118746	0.021	0.088		OBSL1	7.06154e-07	0.0186453	-0.106559	0.032	0.1		EFHC1	3.70943e-07	0.00979437	-0.146107	0.099	0.202
	AF117829.1	8.38348e-67	2.21357e-62	0.341946	0.436	0.248		GIPC2	2.01381e-08	0.000531727	-0.189013	0.254	0.371		AHI1	1.11689e-47	2.94905e-43	0.2281	0.465	0.32		EGF	4.80093e-05	1	-0.231622	0.177	0.232		AHR	1.32079e-16	3.48741e-12	-0.10594	0.031	0.108		KLK1	7.27514e-07	0.0192093	0.189293	0.094	0		DNAH7	3.7181e-07	0.00981726	-0.22728	0.306	0.445
	ACAA1	8.58388e-67	2.26649e-62	-0.254511	0.1	0.273		IGSF11	2.02071e-08	0.000533548	-0.175465	0.116	0.216		SCMH1	1.2379e-47	3.26856e-43	0.249688	0.426	0.287		ANXA2	5.0967e-05	1	0.108614	0.221	0.166		KLHL14	1.32177e-16	3.48999e-12	-0.172232	0.074	0.178		FBXL13	7.29148e-07	0.0192524	-0.144477	0.096	0.204		LHX1	3.79907e-07	0.0100311	-0.162209	0.449	0.602
	GPR89B	9.66031e-67	2.55071e-62	-0.283629	0.161	0.351		HDAC7	2.22479e-08	0.000587434	0.100912	0.162	0.083		RASA2	1.34432e-47	3.54953e-43	0.204531	0.335	0.203		FGF13	5.15066e-05	1	0.194073	0.557	0.502		NFIA	1.41245e-16	3.72944e-12	-0.11407	0.013	0.07		NBEA	7.29915e-07	0.0192727	-0.203101	0.398	0.575		AOPEP	3.95188e-07	0.0104345	-0.252246	0.402	0.549
	SLC7A13	1.06929e-66	2.82336e-62	-0.394683	0.005	0.117		GPR155	2.23084e-08	0.000589031	-0.147052	0.075	0.165		ABHD17C	2.34371e-47	6.18833e-43	-0.19127	0.14	0.272		MAP3K5	5.51494e-05	1	0.108345	0.269	0.207		RNF213-AS1	1.4419e-16	3.8072e-12	0.2445	0.392	0.227		AC023282.1	7.49599e-07	0.0197924	0.285765	0.296	0.146		FAM110B	3.97395e-07	0.0104928	-0.279444	0.402	0.537
	CELSR1	1.07465e-66	2.83751e-62	-0.324455	0.269	0.47		IGF1R	2.341e-08	0.000618118	-0.247571	0.706	0.746		HLA-B	2.47789e-47	6.54261e-43	0.105982	0.099	0.03		HSPG2	5.54739e-05	1	0.10263	0.176	0.126		PPM1H	1.47186e-16	3.8863e-12	-0.292273	0.308	0.452		ACACB	7.6939e-07	0.020315	0.275222	0.369	0.217		LSM7	4.37281e-07	0.011546	-0.108187	0.055	0.136
	ABLIM3	1.21806e-66	3.21617e-62	-0.318391	0.176	0.367		CYB5A	2.42492e-08	0.000640275	-0.146625	0.14	0.247		CREB3L2	3.01745e-47	7.96728e-43	-0.247189	0.224	0.365		UBE2E3	5.64158e-05	1	-0.111539	0.371	0.436		ATP6V0A4	1.54905e-16	4.09012e-12	0.343399	0.604	0.446		NUDT4	8.12774e-07	0.0214605	0.265531	0.262	0.121		MID1	4.53663e-07	0.0119785	-0.265154	0.299	0.442
	ETS1	1.77865e-66	4.69634e-62	0.153205	0.1	0.01		DLGAP4	2.44008e-08	0.000644278	0.138286	0.272	0.171		MCTP2	3.31081e-47	8.74187e-43	0.103248	0.076	0.018		POGZ	5.72373e-05	1	-0.107616	0.401	0.476		SDC2	1.64919e-16	4.35453e-12	-0.177533	0.061	0.159		BACH1	8.17124e-07	0.0215753	-0.192791	0.238	0.388		UBC	4.57861e-07	0.0120894	0.201831	0.199	0.083
	SLC35F5	2.05704e-66	5.4314e-62	0.283395	0.328	0.154		ZNF462	2.49455e-08	0.000658662	0.190794	0.496	0.378		TNRC6A	3.41983e-47	9.02971e-43	-0.243395	0.552	0.675		MYO5B	5.78704e-05	1	0.12868	0.285	0.224		SOX9-AS1	1.79637e-16	4.74314e-12	-0.111641	0.026	0.097		HMGA2-AS1	8.24964e-07	0.0217823	0.182114	0.156	0.038		LINC01138	4.65637e-07	0.0122947	-0.163932	0.162	0.285
	PTPN14	2.61613e-66	6.90762e-62	0.316662	0.388	0.204		BAZ1A	2.51438e-08	0.000663898	0.169995	0.261	0.165		ZFAND5	3.80494e-47	1.00466e-42	-0.216976	0.159	0.291		FCHSD2	5.85266e-05	1	0.132377	0.395	0.332		CCDC57	2.00716e-16	5.2997e-12	-0.191969	0.157	0.293		TBC1D4	8.41846e-07	0.0222281	0.276712	0.483	0.321		ITM2C	4.72638e-07	0.0124795	-0.110355	0.039	0.11
	AC005208.1	2.74536e-66	7.24884e-62	-0.345225	0.221	0.418		TEAD1	2.5482e-08	0.000672826	0.209667	0.654	0.55		PRKAR1B	8.31775e-47	2.19622e-42	-0.156545	0.055	0.159		KCNJ3	5.91225e-05	1	-0.100408	0.136	0.192		FAT1	2.00913e-16	5.30491e-12	-0.225302	0.172	0.308		MAP3K1	8.7025e-07	0.0229781	-0.249211	0.288	0.442		TMEM72	4.8199e-07	0.0127265	0.210749	0.262	0.134
	MOGAT1	3.00216e-66	7.92689e-62	-0.24858	0.03	0.166		BIRC6	2.55474e-08	0.000674555	0.171173	0.608	0.482		CYP24A1	9.08293e-47	2.39826e-42	0.109667	0.036	0.002		FAM110B	6.11843e-05	1	0.132482	0.299	0.24		SPAG16	2.32762e-16	6.14584e-12	-0.323544	0.328	0.482		CHSY1	8.78477e-07	0.0231953	-0.196214	0.163	0.296		TOX3	5.16083e-07	0.0136267	0.343363	0.51	0.401
	UPP2	3.66384e-66	9.674e-62	-0.379761	0.082	0.244		ADD3	2.55858e-08	0.000675568	-0.206886	0.258	0.369		KCNC4	1.00888e-46	2.66385e-42	0.147539	0.188	0.087		SCMH1	6.41174e-05	1	0.113427	0.469	0.398		GCGR	2.36986e-16	6.25737e-12	0.18282	0.179	0.055		SCN3A	9.00784e-07	0.0237843	-0.360013	0.437	0.567		PLCL1	5.52569e-07	0.01459	0.313924	0.226	0.104
	DLGAP2	3.67461e-66	9.70244e-62	-0.234422	0.038	0.179		PDK4	2.61411e-08	0.000690229	-0.243453	0.034	0.107		PAPLN	1.19353e-46	3.15141e-42	0.138675	0.142	0.057		CCNL1	6.47238e-05	1	0.10367	0.245	0.187		ATP9B	2.83427e-16	7.4836e-12	0.267407	0.608	0.463		SLC9C1	9.22672e-07	0.0243622	-0.171866	0.097	0.204		KIAA0825	6.00483e-07	0.0158552	-0.212852	0.192	0.318
	LRRC49	4.08338e-66	1.07818e-61	0.173708	0.12	0.019		ST7	2.66966e-08	0.000704898	-0.211079	0.432	0.536		ACTG1	1.27559e-46	3.36808e-42	0.14509	0.133	0.051		STK3	6.53488e-05	1	0.107541	0.567	0.507		PPFIBP2	3.3952e-16	8.96469e-12	-0.121049	0.037	0.117		PDE8A	9.35559e-07	0.0247025	0.304227	0.523	0.379		COL4A6	6.11371e-07	0.0161426	-0.326919	0.31	0.451
	NOTCH2	4.24451e-66	1.12072e-61	0.22851	0.23	0.081		ZHX2	2.67065e-08	0.000705159	0.19196	0.483	0.368		AL359915.1	1.49953e-46	3.95936e-42	-0.137273	0.023	0.108		CYFIP2	6.66866e-05	1	-0.134011	0.254	0.314		IVNS1ABP	3.73089e-16	9.85105e-12	0.291019	0.634	0.482		A4GALT	9.44895e-07	0.024949	-0.119069	0.056	0.142		GPRIN3	6.22037e-07	0.0164243	-0.181709	0.105	0.208
	ACSS2	6.27653e-66	1.65726e-61	-0.303855	0.225	0.428		VNN1	2.8776e-08	0.000759803	0.21832	0.08	0.03		LRRIQ1	1.53484e-46	4.0526e-42	0.194524	0.253	0.137		SIM2	6.7542e-05	1	0.129205	0.656	0.618		ADAMTS9	3.76076e-16	9.92991e-12	-0.33441	0.541	0.669		PAQR5	9.52066e-07	0.0251384	0.287447	0.458	0.304		IL1RAPL2	6.25961e-07	0.0165279	0.337256	0.375	0.228
	TTC39C	7.8126e-66	2.06284e-61	0.132481	0.09	0.006		BX890604.2	3.13914e-08	0.000828858	0.132367	0.29	0.185		SREBF2	1.89063e-46	4.99202e-42	-0.219439	0.231	0.375		SMURF1	6.76934e-05	1	0.103399	0.334	0.268		ABCA6	3.80404e-16	1.00442e-11	0.208736	0.209	0.077		CRYBG1	1.00674e-06	0.0265819	0.31125	0.615	0.492		SLC35B3	6.30548e-07	0.016649	-0.128881	0.069	0.157
	AC099788.1	1.29806e-65	3.4274e-61	0.166843	0.108	0.014		PARP14	3.14199e-08	0.000829611	0.150076	0.313	0.205		TNS3	2.11623e-46	5.5877e-42	0.294433	0.522	0.394		AC090579.1	6.83368e-05	1	0.103141	0.351	0.283		GMDS	3.90937e-16	1.03223e-11	-0.223015	0.222	0.37		PPP1CB	1.00885e-06	0.0266377	-0.238798	0.206	0.342		SPAG1	6.32372e-07	0.0166971	-0.131009	0.102	0.205
	DYNC2LI1	1.3807e-65	3.6456e-61	0.244392	0.235	0.086		KCNJ3	3.14238e-08	0.000829715	-0.17385	0.152	0.262		SLC22A2	2.37991e-46	6.28392e-42	-0.163786	0.057	0.16		TJP2	7.28747e-05	1	0.178524	0.394	0.333		GSDME	4.88424e-16	1.28963e-11	0.16712	0.142	0.032		TUSC3	1.09913e-06	0.0290213	-0.151092	0.152	0.283		PGAP1	6.44461e-07	0.0170164	0.233155	0.272	0.145
	LINC01622	1.90131e-65	5.02023e-61	-0.436648	0.321	0.521		AFMID	3.18463e-08	0.00084087	-0.144305	0.064	0.148		STARD8	2.85804e-46	7.54637e-42	-0.144011	0.042	0.139		PLEKHH2	7.42795e-05	1	0.16084	0.467	0.413		EFHC1	4.95092e-16	1.30724e-11	-0.154264	0.088	0.198		CYP51A1	1.18121e-06	0.0311887	0.185395	0.134	0.025		AC105916.1	6.60962e-07	0.017452	-0.113919	0.05	0.128
	PDZD3	2.19441e-65	5.79413e-61	-0.218439	0.063	0.218		TGIF1	3.18677e-08	0.000841436	0.102357	0.163	0.085		SPATA17	5.38837e-46	1.42274e-41	0.151367	0.188	0.088		DDX5	7.6665e-05	1	-0.111994	0.422	0.491		PRLR	5.03084e-16	1.32834e-11	0.17287	0.136	0.028		LINC02615	1.18632e-06	0.0313237	-0.162923	0.095	0.2		PHLDA2	7.13464e-07	0.0188383	0.170604	0.087	0.009
	CASK	2.40633e-65	6.35366e-61	0.309142	0.329	0.156		BACE2	3.30072e-08	0.000871522	0.131555	0.184	0.102		SWAP70	7.22504e-46	1.9077e-41	0.153833	0.204	0.1		LHFPL3	7.9926e-05	1	-0.114838	0.164	0.22		CPXM2	5.14428e-16	1.3583e-11	0.224781	0.446	0.272		PCED1B	1.21158e-06	0.0319905	-0.160885	0.077	0.175		PLEKHG3	7.70389e-07	0.0203413	0.245445	0.302	0.175
	RNF213	3.03284e-65	8.00791e-61	0.354886	0.444	0.254		AL359232.1	3.4343e-08	0.000906794	-0.20002	0.132	0.235		AC008014.1	1.03217e-45	2.72535e-41	-0.26301	0.345	0.495		LRRIQ1	8.2886e-05	1	0.12408	0.29	0.23		PHLDB1	5.31976e-16	1.40463e-11	-0.162532	0.089	0.199		FAM107A	1.26835e-06	0.0334896	-0.146403	0.065	0.154		HSP90AB1	7.90499e-07	0.0208723	0.217783	0.188	0.077
	FMO5	3.77196e-65	9.95947e-61	-0.319354	0.082	0.242		EYA2	3.73583e-08	0.000986409	-0.155769	0.077	0.165		THSD7B	1.20721e-45	3.1875e-41	-0.185359	0.055	0.157		SH3RF1	8.33412e-05	1	-0.143871	0.397	0.455		STK32B	6.08239e-16	1.60599e-11	0.275827	0.411	0.243		HIVEP3	1.28647e-06	0.033968	-0.214485	0.134	0.25		UGCG	8.04085e-07	0.0212311	-0.171365	0.091	0.187
	RASAL2	3.84992e-65	1.01653e-60	0.405874	0.519	0.337		SLC20A2	3.80024e-08	0.00100342	0.214636	0.282	0.184		IGFBP7	1.55866e-45	4.11549e-41	0.418365	0.574	0.463		N4BP2L2	8.8123e-05	1	-0.110624	0.643	0.698		PTPN14	6.76854e-16	1.78717e-11	-0.297672	0.353	0.496		NELL1	1.4005e-06	0.0369789	0.241692	0.146	0.033		ACTR3B	8.33339e-07	0.0220035	-0.157552	0.101	0.199
	P4HA1	4.31264e-65	1.13871e-60	-0.377943	0.161	0.343		CCSER1	3.85836e-08	0.00101876	-0.202933	0.424	0.56		NINL	1.6129e-45	4.25869e-41	-0.219574	0.304	0.451		NT5DC1	9.02742e-05	1	-0.106441	0.222	0.283		TTC39A	7.2501e-16	1.91432e-11	-0.100554	0.029	0.102		RPS6KA2	1.44857e-06	0.0382481	-0.160667	0.167	0.3		MAPK6	8.61531e-07	0.0227479	0.181783	0.172	0.065
	COL19A1	1.03906e-64	2.74354e-60	-0.285392	0.103	0.275		LRRC7	3.95771e-08	0.00104499	-0.14101	0.057	0.14		NEBL	1.68232e-45	4.442e-41	-0.212052	0.448	0.598		BMPR2	9.09221e-05	1	0.114581	0.413	0.346		ACTG1	7.70403e-16	2.03417e-11	-0.117271	0.031	0.105		AC026167.1	1.45645e-06	0.0384562	0.287023	0.163	0.046		BRINP3	8.70683e-07	0.0229895	-0.203216	0.144	0.261
	HHAT	2.17179e-64	5.73439e-60	0.165808	0.13	0.024		SMAD3	4.23662e-08	0.00111864	0.21326	0.403	0.293		2002-03-01	2.04367e-45	5.3961e-41	-0.168103	0.097	0.214		GLCCI1	9.26644e-05	1	-0.183375	0.385	0.442		NBEA	8.69263e-16	2.2952e-11	-0.271266	0.363	0.515		MYO5A	1.62782e-06	0.0429809	0.269901	0.463	0.312		XRCC5	8.7555e-07	0.023118	-0.168782	0.239	0.377
	SGK3	4.45048e-64	1.17511e-59	-0.305758	0.34	0.543		SLC16A10	4.23859e-08	0.00111916	-0.1641	0.15	0.256		BMP6	2.15757e-45	5.69684e-41	-0.252792	0.11	0.229		CLMN	9.42432e-05	1	0.132647	0.71	0.659		ITPR2	1.10647e-15	2.92152e-11	0.255069	0.672	0.526		PTAFR	1.65366e-06	0.0436633	-0.100379	0.038	0.108		RAB11A	8.93242e-07	0.0235852	-0.170501	0.159	0.276
	AC010210.1	5.49822e-64	1.45175e-59	-0.258617	0.091	0.255		HKDC1	4.25515e-08	0.00112353	0.206464	0.259	0.163		EFHD1	2.18244e-45	5.76252e-41	-0.252615	0.358	0.504		EZR	9.80739e-05	1	-0.102468	0.258	0.324		SLC36A4	1.74844e-15	4.61659e-11	0.219812	0.353	0.198		MAGI3	1.66451e-06	0.0439498	0.356762	0.539	0.425		AC011043.1	8.99702e-07	0.0237557	-0.132459	0.091	0.187
	SLC26A6	7.78119e-64	2.05455e-59	-0.172229	0.018	0.141		BHLHE40	4.26959e-08	0.00112734	0.136013	0.157	0.082		XPA	2.50299e-45	6.60889e-41	-0.16845	0.111	0.233		DENND5B	9.99225e-05	1	-0.130014	0.176	0.229		PDE1C	1.77151e-15	4.67749e-11	-0.13597	0.034	0.109		AL008633.1	1.67612e-06	0.0442563	-0.174964	0.229	0.383		HKDC1	9.08931e-07	0.0239994	-0.145608	0.055	0.134
	TNS1	1.39185e-63	3.67503e-59	-0.31592	0.364	0.571		GCC2	4.27905e-08	0.00112984	0.21306	0.44	0.333		FHOD3	4.09792e-45	1.08201e-40	-0.247184	0.439	0.579		AAK1	0.000102422	1	0.120855	0.472	0.406		C11orf49	1.81255e-15	4.78586e-11	-0.238762	0.298	0.45		MID1	1.67897e-06	0.0443316	-0.327143	0.384	0.525		AZIN1	9.25573e-07	0.0244388	0.197533	0.222	0.104
	COL23A1	1.39485e-63	3.68297e-59	0.287981	0.215	0.074		PAX2	4.37653e-08	0.00115558	-0.178914	0.268	0.381		LINC00113	4.64973e-45	1.22771e-40	-0.117786	0.008	0.079		DST	0.000105085	1	0.124241	0.589	0.527		MAPK10	1.96624e-15	5.19167e-11	-0.265621	0.687	0.78		MUC1	1.69727e-06	0.0448147	-0.152686	0.1	0.204		DNM2	9.29056e-07	0.0245308	0.374142	0.499	0.392
	PON2	1.77503e-63	4.68679e-59	0.204286	0.203	0.066		TMEM267	4.42324e-08	0.00116791	0.11153	0.153	0.079		NPR3	5.13579e-45	1.35605e-40	-0.142612	0.051	0.15		SPIDR	0.000105636	1	0.116915	0.639	0.568		LINC02672	2.01683e-15	5.32525e-11	0.165492	0.116	0.018		ABTB2	1.70554e-06	0.0450331	0.359631	0.49	0.354		PON2	9.42728e-07	0.0248918	-0.148	0.122	0.228
	CXADR	1.92041e-63	5.07065e-59	0.153557	0.126	0.023		DGKG	4.50113e-08	0.00118848	-0.169043	0.055	0.135		SYT7	5.44159e-45	1.4368e-40	-0.111939	0.013	0.088		CCDC146	0.000111711	1	-0.100417	0.185	0.241		LRRC4C	2.01974e-15	5.33292e-11	-0.114538	0.027	0.095		MNS1	1.80168e-06	0.0475715	-0.124091	0.079	0.175		TBC1D7	9.44739e-07	0.0249449	-0.12918	0.089	0.184
	ITPR3	2.66767e-63	7.04372e-59	0.122031	0.083	0.005		PTBP2	4.53842e-08	0.00119832	0.156723	0.475	0.358		VTCN1	6.14069e-45	1.62139e-40	0.171971	0.145	0.06		ARID5B	0.000112828	1	0.199536	0.478	0.425		LIMS1	2.03487e-15	5.37288e-11	-0.268777	0.295	0.436		AQP2	1.85495e-06	0.0489781	0.234582	0.162	0.046		RASGRP1	9.45524e-07	0.0249656	-0.169447	0.217	0.347
	IP6K3	2.82234e-63	7.45212e-59	-0.173118	0.016	0.135		STON2	4.68264e-08	0.0012364	-0.210478	0.259	0.37		KCNK1	8.67977e-45	2.29181e-40	-0.17468	0.083	0.194		BBX	0.000114	1	0.102167	0.507	0.44		PDE8A	2.43488e-15	6.42907e-11	0.264324	0.614	0.467		BAZ1A	1.8691e-06	0.0493517	-0.103453	0.06	0.146		LINC02062	9.60139e-07	0.0253515	-0.122436	0.048	0.122
	AL157931.1	3.08071e-63	8.1343e-59	0.18858	0.147	0.033		SLC35F5	4.89747e-08	0.00129313	0.161772	0.418	0.301		CHCHD3	8.74893e-45	2.31007e-40	-0.220552	0.349	0.497		AL008633.1	0.000119571	1	0.11206	0.331	0.264		DYNC2H1	2.96603e-15	7.83152e-11	-0.284612	0.646	0.778		CALM2	1.90431e-06	0.0502815	-0.126702	0.071	0.162		RPS6KA2	9.64376e-07	0.0254634	-0.14614	0.162	0.285
	NFAT5	4.32458e-63	1.14186e-58	0.374117	0.536	0.357		OCLN	5.07228e-08	0.00133928	0.122652	0.202	0.116		ZNF83	9.1101e-45	2.40543e-40	0.235224	0.443	0.312		CPEB2	0.000123504	1	0.185809	0.64	0.613		MYLK	3.19673e-15	8.44063e-11	-0.164816	0.073	0.171		FAAH2	1.90733e-06	0.0503611	-0.243783	0.325	0.475		SH3RF1	1.02157e-06	0.0269737	-0.263646	0.439	0.567
	SLC39A5	4.33402e-63	1.14435e-58	-0.197021	0.044	0.186		PPP1R16B	5.15566e-08	0.0013613	-0.152186	0.062	0.144		GPAT3	9.82432e-45	2.59401e-40	-0.225331	0.083	0.194		COL4A4	0.000124675	1	-0.119085	0.494	0.559		MAP4K3-DT	3.5608e-15	9.40192e-11	0.241153	0.517	0.354		PRKCQ	1.9874e-06	0.0524753	-0.128374	0.071	0.162		ELF5	1.06984e-06	0.028248	0.18526	0.207	0.092
	ANKRD36	5.0816e-63	1.34175e-58	0.232951	0.253	0.1		AC018467.1	5.16949e-08	0.00136495	-0.241147	0.312	0.422		PARP9	1.01489e-44	2.67973e-40	0.111302	0.114	0.04		GTF2I	0.000127081	1	0.113872	0.537	0.479		STAT3	3.83733e-15	1.01321e-10	-0.236342	0.321	0.474		SYNPR	2.1028e-06	0.0555224	-0.129125	0.012	0.054		TMTC2	1.11082e-06	0.0293302	-0.311524	0.758	0.843
	OSBPL6	5.23436e-63	1.38208e-58	-0.260474	0.106	0.275		EEA1	5.2212e-08	0.0013786	0.134145	0.308	0.201		MSI2	1.77483e-44	4.68625e-40	-0.217886	0.731	0.835		PRH1	0.000134937	1	-0.11648	0.623	0.679		CLDN4	5.42228e-15	1.4317e-10	-0.101552	0.023	0.087		CD58	2.1247e-06	0.0561004	-0.119069	0.053	0.133		FSTL4	1.14998e-06	0.0303641	0.193321	0.115	0.027
	CCDC178	5.53004e-63	1.46015e-58	0.215576	0.145	0.033		NDRG1	5.40793e-08	0.00142791	-0.151933	0.1	0.193		PPM1E	2.29538e-44	6.06072e-40	-0.27543	0.121	0.241		GBE1	0.000136993	1	-0.115918	0.303	0.363		STK3	6.21973e-15	1.64226e-10	-0.263335	0.422	0.57		VPS13C	2.16931e-06	0.0572785	-0.231199	0.392	0.537		LRRN2	1.18602e-06	0.0313157	-0.11349	0.059	0.139
	SPATS2L	7.3971e-63	1.95313e-58	0.377778	0.672	0.513		FBXL2	5.68269e-08	0.00150046	0.168691	0.382	0.272		CTIF	2.63538e-44	6.95846e-40	-0.191027	0.157	0.287		COBLL1	0.000138103	1	-0.107776	0.857	0.89		WWOX	6.32803e-15	1.67085e-10	-0.320893	0.688	0.786		DPH6	2.27297e-06	0.0600156	-0.220029	0.371	0.533		TEX9	1.19455e-06	0.0315408	-0.149276	0.14	0.252
	SH3YL1	7.88986e-63	2.08324e-58	-0.344718	0.313	0.504		TMSB10	5.93127e-08	0.00156609	0.134084	0.183	0.101		AL645568.1	2.72117e-44	7.18498e-40	-0.202327	0.174	0.306		PDE10A	0.000139597	1	-0.327463	0.215	0.266		INSR	6.75046e-15	1.78239e-10	0.259771	0.396	0.247		PHACTR1	2.36908e-06	0.0625532	-0.154988	0.112	0.221		CDCP1	1.24398e-06	0.0328461	-0.127866	0.071	0.157
	MYO1E	8.11016e-63	2.14141e-58	0.276976	0.258	0.105		SAMD5	6.18501e-08	0.00163309	-0.164047	0.15	0.254		MPP7	2.74954e-44	7.2599e-40	-0.206456	0.152	0.278		ASTN2	0.000140399	1	-0.120359	0.461	0.53		LYN	6.75627e-15	1.78393e-10	-0.106197	0.036	0.112		RALGAPA2	2.48546e-06	0.0656261	-0.229767	0.291	0.433		FANK1	1.2975e-06	0.0342592	-0.131437	0.159	0.279
	PCTP	8.80448e-63	2.32473e-58	-0.224181	0.063	0.214		SUPT3H	6.34549e-08	0.00167546	0.210146	0.489	0.38		LINC02672	3.27347e-44	8.64328e-40	-0.14516	0.017	0.095		AGFG1	0.000165226	1	0.103398	0.387	0.325		RASEF	6.84533e-15	1.80744e-10	-0.119209	0.039	0.116		AC011447.3	2.5637e-06	0.067692	-0.184971	0.097	0.196		BTBD7	1.30031e-06	0.0343333	-0.241166	0.332	0.472
	SYTL2	1.12071e-62	2.95912e-58	0.403897	0.248	0.102		AIF1L	7.07575e-08	0.00186828	0.107164	0.165	0.088		MFAP3L	3.38056e-44	8.92603e-40	-0.166447	0.095	0.21		ARHGEF38	0.000169355	1	-0.164841	0.66	0.715		SBNO2	6.87133e-15	1.81431e-10	-0.114713	0.046	0.128		ZFHX3	2.59356e-06	0.0684804	-0.221503	0.271	0.417		CHMP2B	1.30285e-06	0.0344003	0.129963	0.119	0.03
	LINC01948	1.13038e-62	2.98466e-58	0.175354	0.152	0.037		STPG2	7.1629e-08	0.00189129	-0.204602	0.22	0.328		ZBTB16	4.48895e-44	1.18526e-39	-0.362208	0.325	0.452		COL27A1	0.000176267	1	0.108383	0.252	0.199		MAML3	7.06479e-15	1.86539e-10	-0.262969	0.262	0.407		CDCP1	2.82442e-06	0.0745759	-0.108513	0.049	0.125		HERC1	1.30444e-06	0.0344425	0.279643	0.438	0.309
	NPNT	1.18346e-62	3.12482e-58	0.262013	0.133	0.027		RGN	7.20921e-08	0.00190352	-0.178886	0.142	0.24		CDKL2	7.82773e-44	2.06683e-39	0.144679	0.185	0.088		GNB1	0.000179477	1	0.103547	0.282	0.225		WWC1	7.44701e-15	1.96631e-10	-0.330726	0.303	0.441		SLC13A1	2.8269e-06	0.0746415	-0.252352	0.015	0.062		UTY	1.34442e-06	0.0354982	0.258709	0.421	0.273
	LRAT	1.18731e-62	3.13498e-58	0.191501	0.149	0.035		LINC02147	7.23373e-08	0.00190999	-0.151748	0.033	0.103		PLCXD2	1.02908e-43	2.71718e-39	-0.258578	0.434	0.577		PTGER3	0.000199337	1	-0.145721	0.14	0.188		FDX1	7.76136e-15	2.04931e-10	0.193842	0.21	0.084		NR1H4	2.82887e-06	0.0746935	-0.163868	0.085	0.179		MALAT1	1.40009e-06	0.0369679	0.155564	0.999	1
	SOX6	1.21861e-62	3.21761e-58	0.402333	0.747	0.622		SPATS2L	7.23752e-08	0.001911	0.19016	0.754	0.647		SLC4A8	1.29992e-43	3.43231e-39	-0.153406	0.058	0.158		PPM1L	0.00020179	1	-0.106389	0.139	0.189		FAM184A	7.79498e-15	2.05819e-10	0.219659	0.32	0.173		ARHGAP44	2.92055e-06	0.0771141	-0.194298	0.154	0.271		DNAH9	1.47698e-06	0.0389981	-0.10336	0.041	0.11
	ADRA1B	1.22305e-62	3.22935e-58	-0.220896	0.047	0.188		GPC4	7.40639e-08	0.00195558	0.216476	0.338	0.235		AC092535.4	1.54005e-43	4.06635e-39	-0.226686	0.189	0.318		RORA	0.000206347	1	-0.138786	0.74	0.79		LINC01485	8.1814e-15	2.16022e-10	0.131512	0.092	0.007		LINC02649	3.0399e-06	0.0802655	-0.167472	0.153	0.275		TBC1D12	1.48617e-06	0.0392409	0.217134	0.332	0.199
	MIR29B2CHG	1.31611e-62	3.47506e-58	-0.250611	0.128	0.304		DGLUCY	7.71548e-08	0.0020372	-0.177418	0.204	0.312		BCKDHB	1.64105e-43	4.33304e-39	-0.246592	0.324	0.459		MTX2	0.000215702	1	-0.1011	0.289	0.348		RREB1	8.42816e-15	2.22537e-10	-0.207069	0.189	0.323		CNKSR3	3.05889e-06	0.0807669	-0.205205	0.232	0.371		PLEKHA1	1.48976e-06	0.0393356	-0.180528	0.221	0.353
	GLS	1.44755e-62	3.82211e-58	0.553754	0.673	0.529		ARHGAP6	7.72641e-08	0.00204008	-0.247581	0.537	0.635		NEDD4L	1.72739e-43	4.56099e-39	-0.219839	0.616	0.737		TRABD2B	0.000222319	1	0.183494	0.367	0.311		BTBD7	8.93241e-15	2.35851e-10	-0.243581	0.304	0.443		AC023590.1	3.06173e-06	0.080842	-0.153932	0.132	0.246		STK39	1.54125e-06	0.0406951	-0.161716	0.178	0.3
	C3orf67	1.86277e-62	4.91846e-58	0.148974	0.102	0.013		SPTAN1	7.99563e-08	0.00211117	0.120328	0.266	0.167		USP2-AS1	1.74913e-43	4.61841e-39	-0.14873	0.032	0.119		MYO9A	0.000226559	1	0.125987	0.835	0.819		DIP2C	9.84983e-15	2.60075e-10	-0.25619	0.285	0.431		TRIO	3.13595e-06	0.0828017	-0.257135	0.449	0.604		MKNK2	1.58748e-06	0.0419159	0.217759	0.187	0.08
	MYO1B	2.06528e-62	5.45316e-58	0.155562	0.101	0.012		TRAM1	8.30953e-08	0.00219405	0.121901	0.191	0.109		CMC1	2.75644e-43	7.27811e-39	-0.211339	0.227	0.362		PAM	0.00023803	1	0.113904	0.547	0.483		SLC35B4	1.05068e-14	2.77421e-10	0.214732	0.321	0.174		NEDD4L	3.37345e-06	0.0890726	0.358606	0.688	0.596		C4orf19	1.59266e-06	0.0420526	-0.301451	0.49	0.605
	HAGH	2.20437e-62	5.82041e-58	-0.251831	0.119	0.292		KATNBL1	8.63611e-08	0.00228028	0.131765	0.282	0.182		CDH18	3.28877e-43	8.68366e-39	-0.13508	0.019	0.097		RALGAPA2	0.000241788	1	0.106116	0.556	0.494		CAMTA1	1.05942e-14	2.79729e-10	-0.224834	0.309	0.463		AC006299.1	3.43108e-06	0.0905942	-0.109391	0.044	0.117		ENTPD1-AS1	1.59322e-06	0.0420675	-0.20149	0.235	0.365
	CFAP54	3.18614e-62	8.41268e-58	0.136224	0.094	0.009		SLC12A6	8.63953e-08	0.00228118	-0.170913	0.176	0.28		AC138627.1	3.48837e-43	9.21071e-39	-0.176309	0.055	0.154		TJP1	0.000257302	1	0.100379	0.391	0.328		LINC01799	1.13171e-14	2.98816e-10	0.147303	0.089	0.006		AC087379.2	3.53914e-06	0.0934474	0.241486	0.092	0.004		ACO2	1.67465e-06	0.0442173	0.172045	0.197	0.086
	IL18	3.80169e-62	1.0038e-57	0.157871	0.114	0.018		FTX	8.84963e-08	0.00233666	-0.212353	0.9	0.927		SHLD2	4.58738e-43	1.21125e-38	-0.210735	0.236	0.373		AF233439.1	0.000264444	1	-0.177774	0.17	0.222		UNC13B	1.15507e-14	3.04986e-10	0.231199	0.453	0.301		AC117386.2	3.56894e-06	0.0942344	0.323345	0.188	0.071		KCNS3	1.67861e-06	0.0443221	-0.115479	0.052	0.128
	PLCE1	4.22257e-62	1.11493e-57	0.183767	0.123	0.022		AL078604.4	9.00036e-08	0.00237646	0.142936	0.184	0.105		IL7	8.953e-43	2.36395e-38	0.177053	0.227	0.121		LINC01278	0.000277898	1	-0.117279	0.352	0.41		CPEB3	1.16717e-14	3.0818e-10	0.252165	0.57	0.42		ROBO1	3.67229e-06	0.096963	-0.171514	0.14	0.258		EXOG	1.68688e-06	0.0445405	-0.101415	0.05	0.125
	KCTD1	5.62804e-62	1.48603e-57	0.19268	0.159	0.041		SLC22A11	9.15739e-08	0.00241792	-0.114116	0.044	0.118		DDX60	1.07096e-42	2.82775e-38	0.12271	0.128	0.05		KCNIP4	0.000319776	1	0.119168	0.946	0.946		MIR503HG	1.26955e-14	3.35211e-10	0.181346	0.195	0.073		PRKN	3.69587e-06	0.0975857	0.318984	0.721	0.629		MIR181A2HG	1.7213e-06	0.0454492	-0.141513	0.079	0.166
	PGGHG	5.96378e-62	1.57468e-57	0.139974	0.1	0.012		HIF1A-AS3	9.29836e-08	0.00245514	0.130128	0.153	0.081		CLMN	1.07864e-42	2.84804e-38	0.256641	0.678	0.559		PDE3A	0.000321216	1	-0.129772	0.087	0.128		UBR3	1.29124e-14	3.40939e-10	0.238066	0.543	0.39		AF165147.1	3.72632e-06	0.0983898	-0.12502	0.065	0.15		PHACTR2	1.72274e-06	0.0454871	-0.196231	0.194	0.318
	HPCAL1	7.08368e-62	1.87038e-57	-0.291106	0.17	0.354		KMT2C	9.38941e-08	0.00247918	0.187909	0.626	0.509		CLYBL	2.58283e-42	6.8197e-38	-0.198568	0.204	0.338		ARHGEF10L	0.000350176	1	0.100129	0.3	0.245		FAM110B	1.3058e-14	3.44782e-10	-0.216173	0.13	0.247		CTTNBP2NL	3.82096e-06	0.100889	-0.169432	0.086	0.179		RBBP6	1.7503e-06	0.0462149	-0.138132	0.103	0.202
	SERPINF2	7.97846e-62	2.10663e-57	-0.226148	0.062	0.211		SIPA1L3	9.50759e-08	0.00251038	0.244253	0.467	0.365		DECR1	2.85705e-42	7.54376e-38	-0.186219	0.165	0.292		PCDH9	0.000365185	1	-0.166521	0.604	0.652		SIK2	1.31758e-14	3.47895e-10	0.305824	0.441	0.293		MTHFD1L	3.87731e-06	0.102377	-0.163833	0.183	0.312		AL391117.1	1.77122e-06	0.0467673	-0.153992	0.052	0.128
	HRH1	1.04874e-61	2.76909e-57	0.136541	0.075	0.003		ZHX3	9.85294e-08	0.00260157	-0.211144	0.237	0.346		SEMA3C	3.05164e-42	8.05756e-38	0.195946	0.16	0.073		PTPN1	0.000366181	1	0.134549	0.215	0.165		SHTN1	1.321e-14	3.48797e-10	-0.199779	0.159	0.283		BX890604.2	3.9508e-06	0.104317	-0.108702	0.067	0.154		ZNRF2	1.77206e-06	0.0467894	-0.286072	0.208	0.32
	ODF2L	1.22997e-61	3.24762e-57	0.218975	0.247	0.097		CMBL	9.92739e-08	0.00262123	-0.102943	0.028	0.094		PIK3R1	3.08486e-42	8.14526e-38	-0.217897	0.201	0.331		ZRANB2-AS2	0.000386166	1	-0.117598	0.237	0.293		FOSL2	1.37593e-14	3.633e-10	-0.155743	0.075	0.171		ZNF385D	3.95869e-06	0.104525	-0.234559	0.129	0.238		MYH9	1.84705e-06	0.0487694	0.23324	0.235	0.119
	CD226	1.47725e-61	3.90053e-57	-0.187762	0.019	0.138		MAP4	9.94533e-08	0.00262597	0.196666	0.55	0.436		CHL1	3.48511e-42	9.20209e-38	0.278885	0.405	0.282		LIMS1	0.0003917	1	0.109102	0.373	0.316		TENM1	1.44967e-14	3.82771e-10	-0.158814	0.071	0.166		NPR3	3.97335e-06	0.104912	0.146205	0.098	0.008		ACACB	1.9236e-06	0.0507908	0.217314	0.351	0.217
	EVA1A	2.18345e-61	5.76519e-57	-0.28141	0.192	0.38		HIVEP2	9.97753e-08	0.00263447	0.230234	0.343	0.244		COL27A1	5.67338e-42	1.498e-37	0.159629	0.219	0.115		USP34	0.000396467	1	0.100992	0.661	0.604		NUDT4	1.49878e-14	3.95738e-10	0.280944	0.396	0.247		SLC35B3	4.029e-06	0.106382	-0.126871	0.058	0.138		HGD	1.93627e-06	0.0511254	-0.106176	0.045	0.116
	INPP4B	3.79907e-61	1.00311e-56	0.176618	0.134	0.028		KCNH8	1.00625e-07	0.0026569	0.115291	0.124	0.06		BCAS1	7.24715e-42	1.91354e-37	0.106425	0.088	0.027		FAM135A	0.000410383	1	0.129378	0.477	0.421		AC022424.2	1.66639e-14	4.39994e-10	-0.128791	0.05	0.134		GRAMD1A	4.10736e-06	0.108451	-0.10398	0.04	0.108		MVD	1.99779e-06	0.0527496	0.129628	0.092	0.015
	CDHR3	4.18629e-61	1.10535e-56	-0.315529	0.466	0.655		VEZT	1.05103e-07	0.00277513	0.15826	0.328	0.225		PTPRG	8.16647e-42	2.15627e-37	0.290336	0.867	0.791		TMTC2	0.000411244	1	-0.132277	0.352	0.413		SPIDR	1.90296e-14	5.02458e-10	-0.27123	0.449	0.59		DPH6-DT	4.19708e-06	0.11082	0.311344	0.364	0.217		VASN	2.00126e-06	0.0528412	0.196391	0.155	0.056
	LINC02715	4.39725e-61	1.16105e-56	-0.194154	0.003	0.104		FAM135A	1.07162e-07	0.0028295	0.176436	0.4	0.289		PDE4DIP	1.06941e-41	2.82366e-37	-0.212361	0.344	0.486		GMDS	0.000422102	1	0.104061	0.463	0.407		LINC00645	1.90419e-14	5.02782e-10	0.401178	0.385	0.246		PDZRN3	4.20337e-06	0.110986	0.345356	0.378	0.246		LEPR	2.01415e-06	0.0531816	-0.148072	0.085	0.175
	MBD5	5.60028e-61	1.4787e-56	0.38556	0.778	0.679		RASEF	1.07981e-07	0.00285112	0.15165	0.24	0.15		PDZRN3	1.15483e-41	3.0492e-37	-0.22408	0.178	0.306		MKLN1	0.00042273	1	0.116156	0.656	0.62		ACSL3	1.94732e-14	5.1417e-10	0.220948	0.325	0.18		SCML1	4.40572e-06	0.116329	0.200664	0.239	0.108		MTHFD1L	2.04459e-06	0.0539853	-0.181318	0.19	0.312
	ATP9A	7.3966e-61	1.953e-56	0.137296	0.103	0.014		CHPT1	1.12426e-07	0.00296849	-0.144531	0.117	0.212		DCLK2	1.36558e-41	3.60568e-37	-0.168972	0.07	0.171		RNF24	0.000425595	1	-0.112241	0.295	0.349		AC069277.1	2.03924e-14	5.38442e-10	0.272783	0.097	0.011		KL	4.54075e-06	0.119894	0.237546	0.161	0.05		SLC6A6	2.12339e-06	0.056066	-0.162781	0.069	0.151
	FAAH2	8.62478e-61	2.27729e-56	0.302536	0.285	0.126		FAM171A1	1.14093e-07	0.00301251	0.134154	0.305	0.202		EPM2A	1.40641e-41	3.71349e-37	-0.190996	0.124	0.242		ETNK1	0.000448708	1	-0.1022	0.364	0.424		KLF6	2.09036e-14	5.51938e-10	-0.171469	0.058	0.145		FCHSD2	4.5851e-06	0.121065	-0.156095	0.227	0.375		RASAL2	2.22744e-06	0.0588134	-0.243002	0.297	0.43
	PDZK1	1.21027e-60	3.1956e-56	-0.30143	0.543	0.714		AC005208.1	1.15959e-07	0.00306177	-0.19578	0.147	0.244		RALGAPA2	2.15624e-41	5.69335e-37	0.23922	0.518	0.396		GALNT18	0.000466335	1	-0.128816	0.391	0.445		ITGA3	2.19054e-14	5.78391e-10	-0.178687	0.111	0.221		PRKAB1	4.67312e-06	0.123389	-0.11207	0.055	0.133		OPHN1	2.29132e-06	0.0605	0.266837	0.479	0.35
	UNC79	1.29765e-60	3.4263e-56	-0.262511	0.087	0.244		TFDP2	1.16821e-07	0.00308455	-0.208473	0.321	0.429		OSBPL1A	2.62309e-41	6.92601e-37	-0.174809	0.109	0.222		KIAA1109	0.000471091	1	-0.115612	0.465	0.515		TGIF1	2.3041e-14	6.08375e-10	-0.102009	0.026	0.091		BHLHE40	4.73127e-06	0.124924	0.4308	0.409	0.279		THEM4	2.31045e-06	0.0610052	-0.140605	0.112	0.211
	PTER	1.38088e-60	3.64606e-56	-0.408648	0.187	0.361		OXR1	1.22722e-07	0.00324035	0.309465	0.876	0.849		PPM1H	4.28333e-41	1.13097e-36	0.260398	0.399	0.28		BACH2	0.000471204	1	0.122636	0.28	0.225		CASP4	2.39853e-14	6.33309e-10	-0.107484	0.036	0.109		DCAF7	4.83575e-06	0.127683	-0.154928	0.1	0.2		SLC30A7	2.41171e-06	0.0636787	-0.145289	0.112	0.211
	GPAT3	1.756e-60	4.63654e-56	-0.470827	0.124	0.291		FUT6	1.24314e-07	0.0032824	-0.135019	0.085	0.171		AC079142.1	4.73434e-41	1.25006e-36	-0.254561	0.282	0.416		KITLG	0.000482415	1	0.147791	0.252	0.203		OSBPL10	2.77393e-14	7.32428e-10	-0.196897	0.157	0.283		JAZF1	4.91912e-06	0.129885	-0.124163	0.063	0.146		HIST1H2BC	2.4148e-06	0.0637604	0.225655	0.12	0.033
	AC017101.1	1.88256e-60	4.97071e-56	0.153021	0.118	0.021		ZEB2	1.3093e-07	0.00345706	0.24438	0.434	0.329		COX10	4.86352e-41	1.28416e-36	-0.165518	0.12	0.236		NEK7	0.000489803	1	0.10726	0.431	0.377		AP000462.1	2.97138e-14	7.84563e-10	0.146377	0.133	0.032		RFX7	5.01324e-06	0.13237	-0.15973	0.244	0.388		SNTG1	2.53799e-06	0.067013	0.390251	0.091	0.015
	SAMD12	2.12784e-60	5.61835e-56	0.351341	0.539	0.359		ATP8B4	1.31607e-07	0.00347496	-0.143633	0.07	0.152		STRBP	4.94884e-41	1.30669e-36	-0.206911	0.261	0.398		SAMD12	0.000497855	1	0.109398	0.755	0.709		LGR4	3.81183e-14	1.00648e-09	0.260436	0.775	0.655		LYN	5.22832e-06	0.138049	-0.133003	0.097	0.196		FAM182B	2.53933e-06	0.0670486	-0.121079	0.079	0.166
	AC239809.3	2.3364e-60	6.16902e-56	0.135511	0.111	0.017		ACSS2	1.34311e-07	0.00354636	-0.163541	0.15	0.248		AC007319.1	6.45137e-41	1.70342e-36	0.218399	0.222	0.12		PLCB4	0.000543777	1	0.100952	0.131	0.091		NOS1AP	3.83544e-14	1.01271e-09	0.354682	0.652	0.526		SPIRE1	5.36391e-06	0.141629	0.288105	0.652	0.542		ZBTB38	2.5726e-06	0.067927	-0.147087	0.118	0.22
	AC099792.1	2.49981e-60	6.6005e-56	0.151006	0.084	0.006		MAOA	1.38324e-07	0.00365232	-0.128192	0.055	0.132		SIRLNT	7.06408e-41	1.8652e-36	-0.119821	0.003	0.062		SIPA1L1	0.000610238	1	0.104324	0.494	0.43		LIMCH1	4.45821e-14	1.17715e-09	-0.316082	0.774	0.825		PDGFC	5.39126e-06	0.142351	-0.156006	0.143	0.258		TAPBP	2.73138e-06	0.0721194	-0.104858	0.059	0.136
	GALM	7.65317e-60	2.02074e-55	-0.281108	0.235	0.425		TPCN1	1.40899e-07	0.00372029	-0.161484	0.194	0.301		PTPRM	1.18148e-40	3.11959e-36	0.282754	0.681	0.575		NTRK2	0.000650591	1	0.107503	0.243	0.192		LEPR	4.63901e-14	1.22488e-09	-0.145214	0.08	0.178		LINC02778	5.43926e-06	0.143618	-0.10398	0.038	0.104		PDZRN3	2.80327e-06	0.0740175	0.211373	0.213	0.101
	CDK14	9.86669e-60	2.6052e-55	-0.370554	0.56	0.713		NRP1	1.43748e-07	0.00379553	-0.334029	0.63	0.703		FA2H	1.45957e-40	3.85384e-36	-0.143121	0.052	0.145		DAPK1	0.000666152	1	-0.117998	0.596	0.639		AC040174.1	4.74555e-14	1.25301e-09	0.252456	0.456	0.304		PPHLN1	5.50582e-06	0.145376	-0.155222	0.155	0.275		TUSC3	2.86623e-06	0.07568	-0.153469	0.201	0.323
	DAB2	1.15506e-59	3.04982e-55	-0.290768	0.556	0.748		CLDN4	1.43818e-07	0.00379738	0.105982	0.166	0.091		MPDZ	2.29348e-40	6.05571e-36	-0.199874	0.203	0.332		LINC01473	0.000678286	1	-0.135988	0.556	0.59		KIAA1217	4.79233e-14	1.26537e-09	0.276694	0.677	0.546		GNAL	5.66372e-06	0.149545	-0.110139	0.029	0.088		SLC12A8	2.89164e-06	0.0763508	-0.10336	0.044	0.113
	FAM20C	1.59397e-59	4.20873e-55	-0.274621	0.148	0.323		MCF2L	1.45977e-07	0.00385438	-0.200647	0.246	0.352		ACTN4	2.63256e-40	6.95102e-36	0.21589	0.282	0.171		NEDD4L	0.000701952	1	0.151936	0.636	0.604		GABRA2	4.95247e-14	1.30765e-09	0.187957	0.154	0.047		GOLGA8A	5.86949e-06	0.154978	-0.160772	0.129	0.238		AL033504.1	3.00672e-06	0.0793894	-0.212973	0.234	0.356
	LRRIQ1	1.74588e-59	4.60981e-55	0.247538	0.232	0.09		PDE7A	1.46902e-07	0.0038788	-0.246666	0.341	0.447		AC124947.1	3.48324e-40	9.19715e-36	-0.159421	0.06	0.155		TRHDE	0.000707813	1	-0.11188	0.344	0.399		SH2D4A	5.00973e-14	1.32277e-09	-0.110559	0.035	0.106		TRIM38	5.90951e-06	0.156035	-0.117326	0.063	0.146		STOX2	3.01726e-06	0.0796677	-0.186815	0.387	0.534
	TRABD2B	2.01547e-59	5.32164e-55	-0.405179	0.593	0.755		LIN52	1.47284e-07	0.00388888	-0.143948	0.086	0.172		HYDIN	3.58804e-40	9.47387e-36	0.15772	0.236	0.131		TNFAIP8	0.000743017	1	0.100132	0.207	0.162		GLCE	5.44364e-14	1.43734e-09	0.196101	0.265	0.131		MAP3K9	6.1128e-06	0.161402	-0.121641	0.061	0.142		TEX41	3.07201e-06	0.0811133	0.338169	0.529	0.404
	ABCC1	2.36321e-59	6.23982e-55	0.172373	0.154	0.04		EIF5B	1.515e-07	0.00400022	0.11648	0.248	0.154		PPM1K	3.70046e-40	9.77069e-36	-0.161747	0.081	0.184		CDC42BPA	0.000747521	1	-0.101938	0.578	0.632		COL4A1	5.88004e-14	1.55257e-09	-0.163968	0.095	0.199		DLEU2	6.1433e-06	0.162208	-0.150823	0.118	0.225		CCDC14	3.10665e-06	0.082028	-0.166089	0.166	0.276
	NRCAM	2.81468e-59	7.43189e-55	0.313945	0.204	0.071		BNIP3L	1.59376e-07	0.00420815	-0.16598	0.144	0.24		ASTN2	5.02734e-40	1.32742e-35	0.292996	0.503	0.383		PPP1CB	0.000813217	1	0.154159	0.391	0.344		ARHGAP6	5.96173e-14	1.57414e-09	0.226407	0.885	0.771		KCNIP1	6.21252e-06	0.164035	0.381613	0.386	0.254		SNHG14	3.14467e-06	0.0830318	-0.225176	0.759	0.852
	KYNU	3.14532e-59	8.3049e-55	-0.258414	0.128	0.299		WWC1	1.64565e-07	0.00434518	0.249141	0.675	0.567		OGDH	5.59565e-40	1.47748e-35	-0.185727	0.22	0.352		BTBD7	0.000877183	1	0.112809	0.441	0.387		PRDM16-DT	6.10215e-14	1.61121e-09	0.192822	0.237	0.108		COL4A2	6.3118e-06	0.166657	-0.172485	0.204	0.333		PTER	3.27425e-06	0.0864533	-0.121244	0.08	0.166
	RDX	3.36236e-59	8.87796e-55	-0.808878	0.321	0.473		ST6GAL1	1.65994e-07	0.00438291	0.121173	0.157	0.084		CKMT2	6.57752e-40	1.73673e-35	-0.122575	0.033	0.116		ARHGAP18	0.000885446	1	-0.101487	0.255	0.306		HSD11B2	6.19136e-14	1.63477e-09	0.230825	0.571	0.403		PNP	6.49045e-06	0.171374	0.195975	0.116	0.021		TBC1D16	3.40624e-06	0.0899383	-0.194234	0.229	0.347
	AL845331.2	3.69363e-59	9.75267e-55	-0.18476	0.006	0.108		GOLGA4	1.75831e-07	0.00464265	-0.194205	0.556	0.647		FMNL2	7.83736e-40	2.06938e-35	0.235741	0.378	0.255		PTPRM	0.000910066	1	0.118065	0.709	0.664		ADAM10	6.49811e-14	1.71576e-09	-0.255572	0.29	0.427		LINC01572	6.55587e-06	0.173101	-0.137571	0.1	0.2		BACH1	3.54807e-06	0.0936832	-0.153995	0.224	0.353
	ADAM10	3.80622e-59	1.00499e-54	0.334668	0.329	0.167		TTC38	1.76462e-07	0.00465931	-0.153661	0.127	0.221		RNF213-AS1	8.62555e-40	2.27749e-35	-0.193854	0.224	0.354		RAP1GAP2	0.000912256	1	0.108378	0.316	0.264		CCDC14	6.52077e-14	1.72174e-09	-0.168118	0.133	0.249		EFHD1	6.6608e-06	0.175872	0.182114	0.147	0.042		ZNF195	3.61519e-06	0.0954554	-0.108766	0.049	0.119
	PDE7A	4.54263e-59	1.19944e-54	-0.369267	0.422	0.598		GNB1	1.79044e-07	0.00472748	0.164456	0.426	0.316		SGMS1	8.70559e-40	2.29862e-35	0.262853	0.538	0.42		WWOX	0.000985034	1	0.130319	0.807	0.783		NT5DC1	7.34246e-14	1.9387e-09	0.231546	0.508	0.354		FSD1L	6.72884e-06	0.177668	-0.141655	0.113	0.217		CLN5	3.63968e-06	0.0961022	-0.104647	0.06	0.136
	RAD51B	5.14204e-59	1.35771e-54	0.354661	0.419	0.243		MTSS1	1.82267e-07	0.00481257	-0.150715	0.186	0.295		WWOX	1.11506e-39	2.94421e-35	-0.260569	0.792	0.868		LINC00621	0.00105294	1	0.186925	0.247	0.201		ACAT1	8.17429e-14	2.15834e-09	0.14617	0.137	0.036		USP25	6.93368e-06	0.183077	0.256845	0.526	0.379		INPP5J	3.67584e-06	0.0970568	0.150318	0.14	0.047
	AC034195.1	5.43409e-59	1.43482e-54	-0.400966	0.263	0.446		VAV3	1.91294e-07	0.00505092	-0.176624	0.17	0.271		CHPT1	1.2504e-39	3.30155e-35	-0.144914	0.055	0.147		ZNF518A	0.00108072	1	-0.101484	0.347	0.398		FNDC3A	8.30755e-14	2.19352e-09	-0.231161	0.338	0.478		SLC20A1	7.02106e-06	0.185384	0.446469	0.21	0.092		DOCK10	3.86629e-06	0.102085	0.175983	0.164	0.065
	RAPGEF2	5.6399e-59	1.48916e-54	0.36467	0.608	0.444		MRTFA	2.00237e-07	0.00528705	0.145934	0.328	0.225		FGFR3	1.72484e-39	4.55428e-35	-0.132411	0.045	0.133		ARL15	0.001211	1	-0.111338	0.439	0.484		PALM2-AKAP2	8.95518e-14	2.36453e-09	-0.227158	0.087	0.184		SLC41A2	7.03976e-06	0.185878	-0.105534	0.02	0.071		GRIP1	4.20999e-06	0.111161	0.314301	0.802	0.766
	CLSTN2	6.32322e-59	1.66958e-54	1.03387	0.334	0.181		TMEM163	2.05362e-07	0.00542238	0.116904	0.219	0.131		IL1RL2	2.04657e-39	5.40376e-35	-0.126385	0.034	0.116		PAWR	0.00124659	1	0.110523	0.377	0.328		DIO2	9.67622e-14	2.55491e-09	0.166325	0.111	0.021		TCAF2	7.14022e-06	0.18853	0.151237	0.122	0.025		TSC22D2	4.52314e-06	0.119429	0.231936	0.304	0.184
	SHPK	7.6341e-59	2.01571e-54	-0.238278	0.111	0.275		PDGFC	2.08076e-07	0.00549404	0.310465	0.581	0.499		USP24	2.38301e-39	6.29209e-35	-0.243494	0.384	0.506		CLASP1	0.00137897	1	0.103481	0.584	0.525		MSN	9.78349e-14	2.58323e-09	-0.138378	0.076	0.171		MIR3681HG	7.33991e-06	0.193803	-0.107599	0.036	0.1		CCDC200	4.68991e-06	0.123832	-0.103574	0.06	0.136
	PPP1CB	8.2262e-59	2.17205e-54	0.258434	0.235	0.094		ARNT2	2.12878e-07	0.00562083	0.136495	0.261	0.166		VEGFA	2.62196e-39	6.92301e-35	-0.131545	0.058	0.152		B4GALT5	0.00141017	1	0.105179	0.267	0.221		MECOM	9.80288e-14	2.58835e-09	-0.243451	0.993	0.993		CEP112	7.42335e-06	0.196006	-0.206478	0.216	0.346		CASC15	4.79264e-06	0.126545	-0.12176	0.033	0.092
	TBL1X	9.52719e-59	2.51556e-54	0.360319	0.429	0.254		YWHAQ	2.13744e-07	0.00564369	0.114612	0.21	0.125		PCDH9	3.12656e-39	8.25537e-35	-0.36554	0.634	0.725		MAP4K3	0.00147137	1	0.100169	0.452	0.405		RNF217	1.01592e-13	2.68243e-09	-0.130147	0.072	0.164		GNAI1	7.85985e-06	0.207532	-0.111284	0.056	0.133		TSPAN5	4.85741e-06	0.128255	0.276695	0.434	0.306
	AFAP1	1.06118e-58	2.80195e-54	0.180484	0.17	0.05		MIOX	2.14045e-07	0.00565165	-0.120252	0.038	0.105		SYT10	3.73443e-39	9.8604e-35	-0.114156	0.017	0.087		RASSF8	0.0015242	1	-0.105783	0.243	0.292		SGMS1	1.01744e-13	2.68645e-09	-0.250079	0.317	0.449		ARHGEF5	8.04665e-06	0.212464	-0.104029	0.046	0.117		SLC35F5	4.91381e-06	0.129744	-0.201608	0.198	0.309
	HYDIN	1.27631e-58	3.36996e-54	0.248288	0.288	0.131		TSC22D2	2.21188e-07	0.00584026	0.159431	0.281	0.184		CMYA5	4.03957e-39	1.06661e-34	-0.19415	0.117	0.228		ANXA4	0.00154438	1	0.133642	0.372	0.329		SLC9C1	1.06943e-13	2.82372e-09	0.200343	0.237	0.109		CTTN	8.65405e-06	0.228502	-0.139352	0.141	0.254		MAST4	5.02231e-06	0.132609	-0.139448	0.075	0.157
	GPT2	1.42446e-58	3.76113e-54	-0.218066	0.083	0.237		GATM	2.26353e-07	0.00597661	-0.156039	0.173	0.273		NAIP	4.70546e-39	1.24243e-34	-0.191343	0.255	0.386		TRPS1	0.00162275	1	-0.110031	0.568	0.61		USP31	1.10321e-13	2.91292e-09	-0.107175	0.032	0.099		NEK11	9.17182e-06	0.242173	-0.125589	0.179	0.308		AC073172.1	5.02511e-06	0.132683	-0.185278	0.158	0.267
	IGF1R	1.56421e-58	4.13014e-54	-0.332371	0.737	0.844		WDR43	2.32649e-07	0.00614285	0.108529	0.192	0.111		RNF212	5.08381e-39	1.34233e-34	-0.129263	0.046	0.133		OSBPL10	0.00173096	1	0.104426	0.484	0.43		YBX3	1.21511e-13	3.20838e-09	-0.151865	0.097	0.2		RPL13A	9.37173e-06	0.247451	-0.137646	0.074	0.158		PAX8	5.0387e-06	0.133042	-0.211538	0.872	0.926
	LINC01517	1.89117e-58	4.99345e-54	-0.224634	0.027	0.147		TP53BP2	2.34972e-07	0.0062042	0.125723	0.181	0.104		SVIL	5.75401e-39	1.51929e-34	0.185414	0.581	0.436		SYTL2	0.0018754	1	0.120829	0.479	0.437		LIMA1	1.3401e-13	3.53841e-09	-0.161127	0.093	0.193		GCC2	9.37899e-06	0.247643	-0.182868	0.266	0.404		ITGB3BP	5.04825e-06	0.133294	-0.140941	0.115	0.211
	PRKCZ	1.97776e-58	5.22207e-54	-0.2359	0.109	0.272		NFE2L2	2.47521e-07	0.00653554	0.161533	0.341	0.239		USP53	7.06046e-39	1.86424e-34	-0.28809	0.533	0.635		SSBP2	0.0019691	1	-0.11845	0.522	0.559		ADAMTS16	1.43538e-13	3.78999e-09	-0.384499	0.459	0.562		PDGFD	9.6286e-06	0.254234	-0.112012	0.034	0.096		AC002460.2	5.14606e-06	0.135877	-0.28653	0.448	0.567
	SAMD5	2.05219e-58	5.41859e-54	-0.266505	0.229	0.421		KLF9	2.54755e-07	0.00672656	-0.105415	0.036	0.103		AC093523.1	8.21936e-39	2.17024e-34	-0.146599	0.026	0.102		ST6GAL1	0.00210963	1	0.104651	0.314	0.268		PUM3	1.44861e-13	3.82492e-09	-0.202283	0.18	0.305		JADE1	9.7774e-06	0.258163	-0.123043	0.109	0.212		NUAK2	5.17736e-06	0.136703	0.375098	0.26	0.151
	CAP2	2.84149e-58	7.50266e-54	0.228092	0.261	0.111		UGT3A1	2.61271e-07	0.0068986	-0.116286	0.055	0.13		AC009053.3	8.89403e-39	2.34838e-34	-0.127135	0.046	0.134		ITGB1	0.00218043	1	0.103814	0.237	0.192		AC096531.2	1.51221e-13	3.99283e-09	-0.155083	0.049	0.127		TMEM116	9.7978e-06	0.258701	0.217899	0.322	0.188		CHN2	5.19409e-06	0.137145	-0.238083	0.355	0.484
	OSMR	2.88967e-58	7.62987e-54	0.185131	0.146	0.036		SH3GL2	2.76887e-07	0.00731092	-0.178879	0.137	0.231		ZMAT4	1.21967e-38	3.2204e-34	-0.116226	0.007	0.068		MRPS6	0.00222002	1	-0.10865	0.302	0.344		AC004540.1	1.54809e-13	4.08757e-09	-0.170669	0.115	0.224		CLIP2	9.81861e-06	0.25925	-0.130358	0.054	0.129		MAP3K1	5.42234e-06	0.143172	-0.208415	0.231	0.35
	PLCB1	3.65291e-58	9.64515e-54	0.372436	0.241	0.098		AF117829.1	2.95531e-07	0.00780321	0.200575	0.515	0.412		FBXL4	1.29523e-38	3.41991e-34	-0.211441	0.317	0.448		LINC02341	0.0039253	1	0.111969	0.067	0.043		BBOX1-AS1	1.77192e-13	4.67857e-09	-0.140833	0.032	0.099		ACTR3C	9.99792e-06	0.263985	-0.183386	0.339	0.483		CLDN4	5.4973e-06	0.145151	-0.100603	0.069	0.148
	SORL1	4.26323e-58	1.12566e-53	0.110599	0.077	0.005		AC092153.1	3.13007e-07	0.00826463	0.113346	0.166	0.093		HOGA1	1.33437e-38	3.52328e-34	-0.156547	0.085	0.187		PCCA	0.00417247	1	-0.106989	0.685	0.7		CDC42SE2	1.82462e-13	4.81773e-09	-0.181748	0.126	0.238		KCNJ15	1.07328e-05	0.283388	0.439975	0.483	0.358		ST6GAL1	5.67621e-06	0.149875	-0.276501	0.496	0.629
	TRPC1	4.28193e-58	1.1306e-53	0.183367	0.159	0.044		SGK3	3.16451e-07	0.00835557	-0.184802	0.263	0.364		RASSF8-AS1	1.84238e-38	4.86461e-34	-0.163357	0.103	0.21		SVIL	0.00435156	1	0.114016	0.601	0.568		SEMA4B	1.84427e-13	4.8696e-09	-0.154509	0.094	0.195		TBC1D16	1.08698e-05	0.287006	-0.16172	0.185	0.308		AL592183.1	5.69487e-06	0.150367	-0.148829	0.106	0.199
	CFAP221	5.01638e-58	1.32453e-53	0.17212	0.152	0.04		GTDC1	3.23616e-07	0.00854475	0.180775	0.352	0.254		MYO3B	2.36261e-38	6.23824e-34	-0.262498	0.462	0.586		CNKSR3	0.00660839	1	0.146456	0.52	0.483		EYA2	1.95599e-13	5.1646e-09	0.195526	0.273	0.138		MAPK14	1.10464e-05	0.291669	-0.229943	0.246	0.371		HIST2H2BE	5.74025e-06	0.151566	0.132452	0.096	0.021
	FGD4	5.92943e-58	1.56561e-53	-0.371667	0.554	0.704		GLG1	3.24521e-07	0.00856865	-0.188989	0.328	0.436		PHACTR2	2.59898e-38	6.86234e-34	0.173733	0.229	0.128		XIST	0.00723619	1	-0.154395	0.198	0.235		LPCAT2	2.16046e-13	5.70449e-09	0.22345	0.25	0.123		H3F3A	1.135e-05	0.299686	-0.107809	0.068	0.15		KLF11	5.79494e-06	0.15301	0.182864	0.128	0.042
	NEGR1	6.45165e-58	1.70349e-53	-0.311401	0.102	0.263		HGD	3.34973e-07	0.00884463	-0.130344	0.093	0.177		COL14A1	5.1792e-38	1.36752e-33	0.151017	0.148	0.068		WFDC2	0.0081902	1	-0.118443	0.368	0.41		IQCK	2.18325e-13	5.76464e-09	-0.195811	0.251	0.39		B4GALT1	1.16445e-05	0.30746	-0.177749	0.152	0.262		PTCHD1-AS	6.06262e-06	0.160078	-0.160343	0.056	0.128
	CLDN4	7.13141e-58	1.88298e-53	0.143196	0.108	0.018		ATXN1	3.37176e-07	0.0089028	0.203315	0.556	0.456		PANTR1	5.22804e-38	1.38041e-33	-0.219574	0.356	0.49		RCAN1	0.0108767	1	0.113163	0.12	0.093		USP2	2.45852e-13	6.49148e-09	0.123839	0.104	0.018		PLCXD2	1.16657e-05	0.308021	0.284643	0.564	0.417		RBKS	6.09924e-06	0.161044	-0.135024	0.106	0.199
	PTPRK	9.84556e-58	2.59962e-53	0.384891	0.756	0.651		IRAK2	3.37896e-07	0.00892181	0.115127	0.119	0.059		MCU	9.40138e-38	2.48234e-33	0.189042	0.309	0.194		GAREM1	0.0128846	1	0.124216	0.458	0.427		SLC25A27	2.66809e-13	7.04483e-09	0.178585	0.291	0.155		ZMIZ2	1.17728e-05	0.310848	-0.122397	0.085	0.175		RASEF	6.16179e-06	0.162696	-0.124278	0.108	0.202
	HLA-A	1.25367e-57	3.3102e-53	0.148673	0.119	0.023		PEPD	3.49242e-07	0.00922137	-0.131536	0.09	0.173		SORCS3	9.44867e-38	2.49483e-33	0.146116	0.151	0.069		DEPTOR	0.01414	1	-0.129932	0.658	0.692		ADAMTS9-AS2	2.9564e-13	7.80608e-09	-0.363984	0.813	0.851		YAP1	1.18071e-05	0.311754	-0.163233	0.455	0.613		ARHGAP26	6.23258e-06	0.164565	-0.1407	0.056	0.128
	MPP6	1.43517e-57	3.78943e-53	0.323942	0.416	0.24		PLEKHA6	3.51339e-07	0.00927677	-0.186227	0.232	0.334		VLDLR-AS1	1.01358e-37	2.67626e-33	-0.161507	0.092	0.195		SGO1-AS1	0.0243219	1	-0.110866	0.267	0.302		PAM	3.84851e-13	1.01616e-08	-0.225241	0.333	0.475		NR0B2	1.19505e-05	0.31554	0.158568	0.09	0.008		STAT3	6.39544e-06	0.168865	-0.132429	0.348	0.499
	PHLDB1	1.49612e-57	3.95035e-53	0.18914	0.199	0.069		C4orf19	3.74214e-07	0.00988075	0.197862	0.39	0.289		SLC25A33	1.15725e-37	3.05561e-33	-0.205053	0.152	0.267		CASC15	0.0345237	1	0.13189	0.271	0.245		MAP3K1	3.93192e-13	1.03818e-08	-0.235064	0.271	0.403		PAM	1.24254e-05	0.328081	-0.210759	0.302	0.442		TACR1	6.45174e-06	0.170352	-0.106176	0.046	0.113
	OPCML	2.42391e-57	6.40008e-53	-0.238416	0.016	0.126		PPP1R9A	3.76719e-07	0.00994688	0.197869	0.69	0.586		GABRB1	1.46877e-37	3.87813e-33	-0.161787	0.067	0.161		LRMDA	0.135911	1	0.123951	0.243	0.224		TMCO4	4.03369e-13	1.06506e-08	-0.181644	0.154	0.269		MYO5B	1.25371e-05	0.331029	-0.180705	0.232	0.362		USP9X	6.68967e-06	0.176634	0.340048	0.438	0.326
	LRRK1	3.08191e-57	8.13748e-53	0.108577	0.078	0.005		KHDRBS3	3.98723e-07	0.0105279	0.185151	0.3	0.205		AP1S3	1.57751e-37	4.16525e-33	0.232083	0.325	0.215		WNK1	0.225857	1	-0.149679	0.321	0.326		POGLUT3	4.08542e-13	1.07871e-08	0.150379	0.142	0.043		ERI1	1.2728e-05	0.336069	-0.107563	0.042	0.108		MAFF	6.75365e-06	0.178323	0.133287	0.069	0.006
	AC021594.2	3.30509e-57	8.72675e-53	-0.173225	0.002	0.097		TIMD4	3.99145e-07	0.010539	0.104104	0.199	0.118		KCNMA1	1.84253e-37	4.86501e-33	-0.162825	0.039	0.121									TCF7L2	4.09331e-13	1.0808e-08	-0.2285	0.241	0.37		TRAPPC9	1.275e-05	0.336652	0.248541	0.62	0.483		TRAPPC9	6.84438e-06	0.180719	0.222065	0.545	0.418
	SAMD4A	3.77284e-57	9.96181e-53	0.543702	0.486	0.325		KLHL14	4.04368e-07	0.0106769	0.134047	0.108	0.051		AP000282.1	2.11602e-37	5.58715e-33	-0.16196	0.051	0.138									AC008554.1	4.13006e-13	1.0905e-08	-0.114732	0.034	0.101		RGS3	1.28758e-05	0.339973	-0.14699	0.118	0.221		LINC02615	6.99315e-06	0.184647	-0.127307	0.078	0.16
	HSPA1A	6.15783e-57	1.62591e-52	0.208606	0.122	0.025		AC111000.4	4.0717e-07	0.0107509	-0.194089	0.189	0.289		NT5DC1	2.17092e-37	5.7321e-33	-0.209604	0.259	0.387									SCN3A	4.47701e-13	1.18211e-08	-0.297492	0.38	0.507		IQCA1	1.29398e-05	0.341662	-0.113919	0.069	0.15		SPINT2	7.42348e-06	0.19601	-0.113994	0.078	0.16
	ACTR3	6.8709e-57	1.81419e-52	0.204275	0.205	0.074		DAAM1	4.1027e-07	0.0108328	0.137076	0.276	0.182		CHCHD10	3.336e-37	8.80837e-33	-0.132118	0.066	0.159									TSPAN12	5.01899e-13	1.32521e-08	-0.172666	0.122	0.229		PFKFB1	1.29801e-05	0.342726	0.16529	0.124	0.029		PARP14	7.68477e-06	0.202909	-0.159962	0.141	0.24
	TGFB2	7.33276e-57	1.93614e-52	0.149211	0.076	0.005		ACOT11	4.13784e-07	0.0109255	-0.130095	0.098	0.183		MTCL1	3.40031e-37	8.97819e-33	-0.148111	0.075	0.171									DIAPH2	5.16636e-13	1.36413e-08	-0.157302	0.09	0.188		HMGCR	1.30377e-05	0.344248	0.198226	0.172	0.062		TTTY10	7.74917e-06	0.204609	0.157549	0.144	0.053
	PIPOX	8.10661e-57	2.14047e-52	-0.173257	0.032	0.154		COL19A1	4.25782e-07	0.0112424	-0.136604	0.049	0.119		CASTOR3	3.75437e-37	9.91303e-33	0.123676	0.172	0.084									RASSF8	5.37052e-13	1.41803e-08	0.287778	0.378	0.247		PTBP3	1.31716e-05	0.347784	-0.333778	0.507	0.625		ARID3A	8.08865e-06	0.213573	0.215061	0.21	0.107
	PTPRO	1.04112e-56	2.74898e-52	0.201049	0.092	0.011		AC019117.1	4.33838e-07	0.0114551	0.111239	0.119	0.059		ZMYND8	3.96104e-37	1.04587e-32	-0.212735	0.306	0.433									MVP	5.80816e-13	1.53359e-08	-0.124957	0.065	0.151		ARID5B	1.38824e-05	0.366551	-0.248923	0.249	0.375		PDGFC	8.30935e-06	0.2194	-0.15861	0.123	0.22
	CADM1	1.07854e-56	2.84778e-52	0.230432	0.185	0.061		FSD1L	4.49677e-07	0.0118733	0.146468	0.272	0.183		MTX2	4.07697e-37	1.07648e-32	-0.206806	0.325	0.455									TACC2	5.90935e-13	1.56031e-08	0.220164	0.313	0.181		SERGEF	1.44369e-05	0.381193	-0.126444	0.097	0.192		AC023282.1	8.66082e-06	0.22868	-0.140057	0.095	0.184
	SAT2	1.25596e-56	3.31625e-52	-0.208724	0.078	0.227		KCNMB2	4.6951e-07	0.0123969	-0.131796	0.042	0.11		MAN1A1	4.28886e-37	1.13243e-32	-0.250869	0.279	0.403									SLC22A3	5.95437e-13	1.57219e-08	0.146563	0.132	0.036		CADM1	1.55458e-05	0.410472	-0.198437	0.109	0.204		PDE8B	8.68798e-06	0.229397	0.18422	0.336	0.211
	ARMC3	1.44595e-56	3.81788e-52	0.134661	0.1	0.015		MAOB	4.70393e-07	0.0124203	-0.121952	0.126	0.218		ARMH4	4.31491e-37	1.13931e-32	-0.134302	0.058	0.148									SMARCC1	6.00397e-13	1.58529e-08	-0.201912	0.256	0.388		AL365295.1	1.62677e-05	0.429532	0.23559	0.19	0.079		LINC01376	8.75254e-06	0.231102	-0.149944	0.101	0.19
	LPIN2	1.72739e-56	4.56099e-52	0.346742	0.35	0.188		TCEA3	4.70702e-07	0.0124284	-0.116906	0.075	0.154		AL031073.2	5.56626e-37	1.46971e-32	-0.2896	0.082	0.179									CFAP43	6.9989e-13	1.84799e-08	-0.121259	0.053	0.133		MTRNR2L12	1.6913e-05	0.446571	-0.177218	0.054	0.125		GPRC5C	9.06544e-06	0.239364	0.25656	0.384	0.273
	NAV2	2.12657e-56	5.61501e-52	0.156151	0.091	0.011		FAT1	4.72304e-07	0.0124707	0.193058	0.599	0.501		AL355499.1	5.6166e-37	1.48301e-32	-0.138899	0.047	0.132									PKM	7.04325e-13	1.8597e-08	-0.17635	0.193	0.319		APCDD1L	1.72814e-05	0.456298	0.172699	0.152	0.05		STAG1	9.07549e-06	0.239629	0.244602	0.576	0.454
	NCEH1	2.78882e-56	7.36361e-52	0.461496	0.335	0.176		CAT	4.76814e-07	0.0125898	-0.111296	0.055	0.128		ZNF493	5.68266e-37	1.50045e-32	-0.166861	0.176	0.295									WDR72	7.52129e-13	1.98592e-08	0.237048	0.727	0.606		PTK2B	1.83297e-05	0.483977	-0.105921	0.053	0.125		TCF7L2	9.20183e-06	0.242965	0.236414	0.503	0.392
	CCDC198	2.84977e-56	7.52454e-52	0.333249	0.665	0.513		NLN	4.81808e-07	0.0127217	0.115995	0.175	0.101		AHR	6.51208e-37	1.71945e-32	0.120759	0.127	0.054									IDH2	7.7397e-13	2.04359e-08	0.212288	0.429	0.283		ADM	2.00442e-05	0.529246	0.168979	0.114	0.025		KIF12	9.23556e-06	0.243856	-0.142801	0.131	0.228
	BAZ2B	3.06656e-56	8.09695e-52	0.321069	0.628	0.464		FTL	4.82984e-07	0.0127527	-0.256845	0.233	0.329		CDC42BPA	7.13849e-37	1.88485e-32	0.216953	0.611	0.504									ANKRD10	7.95292e-13	2.09989e-08	-0.17785	0.273	0.41		CU633967.1	2.02821e-05	0.535528	-0.130888	0.079	0.162		JAG1	9.353e-06	0.246957	-0.129464	0.076	0.154
	TYMP	3.22147e-56	8.50596e-52	0.125732	0.09	0.011		SLC4A7	4.92055e-07	0.0129922	0.124124	0.259	0.167		NPNT	7.30522e-37	1.92887e-32	0.179547	0.239	0.137									GAREM1	8.47775e-13	2.23846e-08	-0.267407	0.366	0.497		ALCAM	2.07918e-05	0.548987	-0.13149	0.077	0.162		MARK3	9.41291e-06	0.248539	0.234702	0.557	0.442
	DHRS3	4.67513e-56	1.23442e-51	-0.23691	0.076	0.222		DOCK7	5.08722e-07	0.0134323	0.144953	0.356	0.256		KIF26B	8.0875e-37	2.13542e-32	0.191013	0.154	0.073									CD47	9.10025e-13	2.40283e-08	-0.14318	0.084	0.178		SLC38A4	2.09733e-05	0.553778	0.133388	0.108	0.021		ZFAND3	9.66123e-06	0.255095	0.230156	0.793	0.721
	AC087477.2	6.38836e-56	1.68678e-51	0.143139	0.122	0.025		UACA	5.16833e-07	0.0136465	0.159329	0.401	0.294		TBC1D4	1.00708e-36	2.65909e-32	-0.180622	0.611	0.752									NPR3	9.22781e-13	2.43651e-08	0.135116	0.122	0.03		FANK1	2.19184e-05	0.578734	-0.107021	0.072	0.154		DOK5	9.78009e-06	0.258233	-0.115662	0.053	0.122
	ATRNL1	6.43268e-56	1.69849e-51	0.156779	0.102	0.016		LNPEP	5.29727e-07	0.0139869	0.12429	0.237	0.15		P2RY6	1.15848e-36	3.05886e-32	0.101263	0.098	0.036									STAC	9.68031e-13	2.55599e-08	0.187575	0.286	0.152		LINC00276	2.19734e-05	0.580186	-0.120815	0.036	0.096		SYNE1	9.8561e-06	0.26024	-0.23674	0.565	0.677
	AC114291.1	6.82829e-56	1.80294e-51	-0.150001	0.009	0.11		PSME4	5.41927e-07	0.014309	0.122791	0.264	0.172		NR2F1-AS1	1.50741e-36	3.98017e-32	-0.192098	0.144	0.256									LINC02341	1.08102e-12	2.85432e-08	-0.104908	0.015	0.065		SLC6A6	2.25945e-05	0.596586	-0.129144	0.082	0.167		PKD2	9.96808e-06	0.263197	-0.202339	0.321	0.448
	GAB2	1.01856e-55	2.6894e-51	0.249093	0.27	0.12		RTTN	5.46609e-07	0.0144327	-0.152882	0.113	0.2		NR2F2-AS1	2.03703e-36	5.37858e-32	-0.236991	0.724	0.812									KCNC4	1.14545e-12	3.02444e-08	-0.156312	0.125	0.232		EMX2OS	2.30448e-05	0.608476	-0.188282	0.294	0.429		MON2	1.0191e-05	0.269083	0.216626	0.549	0.436
	MEF2A	1.24239e-55	3.2804e-51	0.333508	0.462	0.292		PUM1	5.69995e-07	0.0150502	0.15584	0.538	0.426		PROSER2	2.30737e-36	6.09239e-32	0.149318	0.134	0.06									AC008014.1	1.26151e-12	3.3309e-08	0.286222	0.549	0.412		FAM107B	2.44866e-05	0.646544	0.292363	0.346	0.221		VPS13C	1.02336e-05	0.270209	-0.182877	0.425	0.558
	JUN	1.41998e-55	3.74932e-51	0.159956	0.131	0.03		AC005062.1	5.7476e-07	0.015176	0.127405	0.222	0.138		TMEM132C	2.5632e-36	6.76787e-32	-0.179877	0.012	0.075									AL158071.1	1.32684e-12	3.50339e-08	0.147918	0.158	0.055		USP31	2.50421e-05	0.661211	-0.102538	0.059	0.133		ADGRA3	1.0708e-05	0.282734	-0.141258	0.183	0.297
	LYPLAL1-AS1	1.71353e-55	4.52439e-51	-0.208022	0.039	0.164		ANXA1	5.8611e-07	0.0154756	0.137478	0.077	0.031		CEP70	3.27319e-36	8.64252e-32	-0.199793	0.305	0.433									PCSK5	1.38557e-12	3.65847e-08	-0.182599	0.053	0.13		EMX2	2.58995e-05	0.683851	-0.175173	0.186	0.3		ACSS3	1.09259e-05	0.288487	-0.163157	0.162	0.267
	LRRC28	2.11743e-55	5.59086e-51	-0.258921	0.199	0.378		NAP1L1	5.94832e-07	0.0157059	0.105406	0.196	0.116		CDH3	4.20958e-36	1.1115e-31	0.132629	0.157	0.076									STAT1	1.43966e-12	3.80129e-08	-0.155557	0.093	0.189		LLGL2	2.69159e-05	0.710688	-0.174087	0.411	0.554		LHFPL3-AS2	1.09912e-05	0.290211	-0.218595	0.118	0.208
	IQCA1	2.51524e-55	6.64124e-51	0.221386	0.263	0.115		SGO1-AS1	6.11058e-07	0.0161344	-0.214609	0.209	0.308		TMEM176B	5.33832e-36	1.40953e-31	0.100336	0.115	0.047									TTC28	1.55093e-12	4.09509e-08	-0.206412	0.298	0.441		FGFR1	2.83232e-05	0.747846	-0.132811	0.063	0.138		RANBP17	1.14052e-05	0.301143	-0.149804	0.207	0.323
	DRICH1	2.72205e-55	7.18731e-51	-0.177984	0.035	0.157		UGGT2	6.56666e-07	0.0173386	0.150677	0.471	0.361		SUCLG2-AS1	5.3444e-36	1.41114e-31	-0.201206	0.267	0.396									EFR3A	1.55165e-12	4.09698e-08	-0.165985	0.172	0.293		TGFBR2	2.93769e-05	0.775667	-0.106322	0.079	0.162		VPS41	1.18603e-05	0.313161	-0.17906	0.191	0.297
	PPP1R21	3.52389e-55	9.30449e-51	-0.293492	0.38	0.557		PARM1	6.57979e-07	0.0173733	-0.106234	0.077	0.157		SLC4A7	7.97086e-36	2.10463e-31	-0.329475	0.448	0.548									TMEM245	1.65619e-12	4.373e-08	0.226754	0.455	0.316		XKR6	2.94021e-05	0.776333	-0.165272	0.357	0.512		LINC02649	1.27693e-05	0.337161	-0.219776	0.354	0.475
	DISC1	3.83138e-55	1.01164e-50	0.131018	0.089	0.011		MYO6	6.60897e-07	0.0174503	0.192854	0.737	0.646		LINC01503	8.76582e-36	2.31453e-31	0.113097	0.108	0.043									SPATA6L	1.67554e-12	4.4241e-08	-0.144856	0.102	0.202		ZFP36L2	2.94163e-05	0.776708	-0.114013	0.088	0.175		FRAS1	1.28032e-05	0.338055	0.267919	0.843	0.763
	PLCH2	4.05182e-55	1.06984e-50	-0.162184	0.008	0.105		BCAR3	6.89596e-07	0.0182081	0.11612	0.183	0.107		ATP6V1H	8.87706e-36	2.3439e-31	-0.191226	0.27	0.393									HIBADH	1.70595e-12	4.50439e-08	0.232483	0.454	0.314		ANKRD36	3.05904e-05	0.80771	-0.137302	0.128	0.229		INTS12	1.28401e-05	0.339031	-0.106593	0.049	0.116
	ESRRG	6.70824e-55	1.77124e-50	-0.285365	0.658	0.84		SLCO4C1	7.04503e-07	0.0186017	-0.130047	0.197	0.302		PDK4	1.40402e-35	3.70717e-31	-0.225799	0.165	0.282									TMEM38B	2.25952e-12	5.96604e-08	0.192053	0.253	0.131		SCPEP1	3.10223e-05	0.819114	0.169032	0.232	0.112		TOB1	1.37879e-05	0.364054	0.179503	0.198	0.098
	ALDH1A2	6.86829e-55	1.8135e-50	0.176666	0.091	0.012		NQO2	7.06314e-07	0.0186495	-0.147569	0.095	0.175		LINC01725	1.5779e-35	4.16629e-31	-0.214453	0.375	0.508									GAS6	2.38786e-12	6.30492e-08	0.141098	0.16	0.058		AC027288.3	3.12001e-05	0.823809	-0.12161	0.063	0.138		CEP295	1.43097e-05	0.377833	-0.110918	0.099	0.187
	ICA1	7.1063e-55	1.87635e-50	0.134355	0.106	0.018		PCK1	7.20622e-07	0.0190273	-0.130356	0.02	0.074		AMPH	1.89192e-35	4.99542e-31	-0.104835	0.01	0.069									ZNF43	2.41412e-12	6.37424e-08	-0.13767	0.071	0.156		AC119673.2	3.18876e-05	0.84196	-0.170882	0.12	0.217		NAA50	1.44234e-05	0.380837	0.162808	0.219	0.113
	CASR	9.2669e-55	2.44683e-50	0.188715	0.112	0.021		BACH1	7.31846e-07	0.0193237	0.167911	0.333	0.239		FCHO2	1.95062e-35	5.15042e-31	0.195549	0.353	0.24									XIST	2.42491e-12	6.40273e-08	0.477383	0.185	0.08		BTBD11	3.281e-05	0.866314	0.186597	0.143	0.046		AK9	1.44459e-05	0.381431	-0.160856	0.129	0.223
	STAT1	1.32789e-54	3.50615e-50	0.225776	0.181	0.061		AL139260.1	7.42439e-07	0.0196033	-0.13882	0.085	0.164		GAS6	2.21778e-35	5.85583e-31	-0.108385	0.036	0.113									AP005230.1	2.43587e-12	6.43167e-08	0.183028	0.11	0.025		KANK1	3.36349e-05	0.888097	0.298961	0.615	0.525		AC127526.2	1.44948e-05	0.382721	-0.117686	0.09	0.175
	AC015845.2	1.43284e-54	3.78328e-50	-0.187891	0.027	0.141		SEMA6A	7.43375e-07	0.0196281	0.174865	0.413	0.309		TXNIP	2.8492e-35	7.52303e-31	-0.199536	0.29	0.422									ABO	2.52219e-12	6.65959e-08	-0.117565	0.056	0.134		CAMKMT	3.37264e-05	0.890511	-0.218534	0.493	0.646		MAML3	1.5177e-05	0.400734	-0.208248	0.463	0.585
	LINC00955	2.23879e-54	5.91129e-50	-0.179338	0.046	0.174		DLG1	7.63746e-07	0.020166	0.201349	0.633	0.564		YBX3	2.9121e-35	7.6891e-31	0.136306	0.198	0.107									STX3	2.54946e-12	6.73159e-08	-0.140753	0.116	0.22		DNAH7	3.43204e-05	0.906196	-0.183341	0.238	0.358		CNGA1	1.54465e-05	0.40785	-0.123263	0.182	0.294
	IDH1	2.58081e-54	6.81437e-50	-0.216831	0.073	0.215		CEP170	7.70979e-07	0.0203569	0.115322	0.246	0.158		AFG3L2	3.25329e-35	8.58999e-31	-0.15116	0.123	0.229									PPP1CB	2.59782e-12	6.85927e-08	-0.188022	0.198	0.319		MAFIP	3.53671e-05	0.933833	0.1905	0.278	0.154		IFRD1	1.5873e-05	0.419109	0.362929	0.178	0.086
	RFTN1	3.09154e-54	8.16291e-50	0.169981	0.1	0.016		CNN3	7.80453e-07	0.0206071	0.128758	0.258	0.169		SLC25A4	3.50888e-35	9.26485e-31	-0.127351	0.055	0.14									SSBP2	2.62035e-12	6.91877e-08	-0.241547	0.211	0.33		EGF	3.54861e-05	0.936975	0.279831	0.21	0.1		GPHN	1.60553e-05	0.423924	0.236419	0.755	0.7
	CPVL	3.21139e-54	8.47936e-50	0.186077	0.165	0.051		COL4A1	7.9044e-07	0.0208708	0.301312	0.445	0.357		LINC02331	3.58241e-35	9.45901e-31	-0.103828	0.013	0.074									EML4	2.64444e-12	6.98238e-08	-0.190091	0.191	0.311		MYO5C	3.64921e-05	0.963537	-0.134658	0.19	0.308		JUND	1.65972e-05	0.438234	0.138964	0.143	0.056
	NCKAP5	4.27806e-54	1.12958e-49	-0.22211	0.647	0.807		BCL2	7.9757e-07	0.021059	0.240123	0.752	0.671		LIMK2	3.77806e-35	9.97558e-31	0.104725	0.124	0.053									LINC01138	2.8718e-12	7.5827e-08	-0.222208	0.402	0.535		STARD13	3.76963e-05	0.995334	0.257262	0.399	0.279		DYNC2LI1	1.70693e-05	0.450698	-0.164028	0.246	0.362
	SMIM35	5.03728e-54	1.33004e-49	-0.171103	0.006	0.1		EPS8	8.26101e-07	0.0218124	0.174359	0.638	0.532		OIP5-AS1	4.11409e-35	1.08628e-30	-0.159468	0.166	0.28									PREPL	2.93591e-12	7.75197e-08	0.200128	0.363	0.227		TNFAIP8	3.80361e-05	1	-0.136979	0.023	0.071		JAZF1	1.7859e-05	0.471549	-0.139831	0.103	0.19
	ZFPM2-AS1	6.27943e-54	1.65802e-49	0.29087	0.128	0.03		SLC7A9	8.36401e-07	0.0220843	-0.113131	0.069	0.144		ST3GAL4	4.12394e-35	1.08888e-30	-0.14265	0.07	0.16									AC113414.1	3.11882e-12	8.23494e-08	-0.170701	0.083	0.173		PLSCR1	3.83767e-05	1	-0.159795	0.161	0.267		GCNT4	1.80424e-05	0.476391	0.142576	0.16	0.068
	AC034111.2	6.8885e-54	1.81884e-49	-0.205575	0.043	0.168		MYO10	9.04588e-07	0.0238847	0.124263	0.215	0.135		PLXNA2	5.2568e-35	1.388e-30	-0.151529	0.072	0.163									TRIM56	3.3071e-12	8.73206e-08	-0.118928	0.062	0.144		DYNC1H1	3.93598e-05	1	-0.116524	0.127	0.229		UBE3C	1.8295e-05	0.483062	0.187845	0.353	0.231
	TIMD4	7.17967e-54	1.89572e-49	0.150697	0.137	0.034		CTNND1	9.26903e-07	0.024474	0.133872	0.599	0.476		PLCB4	5.58089e-35	1.47358e-30	0.133649	0.107	0.042									TBC1D9	3.31636e-12	8.75653e-08	-0.370332	0.592	0.659		IPCEF1	3.95071e-05	1	0.216815	0.315	0.192		PLCL2	1.83098e-05	0.483453	0.278781	0.703	0.591
	LRRC8D	7.20842e-54	1.90331e-49	-0.283373	0.333	0.515		PELI2	9.27043e-07	0.0244776	-0.162559	0.222	0.323		IPCEF1	6.39177e-35	1.68768e-30	0.262328	0.392	0.282									LINC01924	3.63873e-12	9.6077e-08	-0.104875	0.003	0.033		DNASE1	3.96934e-05	1	0.203505	0.195	0.088		AC093583.1	1.84703e-05	0.48769	0.138302	0.095	0.024
	SYNE1	8.08839e-54	2.13566e-49	0.345037	0.435	0.27		NECTIN2	9.39509e-07	0.0248068	0.10832	0.15	0.083		LINC01482	7.10114e-35	1.87498e-30	0.124667	0.081	0.027									EFCAB6	3.98973e-12	1.05345e-07	-0.176845	0.195	0.315		AC011586.2	3.97048e-05	1	0.328717	0.442	0.333		ZFP36L2	1.8631e-05	0.491933	-0.126043	0.137	0.237
	ZNF608	1.26825e-53	3.34869e-49	0.325063	0.381	0.219		CSNK2A1	9.63215e-07	0.0254327	0.159364	0.392	0.295		AC007637.1	7.60641e-35	2.0084e-30	-0.107875	0.037	0.114									MAP4K5	4.33425e-12	1.14442e-07	-0.166791	0.226	0.354		RAP1B	4.00271e-05	1	-0.198533	0.196	0.308		AC025159.1	1.86808e-05	0.493248	-0.105826	0.05	0.116
	PTPRJ	1.39783e-53	3.69084e-49	-0.350042	0.546	0.693		LRRIQ1	9.67278e-07	0.02554	0.135836	0.305	0.21		LINC02532	7.7928e-35	2.05761e-30	0.318021	0.617	0.559									LRRC69	4.73775e-12	1.25096e-07	-0.106699	0.052	0.127		UFL1-AS1	4.11287e-05	1	-0.108577	0.05	0.117		PCNX2	1.89767e-05	0.501061	-0.156712	0.26	0.38
	AC079630.1	2.75748e-53	7.28085e-49	0.152352	0.124	0.028		RELB	1.04194e-06	0.0275114	0.107517	0.144	0.079		TMEM164	7.91464e-35	2.08978e-30	-0.19656	0.196	0.311									SCHLAP1	4.83633e-12	1.27698e-07	-0.133537	0.061	0.142		ATRX	4.23682e-05	1	0.243035	0.504	0.379		PDE5A	1.92664e-05	0.508711	-0.16549	0.174	0.279
	CRADD	3.55321e-53	9.38188e-49	-0.29613	0.377	0.561		SUCLG1	1.05475e-06	0.0278496	-0.155556	0.101	0.182		LRRC37A3	8.27454e-35	2.18481e-30	-0.17344	0.224	0.344									SLC43A1	4.88456e-12	1.28972e-07	0.104453	0.08	0.008		HDAC7	4.27657e-05	1	-0.141988	0.106	0.196		EPB41L5	1.95685e-05	0.516687	0.242886	0.5	0.389
	SNHG14	3.60695e-53	9.52378e-49	-0.328477	0.562	0.711		LRMP	1.0558e-06	0.0278772	-0.100158	0.042	0.107		FECH	9.21401e-35	2.43287e-30	-0.150312	0.098	0.197									STAT6	5.14749e-12	1.35914e-07	-0.115367	0.054	0.13		MAP4K4	4.3141e-05	1	-0.13097	0.119	0.217		CLNS1A	2.07896e-05	0.54893	-0.12207	0.074	0.148
	PRR5	5.17456e-53	1.36629e-48	-0.209909	0.09	0.237		PTCSC3	1.08716e-06	0.0287054	-0.100355	0.028	0.086		MYOF	1.10304e-34	2.91248e-30	0.200727	0.355	0.243									CPQ	5.32589e-12	1.40625e-07	0.235851	0.459	0.322		FOXN3	4.41313e-05	1	0.248113	0.351	0.229		ELF2	2.1141e-05	0.558206	-0.202704	0.286	0.401
	POT1-AS1	6.24772e-53	1.64965e-48	0.256821	0.275	0.129		TANC1	1.08833e-06	0.0287364	0.120739	0.375	0.267		LEPR	1.13116e-34	2.98672e-30	0.148384	0.201	0.109									ADD3	5.60652e-12	1.48035e-07	0.232426	0.411	0.279		SLC8A1	4.50458e-05	1	-0.267499	0.853	0.921		SYT9	2.11705e-05	0.558986	0.195653	0.205	0.107
	PHF14	8.39328e-53	2.21616e-48	0.268545	0.355	0.195		AC011751.1	1.11729e-06	0.0295008	0.113648	0.103	0.049		ADAMTSL3	1.1668e-34	3.08081e-30	0.142677	0.183	0.096									AMOTL1	5.63044e-12	1.48666e-07	-0.111508	0.07	0.155		ATP1A1	4.59154e-05	1	-0.33381	0.451	0.567		LINC01578	2.13801e-05	0.564519	0.186974	0.266	0.157
	CDHR5	9.19246e-53	2.42718e-48	-0.177158	0.047	0.172		AHR	1.14079e-06	0.0301214	0.132255	0.21	0.131		AP3B1	1.27491e-34	3.36627e-30	-0.212766	0.403	0.521									GFPT1	6.46251e-12	1.70636e-07	-0.129798	0.086	0.177		WWC1	4.65363e-05	1	-0.272489	0.421	0.546		SKAP2	2.17575e-05	0.574486	-0.122716	0.062	0.134
	SPON2	9.98351e-53	2.63605e-48	0.151299	0.138	0.036		ARHGAP10	1.14715e-06	0.0302894	-0.21344	0.352	0.439		AL132780.1	1.74018e-34	4.59476e-30	-0.154677	0.091	0.188									KCNH1	6.94011e-12	1.83247e-07	0.164643	0.11	0.026		SPEF2	4.67104e-05	1	-0.129398	0.12	0.217		KMT2E	2.18728e-05	0.577529	0.200159	0.542	0.415
	MIR34AHG	1.20337e-52	3.17738e-48	0.14178	0.114	0.023		LINC02275	1.15297e-06	0.030443	-0.104219	0.047	0.114		NR1H4	1.94272e-34	5.12956e-30	0.159006	0.273	0.168									CTTN	7.40273e-12	1.95462e-07	-0.1449	0.143	0.253		XIST	4.71191e-05	1	0.472022	0.19	0.088		CTBP2	2.19509e-05	0.579592	0.185786	0.438	0.312
	MAN1C1	1.24358e-52	3.28356e-48	-0.380309	0.047	0.171		AC003984.1	1.26035e-06	0.0332783	-0.142612	0.121	0.209		UQCRC2	1.99957e-34	5.27965e-30	-0.158202	0.173	0.286									TRAK1	8.08277e-12	2.13418e-07	-0.240138	0.324	0.445		CD81	4.72998e-05	1	-0.109362	0.045	0.108		LRRK2	2.22197e-05	0.586689	-0.19012	0.318	0.436
	ANPEP	1.51286e-52	3.99456e-48	-0.258202	0.364	0.557		AP004608.1	1.29538e-06	0.0342032	-0.113246	0.078	0.155		ABO	2.12153e-34	5.60169e-30	0.117703	0.143	0.067									MLLT3	8.31106e-12	2.19445e-07	-0.277658	0.442	0.569		PIK3R3	4.73702e-05	1	-0.15165	0.154	0.262		DLG2	2.28812e-05	0.604154	0.246967	0.689	0.585
	SCRN1	1.5631e-52	4.12721e-48	0.104622	0.081	0.008		GSE1	1.32464e-06	0.0349758	-0.132663	0.1	0.181		ZNF208	2.19561e-34	5.79728e-30	-0.169884	0.075	0.167									GRB10	8.34218e-12	2.20267e-07	-0.105584	0.037	0.102		TMEM87A	4.79834e-05	1	-0.147604	0.17	0.279		ALCAM	2.32055e-05	0.612717	-0.137732	0.095	0.178
	N4BP2L2	1.6316e-52	4.30808e-48	-0.283325	0.583	0.733		SMAP1	1.35383e-06	0.0357465	0.114231	0.312	0.212		SIL1	2.76003e-34	7.28759e-30	-0.200259	0.264	0.382									RHPN2	8.50253e-12	2.24501e-07	-0.129792	0.093	0.186		AC073172.1	4.84215e-05	1	0.147988	0.102	0.021		ZNF486	2.36435e-05	0.624283	-0.120919	0.093	0.175
	TRPS1	1.65271e-52	4.36381e-48	-0.320858	0.527	0.687		LINC02294	1.39993e-06	0.0369637	-0.108964	0.067	0.141		CNNM2	3.76923e-34	9.95228e-30	-0.189784	0.18	0.293									TMEM108	8.65842e-12	2.28617e-07	0.19462	0.195	0.087		ICA1L	4.8481e-05	1	-0.122344	0.09	0.175		ADAP1	2.48095e-05	0.65507	0.143858	0.128	0.047
	LINC01876	1.71892e-52	4.53863e-48	0.269202	0.16	0.05		KCNJ16	1.42267e-06	0.0375643	-0.119014	0.106	0.189		RPL34-AS1	4.43656e-34	1.17143e-29	-0.149554	0.106	0.205									SUSD4	8.70985e-12	2.29975e-07	0.19897	0.296	0.17		TTC28	4.97762e-05	1	-0.218494	0.252	0.367		ID1	2.51323e-05	0.663593	0.247119	0.278	0.175
	GOSR2	2.13073e-52	5.62597e-48	-0.223426	0.095	0.242		LINC01428	1.446e-06	0.0381801	-0.114957	0.047	0.113		MAP2K6	4.60302e-34	1.21538e-29	-0.156577	0.099	0.197									ARFGAP3	1.08401e-11	2.86223e-07	-0.165958	0.15	0.258		DPP6	5.04822e-05	1	-0.175041	0.212	0.325		AC104827.1	2.52879e-05	0.667701	-0.141613	0.11	0.196
	GABRB3	2.29329e-52	6.0552e-48	-0.262286	0.073	0.21		MTAP	1.45164e-06	0.0383291	0.189107	0.341	0.253		ITSN2	4.94666e-34	1.30612e-29	0.19227	0.343	0.233									CTSD	1.09378e-11	2.88801e-07	-0.11583	0.057	0.133		TSC22D3	5.30149e-05	1	0.16978	0.107	0.025		KIAA1211L	2.58466e-05	0.682454	-0.109604	0.097	0.181
	SHANK2	2.32709e-52	6.14444e-48	-0.308792	0.477	0.641		DPH6-DT	1.47558e-06	0.0389611	-0.147052	0.106	0.188		SORBS2	5.09038e-34	1.34406e-29	0.242228	0.539	0.43									HMGA2-AS1	1.13206e-11	2.98908e-07	0.117307	0.104	0.023		AL357153.2	5.34074e-05	1	-0.113084	0.078	0.158		TGFBR2	2.60692e-05	0.688331	-0.104271	0.107	0.196
	MAMLD1	2.49685e-52	6.59268e-48	0.130046	0.078	0.007		SIPA1L2	1.49998e-06	0.0396055	0.100772	0.109	0.054		CPD	5.79196e-34	1.52931e-29	0.226524	0.256	0.159									SSH2	1.17965e-11	3.11474e-07	-0.219398	0.309	0.438		ZHX2	5.42523e-05	1	-0.164323	0.27	0.4		GRB14	2.64242e-05	0.697704	-0.109385	0.063	0.134
	MTCL1	4.6469e-52	1.22697e-47	0.21628	0.212	0.083		XIST	1.62678e-06	0.0429535	-0.231828	0.059	0.128		RNF144A	6.98818e-34	1.84516e-29	-0.119862	0.053	0.137									TRMT9B	1.44842e-11	3.82442e-07	-0.224116	0.295	0.417		RPL13	5.60394e-05	1	-0.105603	0.092	0.179		PIGU	2.71556e-05	0.717018	0.128957	0.133	0.05
	ZFAND5	5.5205e-52	1.45763e-47	-0.268563	0.136	0.291		DARS	1.63893e-06	0.0432742	0.102135	0.263	0.173		LETMD1	8.15041e-34	2.15203e-29	-0.159582	0.144	0.251									DCUN1D1	1.71562e-11	4.52991e-07	0.177945	0.275	0.153		ADD3	5.73875e-05	1	0.195244	0.331	0.204		TMEM178A	2.74621e-05	0.725108	-0.151022	0.157	0.258
	HSPA1B	6.36713e-52	1.68118e-47	0.167832	0.114	0.024		ANKRD28	1.64648e-06	0.0434735	0.135757	0.39	0.289		SULF2	9.51355e-34	2.51196e-29	0.10857	0.123	0.054									ST7	1.75143e-11	4.62448e-07	-0.178488	0.12	0.217		KCTD1	5.94532e-05	1	-0.169002	0.241	0.367		HNF4G	2.77372e-05	0.732374	-0.131417	0.102	0.187
	LINC01781	1.02765e-51	2.7134e-47	0.483776	0.544	0.406		SEL1L3	1.73868e-06	0.0459081	0.15981	0.378	0.283		ARL15	9.86675e-34	2.60522e-29	-0.242118	0.467	0.578									MYO5A	1.78891e-11	4.72344e-07	0.178125	0.342	0.209		AL513166.1	5.98948e-05	1	-0.108671	0.051	0.117		POGZ	2.82161e-05	0.745018	0.211994	0.424	0.312
	TNC	1.48691e-51	3.92604e-47	0.198115	0.076	0.007		TMEM106A	1.75261e-06	0.0462759	-0.100929	0.055	0.124		RAPH1	1.08148e-33	2.85554e-29	0.139511	0.208	0.117									STK39	1.84071e-11	4.86021e-07	-0.278396	0.523	0.609		STK38	5.99257e-05	1	-0.129239	0.133	0.233		ZFAND5	2.91983e-05	0.770952	0.183439	0.217	0.116
	IQGAP1	1.74442e-51	4.60596e-47	0.187288	0.194	0.071		ITSN1	1.78184e-06	0.0470477	0.143922	0.457	0.356		PRUNE2	1.11586e-33	2.94632e-29	0.120188	0.103	0.041									COL6A1	1.96432e-11	5.18659e-07	0.183372	0.254	0.138		MAPK10	6.10759e-05	1	-0.246059	0.778	0.863		SGMS1	2.94527e-05	0.777669	-0.202872	0.473	0.585
	PTPN13	1.7615e-51	4.65107e-47	0.339335	0.457	0.296		OSBPL6	1.89026e-06	0.0499104	-0.105607	0.054	0.121		TIPARP	1.15486e-33	3.0493e-29	-0.12671	0.036	0.11									NUMB	2.17542e-11	5.74399e-07	-0.205548	0.336	0.461		IQGAP2	6.12158e-05	1	0.205567	0.298	0.175		ARHGAP18	2.94539e-05	0.777701	-0.173102	0.133	0.226
	FREM2	1.76668e-51	4.66474e-47	-0.304827	0.266	0.437		ERBB3	1.89963e-06	0.0501579	-0.135796	0.15	0.239		PLXDC2	1.33005e-33	3.51186e-29	-0.254933	0.353	0.465									LNX1	2.25749e-11	5.96069e-07	0.200967	0.381	0.249		PRKCA	6.22063e-05	1	0.239871	0.692	0.592		RBPMS	2.94898e-05	0.778649	-0.196395	0.841	0.911
	TOX3	2.17039e-51	5.7307e-47	0.248898	0.266	0.124		ACADM	1.90175e-06	0.0502138	-0.116059	0.103	0.184		SLC7A8	1.34395e-33	3.54856e-29	-0.112894	0.028	0.097									RASGEF1B	2.45813e-11	6.49045e-07	0.244506	0.204	0.095		SP100	6.34175e-05	1	-0.128405	0.138	0.238		AC046134.2	2.97841e-05	0.786419	-0.142658	0.148	0.243
	FOXO1	2.68686e-51	7.09439e-47	-0.297987	0.331	0.511		RICTOR	1.95923e-06	0.0517315	0.172757	0.46	0.359		NMD3	1.38415e-33	3.65472e-29	-0.201674	0.264	0.385									PANK1	2.81114e-11	7.42252e-07	0.146719	0.17	0.07		EEF1A1	6.34871e-05	1	-0.131825	0.118	0.212		CCDC178	3.03598e-05	0.80162	-0.196637	0.14	0.234
	LRRFIP1	2.79729e-51	7.38596e-47	0.27111	0.328	0.173		TSHZ1	2.02447e-06	0.053454	-0.101181	0.054	0.122		INTS6	1.48574e-33	3.92294e-29	-0.204735	0.22	0.336									TSPAN7	2.84006e-11	7.49888e-07	0.148828	0.164	0.066		SGK1	6.40882e-05	1	0.170344	0.13	0.042		SOCS2-AS1	3.06509e-05	0.809307	-0.102604	0.046	0.107
	TRPC7-AS1	2.90117e-51	7.66024e-47	-0.179743	0.051	0.177		ACAD11	2.04639e-06	0.0540328	-0.145039	0.165	0.257		ARSJ	1.61756e-33	4.27101e-29	0.129366	0.166	0.084									FOXO1	3.05502e-11	8.06649e-07	-0.304414	0.29	0.405		SMIM5	6.46883e-05	1	0.117682	0.093	0.017		WDR11-AS1	3.31059e-05	0.874129	-0.110157	0.05	0.113
	EDA	3.42128e-51	9.03356e-47	-0.323884	0.216	0.384		SPEF2	2.12999e-06	0.0562402	-0.152183	0.204	0.298		AC008415.1	1.82628e-33	4.8221e-29	-0.160452	0.01	0.067									RAPH1	3.2998e-11	8.71279e-07	-0.143656	0.126	0.227		PTCSC3	6.48963e-05	1	0.143253	0.099	0.021		NUTM2B-AS1	3.3787e-05	0.892112	-0.141695	0.282	0.404
	MT2A	4.71673e-51	1.2454e-46	0.31838	0.193	0.072		MINDY2	2.16846e-06	0.0572561	0.120165	0.241	0.158		AL139383.1	1.90848e-33	5.03914e-29	-0.196747	0.266	0.389									RUNX1	3.33443e-11	8.80423e-07	-0.121116	0.034	0.094		LINC02341	6.57246e-05	1	-0.1182	0.038	0.096		EFCAB2	3.50014e-05	0.924177	-0.162059	0.156	0.252
	MPPED2	5.20677e-51	1.37479e-46	0.167568	0.126	0.031		AC090579.1	2.17195e-06	0.0573483	0.128631	0.328	0.233		LINC01594	2.19025e-33	5.78313e-29	-0.155022	0.107	0.206									PHACTR4	3.40353e-11	8.98668e-07	-0.220348	0.277	0.395		RASAL1	7.18486e-05	1	-0.105395	0.076	0.154		SCML1	3.58321e-05	0.946111	0.160348	0.261	0.154
	SHROOM4	5.2819e-51	1.39463e-46	-0.318231	0.273	0.445		PLS1	2.25109e-06	0.0594377	0.14269	0.302	0.211		APP	2.24564e-33	5.92938e-29	0.245418	0.709	0.622									RELL1	4.20982e-11	1.11156e-06	0.173054	0.24	0.127		WNK4	7.31582e-05	1	0.16165	0.129	0.042		ITPR3	3.67582e-05	0.970562	-0.102236	0.095	0.178
	AL353138.1	5.63048e-51	1.48667e-46	0.134054	0.061	0.002		ASTN2	2.40614e-06	0.0635318	0.213376	0.509	0.422		NOS1AP	2.42383e-33	6.39988e-29	-0.199209	0.382	0.511									STIM2	4.26176e-11	1.12527e-06	-0.172466	0.107	0.199		FGF14	7.50636e-05	1	-0.128864	0.029	0.079		C5orf17	3.69186e-05	0.9748	-0.152016	0.026	0.074
	CTDSPL	6.63213e-51	1.75115e-46	0.285629	0.351	0.196		ANO6	2.4128e-06	0.0637077	0.148288	0.254	0.171		AC011287.1	2.71755e-33	7.17541e-29	0.168615	0.101	0.04									AL158071.4	4.32601e-11	1.14224e-06	0.104573	0.087	0.015		ALPK1	7.65775e-05	1	-0.128191	0.157	0.262		SLIT2	3.72183e-05	0.982713	-0.299992	0.089	0.166
	TNFRSF21	7.34742e-51	1.94001e-46	-0.306693	0.234	0.405		TENM2	2.5541e-06	0.0674385	-0.171505	0.104	0.184		FASTKD1	2.92751e-33	7.72979e-29	-0.152949	0.139	0.246									DNAAF4	4.59639e-11	1.21363e-06	-0.14577	0.109	0.203		FOSL2	7.69157e-05	1	-0.138458	0.109	0.196		RALGAPA2	3.92655e-05	1	-0.154215	0.296	0.415
	ZBED3-AS1	7.69766e-51	2.03249e-46	-0.292702	0.087	0.225		AMN	2.66066e-06	0.0702521	-0.100556	0.06	0.129		FUT8	3.09613e-33	8.17502e-29	0.140462	0.185	0.099									ALCAM	4.7809e-11	1.26235e-06	-0.116934	0.042	0.108		LINC00278	7.72132e-05	1	0.268982	0.388	0.262		ITGA2	4.03857e-05	1	-0.217931	0.319	0.433
	SLC39A14	7.89814e-51	2.08543e-46	-0.253648	0.123	0.275		PTPN14	2.72065e-06	0.0718359	0.174055	0.467	0.364		IRS1	3.19013e-33	8.42321e-29	-0.160079	0.109	0.207									FER	4.79074e-11	1.26495e-06	-0.21463	0.39	0.521		MOB1B	7.76972e-05	1	0.212465	0.342	0.212		SCNN1G	4.05743e-05	1	0.283047	0.558	0.442
	AC114812.2	9.78621e-51	2.58395e-46	-0.312779	0.136	0.288		HDHD3	2.77832e-06	0.0733586	-0.123901	0.121	0.203		LLGL2	3.39893e-33	8.97453e-29	0.205164	0.542	0.429									TGFA	5.13858e-11	1.35679e-06	-0.121137	0.091	0.18		CLSTN2	7.90681e-05	1	-0.101024	0.022	0.067		ATF7	4.09324e-05	1	-0.127847	0.138	0.231
	TMC1	1.15895e-50	3.0601e-46	-0.265	0.034	0.147		PLXDC2	2.84114e-06	0.0750173	-0.181118	0.688	0.759		ANKH	3.46137e-33	9.13941e-29	-0.146606	0.086	0.179									RNF152	5.23027e-11	1.381e-06	0.185732	0.179	0.08		SRGAP1	7.97109e-05	1	-0.211346	0.117	0.204		TC2N	4.12499e-05	1	-0.154098	0.123	0.211
	MTHFS	1.18653e-50	3.1329e-46	-0.240441	0.16	0.321		ANKLE2	2.86605e-06	0.0756752	0.106593	0.192	0.119		RIN2	4.64597e-33	1.22672e-28	0.182474	0.356	0.245									C3orf52	5.87027e-11	1.54999e-06	0.15915	0.198	0.094		RALBP1	7.99635e-05	1	0.255484	0.413	0.292		KRT19	4.19658e-05	1	0.37467	0.477	0.383
	GSTA1	1.21113e-50	3.19786e-46	-0.153903	0.016	0.115		SLC2A9	2.89391e-06	0.0764108	-0.24032	0.613	0.682		CELF6	4.89659e-33	1.2929e-28	-0.113085	0.039	0.113									SIPA1L1	5.91741e-11	1.56243e-06	-0.235111	0.366	0.486		CEP162	8.03465e-05	1	-0.129709	0.157	0.262		DUSP2	4.39005e-05	1	0.145578	0.076	0.015
	ABCC4	1.41211e-50	3.72853e-46	0.355911	0.57	0.414		ZNF704	2.91832e-06	0.0770552	-0.162961	0.23	0.323		CNTN1	5.65067e-33	1.492e-28	-0.19123	0.136	0.241									AC013652.1	6.00808e-11	1.58637e-06	0.20407	0.202	0.097		APPL2	8.19663e-05	1	-0.163903	0.22	0.333		TBL1Y	4.40093e-05	1	0.118044	0.118	0.042
	GALNT2	1.44592e-50	3.81781e-46	-0.251208	0.21	0.381		RPS6KC1	2.93058e-06	0.077379	0.113465	0.302	0.207		TMEM45B	8.06814e-33	2.13031e-28	-0.149384	0.103	0.199									FILIP1L	6.56068e-11	1.73228e-06	-0.115908	0.074	0.155		WDR44	8.32377e-05	1	-0.116502	0.113	0.204		TRA2B	4.42026e-05	1	0.156197	0.233	0.131
	MRAS	1.5514e-50	4.09632e-46	0.126091	0.102	0.019		EVA1C	3.02158e-06	0.0797819	0.135893	0.254	0.17		EIF4G3	8.10176e-33	2.13919e-28	0.220013	0.578	0.467									CFAP47	8.25141e-11	2.1787e-06	-0.170442	0.089	0.174		ERC2	8.42125e-05	1	-0.111411	0.077	0.154		IQUB	4.49094e-05	1	-0.236932	0.356	0.46
	DPH6-DT	1.63527e-50	4.31777e-46	-0.250941	0.169	0.337		PTGR1	3.04342e-06	0.0803584	-0.137681	0.157	0.244		UPP1	8.36464e-33	2.2086e-28	0.105457	0.099	0.039									TLE1	9.54388e-11	2.51997e-06	-0.119901	0.066	0.142		NUAK2	8.604e-05	1	-0.115696	0.094	0.179		NPNT	4.66362e-05	1	-0.21034	0.238	0.341
	ASTN2	2.00519e-50	5.2945e-46	-0.34085	0.443	0.617		CCDC91	3.07354e-06	0.0811537	0.132931	0.509	0.396		WWC1	9.70044e-33	2.5613e-28	0.361814	0.516	0.429									SEPTIN9	9.98599e-11	2.6367e-06	-0.162724	0.161	0.267		CDK19	8.63598e-05	1	-0.148597	0.226	0.346		PDXK	4.80874e-05	1	0.1936	0.235	0.136
	PTPRE	2.09024e-50	5.51906e-46	0.135556	0.1	0.018		TSPAN9	3.26429e-06	0.0861904	-0.143205	0.171	0.262		GPC3	9.87897e-33	2.60844e-28	-0.178393	0.129	0.232									NPHP1	1.01103e-10	2.66952e-06	-0.112572	0.093	0.181		HLF	8.94795e-05	1	-0.131902	0.163	0.267		TACC2	4.87735e-05	1	0.17575	0.219	0.122
	LINC02351	2.3699e-50	6.25748e-46	0.125373	0.081	0.01		ACSL1	3.31472e-06	0.0875218	-0.152642	0.096	0.171		ARAP2	1.05713e-32	2.79124e-28	0.176417	0.315	0.209									HSPA4L	1.08308e-10	2.85976e-06	0.159063	0.237	0.126		LINC01435	8.99391e-05	1	0.187622	0.09	0.017		LINC01508	4.89749e-05	1	-0.127231	0.135	0.228
	SPATA6L	2.72159e-50	7.18608e-46	0.153038	0.147	0.043		PICALM	3.49123e-06	0.0921826	0.148707	0.808	0.735		OXCT1	1.16209e-32	3.06838e-28	-0.159484	0.111	0.208									DNASE1	1.12967e-10	2.98279e-06	0.1786	0.29	0.171		AEBP2	9.09498e-05	1	-0.204988	0.271	0.388		ARL4D	4.96399e-05	1	0.125602	0.112	0.039
	MID1	2.8254e-50	7.46018e-46	0.19201	0.152	0.046		TRABD2B	3.58192e-06	0.0945769	-0.15657	0.512	0.618		HNF1A-AS1	1.22e-32	3.22128e-28	-0.224257	0.406	0.523									ALPK1	1.14345e-10	3.01916e-06	-0.146766	0.166	0.273		ODF2L	9.17501e-05	1	-0.143637	0.221	0.338		GRAMD2B	5.10722e-05	1	-0.180062	0.343	0.463
	DDX17	4.53985e-50	1.1987e-45	0.280792	0.617	0.46		ADORA2A-AS1	3.65515e-06	0.0965105	-0.10873	0.06	0.127		SYT1	1.29713e-32	3.42493e-28	-0.131735	0.059	0.142									LINC02615	1.15331e-10	3.04519e-06	-0.140846	0.1	0.189		ATR	9.26673e-05	1	-0.166235	0.239	0.358		EGOT	5.11319e-05	1	-0.111618	0.094	0.175
	ZBTB20-AS5	4.67452e-50	1.23426e-45	0.211541	0.212	0.086		ARHGAP21	3.756e-06	0.0991734	0.138594	0.333	0.243		STEAP2-AS1	1.36972e-32	3.6166e-28	-0.153829	0.054	0.134									ACAD11	1.18038e-10	3.11668e-06	0.180193	0.303	0.182		ITGAV	9.35182e-05	1	-0.30434	0.302	0.4		PCLO	5.11954e-05	1	-0.212363	0.331	0.448
	NBEA	4.95703e-50	1.30885e-45	0.331248	0.601	0.454		B2M	3.81298e-06	0.100678	0.105205	0.194	0.119		DENND1A	1.6148e-32	4.26371e-28	-0.190864	0.347	0.469									GRB14	1.2005e-10	3.1698e-06	0.212786	0.703	0.595		PDLIM5	9.36106e-05	1	-0.19676	0.252	0.362		DCUN1D1	5.18748e-05	1	0.182399	0.26	0.157
	ZNF385B	5.87023e-50	1.54998e-45	0.392681	0.457	0.297		KCNIP1	3.81315e-06	0.100683	0.127511	0.132	0.073		ARHGEF28	1.68798e-32	4.45693e-28	0.188521	0.601	0.486									KCNJ1	1.20903e-10	3.19233e-06	0.195536	0.401	0.273		RPL17	9.52816e-05	1	-0.103503	0.066	0.138		AC079142.1	5.30227e-05	1	-0.145868	0.237	0.35
	UGT1A9	6.70264e-50	1.76976e-45	-0.149473	0.021	0.124		FGF13	3.83179e-06	0.101174	0.24443	0.398	0.3		SEMA4D	2.08148e-32	5.49595e-28	0.160762	0.274	0.173									RASGRF2	1.32224e-10	3.49124e-06	-0.156985	0.118	0.211		PDE10A	9.70781e-05	1	0.545884	0.3	0.196		RFX3-AS1	5.30731e-05	1	-0.147582	0.254	0.368
	ARSI	1.52294e-49	4.02118e-45	-0.143937	0.009	0.101		ATP11A	3.87562e-06	0.102332	0.171369	0.55	0.454		CDKL1	2.8299e-32	7.47208e-28	-0.185786	0.277	0.397									ARL17A	1.32443e-10	3.49704e-06	0.142901	0.194	0.091		CTSD	9.93382e-05	1	-0.103699	0.077	0.154		AC099788.1	5.35672e-05	1	-0.144249	0.086	0.16
[truncated: 1,375 more rows]

## Sheet: Supplementary Table 6
	Supplementary Table 6. PT trajectory gene expression dynamics.
[truncated: 143 more rows]

## Sheet: Supplementary Table 7
	Supplementary Table 7. TAL trajectory gene expression dynamics.
[truncated: 102 more rows]

## Sheet: Supplementary Table 8
	Supplementary Table 8. Shared and distinct reponses in nephron segments.
[truncated: 196 more rows]
[truncated: 10 more columns]

[truncated: 12 more sheets: Supplementary Table 9, Supplementary Table 10, Supplementary Table 11, Supplementary Table 12, Supplementary Table 13, Supplementary Table 14, Supplementary Table 15, Supplementary Table 16, Supplementry Table 17, Supplementary Table 18, Supplementary Table 19, Supplementary Table 20]
